# Supplementary material
Source: publisher figshare collection journal article supplement (https://acs.figshare.com/ndownloader/files/5459576)
Supplement: Supplementary file 1 [file 5459576]

data_Ustrnul_LU154E
                                     
_audit_creation_method
;
by MiB
;
_shelx_SHELXL_version_number        '2014/7'
_chemical_name_systematic           ?
_chemical_name_common               ?
_chemical_melting_point             ?
_chemical_formula_moiety            ?
_chemical_formula_sum
              'C42 H54 N20 O10'
_chemical_formula_weight            999.05
                                     
loop_
 _atom_type_symbol
 _atom_type_description
 _atom_type_scat_dispersion_real
 _atom_type_scat_dispersion_imag
 _atom_type_scat_source
 'C'  'C'   0.0033   0.0016
 'International Tables Vol C Tables 4.2.6.8 and 6.1.1.4'
 'H'  'H'   0.0000   0.0000
 'International Tables Vol C Tables 4.2.6.8 and 6.1.1.4'
 'N'  'N'   0.0061   0.0033
 'International Tables Vol C Tables 4.2.6.8 and 6.1.1.4'
 'O'  'O'   0.0106   0.0060
 'International Tables Vol C Tables 4.2.6.8 and 6.1.1.4'

_space_group_crystal_system         triclinic
_space_group_IT_number              2
_space_group_name_H-M_alt           'P -1'
_space_group_name_Hall              '-P 1'
                                     
_shelx_space_group_comment
;
The symmetry employed for this shelxl refinement is uniquely defined
by the following loop, which should always be used as a source of
symmetry information in preference to the above space-group names.
They are only intended as comments.
;
                                     
loop_
 _space_group_symop_operation_xyz
 'x, y, z'
 '-x, -y, -z'

_cell_length_a                      12.8019(3)
_cell_length_b                      18.7511(5)
_cell_length_c                      26.0731(6)
_cell_angle_alpha                   85.372(2)
_cell_angle_beta                    79.229(2)
_cell_angle_gamma                   89.774(2)
_cell_volume                        6128.1(3)
_cell_formula_units_Z               4
_cell_measurement_temperature       120(2)
_cell_measurement_reflns_used       17869
_cell_measurement_theta_min         1.6020
_cell_measurement_theta_max         29.6330
                                     
_exptl_crystal_description          'prism'
_exptl_crystal_colour               'colourless'
_exptl_crystal_density_meas         ?
_exptl_crystal_density_method       ?
_exptl_crystal_density_diffrn       1.083
_exptl_crystal_F_000                2104
_exptl_transmission_factor_min      ?
_exptl_transmission_factor_max      ?
_exptl_crystal_size_max             0.170
_exptl_crystal_size_mid             0.140
_exptl_crystal_size_min             0.120
_exptl_absorpt_coefficient_mu       0.081
_shelx_estimated_absorpt_T_min      0.986
_shelx_estimated_absorpt_T_max      0.990
_exptl_absorpt_correction_type      'multi-scan'
_exptl_absorpt_correction_T_min     0.83880
_exptl_absorpt_correction_T_max     1.00000
_exptl_absorpt_process_details
;
CrysAlisPro, Agilent Technologies,
Version 1.171.37.35 (release 13-08-2014 CrysAlis171 .NET)
(compiled Aug 13 2014,18:06:01)
Empirical absorption correction using spherical harmonics,
 implemented in SCALE3 ABSPACK scaling algorithm.
;
_exptl_absorpt_special_details      ?
_diffrn_ambient_temperature         120(2)
_diffrn_radiation_wavelength        0.71075
_diffrn_radiation_type              'Molybdenum K\a'
_diffrn_source                      'Rotating Anode MicroMax-007HF DW 1.2 kW'
                                     
_diffrn_standards_number            0
_diffrn_standards_interval_count    infinity
_diffrn_standards_decay_%           0(infinity)
                                     
_diffrn_measurement_device_type     'AFC11 (Right): Eulerian 3 circle'
_diffrn_measurement_method          'Profile data from \w-scans'
_diffrn_detector_area_resol_mean    ?
_diffrn_reflns_number               59420
_diffrn_reflns_av_unetI/netI        0.0581
_diffrn_reflns_av_R_equivalents     0.0481
_diffrn_reflns_limit_h_min          -15
_diffrn_reflns_limit_h_max          15
_diffrn_reflns_limit_k_min          -22
_diffrn_reflns_limit_k_max          22
_diffrn_reflns_limit_l_min          -31
_diffrn_reflns_limit_l_max          31
_diffrn_reflns_theta_min            1.595
_diffrn_reflns_theta_max            25.682
_diffrn_reflns_theta_full           25.242
_diffrn_measured_fraction_theta_max 0.999
_diffrn_measured_fraction_theta_full 0.999
_diffrn_reflns_Laue_measured_fraction_max 0.999
_diffrn_reflns_Laue_measured_fraction_full 0.999
_diffrn_reflns_point_group_measured_fraction_max 0.999
_diffrn_reflns_point_group_measured_fraction_full 0.999
_reflns_number_total                23295
_reflns_number_gt                   16699
_reflns_threshold_expression        'I > 2\s(I)'
_reflns_Friedel_coverage            0.000
_reflns_Friedel_fraction_max        .
_reflns_Friedel_fraction_full       .
                                     
_reflns_special_details
;
 Reflections were merged by SHELXL according to the crystal
 class for the calculation of statistics and refinement.

 Structure factors included contributions from the .fab file.

 _reflns_Friedel_fraction is defined as the number of unique
 Friedel pairs measured divided by the number that would be
 possible theoretically, ignoring centric projections and
 systematic absences.
;
                                     
_computing_data_collection
;
CrystalClear-SM Expert 2.0 r15 (Rigaku, 2011)
;
_computing_cell_refinement
;
CrysAlisPro, Agilent Technologies,
Version 1.171.37.35 (release 13-08-2014 CrysAlis171 .NET)
(compiled Aug 13 2014,18:06:01)
;
_computing_data_reduction
;
CrysAlisPro, Agilent Technologies,
Version 1.171.37.35 (release 13-08-2014 CrysAlis171 .NET)
(compiled Aug 13 2014,18:06:01)
;
_computing_structure_solution       ?
_computing_structure_refinement     'SHELXL-2014/7 (Sheldrick, 2014)'
_computing_molecular_graphics       ?
_computing_publication_material     ?
_refine_special_details             ?
_refine_ls_structure_factor_coef    Fsqd
_refine_ls_matrix_type              full
_refine_ls_weighting_scheme         calc
_refine_ls_weighting_details
 'w=1/[\s^2^(Fo^2^)+(0.0899P)^2^+6.6842P] where P=(Fo^2^+2Fc^2^)/3'
_atom_sites_solution_primary        ?
_atom_sites_solution_secondary      ?
_atom_sites_solution_hydrogens      geom
_refine_ls_hydrogen_treatment       constr
_refine_ls_extinction_method        none
_refine_ls_extinction_coef          .
_refine_ls_number_reflns            23295
_refine_ls_number_parameters        1313
_refine_ls_number_restraints        1446
_refine_ls_R_factor_all             0.0913
_refine_ls_R_factor_gt              0.0660
_refine_ls_wR_factor_ref            0.1843
_refine_ls_wR_factor_gt             0.1717
_refine_ls_goodness_of_fit_ref      1.029
_refine_ls_restrained_S_all         1.001
_refine_ls_shift/su_max             0.000
_refine_ls_shift/su_mean            0.000
                                     
loop_
 _atom_site_label
 _atom_site_type_symbol
 _atom_site_fract_x
 _atom_site_fract_y
 _atom_site_fract_z
 _atom_site_U_iso_or_equiv
 _atom_site_adp_type
 _atom_site_occupancy
 _atom_site_site_symmetry_order
 _atom_site_calc_flag
 _atom_site_refinement_flags_posn
 _atom_site_refinement_flags_adp
 _atom_site_refinement_flags_occupancy
 _atom_site_disorder_assembly
 _atom_site_disorder_group
O1 O 1.16051(15) 0.66273(12) 0.28851(8) 0.0241(5) Uani 1 1 d . U . . .
O2 O 0.71607(15) 0.59971(11) 0.23184(8) 0.0220(4) Uani 1 1 d . U . . .
O3 O 1.26807(17) 0.60177(12) 0.17435(8) 0.0265(5) Uani 1 1 d . U . . .
O4 O 0.85616(17) 0.54059(12) 0.12576(10) 0.0331(5) Uani 1 1 d . U . . .
O5 O 1.28584(18) 0.43345(13) 0.20512(9) 0.0332(5) Uani 1 1 d . U . . .
O6 O 0.87415(17) 0.37739(12) 0.14561(9) 0.0302(5) Uani 1 1 d . U . . .
O7 O 1.1879(2) 0.3853(2) 0.33205(13) 0.0718(11) Uani 1 1 d . U . . .
O8 O 0.76814(18) 0.33911(14) 0.27655(9) 0.0389(6) Uani 1 1 d . U . . .
O9 O 1.09374(17) 0.53213(13) 0.37340(9) 0.0337(5) Uani 1 1 d . U . . .
O10 O 0.68597(18) 0.48222(12) 0.32749(10) 0.0365(6) Uani 1 1 d . U . . .
O11 O 0.65551(16) 0.77395(11) 0.29166(8) 0.0238(5) Uani 1 1 d . U . . .
O12 O 0.21054(15) 0.84984(11) 0.23295(8) 0.0214(4) Uani 1 1 d . U . . .
O13 O 0.59241(17) 0.88216(12) 0.37816(9) 0.0300(5) Uani 1 1 d . U . . .
O14 O 0.19411(17) 0.95007(12) 0.32511(8) 0.0284(5) Uani 1 1 d . U . . .
O15 O 0.68512(18) 1.02863(13) 0.32688(9) 0.0343(6) Uani 1 1 d . U . . .
O16 O 0.26927(17) 1.10794(13) 0.27582(8) 0.0284(5) Uani 1 1 d . U . . .
O17 O 0.79280(17) 1.01599(12) 0.20211(8) 0.0270(5) Uani 1 1 d . U . . .
O18 O 0.38074(16) 1.08591(12) 0.14725(9) 0.0287(5) Uani 1 1 d . U . . .
O19 O 0.76911(16) 0.85625(12) 0.17434(8) 0.0252(5) Uani 1 1 d . U . . .
O20 O 0.35412(16) 0.93179(11) 0.12244(8) 0.0255(5) Uani 1 1 d . U . . .
N1 N 0.97794(18) 0.66604(13) 0.31566(9) 0.0200(5) Uani 1 1 d . U . . .
N2 N 0.80524(18) 0.64009(13) 0.29319(9) 0.0190(5) Uani 1 1 d . U . . .
N3 N 0.87131(19) 0.66700(13) 0.20898(9) 0.0194(5) Uani 1 1 d . U . . .
N4 N 1.04520(18) 0.69040(13) 0.23135(9) 0.0187(5) Uani 1 1 d . U . . .
N5 N 1.13407(19) 0.66189(13) 0.14481(9) 0.0206(5) Uani 1 1 d . U . . .
N6 N 0.96155(19) 0.63821(13) 0.12224(9) 0.0189(5) Uani 1 1 d . U . . .
N7 N 1.02863(19) 0.53463(13) 0.08449(9) 0.0205(5) Uani 1 1 d . U . . .
N8 N 1.20015(19) 0.55712(13) 0.10829(9) 0.0213(5) Uani 1 1 d . U . . .
N9 N 1.2163(2) 0.42816(14) 0.13126(10) 0.0233(5) Uani 1 1 d . U . . .
N10 N 1.04480(19) 0.40560(13) 0.10682(9) 0.0206(5) Uani 1 1 d . U . . .
N11 N 1.00723(19) 0.31742(13) 0.17652(9) 0.0203(5) Uani 1 1 d . U . . .
N12 N 1.1799(2) 0.33808(14) 0.19964(10) 0.0230(5) Uani 1 1 d . U . . .
N13 N 1.1045(2) 0.30577(14) 0.29240(10) 0.0247(6) Uani 1 1 d . U . . .
N14 N 0.93064(19) 0.28718(14) 0.26900(10) 0.0231(5) Uani 1 1 d . U . . .
N15 N 0.8467(2) 0.33024(14) 0.34809(10) 0.0252(6) Uani 1 1 d . U . . .
N16 N 1.0201(2) 0.35062(15) 0.37029(10) 0.0277(6) Uani 1 1 d . U . . .
N17 N 0.9520(2) 0.46029(14) 0.40963(10) 0.0255(6) Uani 1 1 d . U . . .
N18 N 0.7771(2) 0.43786(13) 0.38963(10) 0.0244(6) Uani 1 1 d . U . . .
N19 N 0.75770(19) 0.56179(13) 0.37264(9) 0.0209(5) Uani 1 1 d . U . . .
N20 N 0.9318(2) 0.58357(14) 0.39360(9) 0.0227(5) Uani 1 1 d . U . . .
N21 N 0.54184(18) 0.75963(13) 0.23391(9) 0.0195(5) Uani 1 1 d . U . . .
N22 N 0.36768(18) 0.78854(13) 0.21105(9) 0.0185(5) Uani 1 1 d . U . . .
N23 N 0.30098(18) 0.79728(13) 0.29508(9) 0.0195(5) Uani 1 1 d . U . . .
N24 N 0.47220(18) 0.76636(14) 0.31857(9) 0.0205(5) Uani 1 1 d . U . . .
N25 N 0.42808(19) 0.83003(14) 0.39720(10) 0.0222(5) Uani 1 1 d . U . . .
N26 N 0.25615(19) 0.86025(13) 0.37434(10) 0.0220(5) Uani 1 1 d . U . . .
N27 N 0.28054(19) 0.97982(13) 0.38898(9) 0.0212(5) Uani 1 1 d . U . . .
N28 N 0.45250(19) 0.95015(13) 0.41195(9) 0.0211(5) Uani 1 1 d . U . . .
N29 N 0.5238(2) 1.06601(14) 0.36895(9) 0.0221(5) Uani 1 1 d . U . . .
N30 N 0.35134(19) 1.09617(14) 0.34605(9) 0.0223(5) Uani 1 1 d . U . . .
N31 N 0.43696(19) 1.15454(13) 0.26667(9) 0.0208(5) Uani 1 1 d . U . . .
N32 N 0.60982(19) 1.12483(13) 0.28938(9) 0.0209(5) Uani 1 1 d . U . . .
N33 N 0.68819(19) 1.11379(13) 0.19700(9) 0.0202(5) Uani 1 1 d . U . . .
N34 N 0.51449(19) 1.14174(13) 0.17478(9) 0.0199(5) Uani 1 1 d . U . . .
N35 N 0.55014(18) 1.06865(13) 0.10536(9) 0.0185(5) Uani 1 1 d . U . . .
N36 N 0.72201(19) 1.03884(13) 0.12869(9) 0.0203(5) Uani 1 1 d . U . . .
N37 N 0.70085(19) 0.91481(13) 0.10794(9) 0.0202(5) Uani 1 1 d . U . . .
N38 N 0.52916(18) 0.94470(13) 0.08432(9) 0.0184(5) Uani 1 1 d . U . . .
N39 N 0.46036(18) 0.83459(12) 0.12403(9) 0.0170(5) Uani 1 1 d . U . . .
N40 N 0.63195(18) 0.80412(13) 0.14713(9) 0.0194(5) Uani 1 1 d . U . . .
C1 C 1.0706(2) 0.67136(16) 0.27956(11) 0.0200(6) Uani 1 1 d . U . . .
C2 C 0.8869(2) 0.69269(15) 0.29387(11) 0.0181(6) Uani 1 1 d . U . . .
H2 H 0.8565 0.7361 0.3108 0.022 Uiso 1 1 calc R U . . .
C3 C 0.7903(2) 0.63144(15) 0.24359(11) 0.0165(6) Uani 1 1 d . U . . .
C4 C 0.9348(2) 0.71066(15) 0.23517(11) 0.0180(6) Uani 1 1 d . U . . .
H4 H 0.9281 0.7627 0.2246 0.022 Uiso 1 1 calc R U . . .
C5 C 1.1270(2) 0.71025(16) 0.18645(11) 0.0199(6) Uani 1 1 d . U . . .
H5A H 1.1964 0.7114 0.1979 0.024 Uiso 1 1 calc R U . . .
H5B H 1.1129 0.7592 0.1722 0.024 Uiso 1 1 calc R U . . .
C6 C 0.8746(2) 0.67549(16) 0.15312(11) 0.0193(6) Uani 1 1 d . U . . .
H6A H 0.8808 0.7271 0.1415 0.023 Uiso 1 1 calc R U . . .
H6B H 0.8065 0.6578 0.1459 0.023 Uiso 1 1 calc R U . . .
C7 C 1.2037(2) 0.60591(16) 0.14456(11) 0.0219(6) Uani 1 1 d . U . . .
C8 C 1.0651(2) 0.67397(16) 0.10648(11) 0.0205(6) Uani 1 1 d . U . . .
H8 H 1.0532 0.7266 0.1014 0.025 Uiso 1 1 calc R U . . .
C9 C 0.9442(2) 0.56911(16) 0.11227(11) 0.0200(6) Uani 1 1 d . U . . .
C10 C 1.1339(2) 0.56785(16) 0.06827(11) 0.0229(6) Uani 1 1 d . U . . .
H10 H 1.1707 0.5461 0.0360 0.027 Uiso 1 1 calc R U . . .
C11 C 1.1218(3) 0.64860(16) 0.05452(11) 0.0250(7) Uani 1 1 d . U . . .
C12 C 1.2309(3) 0.68577(18) 0.03600(13) 0.0329(8) Uani 1 1 d . U . . .
H12A H 1.2641 0.6697 0.0020 0.049 Uiso 1 1 calc R U . . .
H12B H 1.2766 0.6736 0.0616 0.049 Uiso 1 1 calc R U . . .
H12C H 1.2215 0.7377 0.0326 0.049 Uiso 1 1 calc R U . . .
C13 C 1.0550(3) 0.66345(19) 0.01221(12) 0.0334(8) Uani 1 1 d . U . . .
H13A H 1.0949 0.6498 -0.0214 0.050 Uiso 1 1 calc R U . . .
H13B H 1.0386 0.7145 0.0092 0.050 Uiso 1 1 calc R U . . .
H13C H 0.9887 0.6355 0.0216 0.050 Uiso 1 1 calc R U . . .
C14 C 1.2698(2) 0.49551(16) 0.10805(12) 0.0240(6) Uani 1 1 d . U . . .
H14A H 1.3269 0.5057 0.1274 0.029 Uiso 1 1 calc R U . . .
H14B H 1.3039 0.4891 0.0714 0.029 Uiso 1 1 calc R U . . .
C15 C 1.0115(3) 0.46240(16) 0.07139(11) 0.0227(6) Uani 1 1 d . U . . .
H15A H 1.0506 0.4570 0.0354 0.027 Uiso 1 1 calc R U . . .
H15B H 0.9348 0.4558 0.0713 0.027 Uiso 1 1 calc R U . . .
C16 C 1.2292(2) 0.40223(17) 0.18043(12) 0.0232(6) Uani 1 1 d . U . . .
C17 C 1.1579(2) 0.38833(16) 0.09943(12) 0.0215(6) Uani 1 1 d . U . . .
H17 H 1.1900 0.4006 0.0618 0.026 Uiso 1 1 calc R U . . .
C18 C 0.9700(2) 0.36799(16) 0.14379(11) 0.0195(6) Uani 1 1 d . U . . .
C19 C 1.1197(2) 0.29767(16) 0.16942(11) 0.0203(6) Uani 1 1 d . U . . .
H19 H 1.1237 0.2457 0.1810 0.024 Uiso 1 1 calc R U . . .
C20 C 1.1695(2) 0.30837(16) 0.11137(11) 0.0227(6) Uani 1 1 d . U . . .
C21 C 1.2868(3) 0.28609(18) 0.10136(13) 0.0296(7) Uani 1 1 d . U . . .
H21A H 1.2915 0.2346 0.1106 0.044 Uiso 1 1 calc R U . . .
H21B H 1.3258 0.3125 0.1228 0.044 Uiso 1 1 calc R U . . .
H21C H 1.3178 0.2969 0.0642 0.044 Uiso 1 1 calc R U . . .
C22 C 1.1101(3) 0.26505(17) 0.07822(12) 0.0266(7) Uani 1 1 d . U . . .
H22A H 1.1195 0.2138 0.0867 0.040 Uiso 1 1 calc R U . . .
H22B H 1.1385 0.2773 0.0410 0.040 Uiso 1 1 calc R U . . .
H22C H 1.0342 0.2763 0.0858 0.040 Uiso 1 1 calc R U . . .
C23 C 1.1964(2) 0.30421(17) 0.24975(12) 0.0244(7) Uani 1 1 d . U . . .
H23A H 1.2571 0.3283 0.2600 0.029 Uiso 1 1 calc R U . . .
H23B H 1.2161 0.2537 0.2451 0.029 Uiso 1 1 calc R U . . .
C24 C 0.9312(2) 0.27373(16) 0.21477(11) 0.0224(6) Uani 1 1 d . U . . .
H24A H 0.8590 0.2824 0.2072 0.027 Uiso 1 1 calc R U . . .
H24B H 0.9474 0.2227 0.2104 0.027 Uiso 1 1 calc R U . . .
C25 C 1.1084(3) 0.3495(2) 0.33135(13) 0.0328(8) Uani 1 1 d . U . . .
C26 C 1.0157(2) 0.25629(17) 0.29418(12) 0.0252(7) Uani 1 1 d . U . . .
H26 H 1.0437 0.2136 0.2756 0.030 Uiso 1 1 calc R U . . .
C27 C 0.8448(2) 0.32082(17) 0.29684(12) 0.0260(7) Uani 1 1 d . U . . .
C28 C 0.9314(3) 0.30063(17) 0.37409(12) 0.0275(7) Uani 1 1 d . U . . .
H28 H 0.9005 0.2897 0.4121 0.033 Uiso 1 1 calc R U . . .
C29 C 0.9694(3) 0.23082(18) 0.35150(13) 0.0319(7) Uani 1 1 d . U . . .
C30 C 1.0544(3) 0.1952(2) 0.37877(14) 0.0428(9) Uani 1 1 d . U . . .
H30A H 1.0231 0.1802 0.4153 0.064 Uiso 1 1 calc R U . . .
H30B H 1.1127 0.2293 0.3778 0.064 Uiso 1 1 calc R U . . .
H30C H 1.0819 0.1533 0.3607 0.064 Uiso 1 1 calc R U . . .
C31 C 0.8771(3) 0.17723(18) 0.35496(14) 0.0381(8) Uani 1 1 d . U . . .
H31A H 0.8431 0.1667 0.3917 0.057 Uiso 1 1 calc R U . . .
H31B H 0.9046 0.1329 0.3402 0.057 Uiso 1 1 calc R U . . .
H31C H 0.8248 0.1979 0.3351 0.057 Uiso 1 1 calc R U . . .
C32 C 1.0207(3) 0.39820(18) 0.41180(12) 0.0276(7) Uani 1 1 d . U . . .
H32A H 1.0945 0.4153 0.4100 0.033 Uiso 1 1 calc R U . . .
H32B H 0.9984 0.3705 0.4460 0.033 Uiso 1 1 calc R U . . .
C33 C 0.7565(3) 0.36498(17) 0.37949(13) 0.0293(7) Uani 1 1 d . U . . .
H33A H 0.6955 0.3648 0.3611 0.035 Uiso 1 1 calc R U . . .
H33B H 0.7355 0.3363 0.4134 0.035 Uiso 1 1 calc R U . . .
C34 C 0.9978(2) 0.52582(18) 0.39044(11) 0.0249(7) Uani 1 1 d . U . . .
C35 C 0.8383(3) 0.45079(18) 0.43052(12) 0.0272(7) Uani 1 1 d . U . . .
H35 H 0.8283 0.4087 0.4571 0.033 Uiso 1 1 calc R U . . .
C36 C 0.7389(2) 0.49337(16) 0.36123(13) 0.0242(6) Uani 1 1 d . U . . .
C37 C 0.8176(2) 0.57664(17) 0.41293(11) 0.0233(6) Uani 1 1 d . U . . .
H37 H 0.7918 0.6228 0.4272 0.028 Uiso 1 1 calc R U . . .
C38 C 0.7952(3) 0.51747(17) 0.45781(12) 0.0282(7) Uani 1 1 d . U . . .
C39 C 0.8532(3) 0.5307(2) 0.50194(12) 0.0357(8) Uani 1 1 d . U . . .
H39A H 0.8253 0.5738 0.5184 0.054 Uiso 1 1 calc R U . . .
H39B H 0.9293 0.5373 0.4878 0.054 Uiso 1 1 calc R U . . .
H39C H 0.8424 0.4896 0.5281 0.054 Uiso 1 1 calc R U . . .
C40 C 0.6767(3) 0.51012(19) 0.48088(14) 0.0364(8) Uani 1 1 d . U . . .
H40A H 0.6516 0.5543 0.4966 0.055 Uiso 1 1 calc R U . . .
H40B H 0.6650 0.4699 0.5078 0.055 Uiso 1 1 calc R U . . .
H40C H 0.6375 0.5014 0.4531 0.055 Uiso 1 1 calc R U . . .
C41 C 0.9763(2) 0.65309(16) 0.37070(11) 0.0221(6) Uani 1 1 d . U . . .
H41A H 0.9344 0.6911 0.3891 0.027 Uiso 1 1 calc R U . . .
H41B H 1.0500 0.6568 0.3769 0.027 Uiso 1 1 calc R U . . .
C42 C 0.7257(2) 0.62028(16) 0.33920(11) 0.0200(6) Uani 1 1 d . U . . .
H42A H 0.6594 0.6064 0.3280 0.024 Uiso 1 1 calc R U . . .
H42B H 0.7101 0.6625 0.3597 0.024 Uiso 1 1 calc R U . . .
C43 C 0.5660(2) 0.76828(15) 0.28202(11) 0.0202(6) Uani 1 1 d . U . . .
C44 C 0.4310(2) 0.73894(16) 0.23771(11) 0.0185(6) Uani 1 1 d . U . . .
H44 H 0.4245 0.6891 0.2274 0.022 Uiso 1 1 calc R U . . .
C45 C 0.2861(2) 0.81631(15) 0.24521(11) 0.0177(6) Uani 1 1 d . U . . .
C46 C 0.3829(2) 0.74448(16) 0.29640(11) 0.0185(6) Uani 1 1 d . U . . .
H46 H 0.3526 0.6975 0.3135 0.022 Uiso 1 1 calc R U . . .
C47 C 0.4688(2) 0.76544(16) 0.37417(11) 0.0223(6) Uani 1 1 d . U . . .
H47A H 0.5416 0.7575 0.3811 0.027 Uiso 1 1 calc R U . . .
H47B H 0.4240 0.7245 0.3918 0.027 Uiso 1 1 calc R U . . .
C48 C 0.2229(2) 0.80828(17) 0.34141(11) 0.0209(6) Uani 1 1 d . U . . .
H48A H 0.2075 0.7619 0.3625 0.025 Uiso 1 1 calc R U . . .
H48B H 0.1561 0.8248 0.3306 0.025 Uiso 1 1 calc R U . . .
C49 C 0.4960(2) 0.88751(16) 0.39435(11) 0.0219(6) Uani 1 1 d . U . . .
C50 C 0.3129(2) 0.83554(17) 0.41601(11) 0.0223(6) Uani 1 1 d . U . . .
H50 H 0.2845 0.7871 0.4309 0.027 Uiso 1 1 calc R U . . .
C51 C 0.2422(2) 0.93117(17) 0.36076(11) 0.0219(6) Uani 1 1 d . U . . .
C52 C 0.3388(2) 0.95768(17) 0.43145(11) 0.0215(6) Uani 1 1 d . U . . .
H52 H 0.3288 0.9949 0.4573 0.026 Uiso 1 1 calc R U . . .
C53 C 0.2915(2) 0.88677(17) 0.45929(11) 0.0239(6) Uani 1 1 d . U . . .
C54 C 0.3473(3) 0.86217(18) 0.50491(12) 0.0291(7) Uani 1 1 d . U . . .
H54A H 0.3271 0.8934 0.5334 0.044 Uiso 1 1 calc R U . . .
H54B H 0.4245 0.8647 0.4928 0.044 Uiso 1 1 calc R U . . .
H54C H 0.3259 0.8128 0.5175 0.044 Uiso 1 1 calc R U . . .
C55 C 0.1717(3) 0.89214(19) 0.48140(13) 0.0310(7) Uani 1 1 d . U . . .
H55A H 0.1608 0.9251 0.5092 0.046 Uiso 1 1 calc R U . . .
H55B H 0.1434 0.8447 0.4958 0.046 Uiso 1 1 calc R U . . .
H55C H 0.1348 0.9100 0.4533 0.046 Uiso 1 1 calc R U . . .
C56 C 0.5219(2) 1.01107(16) 0.41215(11) 0.0210(6) Uani 1 1 d . U . . .
H56A H 0.5952 0.9935 0.4113 0.025 Uiso 1 1 calc R U . . .
H56B H 0.4996 1.0334 0.4455 0.025 Uiso 1 1 calc R U . . .
C57 C 0.2612(2) 1.05655(16) 0.37774(11) 0.0214(6) Uani 1 1 d . U . . .
H57A H 0.2001 1.0613 0.3594 0.026 Uiso 1 1 calc R U . . .
H57B H 0.2410 1.0786 0.4114 0.026 Uiso 1 1 calc R U . . .
C58 C 0.6100(2) 1.06973(17) 0.32843(12) 0.0231(6) Uani 1 1 d . U . . .
C59 C 0.4369(2) 1.11735(16) 0.37227(11) 0.0219(6) Uani 1 1 d . U . . .
H59 H 0.4061 1.1212 0.4101 0.026 Uiso 1 1 calc R U . . .
C60 C 0.3481(2) 1.11804(16) 0.29499(11) 0.0213(6) Uani 1 1 d . U . . .
C61 C 0.5242(2) 1.17687(16) 0.29144(11) 0.0220(6) Uani 1 1 d . U . . .
H61 H 0.5547 1.2228 0.2726 0.026 Uiso 1 1 calc R U . . .
C62 C 0.4798(3) 1.19083(16) 0.34849(12) 0.0242(6) Uani 1 1 d . U . . .
C63 C 0.5681(3) 1.21751(18) 0.37461(13) 0.0329(8) Uani 1 1 d . U . . .
H63A H 0.6034 1.2594 0.3537 0.049 Uiso 1 1 calc R U . . .
H63B H 0.6201 1.1795 0.3770 0.049 Uiso 1 1 calc R U . . .
H63C H 0.5374 1.2307 0.4098 0.049 Uiso 1 1 calc R U . . .
C64 C 0.3928(3) 1.24712(18) 0.35180(13) 0.0347(8) Uani 1 1 d . U . . .
H64A H 0.4227 1.2925 0.3339 0.052 Uiso 1 1 calc R U . . .
H64B H 0.3641 1.2538 0.3886 0.052 Uiso 1 1 calc R U . . .
H64C H 0.3357 1.2312 0.3349 0.052 Uiso 1 1 calc R U . . .
C65 C 0.7028(2) 1.13434(17) 0.24825(11) 0.0215(6) Uani 1 1 d . U . . .
H65A H 0.7614 1.1058 0.2591 0.026 Uiso 1 1 calc R U . . .
H65B H 0.7250 1.1853 0.2445 0.026 Uiso 1 1 calc R U . . .
C66 C 0.4387(2) 1.17878(16) 0.21194(11) 0.0204(6) Uani 1 1 d . U . . .
H66A H 0.3667 1.1723 0.2042 0.025 Uiso 1 1 calc R U . . .
H66B H 0.4559 1.2306 0.2068 0.025 Uiso 1 1 calc R U . . .
C67 C 0.7362(2) 1.05403(16) 0.17787(11) 0.0202(6) Uani 1 1 d . U . . .
C68 C 0.6276(2) 1.16247(16) 0.16701(11) 0.0205(6) Uani 1 1 d . U . . .
H68 H 0.6324 1.2117 0.1786 0.025 Uiso 1 1 calc R U . . .
C69 C 0.4770(2) 1.09757(16) 0.14306(11) 0.0201(6) Uani 1 1 d . U . . .
C70 C 0.6636(2) 1.08658(16) 0.09693(11) 0.0209(6) Uani 1 1 d . U . . .
H70 H 0.6947 1.0824 0.0592 0.025 Uiso 1 1 calc R U . . .
C71 C 0.6768(2) 1.16397(16) 0.10897(11) 0.0211(6) Uani 1 1 d . U . . .
C72 C 0.7943(3) 1.18736(18) 0.09838(12) 0.0278(7) Uani 1 1 d . U . . .
H72A H 0.8245 1.1847 0.0612 0.042 Uiso 1 1 calc R U . . .
H72B H 0.8336 1.1556 0.1196 0.042 Uiso 1 1 calc R U . . .
H72C H 0.7998 1.2367 0.1077 0.042 Uiso 1 1 calc R U . . .
C73 C 0.6175(3) 1.21566(17) 0.07605(12) 0.0256(7) Uani 1 1 d . U . . .
H73A H 0.6422 1.2095 0.0388 0.038 Uiso 1 1 calc R U . . .
H73B H 0.6313 1.2650 0.0829 0.038 Uiso 1 1 calc R U . . .
H73C H 0.5409 1.2054 0.0854 0.038 Uiso 1 1 calc R U . . .
C74 C 0.7724(2) 0.97631(16) 0.10601(12) 0.0214(6) Uani 1 1 d . U . . .
H74A H 0.8306 0.9615 0.1246 0.026 Uiso 1 1 calc R U . . .
H74B H 0.8047 0.9898 0.0690 0.026 Uiso 1 1 calc R U . . .
C75 C 0.5156(2) 1.02035(15) 0.07050(11) 0.0196(6) Uani 1 1 d . U . . .
H75A H 0.4394 1.0289 0.0700 0.023 Uiso 1 1 calc R U . . .
H75B H 0.5557 1.0325 0.0346 0.023 Uiso 1 1 calc R U . . .
C76 C 0.7031(2) 0.85908(16) 0.14548(12) 0.0214(6) Uani 1 1 d . U . . .
C77 C 0.6342(2) 0.91317(16) 0.06828(11) 0.0192(6) Uani 1 1 d . U . . .
H77 H 0.6714 0.9407 0.0356 0.023 Uiso 1 1 calc R U . . .
C78 C 0.4431(2) 0.90550(15) 0.11164(11) 0.0174(6) Uani 1 1 d . U . . .
C79 C 0.5632(2) 0.80033(16) 0.10858(11) 0.0199(6) Uani 1 1 d . U . . .
H79 H 0.5501 0.7488 0.1043 0.024 Uiso 1 1 calc R U . . .
C80 C 0.6198(2) 0.83564(16) 0.05611(11) 0.0217(6) Uani 1 1 d . U . . .
C81 C 0.7274(2) 0.80023(18) 0.03763(12) 0.0264(7) Uani 1 1 d . U . . .
H81A H 0.7157 0.7497 0.0330 0.040 Uiso 1 1 calc R U . . .
H81B H 0.7724 0.8038 0.0639 0.040 Uiso 1 1 calc R U . . .
H81C H 0.7625 0.8246 0.0042 0.040 Uiso 1 1 calc R U . . .
C82 C 0.5528(2) 0.82944(17) 0.01404(11) 0.0242(7) Uani 1 1 d . U . . .
H82A H 0.5396 0.7788 0.0104 0.036 Uiso 1 1 calc R U . . .
H82B H 0.5908 0.8520 -0.0194 0.036 Uiso 1 1 calc R U . . .
H82C H 0.4848 0.8535 0.0241 0.036 Uiso 1 1 calc R U . . .
C83 C 0.6232(2) 0.74790(16) 0.18949(11) 0.0205(6) Uani 1 1 d . U . . .
H83A H 0.6084 0.7019 0.1759 0.025 Uiso 1 1 calc R U . . .
H83B H 0.6924 0.7436 0.2012 0.025 Uiso 1 1 calc R U . . .
C84 C 0.3712(2) 0.79205(15) 0.15512(11) 0.0182(6) Uani 1 1 d . U . . .
H84A H 0.3038 0.8127 0.1476 0.022 Uiso 1 1 calc R U . . .
H84B H 0.3757 0.7428 0.1438 0.022 Uiso 1 1 calc R U . . .

loop_
 _atom_site_aniso_label
 _atom_site_aniso_U_11
 _atom_site_aniso_U_22
 _atom_site_aniso_U_33
 _atom_site_aniso_U_23
 _atom_site_aniso_U_13
 _atom_site_aniso_U_12
O1 0.0167(10) 0.0309(12) 0.0267(11) -0.0009(9) -0.0094(9) -0.0007(9)
O2 0.0187(10) 0.0214(11) 0.0270(11) -0.0035(9) -0.0069(9) -0.0013(8)
O3 0.0275(11) 0.0290(12) 0.0239(11) -0.0014(9) -0.0075(9) -0.0008(9)
O4 0.0214(11) 0.0221(12) 0.0552(15) -0.0093(11) -0.0026(10) -0.0035(9)
O5 0.0301(12) 0.0386(14) 0.0324(12) -0.0040(10) -0.0087(10) -0.0093(10)
O6 0.0238(11) 0.0314(13) 0.0330(12) 0.0071(10) -0.0031(9) 0.0063(9)
O7 0.0241(14) 0.123(3) 0.074(2) -0.067(2) -0.0004(14) -0.0025(15)
O8 0.0264(12) 0.0511(16) 0.0350(13) 0.0085(11) -0.0004(10) 0.0152(11)
O9 0.0258(12) 0.0407(15) 0.0317(12) 0.0050(10) -0.0015(10) 0.0075(10)
O10 0.0298(12) 0.0215(12) 0.0640(16) -0.0039(11) -0.0235(12) 0.0011(10)
O11 0.0191(10) 0.0245(12) 0.0291(11) 0.0011(9) -0.0095(9) 0.0007(8)
O12 0.0198(10) 0.0240(11) 0.0217(10) -0.0018(8) -0.0069(8) 0.0039(8)
O13 0.0244(11) 0.0242(12) 0.0412(13) -0.0051(10) -0.0046(10) 0.0035(9)
O14 0.0300(12) 0.0307(13) 0.0273(11) -0.0016(9) -0.0129(10) 0.0073(10)
O15 0.0268(12) 0.0364(14) 0.0356(13) 0.0087(10) -0.0004(10) 0.0115(10)
O16 0.0238(11) 0.0392(14) 0.0229(11) 0.0020(10) -0.0078(9) 0.0006(10)
O17 0.0259(11) 0.0274(12) 0.0298(12) -0.0020(9) -0.0111(9) 0.0046(9)
O18 0.0206(11) 0.0340(13) 0.0323(12) -0.0129(10) -0.0027(9) -0.0017(9)
O19 0.0223(11) 0.0280(12) 0.0264(11) 0.0000(9) -0.0088(9) 0.0000(9)
O20 0.0195(10) 0.0203(11) 0.0340(12) 0.0009(9) 0.0004(9) 0.0026(8)
N1 0.0177(12) 0.0234(14) 0.0189(12) 0.0028(10) -0.0059(9) 0.0005(10)
N2 0.0174(12) 0.0168(13) 0.0224(12) -0.0008(10) -0.0031(10) 0.0006(9)
N3 0.0190(12) 0.0184(13) 0.0215(12) 0.0010(10) -0.0063(10) -0.0018(10)
N4 0.0168(11) 0.0231(13) 0.0162(11) 0.0001(10) -0.0037(9) -0.0006(10)
N5 0.0223(12) 0.0184(13) 0.0202(12) -0.0010(10) -0.0019(10) -0.0034(10)
N6 0.0218(12) 0.0165(12) 0.0180(12) -0.0017(9) -0.0029(10) -0.0017(9)
N7 0.0246(12) 0.0153(12) 0.0217(12) -0.0017(10) -0.0043(10) -0.0028(10)
N8 0.0225(12) 0.0210(13) 0.0195(12) -0.0028(10) -0.0014(10) 0.0003(10)
N9 0.0239(13) 0.0206(13) 0.0244(13) -0.0019(10) -0.0016(10) -0.0019(10)
N10 0.0249(12) 0.0184(13) 0.0185(12) 0.0019(10) -0.0054(10) 0.0022(10)
N11 0.0217(12) 0.0184(13) 0.0203(12) -0.0013(10) -0.0029(10) 0.0009(10)
N12 0.0243(13) 0.0232(14) 0.0216(12) -0.0016(10) -0.0048(10) -0.0007(10)
N13 0.0224(13) 0.0264(14) 0.0244(13) 0.0000(11) -0.0032(10) 0.0073(10)
N14 0.0212(12) 0.0222(14) 0.0242(13) 0.0048(10) -0.0034(10) 0.0060(10)
N15 0.0254(13) 0.0181(13) 0.0285(13) 0.0041(10) 0.0017(11) 0.0063(10)
N16 0.0296(14) 0.0290(15) 0.0232(13) -0.0013(11) -0.0022(11) 0.0108(11)
N17 0.0288(13) 0.0256(14) 0.0208(13) 0.0023(10) -0.0031(11) 0.0075(11)
N18 0.0273(13) 0.0154(13) 0.0285(13) 0.0016(10) -0.0017(11) 0.0022(10)
N19 0.0216(12) 0.0187(13) 0.0212(12) 0.0032(10) -0.0033(10) 0.0023(10)
N20 0.0238(12) 0.0241(14) 0.0198(12) 0.0025(10) -0.0046(10) 0.0037(10)
N21 0.0168(11) 0.0208(13) 0.0212(12) -0.0008(10) -0.0044(9) 0.0015(10)
N22 0.0177(11) 0.0180(13) 0.0198(12) -0.0011(9) -0.0039(9) 0.0013(9)
N23 0.0166(11) 0.0235(14) 0.0184(12) 0.0019(10) -0.0045(9) 0.0024(10)
N24 0.0173(12) 0.0260(14) 0.0201(12) -0.0031(10) -0.0078(10) 0.0006(10)
N25 0.0229(12) 0.0228(13) 0.0227(13) -0.0041(10) -0.0079(10) 0.0023(10)
N26 0.0227(13) 0.0201(13) 0.0250(13) -0.0018(10) -0.0093(10) 0.0015(10)
N27 0.0208(12) 0.0216(13) 0.0221(12) -0.0026(10) -0.0059(10) 0.0044(10)
N28 0.0203(12) 0.0207(13) 0.0231(13) -0.0024(10) -0.0059(10) 0.0027(10)
N29 0.0249(13) 0.0231(14) 0.0182(12) 0.0012(10) -0.0054(10) 0.0016(10)
N30 0.0234(12) 0.0244(14) 0.0195(12) -0.0013(10) -0.0053(10) 0.0025(10)
N31 0.0236(12) 0.0221(13) 0.0175(12) -0.0010(10) -0.0064(10) 0.0005(10)
N32 0.0217(12) 0.0230(13) 0.0182(12) 0.0011(10) -0.0057(10) -0.0001(10)
N33 0.0225(12) 0.0202(13) 0.0188(12) -0.0002(10) -0.0062(10) -0.0004(10)
N34 0.0231(12) 0.0192(13) 0.0173(12) 0.0002(10) -0.0047(10) 0.0004(10)
N35 0.0184(12) 0.0199(13) 0.0170(11) 0.0002(10) -0.0034(9) -0.0016(9)
N36 0.0204(12) 0.0190(13) 0.0211(12) 0.0014(10) -0.0044(10) -0.0008(10)
N37 0.0195(12) 0.0200(13) 0.0214(12) -0.0004(10) -0.0049(10) -0.0011(10)
N38 0.0185(12) 0.0148(12) 0.0217(12) 0.0008(9) -0.0037(10) 0.0012(9)
N39 0.0183(11) 0.0142(12) 0.0177(12) 0.0002(9) -0.0014(9) 0.0006(9)
N40 0.0184(12) 0.0184(13) 0.0214(12) -0.0003(10) -0.0038(10) 0.0015(9)
C1 0.0212(14) 0.0160(15) 0.0231(14) -0.0032(11) -0.0043(11) -0.0009(11)
C2 0.0185(13) 0.0158(14) 0.0213(14) 0.0004(11) -0.0075(11) -0.0008(11)
C3 0.0170(13) 0.0121(14) 0.0207(13) 0.0005(11) -0.0049(11) 0.0034(10)
C4 0.0220(14) 0.0145(14) 0.0182(13) -0.0009(11) -0.0059(11) 0.0028(11)
C5 0.0196(14) 0.0169(15) 0.0226(14) -0.0002(11) -0.0031(11) -0.0045(11)
C6 0.0231(14) 0.0160(15) 0.0201(14) -0.0010(11) -0.0077(11) 0.0047(11)
C7 0.0208(14) 0.0215(15) 0.0210(14) 0.0011(12) 0.0016(12) -0.0045(11)
C8 0.0242(14) 0.0177(15) 0.0191(14) 0.0010(11) -0.0035(11) -0.0031(11)
C9 0.0264(15) 0.0160(14) 0.0186(14) 0.0025(11) -0.0084(12) 0.0005(11)
C10 0.0282(15) 0.0221(16) 0.0172(14) -0.0034(11) -0.0003(12) -0.0030(12)
C11 0.0369(17) 0.0187(16) 0.0176(14) 0.0018(11) -0.0019(12) -0.0040(13)
C12 0.0444(19) 0.0253(18) 0.0234(16) 0.0009(13) 0.0069(14) -0.0115(15)
C13 0.051(2) 0.0254(18) 0.0224(16) 0.0010(13) -0.0059(15) -0.0015(15)
C14 0.0214(15) 0.0215(16) 0.0270(16) -0.0032(12) 0.0017(12) 0.0016(12)
C15 0.0341(17) 0.0171(15) 0.0183(14) 0.0003(11) -0.0090(13) 0.0024(12)
C16 0.0191(14) 0.0258(16) 0.0248(15) -0.0059(12) -0.0025(12) 0.0008(12)
C17 0.0217(14) 0.0221(15) 0.0202(14) -0.0032(11) -0.0021(12) 0.0007(11)
C18 0.0256(15) 0.0185(15) 0.0146(13) -0.0046(11) -0.0035(11) 0.0034(11)
C19 0.0209(14) 0.0183(15) 0.0221(14) -0.0018(11) -0.0048(11) 0.0038(11)
C20 0.0283(15) 0.0196(15) 0.0192(14) -0.0016(11) -0.0014(12) 0.0016(12)
C21 0.0299(16) 0.0277(18) 0.0290(17) -0.0033(14) 0.0000(14) 0.0081(13)
C22 0.0375(18) 0.0188(16) 0.0231(15) -0.0034(12) -0.0036(13) 0.0034(13)
C23 0.0201(14) 0.0281(17) 0.0250(15) -0.0010(12) -0.0050(12) 0.0083(12)
C24 0.0216(15) 0.0189(16) 0.0259(15) 0.0022(12) -0.0037(12) 0.0000(12)
C25 0.0242(16) 0.047(2) 0.0312(17) -0.0095(15) -0.0120(13) 0.0133(14)
C26 0.0278(15) 0.0190(16) 0.0272(16) 0.0032(12) -0.0036(12) 0.0072(12)
C27 0.0237(15) 0.0203(16) 0.0295(16) 0.0084(12) 0.0022(12) 0.0031(12)
C28 0.0334(16) 0.0237(16) 0.0223(15) 0.0034(12) 0.0004(13) 0.0090(13)
C29 0.0411(18) 0.0238(17) 0.0277(16) 0.0053(13) -0.0017(14) 0.0132(14)
C30 0.066(2) 0.032(2) 0.0308(19) 0.0027(15) -0.0131(18) 0.0244(18)
C31 0.054(2) 0.0202(17) 0.0338(19) 0.0028(14) 0.0047(16) 0.0071(15)
C32 0.0347(17) 0.0286(17) 0.0206(15) -0.0003(12) -0.0088(13) 0.0139(14)
C33 0.0278(16) 0.0167(16) 0.0380(18) 0.0027(13) 0.0059(14) -0.0003(12)
C34 0.0272(16) 0.0309(17) 0.0159(14) 0.0004(12) -0.0033(12) 0.0073(12)
C35 0.0302(16) 0.0250(17) 0.0229(15) 0.0037(12) 0.0018(13) 0.0040(13)
C36 0.0182(14) 0.0182(15) 0.0346(17) 0.0003(12) -0.0021(13) 0.0004(11)
C37 0.0262(15) 0.0214(16) 0.0214(14) 0.0007(12) -0.0034(12) 0.0047(12)
C38 0.0352(17) 0.0238(17) 0.0221(15) 0.0009(12) 0.0023(13) 0.0084(13)
C39 0.052(2) 0.036(2) 0.0186(15) 0.0006(14) -0.0068(15) 0.0185(16)
C40 0.0390(19) 0.0298(19) 0.0317(18) 0.0021(15) 0.0137(15) 0.0078(15)
C41 0.0217(15) 0.0236(16) 0.0219(14) -0.0006(12) -0.0070(12) 0.0011(12)
C42 0.0178(14) 0.0165(15) 0.0245(14) 0.0011(11) -0.0025(12) 0.0026(11)
C43 0.0220(14) 0.0153(15) 0.0249(14) 0.0023(11) -0.0100(11) 0.0008(11)
C44 0.0187(13) 0.0161(15) 0.0214(14) -0.0003(11) -0.0059(11) 0.0001(11)
C45 0.0175(13) 0.0155(14) 0.0204(14) -0.0017(11) -0.0038(11) -0.0040(11)
C46 0.0186(13) 0.0170(15) 0.0208(14) 0.0002(11) -0.0064(11) -0.0011(11)
C47 0.0252(15) 0.0203(16) 0.0238(15) 0.0015(12) -0.0122(12) 0.0036(12)
C48 0.0164(14) 0.0268(16) 0.0191(14) -0.0024(12) -0.0020(11) -0.0003(12)
C49 0.0269(15) 0.0192(15) 0.0217(15) -0.0013(12) -0.0103(12) 0.0039(11)
C50 0.0204(14) 0.0255(16) 0.0213(14) -0.0007(12) -0.0056(11) 0.0020(12)
C51 0.0191(14) 0.0286(16) 0.0177(14) -0.0024(12) -0.0027(12) 0.0051(12)
C52 0.0228(14) 0.0241(16) 0.0184(14) -0.0013(12) -0.0062(11) 0.0038(12)
C53 0.0272(15) 0.0241(16) 0.0208(14) -0.0014(12) -0.0055(12) -0.0010(12)
C54 0.0391(18) 0.0266(18) 0.0230(16) -0.0008(13) -0.0101(14) -0.0015(14)
C55 0.0320(17) 0.036(2) 0.0241(16) -0.0045(14) -0.0030(13) 0.0002(14)
C56 0.0252(15) 0.0217(15) 0.0176(14) -0.0029(11) -0.0077(12) 0.0010(12)
C57 0.0174(14) 0.0274(16) 0.0195(14) -0.0022(12) -0.0036(11) 0.0049(12)
C58 0.0255(15) 0.0225(16) 0.0220(15) 0.0001(12) -0.0067(12) -0.0036(12)
C59 0.0263(15) 0.0223(15) 0.0189(14) -0.0021(11) -0.0088(12) 0.0023(12)
C60 0.0243(15) 0.0218(16) 0.0188(14) -0.0023(11) -0.0070(12) 0.0037(12)
C61 0.0273(15) 0.0184(15) 0.0219(14) -0.0017(11) -0.0085(12) -0.0020(12)
C62 0.0344(17) 0.0182(15) 0.0212(15) -0.0003(12) -0.0086(13) -0.0008(12)
C63 0.052(2) 0.0226(18) 0.0281(17) -0.0044(14) -0.0161(15) -0.0044(15)
C64 0.052(2) 0.0237(18) 0.0300(18) -0.0075(14) -0.0100(16) 0.0136(15)
C65 0.0224(15) 0.0232(16) 0.0185(14) -0.0006(12) -0.0033(11) -0.0079(12)
C66 0.0263(15) 0.0161(15) 0.0202(14) -0.0004(11) -0.0083(12) 0.0042(12)
C67 0.0156(13) 0.0221(15) 0.0224(14) 0.0017(11) -0.0036(11) -0.0003(11)
C68 0.0237(14) 0.0170(15) 0.0205(14) 0.0020(11) -0.0046(11) -0.0027(11)
C69 0.0249(15) 0.0176(15) 0.0182(14) 0.0023(11) -0.0064(11) 0.0001(11)
C70 0.0210(14) 0.0226(15) 0.0179(14) 0.0033(11) -0.0026(11) -0.0046(11)
C71 0.0254(15) 0.0190(15) 0.0177(14) 0.0034(11) -0.0032(12) -0.0060(12)
C72 0.0308(17) 0.0254(17) 0.0254(16) 0.0032(13) -0.0027(13) -0.0123(13)
C73 0.0352(17) 0.0181(16) 0.0220(15) 0.0028(12) -0.0034(13) -0.0030(13)
C74 0.0181(14) 0.0206(15) 0.0239(15) -0.0003(12) -0.0004(12) -0.0015(11)
C75 0.0235(15) 0.0171(15) 0.0180(14) 0.0005(11) -0.0045(12) -0.0004(11)
C76 0.0191(14) 0.0214(15) 0.0230(14) -0.0038(12) -0.0016(12) 0.0039(11)
C77 0.0189(14) 0.0204(15) 0.0169(13) -0.0009(11) -0.0001(11) 0.0007(11)
C78 0.0187(13) 0.0178(14) 0.0161(13) -0.0039(11) -0.0033(11) 0.0004(11)
C79 0.0201(14) 0.0190(15) 0.0211(14) -0.0026(11) -0.0051(11) 0.0017(11)
C80 0.0232(15) 0.0193(15) 0.0213(14) -0.0011(11) -0.0013(12) 0.0028(12)
C81 0.0280(16) 0.0278(18) 0.0229(15) -0.0054(13) -0.0019(13) 0.0044(13)
C82 0.0321(17) 0.0211(16) 0.0194(14) -0.0059(12) -0.0027(13) 0.0010(13)
C83 0.0158(13) 0.0175(15) 0.0272(15) 0.0000(12) -0.0026(11) 0.0036(11)
C84 0.0209(14) 0.0156(15) 0.0189(13) 0.0012(11) -0.0066(11) -0.0012(11)

_geom_special_details
;
 All esds (except the esd in the dihedral angle between two l.s. planes)
 are estimated using the full covariance matrix.  The cell esds are taken
 into account individually in the estimation of esds in distances, angles
 and torsion angles; correlations between esds in cell parameters are only
 used when they are defined by crystal symmetry.  An approximate (isotropic)
 treatment of cell esds is used for estimating esds involving l.s. planes.
;
                                     
loop_
 _geom_bond_atom_site_label_1
 _geom_bond_atom_site_label_2
 _geom_bond_distance
 _geom_bond_site_symmetry_2
 _geom_bond_publ_flag
O1 C1 1.224(4) . ?
O2 C3 1.222(3) . ?
O3 C7 1.232(4) . ?
O4 C9 1.227(4) . ?
O5 C16 1.233(4) . ?
O6 C18 1.232(4) . ?
O7 C25 1.225(4) . ?
O8 C27 1.234(4) . ?
O9 C34 1.229(4) . ?
O10 C36 1.237(4) . ?
O11 C43 1.225(3) . ?
O12 C45 1.229(3) . ?
O13 C49 1.234(4) . ?
O14 C51 1.236(4) . ?
O15 C58 1.227(4) . ?
O16 C60 1.229(4) . ?
O17 C67 1.236(4) . ?
O18 C69 1.235(4) . ?
O19 C76 1.230(4) . ?
O20 C78 1.232(3) . ?
N1 C1 1.368(4) . ?
N1 C41 1.433(4) . ?
N1 C2 1.458(4) . ?
N2 C3 1.365(4) . ?
N2 C2 1.444(4) . ?
N2 C42 1.445(4) . ?
N3 C3 1.376(4) . ?
N3 C6 1.445(4) . ?
N3 C4 1.449(4) . ?
N4 C1 1.376(4) . ?
N4 C5 1.442(4) . ?
N4 C4 1.450(4) . ?
N5 C7 1.374(4) . ?
N5 C8 1.457(4) . ?
N5 C5 1.460(4) . ?
N6 C9 1.369(4) . ?
N6 C6 1.458(4) . ?
N6 C8 1.461(4) . ?
N7 C9 1.374(4) . ?
N7 C15 1.451(4) . ?
N7 C10 1.461(4) . ?
N8 C7 1.375(4) . ?
N8 C14 1.456(4) . ?
N8 C10 1.464(4) . ?
N9 C16 1.373(4) . ?
N9 C17 1.464(4) . ?
N9 C14 1.470(4) . ?
N10 C18 1.376(4) . ?
N10 C17 1.463(4) . ?
N10 C15 1.468(4) . ?
N11 C18 1.368(4) . ?
N11 C24 1.458(4) . ?
N11 C19 1.466(4) . ?
N12 C16 1.374(4) . ?
N12 C19 1.455(4) . ?
N12 C23 1.457(4) . ?
N13 C25 1.364(4) . ?
N13 C26 1.461(4) . ?
N13 C23 1.462(4) . ?
N14 C27 1.379(4) . ?
N14 C24 1.455(4) . ?
N14 C26 1.468(4) . ?
N15 C27 1.367(4) . ?
N15 C28 1.467(4) . ?
N15 C33 1.468(4) . ?
N16 C25 1.373(4) . ?
N16 C32 1.458(4) . ?
N16 C28 1.459(4) . ?
N17 C34 1.379(4) . ?
N17 C32 1.460(4) . ?
N17 C35 1.462(4) . ?
N18 C36 1.371(4) . ?
N18 C33 1.447(4) . ?
N18 C35 1.471(4) . ?
N19 C36 1.372(4) . ?
N19 C42 1.451(4) . ?
N19 C37 1.455(4) . ?
N20 C34 1.369(4) . ?
N20 C37 1.457(4) . ?
N20 C41 1.461(4) . ?
N21 C43 1.369(4) . ?
N21 C83 1.437(4) . ?
N21 C44 1.455(4) . ?
N22 C45 1.371(4) . ?
N22 C84 1.447(4) . ?
N22 C44 1.451(4) . ?
N23 C45 1.368(4) . ?
N23 C46 1.443(4) . ?
N23 C48 1.445(4) . ?
N24 C43 1.385(4) . ?
N24 C47 1.441(4) . ?
N24 C46 1.448(4) . ?
N25 C49 1.376(4) . ?
N25 C47 1.447(4) . ?
N25 C50 1.471(4) . ?
N26 C51 1.368(4) . ?
N26 C50 1.461(4) . ?
N26 C48 1.464(4) . ?
N27 C51 1.365(4) . ?
N27 C57 1.474(4) . ?
N27 C52 1.479(4) . ?
N28 C49 1.373(4) . ?
N28 C56 1.451(4) . ?
N28 C52 1.460(4) . ?
N29 C58 1.375(4) . ?
N29 C56 1.461(4) . ?
N29 C59 1.464(4) . ?
N30 C60 1.369(4) . ?
N30 C57 1.456(4) . ?
N30 C59 1.467(4) . ?
N31 C60 1.385(4) . ?
N31 C66 1.459(4) . ?
N31 C61 1.468(4) . ?
N32 C58 1.391(4) . ?
N32 C65 1.446(4) . ?
N32 C61 1.461(4) . ?
N33 C67 1.361(4) . ?
N33 C65 1.465(4) . ?
N33 C68 1.468(4) . ?
N34 C69 1.365(4) . ?
N34 C66 1.454(4) . ?
N34 C68 1.473(4) . ?
N35 C69 1.369(4) . ?
N35 C75 1.459(4) . ?
N35 C70 1.464(4) . ?
N36 C67 1.380(4) . ?
N36 C74 1.450(4) . ?
N36 C70 1.467(4) . ?
N37 C76 1.377(4) . ?
N37 C77 1.460(4) . ?
N37 C74 1.467(4) . ?
N38 C78 1.375(4) . ?
N38 C75 1.453(4) . ?
N38 C77 1.469(4) . ?
N39 C78 1.370(4) . ?
N39 C79 1.464(4) . ?
N39 C84 1.468(4) . ?
N40 C76 1.371(4) . ?
N40 C83 1.453(4) . ?
N40 C79 1.461(4) . ?
C2 C4 1.549(4) . ?
C2 H2 1.0000 . ?
C4 H4 1.0000 . ?
C5 H5A 0.9900 . ?
C5 H5B 0.9900 . ?
C6 H6A 0.9900 . ?
C6 H6B 0.9900 . ?
C8 C11 1.524(4) . ?
C8 H8 1.0000 . ?
C10 C11 1.542(4) . ?
C10 H10 1.0000 . ?
C11 C13 1.525(5) . ?
C11 C12 1.540(4) . ?
C12 H12A 0.9800 . ?
C12 H12B 0.9800 . ?
C12 H12C 0.9800 . ?
C13 H13A 0.9800 . ?
C13 H13B 0.9800 . ?
C13 H13C 0.9800 . ?
C14 H14A 0.9900 . ?
C14 H14B 0.9900 . ?
C15 H15A 0.9900 . ?
C15 H15B 0.9900 . ?
C17 C20 1.519(4) . ?
C17 H17 1.0000 . ?
C19 C20 1.526(4) . ?
C19 H19 1.0000 . ?
C20 C22 1.533(4) . ?
C20 C21 1.537(4) . ?
C21 H21A 0.9800 . ?
C21 H21B 0.9800 . ?
C21 H21C 0.9800 . ?
C22 H22A 0.9800 . ?
C22 H22B 0.9800 . ?
C22 H22C 0.9800 . ?
C23 H23A 0.9900 . ?
C23 H23B 0.9900 . ?
C24 H24A 0.9900 . ?
C24 H24B 0.9900 . ?
C26 C29 1.539(4) . ?
C26 H26 1.0000 . ?
C28 C29 1.520(4) . ?
C28 H28 1.0000 . ?
C29 C30 1.531(5) . ?
C29 C31 1.539(5) . ?
C30 H30A 0.9800 . ?
C30 H30B 0.9800 . ?
C30 H30C 0.9800 . ?
C31 H31A 0.9800 . ?
C31 H31B 0.9800 . ?
C31 H31C 0.9800 . ?
C32 H32A 0.9900 . ?
C32 H32B 0.9900 . ?
C33 H33A 0.9900 . ?
C33 H33B 0.9900 . ?
C35 C38 1.538(4) . ?
C35 H35 1.0000 . ?
C37 C38 1.533(4) . ?
C37 H37 1.0000 . ?
C38 C39 1.518(5) . ?
C38 C40 1.526(5) . ?
C39 H39A 0.9800 . ?
C39 H39B 0.9800 . ?
C39 H39C 0.9800 . ?
C40 H40A 0.9800 . ?
C40 H40B 0.9800 . ?
C40 H40C 0.9800 . ?
C41 H41A 0.9900 . ?
C41 H41B 0.9900 . ?
C42 H42A 0.9900 . ?
C42 H42B 0.9900 . ?
C44 C46 1.551(4) . ?
C44 H44 1.0000 . ?
C46 H46 1.0000 . ?
C47 H47A 0.9900 . ?
C47 H47B 0.9900 . ?
C48 H48A 0.9900 . ?
C48 H48B 0.9900 . ?
C50 C53 1.526(4) . ?
C50 H50 1.0000 . ?
C52 C53 1.532(4) . ?
C52 H52 1.0000 . ?
C53 C54 1.538(4) . ?
C53 C55 1.540(4) . ?
C54 H54A 0.9800 . ?
C54 H54B 0.9800 . ?
C54 H54C 0.9800 . ?
C55 H55A 0.9800 . ?
C55 H55B 0.9800 . ?
C55 H55C 0.9800 . ?
C56 H56A 0.9900 . ?
C56 H56B 0.9900 . ?
C57 H57A 0.9900 . ?
C57 H57B 0.9900 . ?
C59 C62 1.525(4) . ?
C59 H59 1.0000 . ?
C61 C62 1.533(4) . ?
C61 H61 1.0000 . ?
C62 C64 1.527(5) . ?
C62 C63 1.530(4) . ?
C63 H63A 0.9800 . ?
C63 H63B 0.9800 . ?
C63 H63C 0.9800 . ?
C64 H64A 0.9800 . ?
C64 H64B 0.9800 . ?
C64 H64C 0.9800 . ?
C65 H65A 0.9900 . ?
C65 H65B 0.9900 . ?
C66 H66A 0.9900 . ?
C66 H66B 0.9900 . ?
C68 C71 1.525(4) . ?
C68 H68 1.0000 . ?
C70 C71 1.526(4) . ?
C70 H70 1.0000 . ?
C71 C73 1.536(4) . ?
C71 C72 1.536(4) . ?
C72 H72A 0.9800 . ?
C72 H72B 0.9800 . ?
C72 H72C 0.9800 . ?
C73 H73A 0.9800 . ?
C73 H73B 0.9800 . ?
C73 H73C 0.9800 . ?
C74 H74A 0.9900 . ?
C74 H74B 0.9900 . ?
C75 H75A 0.9900 . ?
C75 H75B 0.9900 . ?
C77 C80 1.532(4) . ?
C77 H77 1.0000 . ?
C79 C80 1.524(4) . ?
C79 H79 1.0000 . ?
C80 C82 1.525(4) . ?
C80 C81 1.538(4) . ?
C81 H81A 0.9800 . ?
C81 H81B 0.9800 . ?
C81 H81C 0.9800 . ?
C82 H82A 0.9800 . ?
C82 H82B 0.9800 . ?
C82 H82C 0.9800 . ?
C83 H83A 0.9900 . ?
C83 H83B 0.9900 . ?
C84 H84A 0.9900 . ?
C84 H84B 0.9900 . ?

loop_
 _geom_angle_atom_site_label_1
 _geom_angle_atom_site_label_2
 _geom_angle_atom_site_label_3
 _geom_angle
 _geom_angle_site_symmetry_1
 _geom_angle_site_symmetry_3
 _geom_angle_publ_flag
C1 N1 C41 122.4(2) . . ?
C1 N1 C2 112.4(2) . . ?
C41 N1 C2 123.5(2) . . ?
C3 N2 C2 112.1(2) . . ?
C3 N2 C42 122.8(2) . . ?
C2 N2 C42 121.5(2) . . ?
C3 N3 C6 123.1(2) . . ?
C3 N3 C4 112.1(2) . . ?
C6 N3 C4 122.7(2) . . ?
C1 N4 C5 120.9(2) . . ?
C1 N4 C4 112.4(2) . . ?
C5 N4 C4 123.7(2) . . ?
C7 N5 C8 123.2(2) . . ?
C7 N5 C5 118.2(2) . . ?
C8 N5 C5 118.6(2) . . ?
C9 N6 C6 118.1(2) . . ?
C9 N6 C8 122.8(2) . . ?
C6 N6 C8 119.0(2) . . ?
C9 N7 C15 118.1(2) . . ?
C9 N7 C10 122.4(2) . . ?
C15 N7 C10 119.5(2) . . ?
C7 N8 C14 118.4(3) . . ?
C7 N8 C10 121.9(3) . . ?
C14 N8 C10 119.6(2) . . ?
C16 N9 C17 122.3(2) . . ?
C16 N9 C14 118.9(2) . . ?
C17 N9 C14 118.6(2) . . ?
C18 N10 C17 121.9(2) . . ?
C18 N10 C15 120.1(2) . . ?
C17 N10 C15 117.9(2) . . ?
C18 N11 C24 119.0(2) . . ?
C18 N11 C19 122.4(2) . . ?
C24 N11 C19 117.9(2) . . ?
C16 N12 C19 122.6(2) . . ?
C16 N12 C23 119.9(3) . . ?
C19 N12 C23 117.2(2) . . ?
C25 N13 C26 122.2(3) . . ?
C25 N13 C23 118.5(3) . . ?
C26 N13 C23 119.0(3) . . ?
C27 N14 C24 119.5(3) . . ?
C27 N14 C26 121.9(3) . . ?
C24 N14 C26 118.2(2) . . ?
C27 N15 C28 121.9(2) . . ?
C27 N15 C33 119.1(3) . . ?
C28 N15 C33 118.7(3) . . ?
C25 N16 C32 118.4(3) . . ?
C25 N16 C28 121.8(3) . . ?
C32 N16 C28 119.5(3) . . ?
C34 N17 C32 118.6(3) . . ?
C34 N17 C35 122.9(3) . . ?
C32 N17 C35 118.4(3) . . ?
C36 N18 C33 119.4(3) . . ?
C36 N18 C35 121.3(3) . . ?
C33 N18 C35 119.2(3) . . ?
C36 N19 C42 117.6(2) . . ?
C36 N19 C37 122.2(3) . . ?
C42 N19 C37 119.9(2) . . ?
C34 N20 C37 122.5(3) . . ?
C34 N20 C41 118.0(3) . . ?
C37 N20 C41 119.1(2) . . ?
C43 N21 C83 121.5(2) . . ?
C43 N21 C44 111.9(2) . . ?
C83 N21 C44 123.3(2) . . ?
C45 N22 C84 122.8(2) . . ?
C45 N22 C44 112.0(2) . . ?
C84 N22 C44 122.9(2) . . ?
C45 N23 C46 112.2(2) . . ?
C45 N23 C48 123.6(2) . . ?
C46 N23 C48 120.9(2) . . ?
C43 N24 C47 123.3(2) . . ?
C43 N24 C46 111.5(2) . . ?
C47 N24 C46 122.9(2) . . ?
C49 N25 C47 118.8(2) . . ?
C49 N25 C50 121.9(2) . . ?
C47 N25 C50 118.7(2) . . ?
C51 N26 C50 122.8(2) . . ?
C51 N26 C48 117.5(2) . . ?
C50 N26 C48 119.4(2) . . ?
C51 N27 C57 119.1(2) . . ?
C51 N27 C52 121.9(3) . . ?
C57 N27 C52 119.0(2) . . ?
C49 N28 C56 119.1(2) . . ?
C49 N28 C52 122.5(2) . . ?
C56 N28 C52 118.4(2) . . ?
C58 N29 C56 118.6(3) . . ?
C58 N29 C59 122.8(3) . . ?
C56 N29 C59 118.4(2) . . ?
C60 N30 C57 119.2(2) . . ?
C60 N30 C59 122.8(2) . . ?
C57 N30 C59 117.7(2) . . ?
C60 N31 C66 119.0(2) . . ?
C60 N31 C61 122.0(2) . . ?
C66 N31 C61 118.6(2) . . ?
C58 N32 C65 118.1(3) . . ?
C58 N32 C61 122.2(2) . . ?
C65 N32 C61 119.4(2) . . ?
C67 N33 C65 119.6(2) . . ?
C67 N33 C68 123.0(2) . . ?
C65 N33 C68 117.3(2) . . ?
C69 N34 C66 118.8(2) . . ?
C69 N34 C68 122.3(2) . . ?
C66 N34 C68 118.1(2) . . ?
C69 N35 C75 120.1(2) . . ?
C69 N35 C70 122.3(2) . . ?
C75 N35 C70 117.6(2) . . ?
C67 N36 C74 119.2(2) . . ?
C67 N36 C70 122.1(2) . . ?
C74 N36 C70 118.6(2) . . ?
C76 N37 C77 122.4(2) . . ?
C76 N37 C74 118.7(2) . . ?
C77 N37 C74 118.8(2) . . ?
C78 N38 C75 118.7(2) . . ?
C78 N38 C77 122.7(2) . . ?
C75 N38 C77 118.6(2) . . ?
C78 N39 C79 123.1(2) . . ?
C78 N39 C84 117.6(2) . . ?
C79 N39 C84 119.2(2) . . ?
C76 N40 C83 118.7(2) . . ?
C76 N40 C79 122.8(2) . . ?
C83 N40 C79 118.6(2) . . ?
O1 C1 N1 126.4(3) . . ?
O1 C1 N4 125.8(3) . . ?
N1 C1 N4 107.8(2) . . ?
N2 C2 N1 115.2(2) . . ?
N2 C2 C4 103.7(2) . . ?
N1 C2 C4 103.2(2) . . ?
N2 C2 H2 111.4 . . ?
N1 C2 H2 111.4 . . ?
C4 C2 H2 111.4 . . ?
O2 C3 N2 126.1(3) . . ?
O2 C3 N3 125.8(3) . . ?
N2 C3 N3 108.1(2) . . ?
N3 C4 N4 115.7(2) . . ?
N3 C4 C2 103.0(2) . . ?
N4 C4 C2 103.4(2) . . ?
N3 C4 H4 111.4 . . ?
N4 C4 H4 111.4 . . ?
C2 C4 H4 111.4 . . ?
N4 C5 N5 113.7(2) . . ?
N4 C5 H5A 108.8 . . ?
N5 C5 H5A 108.8 . . ?
N4 C5 H5B 108.8 . . ?
N5 C5 H5B 108.8 . . ?
H5A C5 H5B 107.7 . . ?
N3 C6 N6 114.4(2) . . ?
N3 C6 H6A 108.7 . . ?
N6 C6 H6A 108.7 . . ?
N3 C6 H6B 108.7 . . ?
N6 C6 H6B 108.7 . . ?
H6A C6 H6B 107.6 . . ?
O3 C7 N5 120.9(3) . . ?
O3 C7 N8 122.4(3) . . ?
N5 C7 N8 116.6(3) . . ?
N5 C8 N6 113.6(2) . . ?
N5 C8 C11 108.6(2) . . ?
N6 C8 C11 109.7(2) . . ?
N5 C8 H8 108.3 . . ?
N6 C8 H8 108.3 . . ?
C11 C8 H8 108.3 . . ?
O4 C9 N6 121.3(3) . . ?
O4 C9 N7 121.9(3) . . ?
N6 C9 N7 116.8(3) . . ?
N7 C10 N8 112.9(2) . . ?
N7 C10 C11 109.3(3) . . ?
N8 C10 C11 109.7(2) . . ?
N7 C10 H10 108.3 . . ?
N8 C10 H10 108.3 . . ?
C11 C10 H10 108.3 . . ?
C8 C11 C13 110.7(3) . . ?
C8 C11 C12 111.5(2) . . ?
C13 C11 C12 108.7(3) . . ?
C8 C11 C10 102.4(2) . . ?
C13 C11 C10 112.3(3) . . ?
C12 C11 C10 111.2(3) . . ?
C11 C12 H12A 109.5 . . ?
C11 C12 H12B 109.5 . . ?
H12A C12 H12B 109.5 . . ?
C11 C12 H12C 109.5 . . ?
H12A C12 H12C 109.5 . . ?
H12B C12 H12C 109.5 . . ?
C11 C13 H13A 109.5 . . ?
C11 C13 H13B 109.5 . . ?
H13A C13 H13B 109.5 . . ?
C11 C13 H13C 109.5 . . ?
H13A C13 H13C 109.5 . . ?
H13B C13 H13C 109.5 . . ?
N8 C14 N9 114.5(2) . . ?
N8 C14 H14A 108.6 . . ?
N9 C14 H14A 108.6 . . ?
N8 C14 H14B 108.6 . . ?
N9 C14 H14B 108.6 . . ?
H14A C14 H14B 107.6 . . ?
N7 C15 N10 114.9(2) . . ?
N7 C15 H15A 108.6 . . ?
N10 C15 H15A 108.6 . . ?
N7 C15 H15B 108.6 . . ?
N10 C15 H15B 108.6 . . ?
H15A C15 H15B 107.5 . . ?
O5 C16 N9 121.7(3) . . ?
O5 C16 N12 121.7(3) . . ?
N9 C16 N12 116.5(3) . . ?
N10 C17 N9 113.3(2) . . ?
N10 C17 C20 109.1(2) . . ?
N9 C17 C20 110.2(2) . . ?
N10 C17 H17 108.0 . . ?
N9 C17 H17 108.0 . . ?
C20 C17 H17 108.0 . . ?
O6 C18 N11 121.9(3) . . ?
O6 C18 N10 121.3(3) . . ?
N11 C18 N10 116.8(3) . . ?
N12 C19 N11 113.1(2) . . ?
N12 C19 C20 109.7(2) . . ?
N11 C19 C20 109.2(2) . . ?
N12 C19 H19 108.2 . . ?
N11 C19 H19 108.2 . . ?
C20 C19 H19 108.2 . . ?
C17 C20 C19 102.4(2) . . ?
C17 C20 C22 111.6(3) . . ?
C19 C20 C22 111.4(2) . . ?
C17 C20 C21 111.6(3) . . ?
C19 C20 C21 111.5(3) . . ?
C22 C20 C21 108.3(2) . . ?
C20 C21 H21A 109.5 . . ?
C20 C21 H21B 109.5 . . ?
H21A C21 H21B 109.5 . . ?
C20 C21 H21C 109.5 . . ?
H21A C21 H21C 109.5 . . ?
H21B C21 H21C 109.5 . . ?
C20 C22 H22A 109.5 . . ?
C20 C22 H22B 109.5 . . ?
H22A C22 H22B 109.5 . . ?
C20 C22 H22C 109.5 . . ?
H22A C22 H22C 109.5 . . ?
H22B C22 H22C 109.5 . . ?
N12 C23 N13 114.8(2) . . ?
N12 C23 H23A 108.6 . . ?
N13 C23 H23A 108.6 . . ?
N12 C23 H23B 108.6 . . ?
N13 C23 H23B 108.6 . . ?
H23A C23 H23B 107.6 . . ?
N14 C24 N11 114.4(2) . . ?
N14 C24 H24A 108.7 . . ?
N11 C24 H24A 108.7 . . ?
N14 C24 H24B 108.7 . . ?
N11 C24 H24B 108.7 . . ?
H24A C24 H24B 107.6 . . ?
O7 C25 N13 121.5(3) . . ?
O7 C25 N16 121.5(3) . . ?
N13 C25 N16 117.0(3) . . ?
N13 C26 N14 113.4(2) . . ?
N13 C26 C29 109.6(3) . . ?
N14 C26 C29 109.3(2) . . ?
N13 C26 H26 108.1 . . ?
N14 C26 H26 108.1 . . ?
C29 C26 H26 108.1 . . ?
O8 C27 N15 121.8(3) . . ?
O8 C27 N14 121.0(3) . . ?
N15 C27 N14 117.2(3) . . ?
N16 C28 N15 112.6(3) . . ?
N16 C28 C29 110.8(3) . . ?
N15 C28 C29 109.5(3) . . ?
N16 C28 H28 107.9 . . ?
N15 C28 H28 107.9 . . ?
C29 C28 H28 107.9 . . ?
C28 C29 C30 112.2(3) . . ?
C28 C29 C31 111.8(3) . . ?
C30 C29 C31 108.6(3) . . ?
C28 C29 C26 101.7(3) . . ?
C30 C29 C26 111.2(3) . . ?
C31 C29 C26 111.2(3) . . ?
C29 C30 H30A 109.5 . . ?
C29 C30 H30B 109.5 . . ?
H30A C30 H30B 109.5 . . ?
C29 C30 H30C 109.5 . . ?
H30A C30 H30C 109.5 . . ?
H30B C30 H30C 109.5 . . ?
C29 C31 H31A 109.5 . . ?
C29 C31 H31B 109.5 . . ?
H31A C31 H31B 109.5 . . ?
C29 C31 H31C 109.5 . . ?
H31A C31 H31C 109.5 . . ?
H31B C31 H31C 109.5 . . ?
N16 C32 N17 114.6(3) . . ?
N16 C32 H32A 108.6 . . ?
N17 C32 H32A 108.6 . . ?
N16 C32 H32B 108.6 . . ?
N17 C32 H32B 108.6 . . ?
H32A C32 H32B 107.6 . . ?
N18 C33 N15 114.5(3) . . ?
N18 C33 H33A 108.6 . . ?
N15 C33 H33A 108.6 . . ?
N18 C33 H33B 108.6 . . ?
N15 C33 H33B 108.6 . . ?
H33A C33 H33B 107.6 . . ?
O9 C34 N20 122.0(3) . . ?
O9 C34 N17 121.4(3) . . ?
N20 C34 N17 116.6(3) . . ?
N17 C35 N18 112.4(2) . . ?
N17 C35 C38 109.7(3) . . ?
N18 C35 C38 109.3(3) . . ?
N17 C35 H35 108.5 . . ?
N18 C35 H35 108.5 . . ?
C38 C35 H35 108.5 . . ?
O10 C36 N18 121.1(3) . . ?
O10 C36 N19 120.8(3) . . ?
N18 C36 N19 118.0(3) . . ?
N19 C37 N20 113.4(2) . . ?
N19 C37 C38 109.4(3) . . ?
N20 C37 C38 109.8(2) . . ?
N19 C37 H37 108.0 . . ?
N20 C37 H37 108.0 . . ?
C38 C37 H37 108.0 . . ?
C39 C38 C40 107.9(3) . . ?
C39 C38 C37 112.1(3) . . ?
C40 C38 C37 111.8(3) . . ?
C39 C38 C35 110.9(3) . . ?
C40 C38 C35 111.9(3) . . ?
C37 C38 C35 102.2(2) . . ?
C38 C39 H39A 109.5 . . ?
C38 C39 H39B 109.5 . . ?
H39A C39 H39B 109.5 . . ?
C38 C39 H39C 109.5 . . ?
H39A C39 H39C 109.5 . . ?
H39B C39 H39C 109.5 . . ?
C38 C40 H40A 109.5 . . ?
C38 C40 H40B 109.5 . . ?
H40A C40 H40B 109.5 . . ?
C38 C40 H40C 109.5 . . ?
H40A C40 H40C 109.5 . . ?
H40B C40 H40C 109.5 . . ?
N1 C41 N20 114.5(2) . . ?
N1 C41 H41A 108.6 . . ?
N20 C41 H41A 108.6 . . ?
N1 C41 H41B 108.6 . . ?
N20 C41 H41B 108.6 . . ?
H41A C41 H41B 107.6 . . ?
N2 C42 N19 113.4(2) . . ?
N2 C42 H42A 108.9 . . ?
N19 C42 H42A 108.9 . . ?
N2 C42 H42B 108.9 . . ?
N19 C42 H42B 108.9 . . ?
H42A C42 H42B 107.7 . . ?
O11 C43 N21 126.0(3) . . ?
O11 C43 N24 125.5(3) . . ?
N21 C43 N24 108.5(2) . . ?
N22 C44 N21 115.7(2) . . ?
N22 C44 C46 103.2(2) . . ?
N21 C44 C46 103.4(2) . . ?
N22 C44 H44 111.3 . . ?
N21 C44 H44 111.3 . . ?
C46 C44 H44 111.3 . . ?
O12 C45 N23 126.2(3) . . ?
O12 C45 N22 125.6(3) . . ?
N23 C45 N22 108.1(2) . . ?
N23 C46 N24 115.1(2) . . ?
N23 C46 C44 103.4(2) . . ?
N24 C46 C44 103.9(2) . . ?
N23 C46 H46 111.3 . . ?
N24 C46 H46 111.3 . . ?
C44 C46 H46 111.3 . . ?
N24 C47 N25 114.6(2) . . ?
N24 C47 H47A 108.6 . . ?
N25 C47 H47A 108.6 . . ?
N24 C47 H47B 108.6 . . ?
N25 C47 H47B 108.6 . . ?
H47A C47 H47B 107.6 . . ?
N23 C48 N26 113.8(2) . . ?
N23 C48 H48A 108.8 . . ?
N26 C48 H48A 108.8 . . ?
N23 C48 H48B 108.8 . . ?
N26 C48 H48B 108.8 . . ?
H48A C48 H48B 107.7 . . ?
O13 C49 N28 121.5(3) . . ?
O13 C49 N25 121.2(3) . . ?
N28 C49 N25 117.3(3) . . ?
N26 C50 N25 112.6(2) . . ?
N26 C50 C53 109.0(2) . . ?
N25 C50 C53 109.8(2) . . ?
N26 C50 H50 108.4 . . ?
N25 C50 H50 108.4 . . ?
C53 C50 H50 108.4 . . ?
O14 C51 N27 121.5(3) . . ?
O14 C51 N26 120.9(3) . . ?
N27 C51 N26 117.5(3) . . ?
N28 C52 N27 112.1(2) . . ?
N28 C52 C53 110.1(2) . . ?
N27 C52 C53 108.9(2) . . ?
N28 C52 H52 108.5 . . ?
N27 C52 H52 108.5 . . ?
C53 C52 H52 108.5 . . ?
C50 C53 C52 102.9(2) . . ?
C50 C53 C54 111.2(3) . . ?
C52 C53 C54 111.1(3) . . ?
C50 C53 C55 111.5(2) . . ?
C52 C53 C55 112.2(3) . . ?
C54 C53 C55 107.9(3) . . ?
C53 C54 H54A 109.5 . . ?
C53 C54 H54B 109.5 . . ?
H54A C54 H54B 109.5 . . ?
C53 C54 H54C 109.5 . . ?
H54A C54 H54C 109.5 . . ?
H54B C54 H54C 109.5 . . ?
C53 C55 H55A 109.5 . . ?
C53 C55 H55B 109.5 . . ?
H55A C55 H55B 109.5 . . ?
C53 C55 H55C 109.5 . . ?
H55A C55 H55C 109.5 . . ?
H55B C55 H55C 109.5 . . ?
N28 C56 N29 115.3(2) . . ?
N28 C56 H56A 108.4 . . ?
N29 C56 H56A 108.4 . . ?
N28 C56 H56B 108.4 . . ?
N29 C56 H56B 108.4 . . ?
H56A C56 H56B 107.5 . . ?
N30 C57 N27 114.6(2) . . ?
N30 C57 H57A 108.6 . . ?
N27 C57 H57A 108.6 . . ?
N30 C57 H57B 108.6 . . ?
N27 C57 H57B 108.6 . . ?
H57A C57 H57B 107.6 . . ?
O15 C58 N29 122.8(3) . . ?
O15 C58 N32 120.9(3) . . ?
N29 C58 N32 116.3(3) . . ?
N29 C59 N30 113.1(2) . . ?
N29 C59 C62 109.8(2) . . ?
N30 C59 C62 109.1(2) . . ?
N29 C59 H59 108.2 . . ?
N30 C59 H59 108.2 . . ?
C62 C59 H59 108.2 . . ?
O16 C60 N30 121.8(3) . . ?
O16 C60 N31 121.7(3) . . ?
N30 C60 N31 116.4(3) . . ?
N32 C61 N31 113.2(2) . . ?
N32 C61 C62 109.9(2) . . ?
N31 C61 C62 109.2(2) . . ?
N32 C61 H61 108.1 . . ?
N31 C61 H61 108.1 . . ?
C62 C61 H61 108.1 . . ?
C59 C62 C64 112.2(3) . . ?
C59 C62 C63 112.3(3) . . ?
C64 C62 C63 108.3(3) . . ?
C59 C62 C61 102.5(2) . . ?
C64 C62 C61 111.1(3) . . ?
C63 C62 C61 110.4(3) . . ?
C62 C63 H63A 109.5 . . ?
C62 C63 H63B 109.5 . . ?
H63A C63 H63B 109.5 . . ?
C62 C63 H63C 109.5 . . ?
H63A C63 H63C 109.5 . . ?
H63B C63 H63C 109.5 . . ?
C62 C64 H64A 109.5 . . ?
C62 C64 H64B 109.5 . . ?
H64A C64 H64B 109.5 . . ?
C62 C64 H64C 109.5 . . ?
H64A C64 H64C 109.5 . . ?
H64B C64 H64C 109.5 . . ?
N32 C65 N33 115.0(2) . . ?
N32 C65 H65A 108.5 . . ?
N33 C65 H65A 108.5 . . ?
N32 C65 H65B 108.5 . . ?
N33 C65 H65B 108.5 . . ?
H65A C65 H65B 107.5 . . ?
N34 C66 N31 114.3(2) . . ?
N34 C66 H66A 108.7 . . ?
N31 C66 H66A 108.7 . . ?
N34 C66 H66B 108.7 . . ?
N31 C66 H66B 108.7 . . ?
H66A C66 H66B 107.6 . . ?
O17 C67 N33 122.4(3) . . ?
O17 C67 N36 120.9(3) . . ?
N33 C67 N36 116.7(3) . . ?
N33 C68 N34 112.5(2) . . ?
N33 C68 C71 109.2(2) . . ?
N34 C68 C71 109.5(2) . . ?
N33 C68 H68 108.5 . . ?
N34 C68 H68 108.5 . . ?
C71 C68 H68 108.5 . . ?
O18 C69 N34 121.3(3) . . ?
O18 C69 N35 121.5(3) . . ?
N34 C69 N35 117.2(3) . . ?
N35 C70 N36 112.8(2) . . ?
N35 C70 C71 109.2(2) . . ?
N36 C70 C71 110.0(2) . . ?
N35 C70 H70 108.3 . . ?
N36 C70 H70 108.3 . . ?
C71 C70 H70 108.3 . . ?
C68 C71 C70 102.7(2) . . ?
C68 C71 C73 111.1(2) . . ?
C70 C71 C73 111.4(2) . . ?
C68 C71 C72 111.8(2) . . ?
C70 C71 C72 111.8(3) . . ?
C73 C71 C72 108.0(2) . . ?
C71 C72 H72A 109.5 . . ?
C71 C72 H72B 109.5 . . ?
H72A C72 H72B 109.5 . . ?
C71 C72 H72C 109.5 . . ?
H72A C72 H72C 109.5 . . ?
H72B C72 H72C 109.5 . . ?
C71 C73 H73A 109.5 . . ?
C71 C73 H73B 109.5 . . ?
H73A C73 H73B 109.5 . . ?
C71 C73 H73C 109.5 . . ?
H73A C73 H73C 109.5 . . ?
H73B C73 H73C 109.5 . . ?
N36 C74 N37 114.8(2) . . ?
N36 C74 H74A 108.6 . . ?
N37 C74 H74A 108.6 . . ?
N36 C74 H74B 108.6 . . ?
N37 C74 H74B 108.6 . . ?
H74A C74 H74B 107.6 . . ?
N38 C75 N35 115.1(2) . . ?
N38 C75 H75A 108.5 . . ?
N35 C75 H75A 108.5 . . ?
N38 C75 H75B 108.5 . . ?
N35 C75 H75B 108.5 . . ?
H75A C75 H75B 107.5 . . ?
O19 C76 N40 121.1(3) . . ?
O19 C76 N37 122.3(3) . . ?
N40 C76 N37 116.6(3) . . ?
N37 C77 N38 113.0(2) . . ?
N37 C77 C80 109.4(2) . . ?
N38 C77 C80 109.1(2) . . ?
N37 C77 H77 108.4 . . ?
N38 C77 H77 108.4 . . ?
C80 C77 H77 108.4 . . ?
O20 C78 N39 121.6(3) . . ?
O20 C78 N38 121.9(3) . . ?
N39 C78 N38 116.4(2) . . ?
N40 C79 N39 112.9(2) . . ?
N40 C79 C80 109.2(2) . . ?
N39 C79 C80 109.4(2) . . ?
N40 C79 H79 108.4 . . ?
N39 C79 H79 108.4 . . ?
C80 C79 H79 108.4 . . ?
C79 C80 C82 110.7(2) . . ?
C79 C80 C77 102.8(2) . . ?
C82 C80 C77 112.7(2) . . ?
C79 C80 C81 111.3(2) . . ?
C82 C80 C81 107.8(2) . . ?
C77 C80 C81 111.6(2) . . ?
C80 C81 H81A 109.5 . . ?
C80 C81 H81B 109.5 . . ?
H81A C81 H81B 109.5 . . ?
C80 C81 H81C 109.5 . . ?
H81A C81 H81C 109.5 . . ?
H81B C81 H81C 109.5 . . ?
C80 C82 H82A 109.5 . . ?
C80 C82 H82B 109.5 . . ?
H82A C82 H82B 109.5 . . ?
C80 C82 H82C 109.5 . . ?
H82A C82 H82C 109.5 . . ?
H82B C82 H82C 109.5 . . ?
N21 C83 N40 114.0(2) . . ?
N21 C83 H83A 108.7 . . ?
N40 C83 H83A 108.7 . . ?
N21 C83 H83B 108.7 . . ?
N40 C83 H83B 108.7 . . ?
H83A C83 H83B 107.6 . . ?
N22 C84 N39 114.2(2) . . ?
N22 C84 H84A 108.7 . . ?
N39 C84 H84A 108.7 . . ?
N22 C84 H84B 108.7 . . ?
N39 C84 H84B 108.7 . . ?
H84A C84 H84B 107.6 . . ?

loop_
 _geom_torsion_atom_site_label_1
 _geom_torsion_atom_site_label_2
 _geom_torsion_atom_site_label_3
 _geom_torsion_atom_site_label_4
 _geom_torsion
 _geom_torsion_site_symmetry_1
 _geom_torsion_site_symmetry_2
 _geom_torsion_site_symmetry_3
 _geom_torsion_site_symmetry_4
 _geom_torsion_publ_flag
C41 N1 C1 O1 3.7(5) . . . . ?
C2 N1 C1 O1 169.0(3) . . . . ?
C41 N1 C1 N4 -174.5(3) . . . . ?
C2 N1 C1 N4 -9.2(3) . . . . ?
C5 N4 C1 O1 -7.2(4) . . . . ?
C4 N4 C1 O1 -168.1(3) . . . . ?
C5 N4 C1 N1 171.0(2) . . . . ?
C4 N4 C1 N1 10.1(3) . . . . ?
C3 N2 C2 N1 -119.3(3) . . . . ?
C42 N2 C2 N1 81.6(3) . . . . ?
C3 N2 C2 C4 -7.3(3) . . . . ?
C42 N2 C2 C4 -166.4(2) . . . . ?
C1 N1 C2 N2 117.1(3) . . . . ?
C41 N1 C2 N2 -77.8(3) . . . . ?
C1 N1 C2 C4 4.8(3) . . . . ?
C41 N1 C2 C4 169.8(3) . . . . ?
C2 N2 C3 O2 -167.4(3) . . . . ?
C42 N2 C3 O2 -8.6(4) . . . . ?
C2 N2 C3 N3 10.4(3) . . . . ?
C42 N2 C3 N3 169.2(2) . . . . ?
C6 N3 C3 O2 4.5(4) . . . . ?
C4 N3 C3 O2 168.6(3) . . . . ?
C6 N3 C3 N2 -173.3(2) . . . . ?
C4 N3 C3 N2 -9.3(3) . . . . ?
C3 N3 C4 N4 116.5(3) . . . . ?
C6 N3 C4 N4 -79.3(3) . . . . ?
C3 N3 C4 C2 4.6(3) . . . . ?
C6 N3 C4 C2 168.7(2) . . . . ?
C1 N4 C4 N3 -118.7(3) . . . . ?
C5 N4 C4 N3 81.1(3) . . . . ?
C1 N4 C4 C2 -6.9(3) . . . . ?
C5 N4 C4 C2 -167.1(2) . . . . ?
N2 C2 C4 N3 1.5(3) . . . . ?
N1 C2 C4 N3 122.1(2) . . . . ?
N2 C2 C4 N4 -119.3(2) . . . . ?
N1 C2 C4 N4 1.2(3) . . . . ?
C1 N4 C5 N5 116.5(3) . . . . ?
C4 N4 C5 N5 -84.9(3) . . . . ?
C7 N5 C5 N4 -92.6(3) . . . . ?
C8 N5 C5 N4 85.6(3) . . . . ?
C3 N3 C6 N6 -114.1(3) . . . . ?
C4 N3 C6 N6 83.5(3) . . . . ?
C9 N6 C6 N3 89.4(3) . . . . ?
C8 N6 C6 N3 -86.3(3) . . . . ?
C8 N5 C7 O3 172.6(3) . . . . ?
C5 N5 C7 O3 -9.2(4) . . . . ?
C8 N5 C7 N8 -4.9(4) . . . . ?
C5 N5 C7 N8 173.2(2) . . . . ?
C14 N8 C7 O3 4.8(4) . . . . ?
C10 N8 C7 O3 -171.3(3) . . . . ?
C14 N8 C7 N5 -177.7(2) . . . . ?
C10 N8 C7 N5 6.2(4) . . . . ?
C7 N5 C8 N6 90.1(3) . . . . ?
C5 N5 C8 N6 -88.1(3) . . . . ?
C7 N5 C8 C11 -32.3(4) . . . . ?
C5 N5 C8 C11 149.6(2) . . . . ?
C9 N6 C8 N5 -87.0(3) . . . . ?
C6 N6 C8 N5 88.5(3) . . . . ?
C9 N6 C8 C11 34.7(4) . . . . ?
C6 N6 C8 C11 -149.7(3) . . . . ?
C6 N6 C9 O4 4.8(4) . . . . ?
C8 N6 C9 O4 -179.6(3) . . . . ?
C6 N6 C9 N7 -178.0(2) . . . . ?
C8 N6 C9 N7 -2.5(4) . . . . ?
C15 N7 C9 O4 -0.3(4) . . . . ?
C10 N7 C9 O4 -179.9(3) . . . . ?
C15 N7 C9 N6 -177.4(2) . . . . ?
C10 N7 C9 N6 3.0(4) . . . . ?
C9 N7 C10 N8 87.1(3) . . . . ?
C15 N7 C10 N8 -92.4(3) . . . . ?
C9 N7 C10 C11 -35.2(4) . . . . ?
C15 N7 C10 C11 145.2(3) . . . . ?
C7 N8 C10 N7 -92.7(3) . . . . ?
C14 N8 C10 N7 91.3(3) . . . . ?
C7 N8 C10 C11 29.5(4) . . . . ?
C14 N8 C10 C11 -146.5(3) . . . . ?
N5 C8 C11 C13 -177.2(2) . . . . ?
N6 C8 C11 C13 58.1(3) . . . . ?
N5 C8 C11 C12 -56.1(3) . . . . ?
N6 C8 C11 C12 179.3(3) . . . . ?
N5 C8 C11 C10 62.9(3) . . . . ?
N6 C8 C11 C10 -61.7(3) . . . . ?
N7 C10 C11 C8 62.1(3) . . . . ?
N8 C10 C11 C8 -62.2(3) . . . . ?
N7 C10 C11 C13 -56.7(3) . . . . ?
N8 C10 C11 C13 179.0(2) . . . . ?
N7 C10 C11 C12 -178.8(2) . . . . ?
N8 C10 C11 C12 56.9(3) . . . . ?
C7 N8 C14 N9 103.8(3) . . . . ?
C10 N8 C14 N9 -80.0(3) . . . . ?
C16 N9 C14 N8 -104.2(3) . . . . ?
C17 N9 C14 N8 80.5(3) . . . . ?
C9 N7 C15 N10 -97.8(3) . . . . ?
C10 N7 C15 N10 81.8(3) . . . . ?
C18 N10 C15 N7 103.2(3) . . . . ?
C17 N10 C15 N7 -80.1(3) . . . . ?
C17 N9 C16 O5 173.9(3) . . . . ?
C14 N9 C16 O5 -1.1(4) . . . . ?
C17 N9 C16 N12 -3.1(4) . . . . ?
C14 N9 C16 N12 -178.2(2) . . . . ?
C19 N12 C16 O5 -175.1(3) . . . . ?
C23 N12 C16 O5 -1.8(4) . . . . ?
C19 N12 C16 N9 2.0(4) . . . . ?
C23 N12 C16 N9 175.3(3) . . . . ?
C18 N10 C17 N9 -91.0(3) . . . . ?
C15 N10 C17 N9 92.3(3) . . . . ?
C18 N10 C17 C20 32.2(3) . . . . ?
C15 N10 C17 C20 -144.5(2) . . . . ?
C16 N9 C17 N10 91.4(3) . . . . ?
C14 N9 C17 N10 -93.5(3) . . . . ?
C16 N9 C17 C20 -31.2(4) . . . . ?
C14 N9 C17 C20 143.9(3) . . . . ?
C24 N11 C18 O6 -0.3(4) . . . . ?
C19 N11 C18 O6 170.0(3) . . . . ?
C24 N11 C18 N10 -177.1(2) . . . . ?
C19 N11 C18 N10 -6.8(4) . . . . ?
C17 N10 C18 O6 -171.4(3) . . . . ?
C15 N10 C18 O6 5.2(4) . . . . ?
C17 N10 C18 N11 5.4(4) . . . . ?
C15 N10 C18 N11 -178.0(2) . . . . ?
C16 N12 C19 N11 -89.1(3) . . . . ?
C23 N12 C19 N11 97.4(3) . . . . ?
C16 N12 C19 C20 33.1(4) . . . . ?
C23 N12 C19 C20 -140.4(3) . . . . ?
C18 N11 C19 N12 93.2(3) . . . . ?
C24 N11 C19 N12 -96.4(3) . . . . ?
C18 N11 C19 C20 -29.3(4) . . . . ?
C24 N11 C19 C20 141.1(3) . . . . ?
N10 C17 C20 C19 -63.8(3) . . . . ?
N9 C17 C20 C19 61.3(3) . . . . ?
N10 C17 C20 C22 55.5(3) . . . . ?
N9 C17 C20 C22 -179.4(2) . . . . ?
N10 C17 C20 C21 176.8(2) . . . . ?
N9 C17 C20 C21 -58.1(3) . . . . ?
N12 C19 C20 C17 -62.1(3) . . . . ?
N11 C19 C20 C17 62.4(3) . . . . ?
N12 C19 C20 C22 178.5(2) . . . . ?
N11 C19 C20 C22 -57.0(3) . . . . ?
N12 C19 C20 C21 57.4(3) . . . . ?
N11 C19 C20 C21 -178.1(2) . . . . ?
C16 N12 C23 N13 108.5(3) . . . . ?
C19 N12 C23 N13 -77.8(3) . . . . ?
C25 N13 C23 N12 -108.6(3) . . . . ?
C26 N13 C23 N12 76.5(3) . . . . ?
C27 N14 C24 N11 109.6(3) . . . . ?
C26 N14 C24 N11 -78.0(3) . . . . ?
C18 N11 C24 N14 -112.2(3) . . . . ?
C19 N11 C24 N14 77.0(3) . . . . ?
C26 N13 C25 O7 172.4(4) . . . . ?
C23 N13 C25 O7 -2.3(5) . . . . ?
C26 N13 C25 N16 -6.4(4) . . . . ?
C23 N13 C25 N16 178.9(3) . . . . ?
C32 N16 C25 O7 2.7(5) . . . . ?
C28 N16 C25 O7 -170.7(4) . . . . ?
C32 N16 C25 N13 -178.5(3) . . . . ?
C28 N16 C25 N13 8.1(5) . . . . ?
C25 N13 C26 N14 91.3(3) . . . . ?
C23 N13 C26 N14 -94.0(3) . . . . ?
C25 N13 C26 C29 -31.2(4) . . . . ?
C23 N13 C26 C29 143.5(3) . . . . ?
C27 N14 C26 N13 -92.2(3) . . . . ?
C24 N14 C26 N13 95.6(3) . . . . ?
C27 N14 C26 C29 30.5(4) . . . . ?
C24 N14 C26 C29 -141.8(3) . . . . ?
C28 N15 C27 O8 172.2(3) . . . . ?
C33 N15 C27 O8 -1.8(5) . . . . ?
C28 N15 C27 N14 -5.2(4) . . . . ?
C33 N15 C27 N14 -179.2(3) . . . . ?
C24 N14 C27 O8 0.6(4) . . . . ?
C26 N14 C27 O8 -171.5(3) . . . . ?
C24 N14 C27 N15 178.1(3) . . . . ?
C26 N14 C27 N15 5.9(4) . . . . ?
C25 N16 C28 N15 -94.4(3) . . . . ?
C32 N16 C28 N15 92.2(3) . . . . ?
C25 N16 C28 C29 28.7(4) . . . . ?
C32 N16 C28 C29 -144.7(3) . . . . ?
C27 N15 C28 N16 91.4(3) . . . . ?
C33 N15 C28 N16 -94.5(3) . . . . ?
C27 N15 C28 C29 -32.4(4) . . . . ?
C33 N15 C28 C29 141.7(3) . . . . ?
N16 C28 C29 C30 57.8(4) . . . . ?
N15 C28 C29 C30 -177.3(3) . . . . ?
N16 C28 C29 C31 -179.9(3) . . . . ?
N15 C28 C29 C31 -55.0(3) . . . . ?
N16 C28 C29 C26 -61.2(3) . . . . ?
N15 C28 C29 C26 63.7(3) . . . . ?
N13 C26 C29 C28 62.1(3) . . . . ?
N14 C26 C29 C28 -62.8(3) . . . . ?
N13 C26 C29 C30 -57.6(4) . . . . ?
N14 C26 C29 C30 177.6(3) . . . . ?
N13 C26 C29 C31 -178.8(3) . . . . ?
N14 C26 C29 C31 56.4(3) . . . . ?
C25 N16 C32 N17 108.2(3) . . . . ?
C28 N16 C32 N17 -78.2(4) . . . . ?
C34 N17 C32 N16 -102.6(3) . . . . ?
C35 N17 C32 N16 80.6(3) . . . . ?
C36 N18 C33 N15 102.2(3) . . . . ?
C35 N18 C33 N15 -78.2(4) . . . . ?
C27 N15 C33 N18 -105.5(3) . . . . ?
C28 N15 C33 N18 80.3(4) . . . . ?
C37 N20 C34 O9 179.0(3) . . . . ?
C41 N20 C34 O9 6.6(4) . . . . ?
C37 N20 C34 N17 -3.9(4) . . . . ?
C41 N20 C34 N17 -176.3(2) . . . . ?
C32 N17 C34 O9 3.0(4) . . . . ?
C35 N17 C34 O9 179.6(3) . . . . ?
C32 N17 C34 N20 -174.2(3) . . . . ?
C35 N17 C34 N20 2.5(4) . . . . ?
C34 N17 C35 N18 88.1(3) . . . . ?
C32 N17 C35 N18 -95.3(3) . . . . ?
C34 N17 C35 C38 -33.7(4) . . . . ?
C32 N17 C35 C38 142.9(3) . . . . ?
C36 N18 C35 N17 -87.5(3) . . . . ?
C33 N18 C35 N17 92.9(3) . . . . ?
C36 N18 C35 C38 34.6(4) . . . . ?
C33 N18 C35 C38 -145.0(3) . . . . ?
C33 N18 C36 O10 0.8(4) . . . . ?
C35 N18 C36 O10 -178.8(3) . . . . ?
C33 N18 C36 N19 178.5(3) . . . . ?
C35 N18 C36 N19 -1.1(4) . . . . ?
C42 N19 C36 O10 -8.0(4) . . . . ?
C37 N19 C36 O10 178.6(3) . . . . ?
C42 N19 C36 N18 174.3(2) . . . . ?
C37 N19 C36 N18 0.9(4) . . . . ?
C36 N19 C37 N20 88.6(3) . . . . ?
C42 N19 C37 N20 -84.7(3) . . . . ?
C36 N19 C37 C38 -34.3(4) . . . . ?
C42 N19 C37 C38 152.4(2) . . . . ?
C34 N20 C37 N19 -86.0(3) . . . . ?
C41 N20 C37 N19 86.3(3) . . . . ?
C34 N20 C37 C38 36.7(4) . . . . ?
C41 N20 C37 C38 -151.0(3) . . . . ?
N19 C37 C38 C39 -178.6(2) . . . . ?
N20 C37 C38 C39 56.4(3) . . . . ?
N19 C37 C38 C40 -57.2(3) . . . . ?
N20 C37 C38 C40 177.7(3) . . . . ?
N19 C37 C38 C35 62.6(3) . . . . ?
N20 C37 C38 C35 -62.4(3) . . . . ?
N17 C35 C38 C39 -58.8(3) . . . . ?
N18 C35 C38 C39 177.5(3) . . . . ?
N17 C35 C38 C40 -179.4(3) . . . . ?
N18 C35 C38 C40 56.9(3) . . . . ?
N17 C35 C38 C37 60.8(3) . . . . ?
N18 C35 C38 C37 -62.8(3) . . . . ?
C1 N1 C41 N20 -112.8(3) . . . . ?
C2 N1 C41 N20 83.6(3) . . . . ?
C34 N20 C41 N1 84.5(3) . . . . ?
C37 N20 C41 N1 -88.1(3) . . . . ?
C3 N2 C42 N19 114.3(3) . . . . ?
C2 N2 C42 N19 -88.8(3) . . . . ?
C36 N19 C42 N2 -86.2(3) . . . . ?
C37 N19 C42 N2 87.4(3) . . . . ?
C83 N21 C43 O11 7.4(5) . . . . ?
C44 N21 C43 O11 167.3(3) . . . . ?
C83 N21 C43 N24 -170.0(2) . . . . ?
C44 N21 C43 N24 -10.1(3) . . . . ?
C47 N24 C43 O11 -4.9(5) . . . . ?
C46 N24 C43 O11 -168.0(3) . . . . ?
C47 N24 C43 N21 172.5(3) . . . . ?
C46 N24 C43 N21 9.4(3) . . . . ?
C45 N22 C44 N21 -117.3(3) . . . . ?
C84 N22 C44 N21 79.3(3) . . . . ?
C45 N22 C44 C46 -5.2(3) . . . . ?
C84 N22 C44 C46 -168.6(2) . . . . ?
C43 N21 C44 N22 118.6(3) . . . . ?
C83 N21 C44 N22 -81.9(3) . . . . ?
C43 N21 C44 C46 6.6(3) . . . . ?
C83 N21 C44 C46 166.1(3) . . . . ?
C46 N23 C45 O12 166.3(3) . . . . ?
C48 N23 C45 O12 6.3(4) . . . . ?
C46 N23 C45 N22 -10.9(3) . . . . ?
C48 N23 C45 N22 -170.8(3) . . . . ?
C84 N22 C45 O12 -3.8(4) . . . . ?
C44 N22 C45 O12 -167.2(3) . . . . ?
C84 N22 C45 N23 173.4(2) . . . . ?
C44 N22 C45 N23 10.0(3) . . . . ?
C45 N23 C46 N24 119.9(3) . . . . ?
C48 N23 C46 N24 -79.5(3) . . . . ?
C45 N23 C46 C44 7.4(3) . . . . ?
C48 N23 C46 C44 167.9(2) . . . . ?
C43 N24 C46 N23 -117.3(3) . . . . ?
C47 N24 C46 N23 79.5(3) . . . . ?
C43 N24 C46 C44 -5.0(3) . . . . ?
C47 N24 C46 C44 -168.2(3) . . . . ?
N22 C44 C46 N23 -1.2(3) . . . . ?
N21 C44 C46 N23 119.6(2) . . . . ?
N22 C44 C46 N24 -121.7(2) . . . . ?
N21 C44 C46 N24 -0.9(3) . . . . ?
C43 N24 C47 N25 111.4(3) . . . . ?
C46 N24 C47 N25 -87.4(3) . . . . ?
C49 N25 C47 N24 -82.8(3) . . . . ?
C50 N25 C47 N24 88.6(3) . . . . ?
C45 N23 C48 N26 -113.7(3) . . . . ?
C46 N23 C48 N26 88.0(3) . . . . ?
C51 N26 C48 N23 82.9(3) . . . . ?
C50 N26 C48 N23 -90.3(3) . . . . ?
C56 N28 C49 O13 -0.9(4) . . . . ?
C52 N28 C49 O13 -179.8(3) . . . . ?
C56 N28 C49 N25 176.9(2) . . . . ?
C52 N28 C49 N25 -2.0(4) . . . . ?
C47 N25 C49 O13 -8.5(4) . . . . ?
C50 N25 C49 O13 -179.5(3) . . . . ?
C47 N25 C49 N28 173.8(2) . . . . ?
C50 N25 C49 N28 2.7(4) . . . . ?
C51 N26 C50 N25 -87.5(3) . . . . ?
C48 N26 C50 N25 85.3(3) . . . . ?
C51 N26 C50 C53 34.6(4) . . . . ?
C48 N26 C50 C53 -152.6(2) . . . . ?
C49 N25 C50 N26 86.6(3) . . . . ?
C47 N25 C50 N26 -84.4(3) . . . . ?
C49 N25 C50 C53 -35.0(4) . . . . ?
C47 N25 C50 C53 153.9(3) . . . . ?
C57 N27 C51 O14 2.0(4) . . . . ?
C52 N27 C51 O14 -179.5(3) . . . . ?
C57 N27 C51 N26 -176.2(2) . . . . ?
C52 N27 C51 N26 2.3(4) . . . . ?
C50 N26 C51 O14 179.7(3) . . . . ?
C48 N26 C51 O14 6.7(4) . . . . ?
C50 N26 C51 N27 -2.1(4) . . . . ?
C48 N26 C51 N27 -175.1(2) . . . . ?
C49 N28 C52 N27 -87.8(3) . . . . ?
C56 N28 C52 N27 93.2(3) . . . . ?
C49 N28 C52 C53 33.6(4) . . . . ?
C56 N28 C52 C53 -145.3(2) . . . . ?
C51 N27 C52 N28 87.4(3) . . . . ?
C57 N27 C52 N28 -94.1(3) . . . . ?
C51 N27 C52 C53 -34.7(4) . . . . ?
C57 N27 C52 C53 143.8(2) . . . . ?
N26 C50 C53 C52 -62.3(3) . . . . ?
N25 C50 C53 C52 61.4(3) . . . . ?
N26 C50 C53 C54 178.6(2) . . . . ?
N25 C50 C53 C54 -57.6(3) . . . . ?
N26 C50 C53 C55 58.1(3) . . . . ?
N25 C50 C53 C55 -178.1(3) . . . . ?
N28 C52 C53 C50 -60.9(3) . . . . ?
N27 C52 C53 C50 62.4(3) . . . . ?
N28 C52 C53 C54 58.2(3) . . . . ?
N27 C52 C53 C54 -178.5(2) . . . . ?
N28 C52 C53 C55 179.1(2) . . . . ?
N27 C52 C53 C55 -57.5(3) . . . . ?
C49 N28 C56 N29 101.3(3) . . . . ?
C52 N28 C56 N29 -79.7(3) . . . . ?
C58 N29 C56 N28 -103.8(3) . . . . ?
C59 N29 C56 N28 79.7(3) . . . . ?
C60 N30 C57 N27 107.5(3) . . . . ?
C59 N30 C57 N27 -78.9(3) . . . . ?
C51 N27 C57 N30 -101.2(3) . . . . ?
C52 N27 C57 N30 80.3(3) . . . . ?
C56 N29 C58 O15 0.4(4) . . . . ?
C59 N29 C58 O15 176.6(3) . . . . ?
C56 N29 C58 N32 -177.5(2) . . . . ?
C59 N29 C58 N32 -1.2(4) . . . . ?
C65 N32 C58 O15 -2.8(4) . . . . ?
C61 N32 C58 O15 -176.8(3) . . . . ?
C65 N32 C58 N29 175.0(2) . . . . ?
C61 N32 C58 N29 1.1(4) . . . . ?
C58 N29 C59 N30 89.3(3) . . . . ?
C56 N29 C59 N30 -94.5(3) . . . . ?
C58 N29 C59 C62 -32.9(4) . . . . ?
C56 N29 C59 C62 143.4(3) . . . . ?
C60 N30 C59 N29 -92.7(3) . . . . ?
C57 N30 C59 N29 93.9(3) . . . . ?
C60 N30 C59 C62 29.9(4) . . . . ?
C57 N30 C59 C62 -143.5(3) . . . . ?
C57 N30 C60 O16 3.3(4) . . . . ?
C59 N30 C60 O16 -170.0(3) . . . . ?
C57 N30 C60 N31 -179.1(2) . . . . ?
C59 N30 C60 N31 7.7(4) . . . . ?
C66 N31 C60 O16 -2.8(4) . . . . ?
C61 N31 C60 O16 170.0(3) . . . . ?
C66 N31 C60 N30 179.5(3) . . . . ?
C61 N31 C60 N30 -7.6(4) . . . . ?
C58 N32 C61 N31 -89.5(3) . . . . ?
C65 N32 C61 N31 96.6(3) . . . . ?
C58 N32 C61 C62 33.0(4) . . . . ?
C65 N32 C61 C62 -140.9(3) . . . . ?
C60 N31 C61 N32 93.1(3) . . . . ?
C66 N31 C61 N32 -94.0(3) . . . . ?
C60 N31 C61 C62 -29.7(4) . . . . ?
C66 N31 C61 C62 143.1(3) . . . . ?
N29 C59 C62 C64 -178.9(2) . . . . ?
N30 C59 C62 C64 56.6(3) . . . . ?
N29 C59 C62 C63 -56.7(3) . . . . ?
N30 C59 C62 C63 178.8(2) . . . . ?
N29 C59 C62 C61 61.8(3) . . . . ?
N30 C59 C62 C61 -62.7(3) . . . . ?
N32 C61 C62 C59 -62.0(3) . . . . ?
N31 C61 C62 C59 62.8(3) . . . . ?
N32 C61 C62 C64 177.9(3) . . . . ?
N31 C61 C62 C64 -57.3(3) . . . . ?
N32 C61 C62 C63 57.8(3) . . . . ?
N31 C61 C62 C63 -177.4(2) . . . . ?
C58 N32 C65 N33 108.3(3) . . . . ?
C61 N32 C65 N33 -77.5(3) . . . . ?
C67 N33 C65 N32 -109.1(3) . . . . ?
C68 N33 C65 N32 75.2(3) . . . . ?
C69 N34 C66 N31 111.7(3) . . . . ?
C68 N34 C66 N31 -78.1(3) . . . . ?
C60 N31 C66 N34 -111.5(3) . . . . ?
C61 N31 C66 N34 75.4(3) . . . . ?
C65 N33 C67 O17 -0.3(4) . . . . ?
C68 N33 C67 O17 175.2(3) . . . . ?
C65 N33 C67 N36 -178.0(2) . . . . ?
C68 N33 C67 N36 -2.5(4) . . . . ?
C74 N36 C67 O17 1.5(4) . . . . ?
C70 N36 C67 O17 -174.2(3) . . . . ?
C74 N36 C67 N33 179.3(2) . . . . ?
C70 N36 C67 N33 3.6(4) . . . . ?
C67 N33 C68 N34 89.1(3) . . . . ?
C65 N33 C68 N34 -95.3(3) . . . . ?
C67 N33 C68 C71 -32.7(4) . . . . ?
C65 N33 C68 C71 142.9(2) . . . . ?
C69 N34 C68 N33 -91.3(3) . . . . ?
C66 N34 C68 N33 98.8(3) . . . . ?
C69 N34 C68 C71 30.3(4) . . . . ?
C66 N34 C68 C71 -139.5(3) . . . . ?
C66 N34 C69 O18 -3.7(4) . . . . ?
C68 N34 C69 O18 -173.5(3) . . . . ?
C66 N34 C69 N35 174.3(2) . . . . ?
C68 N34 C69 N35 4.5(4) . . . . ?
C75 N35 C69 O18 -2.7(4) . . . . ?
C70 N35 C69 O18 174.8(3) . . . . ?
C75 N35 C69 N34 179.3(2) . . . . ?
C70 N35 C69 N34 -3.2(4) . . . . ?
C69 N35 C70 N36 89.8(3) . . . . ?
C75 N35 C70 N36 -92.6(3) . . . . ?
C69 N35 C70 C71 -32.7(4) . . . . ?
C75 N35 C70 C71 144.8(2) . . . . ?
C67 N36 C70 N35 -91.3(3) . . . . ?
C74 N36 C70 N35 93.0(3) . . . . ?
C67 N36 C70 C71 30.9(3) . . . . ?
C74 N36 C70 C71 -144.8(2) . . . . ?
N33 C68 C71 C70 62.1(3) . . . . ?
N34 C68 C71 C70 -61.6(3) . . . . ?
N33 C68 C71 C73 -178.7(2) . . . . ?
N34 C68 C71 C73 57.7(3) . . . . ?
N33 C68 C71 C72 -58.0(3) . . . . ?
N34 C68 C71 C72 178.4(2) . . . . ?
N35 C70 C71 C68 62.7(3) . . . . ?
N36 C70 C71 C68 -61.5(3) . . . . ?
N35 C70 C71 C73 -56.3(3) . . . . ?
N36 C70 C71 C73 179.5(2) . . . . ?
N35 C70 C71 C72 -177.3(2) . . . . ?
N36 C70 C71 C72 58.5(3) . . . . ?
C67 N36 C74 N37 102.8(3) . . . . ?
C70 N36 C74 N37 -81.4(3) . . . . ?
C76 N37 C74 N36 -102.1(3) . . . . ?
C77 N37 C74 N36 81.2(3) . . . . ?
C78 N38 C75 N35 98.4(3) . . . . ?
C77 N38 C75 N35 -81.9(3) . . . . ?
C69 N35 C75 N38 -100.2(3) . . . . ?
C70 N35 C75 N38 82.1(3) . . . . ?
C83 N40 C76 O19 10.4(4) . . . . ?
C79 N40 C76 O19 -170.7(3) . . . . ?
C83 N40 C76 N37 -173.5(2) . . . . ?
C79 N40 C76 N37 5.5(4) . . . . ?
C77 N37 C76 O19 170.1(3) . . . . ?
C74 N37 C76 O19 -6.5(4) . . . . ?
C77 N37 C76 N40 -6.0(4) . . . . ?
C74 N37 C76 N40 177.5(2) . . . . ?
C76 N37 C77 N38 91.9(3) . . . . ?
C74 N37 C77 N38 -91.6(3) . . . . ?
C76 N37 C77 C80 -29.9(3) . . . . ?
C74 N37 C77 C80 146.7(2) . . . . ?
C78 N38 C77 N37 -88.7(3) . . . . ?
C75 N38 C77 N37 91.6(3) . . . . ?
C78 N38 C77 C80 33.3(3) . . . . ?
C75 N38 C77 C80 -146.4(2) . . . . ?
C79 N39 C78 O20 175.5(3) . . . . ?
C84 N39 C78 O20 -5.6(4) . . . . ?
C79 N39 C78 N38 -1.4(4) . . . . ?
C84 N39 C78 N38 177.5(2) . . . . ?
C75 N38 C78 O20 3.6(4) . . . . ?
C77 N38 C78 O20 -176.1(3) . . . . ?
C75 N38 C78 N39 -179.5(2) . . . . ?
C77 N38 C78 N39 0.8(4) . . . . ?
C76 N40 C79 N39 -90.9(3) . . . . ?
C83 N40 C79 N39 88.0(3) . . . . ?
C76 N40 C79 C80 31.0(3) . . . . ?
C83 N40 C79 C80 -150.1(2) . . . . ?
C78 N39 C79 N40 89.4(3) . . . . ?
C84 N39 C79 N40 -89.5(3) . . . . ?
C78 N39 C79 C80 -32.4(3) . . . . ?
C84 N39 C79 C80 148.8(2) . . . . ?
N40 C79 C80 C82 177.1(2) . . . . ?
N39 C79 C80 C82 -58.9(3) . . . . ?
N40 C79 C80 C77 -62.3(3) . . . . ?
N39 C79 C80 C77 61.7(3) . . . . ?
N40 C79 C80 C81 57.3(3) . . . . ?
N39 C79 C80 C81 -178.7(2) . . . . ?
N37 C77 C80 C79 61.9(3) . . . . ?
N38 C77 C80 C79 -62.2(3) . . . . ?
N37 C77 C80 C82 -178.8(2) . . . . ?
N38 C77 C80 C82 57.1(3) . . . . ?
N37 C77 C80 C81 -57.4(3) . . . . ?
N38 C77 C80 C81 178.5(2) . . . . ?
C43 N21 C83 N40 -116.9(3) . . . . ?
C44 N21 C83 N40 85.5(3) . . . . ?
C76 N40 C83 N21 93.3(3) . . . . ?
C79 N40 C83 N21 -85.7(3) . . . . ?
C45 N22 C84 N39 116.3(3) . . . . ?
C44 N22 C84 N39 -82.1(3) . . . . ?
C78 N39 C84 N22 -92.6(3) . . . . ?
C79 N39 C84 N22 86.3(3) . . . . ?

_refine_diff_density_max            0.569
_refine_diff_density_min            -0.378
_refine_diff_density_rms            0.073
                                     
_shelx_res_file
;

    a.res created by SHELXL-2014/7


TITL Ustrnul_LU154E in P-1
CELL  0.71073  12.8019  18.7511  26.0731   85.372   79.229   89.774
ZERR    4.000   0.0003   0.0005   0.0006    0.002    0.002    0.002
LATT  1
SFAC C H N O
UNIT 168 216 80 40

FMAP 2
PLAN 20
L.S. 10 0  453
RIGU

SHEL 999 0.82
OMIT  1  1  0 ! 27475.84 107938.20  5.38 0.978 10.38
OMIT  3  4  2 !  1140.18     82.41  9.96 0.027  3.16
OMIT -4  4  4 !  1336.69     12.24 13.11 0.010  2.34
OMIT  2  2  1 !   342.61     0.02  9.68 0.000  5.30
OMIT  1  4  1 !   411.71     0.67 10.36 0.003  4.41
OMIT  3 -3  2 !  1678.14   457.64 10.46 0.073  3.47

BOND
BOND $H
CONF

ACTA
TEMP -153
SIZE 0.17 0.14 0.12

HTAB

ABIN
WGHT    0.089900    6.684200
FVAR       0.32529
O1    4    1.160512    0.662727    0.288506    11.00000    0.01668    0.03094 =
         0.02667   -0.00089   -0.00941   -0.00067
O2    4    0.716068    0.599706    0.231839    11.00000    0.01872    0.02142 =
         0.02702   -0.00348   -0.00686   -0.00133
O3    4    1.268069    0.601771    0.174352    11.00000    0.02753    0.02903 =
         0.02391   -0.00140   -0.00749   -0.00079
O4    4    0.856164    0.540594    0.125760    11.00000    0.02140    0.02209 =
         0.05516   -0.00928   -0.00265   -0.00352
O5    4    1.285845    0.433448    0.205118    11.00000    0.03007    0.03860 =
         0.03236   -0.00396   -0.00868   -0.00930
O6    4    0.874153    0.377385    0.145614    11.00000    0.02376    0.03144 =
         0.03298    0.00707   -0.00313    0.00632
O7    4    1.187897    0.385282    0.332048    11.00000    0.02411    0.12347 =
         0.07428   -0.06708   -0.00040   -0.00251
O8    4    0.768141    0.339106    0.276551    11.00000    0.02637    0.05109 =
         0.03498    0.00849   -0.00038    0.01522
O9    4    1.093737    0.532126    0.373397    11.00000    0.02577    0.04068 =
         0.03174    0.00496   -0.00147    0.00750
O10   4    0.685968    0.482219    0.327487    11.00000    0.02978    0.02146 =
         0.06400   -0.00390   -0.02352    0.00106
O11   4    0.655508    0.773949    0.291656    11.00000    0.01914    0.02447 =
         0.02908    0.00108   -0.00949    0.00070
O12   4    0.210535    0.849839    0.232950    11.00000    0.01976    0.02402 =
         0.02168   -0.00178   -0.00694    0.00391
O13   4    0.592412    0.882164    0.378157    11.00000    0.02436    0.02420 =
         0.04118   -0.00509   -0.00461    0.00350
O14   4    0.194108    0.950074    0.325109    11.00000    0.03000    0.03073 =
         0.02734   -0.00162   -0.01289    0.00727
O15   4    0.685119    1.028626    0.326884    11.00000    0.02681    0.03637 =
         0.03556    0.00874   -0.00041    0.01153
O16   4    0.269266    1.107936    0.275816    11.00000    0.02379    0.03918 =
         0.02287    0.00199   -0.00785    0.00062
O17   4    0.792803    1.015994    0.202107    11.00000    0.02592    0.02737 =
         0.02978   -0.00196   -0.01111    0.00464
O18   4    0.380742    1.085906    0.147253    11.00000    0.02057    0.03402 =
         0.03234   -0.01289   -0.00266   -0.00168
O19   4    0.769106    0.856251    0.174340    11.00000    0.02229    0.02801 =
         0.02643    0.00000   -0.00877    0.00004
O20   4    0.354118    0.931789    0.122437    11.00000    0.01948    0.02034 =
         0.03396    0.00092    0.00039    0.00256
N1    3    0.977941    0.666040    0.315656    11.00000    0.01771    0.02345 =
         0.01891    0.00282   -0.00587    0.00047
N2    3    0.805238    0.640086    0.293191    11.00000    0.01743    0.01675 =
         0.02241   -0.00077   -0.00306    0.00058
N3    3    0.871310    0.666997    0.208977    11.00000    0.01896    0.01835 =
         0.02152    0.00097   -0.00626   -0.00182
N4    3    1.045196    0.690395    0.231347    11.00000    0.01676    0.02314 =
         0.01624    0.00014   -0.00366   -0.00057
N5    3    1.134073    0.661887    0.144815    11.00000    0.02227    0.01838 =
         0.02024   -0.00097   -0.00187   -0.00343
N6    3    0.961550    0.638210    0.122241    11.00000    0.02185    0.01647 =
         0.01799   -0.00167   -0.00286   -0.00171
N7    3    1.028634    0.534630    0.084486    11.00000    0.02456    0.01529 =
         0.02169   -0.00174   -0.00427   -0.00280
N8    3    1.200154    0.557116    0.108287    11.00000    0.02249    0.02101 =
         0.01949   -0.00279   -0.00137    0.00031
N9    3    1.216277    0.428160    0.131259    11.00000    0.02387    0.02063 =
         0.02436   -0.00193   -0.00162   -0.00189
N10   3    1.044800    0.405604    0.106818    11.00000    0.02490    0.01840 =
         0.01852    0.00187   -0.00542    0.00222
N11   3    1.007230    0.317420    0.176519    11.00000    0.02175    0.01843 =
         0.02026   -0.00130   -0.00290    0.00090
N12   3    1.179922    0.338083    0.199637    11.00000    0.02427    0.02323 =
         0.02158   -0.00156   -0.00480   -0.00072
N13   3    1.104457    0.305769    0.292396    11.00000    0.02240    0.02644 =
         0.02439   -0.00001   -0.00316    0.00726
N14   3    0.930642    0.287177    0.269003    11.00000    0.02123    0.02223 =
         0.02424    0.00481   -0.00339    0.00602
N15   3    0.846728    0.330241    0.348094    11.00000    0.02544    0.01805 =
         0.02851    0.00412    0.00165    0.00630
N16   3    1.020070    0.350616    0.370289    11.00000    0.02961    0.02898 =
         0.02319   -0.00130   -0.00223    0.01085
N17   3    0.952002    0.460286    0.409626    11.00000    0.02877    0.02561 =
         0.02080    0.00233   -0.00310    0.00746
N18   3    0.777112    0.437856    0.389627    11.00000    0.02735    0.01541 =
         0.02849    0.00158   -0.00167    0.00225
N19   3    0.757703    0.561792    0.372636    11.00000    0.02160    0.01873 =
         0.02117    0.00319   -0.00332    0.00227
N20   3    0.931766    0.583566    0.393605    11.00000    0.02376    0.02406 =
         0.01976    0.00249   -0.00464    0.00371
N21   3    0.541841    0.759630    0.233908    11.00000    0.01676    0.02076 =
         0.02124   -0.00082   -0.00443    0.00151
N22   3    0.367684    0.788541    0.211049    11.00000    0.01771    0.01801 =
         0.01982   -0.00113   -0.00388    0.00130
N23   3    0.300976    0.797276    0.295081    11.00000    0.01657    0.02347 =
         0.01841    0.00186   -0.00445    0.00240
N24   3    0.472203    0.766361    0.318569    11.00000    0.01728    0.02602 =
         0.02015   -0.00314   -0.00782    0.00059
N25   3    0.428082    0.830027    0.397201    11.00000    0.02287    0.02275 =
         0.02270   -0.00414   -0.00788    0.00227
N26   3    0.256149    0.860247    0.374339    11.00000    0.02270    0.02011 =
         0.02499   -0.00184   -0.00932    0.00146
N27   3    0.280541    0.979822    0.388982    11.00000    0.02080    0.02163 =
         0.02205   -0.00265   -0.00589    0.00443
N28   3    0.452505    0.950152    0.411946    11.00000    0.02033    0.02066 =
         0.02311   -0.00243   -0.00586    0.00275
N29   3    0.523838    1.066008    0.368954    11.00000    0.02494    0.02306 =
         0.01822    0.00122   -0.00542    0.00162
N30   3    0.351342    1.096171    0.346046    11.00000    0.02339    0.02439 =
         0.01954   -0.00135   -0.00532    0.00255
N31   3    0.436962    1.154544    0.266675    11.00000    0.02362    0.02209 =
         0.01752   -0.00096   -0.00638    0.00045
N32   3    0.609824    1.124831    0.289378    11.00000    0.02168    0.02303 =
         0.01820    0.00113   -0.00568   -0.00015
N33   3    0.688191    1.113786    0.197005    11.00000    0.02246    0.02018 =
         0.01876   -0.00021   -0.00617   -0.00038
N34   3    0.514488    1.141738    0.174780    11.00000    0.02314    0.01919 =
         0.01730    0.00023   -0.00470    0.00035
N35   3    0.550143    1.068645    0.105364    11.00000    0.01844    0.01986 =
         0.01696    0.00021   -0.00342   -0.00158
N36   3    0.722008    1.038844    0.128688    11.00000    0.02042    0.01902 =
         0.02105    0.00141   -0.00443   -0.00079
N37   3    0.700847    0.914814    0.107939    11.00000    0.01946    0.02003 =
         0.02140   -0.00036   -0.00491   -0.00106
N38   3    0.529164    0.944701    0.084315    11.00000    0.01851    0.01478 =
         0.02165    0.00077   -0.00371    0.00121
N39   3    0.460355    0.834592    0.124033    11.00000    0.01827    0.01419 =
         0.01766    0.00021   -0.00137    0.00065
N40   3    0.631948    0.804118    0.147133    11.00000    0.01836    0.01838 =
         0.02138   -0.00030   -0.00381    0.00146
C1    1    1.070632    0.671362    0.279557    11.00000    0.02117    0.01604 =
         0.02310   -0.00320   -0.00430   -0.00089
C2    1    0.886931    0.692685    0.293871    11.00000    0.01853    0.01575 =
         0.02130    0.00045   -0.00751   -0.00078
AFIX  13
H2    2    0.856496    0.736092    0.310787    11.00000   -1.20000
AFIX   0
C3    1    0.790256    0.631437    0.243593    11.00000    0.01705    0.01211 =
         0.02067    0.00055   -0.00493    0.00345
C4    1    0.934763    0.710662    0.235165    11.00000    0.02202    0.01451 =
         0.01824   -0.00090   -0.00586    0.00276
AFIX  13
H4    2    0.928122    0.762709    0.224623    11.00000   -1.20000
AFIX   0
C5    1    1.126982    0.710254    0.186453    11.00000    0.01962    0.01694 =
         0.02258   -0.00019   -0.00306   -0.00452
AFIX  23
H5A   2    1.196389    0.711431    0.197928    11.00000   -1.20000
H5B   2    1.112942    0.759159    0.172194    11.00000   -1.20000
AFIX   0
C6    1    0.874622    0.675494    0.153122    11.00000    0.02311    0.01599 =
         0.02009   -0.00099   -0.00774    0.00468
AFIX  23
H6A   2    0.880816    0.727137    0.141502    11.00000   -1.20000
H6B   2    0.806501    0.657825    0.145868    11.00000   -1.20000
AFIX   0
C7    1    1.203657    0.605907    0.144564    11.00000    0.02080    0.02148 =
         0.02096    0.00114    0.00156   -0.00451
C8    1    1.065064    0.673968    0.106484    11.00000    0.02422    0.01770 =
         0.01911    0.00098   -0.00354   -0.00315
AFIX  13
H8    2    1.053160    0.726594    0.101352    11.00000   -1.20000
AFIX   0
C9    1    0.944186    0.569112    0.112274    11.00000    0.02642    0.01599 =
         0.01863    0.00247   -0.00837    0.00046
C10   1    1.133892    0.567855    0.068274    11.00000    0.02818    0.02212 =
         0.01722   -0.00344   -0.00034   -0.00301
AFIX  13
H10   2    1.170685    0.546134    0.036036    11.00000   -1.20000
AFIX   0
C11   1    1.121773    0.648603    0.054521    11.00000    0.03691    0.01871 =
         0.01757    0.00180   -0.00188   -0.00400
C12   1    1.230940    0.685767    0.035999    11.00000    0.04442    0.02529 =
         0.02336    0.00087    0.00687   -0.01154
AFIX 137
H12A  2    1.264132    0.669665    0.001966    11.00000   -1.50000
H12B  2    1.276594    0.673559    0.061619    11.00000   -1.50000
H12C  2    1.221543    0.737719    0.032629    11.00000   -1.50000
AFIX   0
C13   1    1.055026    0.663452    0.012209    11.00000    0.05138    0.02537 =
         0.02244    0.00097   -0.00587   -0.00153
AFIX 137
H13A  2    1.094867    0.649819   -0.021374    11.00000   -1.50000
H13B  2    1.038635    0.714543    0.009192    11.00000   -1.50000
H13C  2    0.988683    0.635539    0.021620    11.00000   -1.50000
AFIX   0
C14   1    1.269834    0.495510    0.108049    11.00000    0.02137    0.02152 =
         0.02697   -0.00321    0.00168    0.00163
AFIX  23
H14A  2    1.326867    0.505716    0.127442    11.00000   -1.20000
H14B  2    1.303937    0.489122    0.071402    11.00000   -1.20000
AFIX   0
C15   1    1.011473    0.462404    0.071391    11.00000    0.03413    0.01707 =
         0.01829    0.00032   -0.00895    0.00240
AFIX  23
H15A  2    1.050581    0.456996    0.035417    11.00000   -1.20000
H15B  2    0.934826    0.455751    0.071316    11.00000   -1.20000
AFIX   0
C16   1    1.229229    0.402231    0.180430    11.00000    0.01908    0.02581 =
         0.02482   -0.00594   -0.00252    0.00081
C17   1    1.157870    0.388332    0.099431    11.00000    0.02175    0.02211 =
         0.02015   -0.00322   -0.00209    0.00075
AFIX  13
H17   2    1.189966    0.400558    0.061753    11.00000   -1.20000
AFIX   0
C18   1    0.969997    0.367987    0.143793    11.00000    0.02564    0.01854 =
         0.01464   -0.00465   -0.00353    0.00343
C19   1    1.119662    0.297671    0.169422    11.00000    0.02087    0.01825 =
         0.02211   -0.00183   -0.00485    0.00380
AFIX  13
H19   2    1.123697    0.245745    0.181014    11.00000   -1.20000
AFIX   0
C20   1    1.169504    0.308375    0.111371    11.00000    0.02826    0.01961 =
         0.01919   -0.00161   -0.00143    0.00160
C21   1    1.286757    0.286088    0.101360    11.00000    0.02995    0.02773 =
         0.02902   -0.00328    0.00001    0.00811
AFIX 137
H21A  2    1.291476    0.234627    0.110613    11.00000   -1.50000
H21B  2    1.325783    0.312535    0.122837    11.00000   -1.50000
H21C  2    1.317777    0.296892    0.064249    11.00000   -1.50000
AFIX   0
C22   1    1.110069    0.265047    0.078219    11.00000    0.03748    0.01877 =
         0.02314   -0.00338   -0.00359    0.00343
AFIX 137
H22A  2    1.119491    0.213839    0.086716    11.00000   -1.50000
H22B  2    1.138518    0.277277    0.040982    11.00000   -1.50000
H22C  2    1.034204    0.276329    0.085765    11.00000   -1.50000
AFIX   0
C23   1    1.196362    0.304211    0.249753    11.00000    0.02009    0.02814 =
         0.02500   -0.00097   -0.00503    0.00826
AFIX  23
H23A  2    1.257051    0.328318    0.260040    11.00000   -1.20000
H23B  2    1.216145    0.253719    0.245140    11.00000   -1.20000
AFIX   0
C24   1    0.931166    0.273728    0.214766    11.00000    0.02159    0.01892 =
         0.02586    0.00217   -0.00374    0.00000
AFIX  23
H24A  2    0.859013    0.282446    0.207225    11.00000   -1.20000
H24B  2    0.947365    0.222663    0.210386    11.00000   -1.20000
AFIX   0
C25   1    1.108415    0.349508    0.331354    11.00000    0.02424    0.04668 =
         0.03119   -0.00949   -0.01204    0.01333
C26   1    1.015727    0.256292    0.294185    11.00000    0.02784    0.01897 =
         0.02720    0.00322   -0.00363    0.00718
AFIX  13
H26   2    1.043731    0.213615    0.275565    11.00000   -1.20000
AFIX   0
C27   1    0.844798    0.320825    0.296836    11.00000    0.02370    0.02032 =
         0.02954    0.00836    0.00221    0.00309
C28   1    0.931407    0.300632    0.374095    11.00000    0.03335    0.02375 =
         0.02230    0.00341    0.00044    0.00898
AFIX  13
H28   2    0.900492    0.289700    0.412061    11.00000   -1.20000
AFIX   0
C29   1    0.969381    0.230821    0.351501    11.00000    0.04110    0.02378 =
         0.02769    0.00528   -0.00168    0.01321
C30   1    1.054421    0.195202    0.378771    11.00000    0.06635    0.03157 =
         0.03084    0.00273   -0.01305    0.02440
AFIX 137
H30A  2    1.023083    0.180231    0.415269    11.00000   -1.50000
H30B  2    1.112690    0.229312    0.377818    11.00000   -1.50000
H30C  2    1.081927    0.153264    0.360684    11.00000   -1.50000
AFIX   0
C31   1    0.877127    0.177227    0.354960    11.00000    0.05446    0.02019 =
         0.03383    0.00281    0.00473    0.00711
AFIX 137
H31A  2    0.843149    0.166730    0.391708    11.00000   -1.50000
H31B  2    0.904637    0.132914    0.340239    11.00000   -1.50000
H31C  2    0.824841    0.197903    0.335138    11.00000   -1.50000
AFIX   0
C32   1    1.020749    0.398205    0.411798    11.00000    0.03469    0.02864 =
         0.02059   -0.00029   -0.00879    0.01385
AFIX  23
H32A  2    1.094545    0.415252    0.409977    11.00000   -1.20000
H32B  2    0.998414    0.370463    0.446036    11.00000   -1.20000
AFIX   0
C33   1    0.756455    0.364981    0.379486    11.00000    0.02777    0.01666 =
         0.03801    0.00273    0.00588   -0.00030
AFIX  23
H33A  2    0.695457    0.364793    0.361091    11.00000   -1.20000
H33B  2    0.735509    0.336287    0.413426    11.00000   -1.20000
AFIX   0
C34   1    0.997776    0.525823    0.390441    11.00000    0.02725    0.03088 =
         0.01591    0.00043   -0.00328    0.00729
C35   1    0.838269    0.450790    0.430516    11.00000    0.03022    0.02499 =
         0.02288    0.00366    0.00183    0.00402
AFIX  13
H35   2    0.828263    0.408655    0.457090    11.00000   -1.20000
AFIX   0
C36   1    0.738855    0.493369    0.361227    11.00000    0.01825    0.01820 =
         0.03459    0.00026   -0.00206    0.00039
C37   1    0.817565    0.576641    0.412931    11.00000    0.02623    0.02139 =
         0.02142    0.00068   -0.00338    0.00469
AFIX  13
H37   2    0.791787    0.622808    0.427171    11.00000   -1.20000
AFIX   0
C38   1    0.795161    0.517468    0.457808    11.00000    0.03525    0.02382 =
         0.02210    0.00092    0.00235    0.00840
C39   1    0.853192    0.530714    0.501945    11.00000    0.05249    0.03555 =
         0.01859    0.00063   -0.00682    0.01845
AFIX 137
H39A  2    0.825281    0.573817    0.518357    11.00000   -1.50000
H39B  2    0.929342    0.537296    0.487848    11.00000   -1.50000
H39C  2    0.842410    0.489580    0.528119    11.00000   -1.50000
AFIX   0
C40   1    0.676702    0.510124    0.480883    11.00000    0.03897    0.02976 =
         0.03175    0.00215    0.01366    0.00777
AFIX 137
H40A  2    0.651588    0.554303    0.496574    11.00000   -1.50000
H40B  2    0.664970    0.469913    0.507822    11.00000   -1.50000
H40C  2    0.637462    0.501439    0.453075    11.00000   -1.50000
AFIX   0
C41   1    0.976328    0.653092    0.370703    11.00000    0.02172    0.02363 =
         0.02193   -0.00058   -0.00697    0.00105
AFIX  23
H41A  2    0.934421    0.691067    0.389067    11.00000   -1.20000
H41B  2    1.049989    0.656792    0.376937    11.00000   -1.20000
AFIX   0
C42   1    0.725737    0.620275    0.339202    11.00000    0.01784    0.01655 =
         0.02454    0.00112   -0.00247    0.00255
AFIX  23
H42A  2    0.659407    0.606359    0.328045    11.00000   -1.20000
H42B  2    0.710078    0.662490    0.359726    11.00000   -1.20000
AFIX   0
C43   1    0.565968    0.768277    0.282016    11.00000    0.02201    0.01529 =
         0.02489    0.00233   -0.01003    0.00079
C44   1    0.431049    0.738945    0.237709    11.00000    0.01866    0.01606 =
         0.02142   -0.00026   -0.00588    0.00011
AFIX  13
H44   2    0.424549    0.689150    0.227424    11.00000   -1.20000
AFIX   0
C45   1    0.286074    0.816314    0.245205    11.00000    0.01747    0.01551 =
         0.02038   -0.00171   -0.00384   -0.00398
C46   1    0.382935    0.744477    0.296404    11.00000    0.01864    0.01702 =
         0.02076    0.00024   -0.00639   -0.00112
AFIX  13
H46   2    0.352577    0.697494    0.313473    11.00000   -1.20000
AFIX   0
C47   1    0.468831    0.765441    0.374174    11.00000    0.02515    0.02035 =
         0.02379    0.00150   -0.01218    0.00359
AFIX  23
H47A  2    0.541628    0.757461    0.381052    11.00000   -1.20000
H47B  2    0.423963    0.724451    0.391827    11.00000   -1.20000
AFIX   0
C48   1    0.222893    0.808282    0.341413    11.00000    0.01645    0.02683 =
         0.01907   -0.00236   -0.00198   -0.00029
AFIX  23
H48A  2    0.207533    0.761909    0.362467    11.00000   -1.20000
H48B  2    0.156131    0.824819    0.330594    11.00000   -1.20000
AFIX   0
C49   1    0.495958    0.887505    0.394346    11.00000    0.02687    0.01924 =
         0.02165   -0.00132   -0.01034    0.00389
C50   1    0.312876    0.835542    0.416007    11.00000    0.02044    0.02545 =
         0.02135   -0.00070   -0.00561    0.00196
AFIX  13
H50   2    0.284469    0.787143    0.430930    11.00000   -1.20000
AFIX   0
C51   1    0.242156    0.931168    0.360764    11.00000    0.01913    0.02856 =
         0.01770   -0.00235   -0.00267    0.00508
C52   1    0.338790    0.957684    0.431446    11.00000    0.02281    0.02406 =
         0.01844   -0.00131   -0.00618    0.00381
AFIX  13
H52   2    0.328790    0.994896    0.457283    11.00000   -1.20000
AFIX   0
C53   1    0.291510    0.886767    0.459290    11.00000    0.02718    0.02413 =
         0.02080   -0.00135   -0.00551   -0.00100
C54   1    0.347314    0.862171    0.504909    11.00000    0.03905    0.02665 =
         0.02297   -0.00080   -0.01014   -0.00147
AFIX 137
H54A  2    0.327068    0.893384    0.533448    11.00000   -1.50000
H54B  2    0.424540    0.864680    0.492831    11.00000   -1.50000
H54C  2    0.325901    0.812774    0.517524    11.00000   -1.50000
AFIX   0
C55   1    0.171743    0.892145    0.481396    11.00000    0.03200    0.03627 =
         0.02410   -0.00454   -0.00298    0.00016
AFIX 137
H55A  2    0.160790    0.925134    0.509171    11.00000   -1.50000
H55B  2    0.143410    0.844733    0.495774    11.00000   -1.50000
H55C  2    0.134805    0.909989    0.453312    11.00000   -1.50000
AFIX   0
C56   1    0.521925    1.011069    0.412154    11.00000    0.02517    0.02172 =
         0.01765   -0.00287   -0.00768    0.00101
AFIX  23
H56A  2    0.595191    0.993468    0.411301    11.00000   -1.20000
H56B  2    0.499577    1.033447    0.445529    11.00000   -1.20000
AFIX   0
C57   1    0.261157    1.056547    0.377739    11.00000    0.01742    0.02742 =
         0.01946   -0.00215   -0.00355    0.00486
AFIX  23
H57A  2    0.200072    1.061331    0.359412    11.00000   -1.20000
H57B  2    0.240979    1.078619    0.411373    11.00000   -1.20000
AFIX   0
C58   1    0.609984    1.069734    0.328426    11.00000    0.02550    0.02247 =
         0.02205    0.00006   -0.00672   -0.00359
C59   1    0.436910    1.117353    0.372269    11.00000    0.02628    0.02228 =
         0.01889   -0.00208   -0.00880    0.00235
AFIX  13
H59   2    0.406129    1.121234    0.410108    11.00000   -1.20000
AFIX   0
C60   1    0.348130    1.118040    0.294991    11.00000    0.02434    0.02180 =
         0.01882   -0.00228   -0.00696    0.00375
C61   1    0.524202    1.176872    0.291438    11.00000    0.02733    0.01835 =
         0.02187   -0.00172   -0.00853   -0.00197
AFIX  13
H61   2    0.554709    1.222836    0.272560    11.00000   -1.20000
AFIX   0
C62   1    0.479769    1.190827    0.348492    11.00000    0.03436    0.01824 =
         0.02123   -0.00027   -0.00860   -0.00081
C63   1    0.568116    1.217508    0.374607    11.00000    0.05186    0.02258 =
         0.02810   -0.00441   -0.01611   -0.00436
AFIX 137
H63A  2    0.603389    1.259403    0.353674    11.00000   -1.50000
H63B  2    0.620145    1.179500    0.377043    11.00000   -1.50000
H63C  2    0.537408    1.230714    0.409833    11.00000   -1.50000
AFIX   0
C64   1    0.392788    1.247117    0.351798    11.00000    0.05214    0.02372 =
         0.03005   -0.00750   -0.01004    0.01357
AFIX 137
H64A  2    0.422734    1.292518    0.333939    11.00000   -1.50000
H64B  2    0.364118    1.253810    0.388637    11.00000   -1.50000
H64C  2    0.335680    1.231155    0.334938    11.00000   -1.50000
AFIX   0
C65   1    0.702786    1.134339    0.248248    11.00000    0.02239    0.02325 =
         0.01853   -0.00062   -0.00328   -0.00795
AFIX  23
H65A  2    0.761372    1.105820    0.259091    11.00000   -1.20000
H65B  2    0.725020    1.185291    0.244533    11.00000   -1.20000
AFIX   0
C66   1    0.438707    1.178778    0.211936    11.00000    0.02633    0.01614 =
         0.02015   -0.00037   -0.00826    0.00418
AFIX  23
H66A  2    0.366688    1.172307    0.204185    11.00000   -1.20000
H66B  2    0.455860    1.230601    0.206786    11.00000   -1.20000
AFIX   0
C67   1    0.736226    1.054026    0.177874    11.00000    0.01562    0.02206 =
         0.02236    0.00165   -0.00363   -0.00032
C68   1    0.627551    1.162469    0.167007    11.00000    0.02375    0.01699 =
         0.02047    0.00198   -0.00464   -0.00271
AFIX  13
H68   2    0.632447    1.211694    0.178609    11.00000   -1.20000
AFIX   0
C69   1    0.476959    1.097568    0.143056    11.00000    0.02486    0.01759 =
         0.01822    0.00234   -0.00637    0.00009
C70   1    0.663617    1.086581    0.096929    11.00000    0.02102    0.02257 =
         0.01793    0.00328   -0.00258   -0.00456
AFIX  13
H70   2    0.694684    1.082407    0.059157    11.00000   -1.20000
AFIX   0
C71   1    0.676849    1.163971    0.108974    11.00000    0.02543    0.01903 =
         0.01766    0.00340   -0.00316   -0.00599
C72   1    0.794288    1.187362    0.098382    11.00000    0.03083    0.02535 =
         0.02540    0.00315   -0.00273   -0.01227
AFIX 137
H72A  2    0.824467    1.184733    0.061172    11.00000   -1.50000
H72B  2    0.833564    1.155625    0.119565    11.00000   -1.50000
H72C  2    0.799758    1.236652    0.107651    11.00000   -1.50000
AFIX   0
C73   1    0.617468    1.215659    0.076048    11.00000    0.03521    0.01813 =
         0.02202    0.00285   -0.00335   -0.00305
AFIX 137
H73A  2    0.642246    1.209499    0.038787    11.00000   -1.50000
H73B  2    0.631315    1.265015    0.082949    11.00000   -1.50000
H73C  2    0.540947    1.205450    0.085394    11.00000   -1.50000
AFIX   0
C74   1    0.772353    0.976310    0.106008    11.00000    0.01811    0.02057 =
         0.02386   -0.00025   -0.00035   -0.00150
AFIX  23
H74A  2    0.830555    0.961519    0.124643    11.00000   -1.20000
H74B  2    0.804729    0.989804    0.068971    11.00000   -1.20000
AFIX   0
C75   1    0.515559    1.020351    0.070497    11.00000    0.02354    0.01708 =
         0.01802    0.00053   -0.00446   -0.00041
AFIX  23
H75A  2    0.439386    1.028893    0.069980    11.00000   -1.20000
H75B  2    0.555651    1.032503    0.034558    11.00000   -1.20000
AFIX   0
C76   1    0.703128    0.859082    0.145485    11.00000    0.01912    0.02137 =
         0.02300   -0.00375   -0.00161    0.00391
C77   1    0.634228    0.913168    0.068277    11.00000    0.01889    0.02043 =
         0.01685   -0.00088   -0.00010    0.00068
AFIX  13
H77   2    0.671385    0.940745    0.035571    11.00000   -1.20000
AFIX   0
C78   1    0.443129    0.905501    0.111643    11.00000    0.01873    0.01783 =
         0.01606   -0.00394   -0.00326    0.00043
C79   1    0.563179    0.800333    0.108579    11.00000    0.02011    0.01898 =
         0.02109   -0.00257   -0.00508    0.00170
AFIX  13
H79   2    0.550092    0.748812    0.104256    11.00000   -1.20000
AFIX   0
C80   1    0.619836    0.835638    0.056105    11.00000    0.02324    0.01926 =
         0.02132   -0.00109   -0.00135    0.00279
C81   1    0.727355    0.800234    0.037628    11.00000    0.02803    0.02778 =
         0.02292   -0.00541   -0.00193    0.00444
AFIX 137
H81A  2    0.715685    0.749720    0.032998    11.00000   -1.50000
H81B  2    0.772369    0.803844    0.063881    11.00000   -1.50000
H81C  2    0.762544    0.824572    0.004229    11.00000   -1.50000
AFIX   0
C82   1    0.552780    0.829437    0.014035    11.00000    0.03211    0.02109 =
         0.01937   -0.00590   -0.00271    0.00097
AFIX 137
H82A  2    0.539606    0.778821    0.010363    11.00000   -1.50000
H82B  2    0.590841    0.852006   -0.019415    11.00000   -1.50000
H82C  2    0.484815    0.853501    0.024131    11.00000   -1.50000
AFIX   0
C83   1    0.623250    0.747902    0.189486    11.00000    0.01580    0.01752 =
         0.02718    0.00004   -0.00255    0.00358
AFIX  23
H83A  2    0.608435    0.701916    0.175924    11.00000   -1.20000
H83B  2    0.692449    0.743596    0.201156    11.00000   -1.20000
AFIX   0
C84   1    0.371155    0.792048    0.155117    11.00000    0.02095    0.01558 =
         0.01886    0.00124   -0.00664   -0.00124
AFIX  23
H84A  2    0.303826    0.812734    0.147598    11.00000   -1.20000
H84B  2    0.375693    0.742789    0.143834    11.00000   -1.20000
AFIX   0
HKLF 4

REM  Ustrnul_LU154E in P-1
REM R1 =  0.0660 for   16699 Fo > 4sig(Fo)  and  0.0913 for all   23295 data
REM   1313 parameters refined using   1446 restraints

END

WGHT      0.0902      6.5481

REM No hydrogen bonds found for HTAB generation

REM Highest difference peak  0.569,  deepest hole -0.378,  1-sigma level  0.073
Q1    1   0.0963  0.7505  0.3795  11.00000  0.05    0.57
Q2    1   0.5035  0.5981  0.2929  11.00000  0.05    0.51
Q3    1   0.5920  1.1076  0.3714  11.00000  0.05    0.50
Q4    1   0.6946  1.2676  0.3288  11.00000  0.05    0.49
Q5    1   0.2863  1.1947  0.3906  11.00000  0.05    0.49
Q6    1   1.1835  0.6226  0.3307  11.00000  0.05    0.49
Q7    1  -0.0001  0.8391  0.2938  11.00000  0.05    0.47
Q8    1   0.9538  0.6780  0.4155  11.00000  0.05    0.46
Q9    1   1.0064  0.6162  0.4198  11.00000  0.05    0.46
Q10   1   0.7246  1.2774  0.1803  11.00000  0.05    0.46
Q11   1   1.0216  0.5735  0.3697  11.00000  0.05    0.45
Q12   1   0.7150  0.8242  0.2325  11.00000  0.05    0.45
Q13   1   0.3445  1.3183  0.3466  11.00000  0.05    0.45
Q14   1   0.8465  0.5469  0.3472  11.00000  0.05    0.45
Q15   1   0.7683  0.5466  0.2783  11.00000  0.05    0.45
Q16   1   0.7386  0.7758  0.3988  11.00000  0.05    0.44
Q17   1   1.1806  0.1729  0.3295  11.00000  0.05    0.44
Q18   1   0.1210  0.8529  0.4974  11.00000  0.05    0.43
Q19   1   1.2951  0.6594  0.2014  11.00000  0.05    0.43
Q20   1   0.5159  1.2884  0.3720  11.00000  0.05    0.43
;
_shelx_res_checksum                 51078
                                     
_shelx_hkl_file
;
   0   0   2 1292.47   14.28
   0   0  -2 6195.80   22.46
   0   0   3   46.61    1.86
   0   0  -3   50.80    3.08
   0   0   3   54.52    3.19
   0   0  -3   51.28    1.96
   0   0  -4 9811.97   28.51
   0   0  -4 9999.00   43.11
   0   0   5  399.86   10.25
   0   0  -5  381.70    9.77
   0   0   5  374.06    6.21
   0   0   6    6.80    1.91
   0   0   6   12.00    3.66
   0   0  -6    8.23    3.29
   0   0  -6    8.02    1.91
   0   0   7  217.39    5.79
   0   0   7  220.84    9.08
   0   0  -7  216.28    6.05
   0   0  -7  217.66    9.02
   0   0  -8 7775.85   36.95
   0   0   8 7916.90   54.47
   0   0   8 7815.24   35.57
   0   0  -8 7792.15   54.63
   0   0   9 2424.56   32.22
   0   0  -9 2364.42   21.87
   0   0  -9 2374.40   32.33
   0   0   9 2361.82   20.76
   0   0 -10 3776.55   43.11
   0   0  10 3718.04   41.62
   0   0 -10 3812.91   28.93
   0   0  11  637.00   18.58
   0   0 -11  612.84   18.69
   0   0  11  619.90   11.84
   0   0 -11  604.40   12.48
   0   0  12  865.65   22.67
   0   0 -12  867.29   15.61
   0   0 -12  819.99   22.51
   0   0  12  862.83   14.44
   0   0 -13  176.78    7.86
   0   0  13  179.06   11.47
   0   0  13  183.84    7.06
   0   0  14   20.92    3.34
   0   0  14   26.44    6.48
   0   0 -14   17.84    5.73
   0   0 -14   19.54    3.77
   0   0 -15  419.45   12.58
   0   0  15  436.33   11.52
   0   0  15  445.46   18.37
   0   0  16  326.17   10.30
   0   0 -16  314.92   11.47
   0   0  16  325.85   16.56
   0   0 -17  139.51    8.12
   0   0  17  136.97   11.41
   0   0  17  132.51    7.01
   0   0  18  249.46    9.66
   0   0 -18  250.89   11.10
   0   0  18  253.60   15.77
   0   0  19  684.46   26.01
   0   0 -19  678.14   18.37
   0   0  19  666.30   15.77
   0   0  20   13.01    7.06
   0   0 -20    0.96    3.88
   0   0 -20    2.34    6.95
   0   0  20    5.20    3.34
   0   0  21   17.09    7.01
   0   0 -21   33.76    5.47
   0   0 -21   21.24    8.65
   0   0  21   30.37    4.67
   0   0  22  130.54   14.07
   0   0  22  115.47    7.86
   0   0  23 1024.01   35.89
   0   0  23 1042.38   21.66
   0   0  24   30.21    6.64
   0   0 -24   34.56   10.83
   0   0  24   34.35    5.41
   0   0  24   34.77   10.14
   0   0  25   30.84   11.47
   0   0  25   19.43    5.57
   0   0 -25   27.23   11.47
   0   0  25   15.77    4.46
   0   0  26   47.41    8.44
   0   0  26   56.96   12.90
   0   0  26   46.03    6.42
   0   0 -26   63.49   14.28
   0   0 -27  130.86   17.41
   0   0  27  137.87   11.68
   0   0  27  146.10   17.73
   0   0  27  125.34    9.13
   0   0 -28   92.00   15.82
   0   0  28  103.84   10.83
   0   0  28  104.16   17.52
   0   0  28   88.76    8.12
   0   0 -29  114.67   18.58
   0   0  29  104.69   10.88
   0   0  29   95.61    8.44
   0   0  30   42.20    9.02
   0   0 -30   60.36   18.63
   0   0  30   35.83    6.37
   0   0  31  101.34   10.94
   0   0 -31  110.05   21.87
   0   0  31  106.76    9.72
   0   0  32  120.62   11.63
   0   0  32  126.72   10.19
   0   0  33   62.75   11.63
   0  -1  33    6.16    8.65
   0  -1  32   33.76    7.86
   0  -1  32   61.58   10.41
   0  -1  31    8.49    7.27
   0   1 -31   23.36   18.42
   0  -1  31   11.68    5.89
   0  -1  30   40.88    7.43
   0  -1  30   43.27    8.87
   0   1 -30   31.80   16.40
   0   1 -29   16.03   13.27
   0  -1  29    0.69    6.58
   0  -1  29    2.55    5.47
   0  -1  28   10.83   11.15
   0   1 -28    5.89   12.26
   0  -1  28   26.54    7.22
   0  -1  28   22.30    5.73
   0   1 -27   23.04   12.58
   0  -1  27   16.56    6.95
   0  -1  27   16.30    5.41
   0  -1  27    8.33    9.72
   0  -1  26   -6.11    9.13
   0  -1  26    7.01    5.73
   0  -1  26    8.97    4.25
   0  -1  25   10.62    9.34
   0  -1  25   13.01    4.83
   0  -1  25    7.96    6.11
   0  -1  24  180.39   12.21
   0  -1  24  189.95   10.25
   0  -1  24  163.56   16.51
   0   1 -24  200.14   19.85
   0  -1  23   43.80    5.95
   0   1 -23   26.70    9.66
   0  -1  23   44.17   10.30
   0  -1  23   41.30    6.80
   0  -1  22   35.04    6.42
   0   1 -22   29.09    9.50
   0  -1  22   39.82    5.47
   0  -1  22   40.93   10.03
   0  -1  21    6.80    4.14
   0  -1  21    6.85    6.64
   0   1 -21    9.87    7.43
   0   1 -20  164.73   14.81
   0  -1  20  174.34   14.65
   0  -1  20  185.33    9.40
   0  -1  19   45.81    9.29
   0   1 -19   37.69    8.23
   0  -1  19   47.83    5.26
   0  -1  18  319.11   17.94
   0  -1  18  307.64   11.25
   0   1 -18  286.51   17.15
   0  -1  17   14.39    5.52
   0   1 -17   26.28    7.49
   0  -1  17   25.48    4.14
   0   1 -17   24.74    4.62
   0   1 -16  218.99   14.44
   0  -1  16  236.40    9.50
   0   1 -16  235.44   10.62
   0  -1  16  203.75   13.59
   0   1 -15   14.49    3.82
   0  -1  15   12.69    3.29
   0   1 -15   10.88    5.73
   0  -1  15   17.73    6.00
   0   1 -14  211.24    9.18
   0  -1  14  203.64    8.39
   0   1 -14  193.50   12.48
   0  -1  14  203.48   12.63
   0  -1  13  276.80   14.12
   0   1 -13  269.21   13.86
   0   1 -13  297.66   10.35
   0  -1  13  297.77    9.56
   0   1 -12 3276.04   44.70
   0  -1  12 3329.02   29.89
   0   1 -12 3395.11   32.60
   0   1 -11 1181.25   18.47
   0  -1  11 1241.83   26.92
   0  -1  11 1141.70   16.78
   0   1 -11 1157.79   25.75
   0   1 -10 1456.46   19.59
   0   1 -10 1437.40   27.23
   0  -1  10 1529.88   28.03
   0  -1  10 1471.54   18.69
   0   1  -9  186.39    7.06
   0  -1   9  167.97    6.42
   0  -1   9  205.08   10.19
   0   1  -9  208.05   10.67
   0   1  -8 2977.37   34.88
   0  -1   8 2910.53   34.14
   0   1  -8 2914.25   25.00
   0   1  -7   69.70    4.62
   0   1  -7   61.32    6.05
   0  -1   7   61.05    3.98
   0  -1   7   53.41    5.89
   0   1  -6  184.00    5.89
   0  -1   6  183.58    5.52
   0   1  -6  189.84    8.28
   0  -1   6  204.28    8.55
   0  -1   5 1276.81   18.53
   0  -1   5 1220.22   13.01
   0   1  -5 1295.87   18.74
   0   1  -5 1231.53   13.59
   0  -1   4   66.20    4.51
   0  -1   4   58.18    3.19
   0   1  -4   60.63    4.67
   0   1  -4   48.63    2.97
   0   1  -3   40.98    3.40
   0  -1   3   39.02    2.44
   0  -1   3   37.37    3.40
   0  -1   2   40.08    3.08
   0   1  -2   52.08    2.34
   0   1  -2   41.09    2.92
   0  -1   2   49.96    2.34
   0   1   2    5.89    1.38
   0  -1  -2    5.89    1.27
   0   1   3  140.31    4.83
   0  -1  -3  134.10    4.46
   0   1   3  156.61    2.81
   0  -1  -3  165.00    2.92
   0   1   4   60.57    3.98
   0  -1  -4   57.23    2.23
   0  -1  -4   48.26    3.72
   0   1   4   57.87    2.12
   0   1   5 1356.76   10.51
   0  -1  -5 1312.06   10.83
   0   1   5 1366.37   17.73
   0   1   6   87.81    3.24
   0   1   6   88.60    5.63
   0  -1  -6   65.09    5.20
   0  -1  -6   82.98    3.40
   0   1   7   65.24    3.13
   0  -1  -7   50.70    3.03
   0   1   7   59.14    5.57
   0   1   8 3000.30   33.02
   0   1   8 2993.24   19.91
   0  -1  -8 3058.01   21.34
   0   1   9  965.24   12.16
   0   1   9  902.01   19.48
   0  -1  -9  971.24   13.17
   0  -1 -10  789.63   12.58
   0   1  10  773.75   11.52
   0   1  11 1316.15   26.01
   0  -1 -11 1328.09   17.04
   0   1  11 1291.20   15.61
   0   1  12 2678.32   38.91
   0  -1 -12 2607.24   25.38
   0   1  12 2564.88   22.83
   0  -1 -13   43.90    4.25
   0  -1 -13   30.21    6.53
   0   1  13   43.48    3.82
   0  -1 -14  119.98   10.14
   0  -1 -14  130.01    6.90
   0   1  14  122.63    5.84
   0   1  14  138.72   10.56
   0  -1 -15   26.44    3.93
   0  -1 -15   31.59    6.53
   0   1  15   30.21    3.50
   0   1  15   23.62    6.11
   0   1  16  177.42   12.42
   0  -1 -16  170.15   12.85
   0  -1 -16  178.00    8.60
   0   1  16  177.21    7.49
   0   1  17   19.64    6.64
   0  -1 -17   24.58    7.54
   0   1  17   20.07    3.34
   0  -1 -17   25.69    4.30
   0   1  18  320.76   10.46
   0  -1 -18  298.62   17.68
   0   1  18  296.81   17.04
   0  -1 -18  336.15   12.32
   0   1  19   44.49    9.13
   0  -1 -19   45.66    5.63
   0  -1 -19   37.21    8.49
   0   1  19   37.32    4.41
   0   1  20  264.38   10.25
   0  -1 -20  229.39   17.09
   0  -1 -20  277.91   11.89
   0   1  20  253.17   17.31
   0   1  21    1.91    3.13
   0  -1 -21    5.79    3.77
   0   1  21   11.04    7.49
   0  -1 -21   11.15    7.91
   0  -1 -22    1.75    4.14
   0   1  22   -2.55    7.33
   0  -1 -22   -3.03    7.75
   0   1  22   -3.19    3.66
   0  -1 -23   27.61    5.89
   0   1  23   19.59    4.41
   0   1  23   27.50    9.13
   0  -1 -23   27.45    9.29
   0  -1 -24  106.60   13.91
   0   1  24  105.27   13.91
   0   1  24  105.22    7.70
   0   1  25    8.23    8.60
   0   1  25   -2.18    3.82
   0  -1 -25   16.62   11.20
   0  -1 -26   25.48   10.56
   0   1  26   18.90    5.10
   0   1  26   14.02    9.40
   0  -1 -27  -10.99   11.15
   0   1  27    5.68    4.51
   0   1  27    0.96   10.41
   0   1  27    6.90    6.32
   0  -1 -28   51.65   14.65
   0   1  28   45.12    8.44
   0   1  28   38.01    6.21
   0   1  28   41.04   12.63
   0   1  29    4.25    5.10
   0   1  29    2.18    6.32
   0  -1 -30   16.93   13.01
   0   1  30   21.13    7.96
   0   1  30   21.39    5.63
   0  -1 -31   17.25   14.86
   0   1  31    2.18    6.95
   0   1  31    4.51    4.83
   0   1  32   26.01    6.11
   0   1  32   21.13    8.07
   0  -2  33   10.51    8.23
   0  -2  32    6.32    6.32
   0  -2  32    4.14    8.23
   0  -2  31   11.10    6.48
   0  -2  31    3.29    7.33
   0  -2  30   34.35    7.27
   0  -2  30   37.53    8.23
   0  -2  29    4.09    5.47
   0  -2  29    6.80    7.38
   0  -2  28    3.61    4.99
   0  -2  28   -6.16    6.95
   0  -2  27    5.26    4.99
   0  -2  27   -1.01   10.30
   0   2 -27   -6.42   13.17
   0  -2  27    6.11    6.11
   0  -2  26   -0.32    4.62
   0   2 -26   -6.16   12.00
   0  -2  26    0.42    6.00
   0  -2  26    6.69    8.87
   0   2 -25   -3.40   12.05
   0  -2  25   21.66    7.22
   0  -2  25   18.63    5.26
   0  -2  25   20.44   10.67
   0  -2  24    6.80    5.84
   0  -2  24    3.77    4.14
   0  -2  24   -0.27    8.12
   0  -2  23   24.47    8.81
   0   2 -23   19.43    9.61
   0  -2  23   26.86    6.80
   0  -2  23   34.03    5.79
   0  -2  22   15.45    5.73
   0  -2  22    6.85    7.86
   0  -2  22   13.70    4.46
   0   2 -22    5.26    9.02
   0  -2  21   34.03    6.58
   0  -2  21   25.00    8.33
   0   2 -21   25.27   10.41
   0  -2  21   33.92    5.31
   0  -2  20  373.74   13.48
   0   2 -20  322.77   21.34
   0  -2  20  342.36   14.81
   0  -2  20  341.51   19.80
   0  -2  19    7.01    4.51
   0   2 -19    1.49    6.64
   0  -2  19    3.19    3.61
   0  -2  19   11.04    6.90
   0  -2  18   -1.38    4.46
   0  -2  18    8.65    3.93
   0  -2  18   11.15    6.21
   0   2 -18    7.17    7.22
   0  -2  17   37.00    5.04
   0   2 -17   41.94    8.44
   0  -2  17   42.79    7.80
   0  -2  17   30.15    5.36
   0  -2  16   13.75    6.48
   0  -2  16    3.56    3.24
   0   2 -16    6.64    6.16
   0   2 -15  679.52   24.26
   0  -2  15  633.23   23.36
   0  -2  15  715.89   16.35
   0   2 -14  441.48   19.06
   0  -2  14  423.11   12.42
   0  -2  14  379.36   17.57
   0   2 -13  426.19   17.78
   0  -2  13  371.67   16.40
   0  -2  13  423.69   12.21
   0   2 -12  686.79   22.56
   0  -2  12  614.17   14.07
   0  -2  11   65.72    7.38
   0   2 -11   85.68    8.28
   0  -2  11   70.77    5.31
   0  -2  10  234.81    8.44
   0   2 -10  239.64   12.53
   0  -2   9  838.57   14.76
   0   2  -9  819.20   20.65
   0  -2   8   70.39    4.72
   0   2  -8   75.44    7.43
   0  -2   7   16.19    3.40
   0  -2   7   10.88    4.14
   0  -2   7   14.60    2.92
   0   2  -7   16.24    4.88
   0  -2   6 1400.24   16.93
   0  -2   6 1417.92   17.36
   0   2  -6 1393.76   24.47
   0   2  -5  200.51    9.61
   0  -2   5  190.48    6.42
   0  -2   5  181.61    6.69
   0   2  -4 1159.06   19.75
   0  -2   4 1292.58   15.29
   0   2  -3 1012.33   12.69
   0   2  -3  909.28   14.81
   0  -2   2 2953.64   18.95
   0   2  -2 2821.98   18.53
   0  -2   1   25.11    2.02
   0   2  -1   25.64    2.07
   0   2   0   60.41    2.55
   0  -2   0   65.99    2.65
   0   2   1   39.76    2.02
   0  -2  -1   40.24    1.91
   0  -2  -2 1176.95    9.08
   0   2   2 1184.60    9.40
   0   2   3  899.78    8.12
   0  -2  -3  889.27    7.86
   0  -2  -4 3818.59   28.19
   0  -2  -4 4313.00   18.26
   0   2   4 3960.71   28.35
   0   2   4 4550.35   18.21
   0  -2  -5  418.01   10.78
   0   2   5  466.69    6.37
   0   2   5  401.77   10.56
   0  -2  -5  405.11    6.21
   0   2   6 1013.97   17.57
   0  -2  -6  977.82   10.30
   0   2   6 1037.12   10.09
   0  -2  -6  952.02   16.93
   0  -2  -7   23.73    4.67
   0   2   7   32.86    2.55
   0   2   7   32.33    5.20
   0  -2  -7   28.99    2.50
   0   2   8  116.58    4.09
   0  -2  -8   93.17    6.80
   0   2   8  114.46    7.33
   0  -2  -8  113.13    4.35
   0  -2  -9  367.10    8.02
   0  -2  -9  349.26   13.01
   0   2   9  350.48    7.22
   0   2  10   28.03    5.52
   0   2  10   22.19    2.71
   0  -2 -10   32.28    5.95
   0  -2 -10   19.27    2.87
   0   2  11  529.92   16.93
   0  -2 -11  539.74   10.72
   0   2  11  544.68    9.93
   0  -2 -11  495.84   17.09
   0   2  12  208.74   11.63
   0  -2 -12  177.90    6.69
   0   2  12  196.48    6.48
   0  -2 -12  201.63   12.37
   0  -2 -13   36.84    4.14
   0  -2 -13   47.19    7.96
   0   2  13   45.18    4.03
   0  -2 -14 1157.15   18.00
   0   2  14 1130.34   27.82
   0   2  14 1179.87   16.62
   0  -2 -14 1104.01   28.19
   0  -2 -15   79.63    9.08
   0   2  15   71.46    4.88
   0  -2 -15   68.38    5.31
   0  -2 -16  184.21    8.23
   0   2  16  191.06   13.32
   0   2  16  196.74    7.70
   0  -2 -16  198.44   13.86
   0   2  17  106.97    6.00
   0   2  17  114.99   10.94
   0  -2 -17  113.45    7.01
   0  -2 -17   96.41   10.72
   0  -2 -18   -0.32    3.13
   0   2  18    2.18    5.79
   0   2  18    3.61    2.60
   0  -2 -18   -1.27    5.89
   0  -2 -19   15.34    7.27
   0   2  19    9.08    3.13
   0   2  19   17.78    7.06
   0  -2 -19    4.83    3.50
   0   2  20  199.40   15.71
   0  -2 -20  183.47    9.66
   0  -2 -20  183.10   15.87
   0   2  20  174.71    8.12
   0   2  21  100.55    6.69
   0  -2 -21  110.00    8.18
   0  -2 -21  111.43   13.38
   0   2  21  113.08   13.22
   0  -2 -22   13.91    4.46
   0   2  22    4.03    3.34
   0   2  22    6.42    7.17
   0  -2 -22   13.17    8.49
   0  -2 -23   67.47    7.11
   0  -2 -23   56.86   11.41
   0   2  23   49.05   10.03
   0   2  23   65.88    6.05
   0  -2 -24   -0.58    4.25
   0   2  24  -11.89    8.87
   0   2  24   -0.42    3.45
   0  -2 -24   -2.12    8.44
   0  -2 -25   -0.64    8.76
   0  -2 -25   -5.15    5.15
   0   2  25   -5.41    9.45
   0   2  25   -7.27    3.88
   0  -2 -26    4.46    9.66
   0   2  26    6.95    4.19
   0   2  26    2.34    8.39
   0   2  27   -0.32    9.13
   0  -2 -27  -12.90    9.87
   0   2  27    3.34    4.03
   0  -2 -28   -7.17   10.72
   0   2  28   -7.75   10.03
   0   2  28   -1.86    4.30
   0   2  29    1.49    4.35
   0   2  29    8.55    6.69
   0  -2 -29   21.34   12.58
   0   2  30   28.14    5.79
   0   2  30   23.57    7.33
   0   2  31    5.04    7.22
   0  -2 -31   10.72   13.27
   0   2  31    0.42    4.94
   0   2  32    1.70    7.22
   0   2  32    4.46    5.52
   0  -3  33    9.40    8.65
   0  -3  32   10.46    7.17
   0  -3  32   -9.45    8.23
   0  -3  31   16.03    7.17
   0  -3  31    5.84    7.75
   0   3 -31   -1.22   15.13
   0  -3  30    2.81    7.49
   0  -3  30   -4.46    6.00
   0   3 -30   14.49   14.55
   0  -3  29    3.03    5.73
   0  -3  29   -4.62    7.33
   0   3 -29    8.55   13.64
   0  -3  28   10.78    5.84
   0   3 -28   -9.40   13.01
   0  -3  28    8.92    7.49
   0  -3  27   26.28    7.43
   0  -3  27   26.38   12.58
   0  -3  27   22.19    6.16
   0  -3  26   21.61    7.27
   0  -3  26    4.72    9.34
   0  -3  26   11.47    5.47
   0   3 -26   12.26   11.94
   0  -3  25    3.61    8.92
   0   3 -25    9.29   11.84
   0  -3  25   17.47    6.32
   0  -3  25   13.27    5.26
   0  -3  24   12.95   10.09
   0  -3  24   15.71    6.37
   0  -3  24    9.45    5.20
   0  -3  23   11.31    5.20
   0   3 -23    1.80   11.68
   0  -3  23    2.50    5.68
   0  -3  23   -0.16    7.75
   0  -3  22  280.78   19.80
   0  -3  22  319.80   15.40
   0  -3  22  295.27   13.38
   0   3 -22  281.36   23.04
   0  -3  21  252.91   12.26
   0  -3  21  245.16   13.54
   0  -3  21  226.37   17.36
   0  -3  20  100.23    8.02
   0  -3  20   97.36    8.65
   0  -3  20   99.06   12.58
   0   3 -20   95.93   15.13
   0  -3  19   28.24    5.89
   0   3 -19   33.98   10.56
   0  -3  19   19.38    7.38
   0  -3  19   37.21    5.52
   0  -3  18  327.66   14.33
   0  -3  18  317.89   19.01
   0   3 -18  284.55   19.59
   0  -3  18  314.28   12.53
   0  -3  17   17.84    7.54
   0  -3  17   18.53    4.41
   0   3 -17   12.48    7.54
   0  -3  17   10.83    4.51
   0   3 -16   13.22    7.70
   0  -3  16   18.69    4.83
   0  -3  16   16.99    7.33
   0  -3  16   20.49    4.46
   0  -3  15   25.59    4.88
   0   3 -15   20.65    7.75
   0  -3  15   29.30    6.80
   0  -3  15   26.92    4.35
   0  -3  14  148.80    8.18
   0   3 -14  115.73   11.94
   0  -3  14  121.57   10.94
   0  -3  14  129.59    8.39
   0  -3  13   71.99    8.44
   0  -3  13   81.38    6.11
   0  -3  13   73.10    6.37
   0   3 -13   64.77    8.71
   0  -3  12   54.47    5.79
   0  -3  12   56.54    5.15
   0  -3  12   58.87    7.96
   0  -3  11  177.37   11.36
   0  -3  11  130.70    7.54
   0  -3  11  169.19    8.71
   0   3 -11  135.32   10.94
   0   3 -10  175.88   11.94
   0  -3  10  199.93   11.31
   0  -3  10  184.21    8.60
   0  -3  10  182.04    7.80
   0  -3   9  160.06   10.51
   0   3  -9  146.15   10.88
   0  -3   9  127.09    7.06
   0  -3   9  139.46    7.64
   0  -3   8 1347.52   20.17
   0  -3   8 1343.70   25.80
   0  -3   8 1269.54   19.22
   0  -3   7  625.48   13.17
   0  -3   7  591.24   16.78
   0   3  -7  604.56   17.94
   0  -3   7  634.56   13.32
   0  -3   6  123.59    6.26
   0   3  -6   94.34    7.91
   0  -3   6  110.26    5.89
   0  -3   6  106.87    8.81
   0  -3   5  307.11    8.60
   0  -3   5  256.09   11.52
   0   3  -5  291.24   11.52
   0   3  -4    4.30    5.31
   0  -3   4    2.55    4.41
   0   3  -4    0.21    2.87
   0  -3   4    2.55    2.55
   0   3  -3 1758.74   18.21
   0  -3   3 1844.05   18.42
   0   3  -2  267.61    7.49
   0  -3   2  210.28    6.48
   0   3  -1  711.27   10.41
   0  -3   1  686.85   10.25
   0  -3   0    3.19    1.75
   0   3   0    4.41    1.75
   0  -3  -1   -1.86    1.59
   0   3   1   -0.11    1.59
   0  -3  -2  727.73    9.02
   0   3   2  711.64    9.24
   0  -3  -3 1245.65   11.41
   0   3   3 1261.57   11.68
   0  -3  -4  534.70    7.64
   0   3   4  567.67    8.07
   0  -3  -5  124.54    6.58
   0   3   5  153.16    4.41
   0  -3  -5  152.63    4.35
   0   3   6  414.72   11.73
   0   3   6  447.37    7.27
   0  -3  -6  416.47    7.27
   0  -3  -6  412.92   12.21
   0  -3  -7  359.72   12.00
   0   3   7  374.16   11.84
   0  -3  -7  375.01    7.17
   0   3   7  386.48    6.95
   0  -3  -8  139.46    4.94
   0   3   8  171.42    9.08
   0  -3  -8  158.89    9.13
   0   3   8  144.19    4.78
   0   3   9 1298.20   23.62
   0   3   9 1354.69   14.12
   0  -3  -9 1246.23   23.73
   0  -3  -9 1286.63   14.28
   0  -3 -10  352.08    7.96
   0  -3 -10  332.17   13.43
   0   3  10  351.17    7.59
   0   3  10  343.11   13.17
   0  -3 -11   82.39    7.86
   0  -3 -11   83.93    4.57
   0   3  11   84.25    4.19
   0   3  11   91.79    8.02
   0   3  12  203.33   11.57
   0   3  12  177.15    6.11
   0  -3 -12  183.47   11.04
   0  -3 -12  197.70    6.85
   0  -3 -13    4.14    2.39
   0  -3 -13    2.71    4.78
   0   3  13    4.14    2.07
   0   3  13    8.55    4.88
   0   3  14  107.56    9.24
   0   3  14  101.61    5.10
   0  -3 -14  110.79    5.89
   0  -3 -14  106.92    9.98
   0  -3 -15    0.37    2.55
   0   3  15    2.07    2.12
   0   3  15   -0.37    4.88
   0  -3 -15    8.39    5.79
   0  -3 -16    3.98    5.63
   0  -3 -16    0.00    2.60
   0   3  16    4.99    2.50
   0   3  16    3.08    5.73
   0   3  17   15.02    3.08
   0  -3 -17   10.88    3.13
   0  -3 -17   20.07    7.01
   0   3  17   18.42    6.05
   0  -3 -18  186.18   14.02
   0   3  18  196.90    7.75
   0   3  18  197.91   14.12
   0  -3 -18  187.51    8.65
   0   3  19   54.20    4.67
   0  -3 -19   48.31    5.26
   0   3  19   53.46    9.18
   0  -3 -20   72.15    6.48
   0  -3 -20   57.76    9.98
   0   3  20   70.82    5.36
   0  -3 -21   36.79    9.45
   0   3  21   26.28    4.03
   0   3  21   32.38    9.18
   0  -3 -21   30.31    5.04
   0  -3 -22  210.65   10.62
   0   3  22  210.23    9.18
   0  -3 -22  226.58   17.63
   0   3  22  203.86   16.19
   0   3  23  252.59   10.14
   0  -3 -23  273.30   20.28
   0  -3 -23  280.30   12.69
   0   3  23  275.84   19.32
   0  -3 -24    8.23    4.88
   0   3  24    3.82    8.23
   0   3  24   10.51    3.93
   0  -3 -24    2.65    8.39
   0  -3 -25    2.18    4.83
   0  -3 -25    0.11    8.44
   0   3  25  -17.94   10.09
   0   3  25   -1.59    3.77
   0   3  26    6.95    4.46
   0  -3 -26    9.08    5.15
   0   3  26   12.53   10.56
   0  -3 -26    9.24   10.09
   0  -3 -27    4.46    4.99
   0   3  27    5.52    4.03
   0  -3 -27    4.67    9.77
   0   3  27   20.60   10.51
   0   3  28   14.65    4.78
   0  -3 -28   12.00   11.15
   0   3  28   17.78   12.26
   0   3  29    7.38    4.41
   0  -3 -29    8.02   12.00
   0  -3 -30   -4.41   12.26
   0   3  30   -1.86    4.51
   0   3  30    1.96    6.58
   0   3  31    8.28    5.57
   0  -3 -31   -7.64   13.48
   0   3  31   -0.69    6.85
   0   3  32    7.06    7.49
   0  -4  33   -4.41    9.13
   0  -4  32   33.92    9.82
   0  -4  32   30.15    8.23
   0  -4  31   21.34    7.33
   0  -4  31   20.70    9.13
   0  -4  30   12.63    7.33
   0  -4  30   19.64    7.06
   0   4 -30   27.98   16.51
   0  -4  29   46.19    9.34
   0  -4  29   40.98    7.91
   0  -4  28    1.59    6.69
   0  -4  28   -8.81    6.00
   0  -4  27   -0.53   10.51
   0  -4  27   -3.40    6.48
   0  -4  27   11.73    5.89
   0   4 -27   -0.53   11.84
   0  -4  26    7.54    5.57
   0  -4  26    8.18    6.16
   0  -4  26   21.87   12.05
   0  -4  25  215.96   12.79
   0  -4  25  208.37   19.27
   0  -4  25  208.42   13.43
   0   4 -25  216.92   22.08
   0  -4  24   24.74   10.25
   0  -4  24    8.44    5.47
   0  -4  24    7.22    5.73
   0   4 -24   21.29   13.48
   0  -4  23    3.98    5.41
   0  -4  23    6.32    9.02
   0  -4  23   -1.11    4.88
   0  -4  22   56.06    7.96
   0   4 -22   49.32   12.00
   0  -4  22   58.34    7.49
   0  -4  22   62.17   12.21
   0  -4  21   29.94    9.72
   0  -4  21   17.89    5.31
   0   4 -21   17.94   10.67
   0  -4  21   12.37    5.41
   0  -4  20   29.62    9.45
   0  -4  20   33.13    5.79
   0  -4  20   28.19    6.32
   0   4 -20   34.03   11.25
   0  -4  19   19.85    8.71
   0   4 -19   -3.40    9.18
   0  -4  19   11.41    4.51
   0  -4  19    6.69    4.83
   0  -4  18   11.57    4.83
   0   4 -18   11.84    8.07
   0  -4  18    9.87    4.25
   0  -4  18    1.59    6.21
   0   4 -17   27.61    9.34
   0  -4  17   14.49    4.35
   0  -4  17   15.45    5.26
   0  -4  17   30.63    8.44
   0  -4  16  133.20   12.32
   0  -4  16  117.85    8.87
   0   4 -16  113.08   12.48
   0  -4  16  122.21    8.12
   0  -4  15   66.78    8.92
   0   4 -15   67.79   10.56
   0  -4  15   81.70    6.69
   0  -4  15   73.58    7.22
   0  -4  14   -7.64    5.10
   0   4 -14   -3.56    6.00
   0  -4  14    4.57    3.50
   0  -4  14   -0.21    3.82
   0  -4  13   10.41    6.21
   0  -4  13    4.94    4.09
   0   4 -13   10.35    7.22
   0  -4  13   14.44    3.98
   0  -4  12  773.91   23.52
   0  -4  12  773.38   17.63
   0  -4  12  784.90   18.63
   0   4 -12  760.48   25.59
   0  -4  11  167.65    8.87
   0  -4  11  177.63    8.76
   0  -4  11  192.71   12.21
   0   4 -10   55.05    8.55
   0  -4  10   55.58    5.57
   0  -4  10   56.96    5.57
   0  -4  10   69.60    8.07
   0   4  -9 1130.13   27.34
   0  -4   9 1123.65   25.38
   0  -4   9 1174.94   20.12
   0  -4   9 1165.54   20.17
   0  -4   8   35.89    4.62
   0  -4   8   41.62    4.83
   0  -4   8   41.67    6.58
   0   4  -8   47.35    6.80
   0   4  -7 2346.15   35.09
   0  -4   7 2330.60   26.60
   0  -4   7 2302.04   25.96
   0  -4   6 1312.86   19.01
   0  -4   6 1348.85   26.92
   0   4  -6 1270.60   19.70
   0  -4   5  824.77   20.12
   0   4  -5  806.93   15.13
   0  -4   5  803.59   14.60
   0  -4   4  601.85   17.09
   0  -4   4  581.68   11.84
   0   4  -4  571.22   12.16
   0  -4   3  245.64    7.64
   0   4  -3  242.45    7.64
   0  -4   2  103.10    4.99
   0   4  -2  106.44    5.31
   0   4  -1    9.77    2.71
   0  -4   1   15.24    2.81
   0   4   0 3825.18   25.59
   0  -4   0 3727.07   25.00
   0  -4  -1 4009.55   24.85
   0   4   1 3934.85   25.32
   0   4   2   18.79    2.65
   0  -4  -2   20.17    2.60
   0  -4  -3   36.37    2.92
   0   4   3   37.11    3.03
   0  -4  -4  445.62    7.75
   0   4   4  461.12    7.96
   0   4   5  697.25    9.77
   0  -4  -5  688.49    9.61
   0  -4  -6  317.99    6.74
   0   4   6  333.50    6.80
   0  -4  -7 2344.72   29.84
   0  -4  -7 2369.73   18.32
   0   4   7 2385.49   18.69
   0   4   8 2504.46   19.22
   0  -4  -8 2486.31   32.44
   0  -4  -9  219.94    6.21
   0   4   9  212.09   10.30
   0   4   9  225.25    6.11
   0  -4  -9  220.63   10.72
   0   4  10  237.83    6.53
   0   4  10  322.08   13.22
   0  -4 -10  243.78    6.80
   0  -4 -10  303.13   12.95
   0   4  11   74.38    3.98
   0  -4 -11   73.10    4.19
   0   4  11   67.63    7.27
   0  -4 -11   64.34    7.22
   0   4  12  312.90    7.96
   0  -4 -12  323.89   14.39
   0  -4 -12  327.55    8.44
   0   4  12  309.34   13.96
   0  -4 -13  680.37   21.45
   0   4  13  656.43   20.44
   0  -4 -13  665.45   12.53
   0   4  13  645.01   11.63
   0   4  14   42.36    6.64
   0  -4 -14   46.24    7.11
   0  -4 -14   53.67    4.25
   0   4  14   50.17    3.88
   0   4  15    1.38    2.07
   0  -4 -15    0.90    2.55
   0   4  15   -3.29    4.57
   0  -4 -15    1.27    4.78
   0   4  16    2.87    4.94
   0  -4 -16    7.11    2.97
   0   4  16    6.11    2.50
   0  -4 -16    8.71    6.05
   0  -4 -17   56.33    4.83
   0  -4 -17   61.95    8.87
   0   4  17   50.70    8.60
   0   4  17   50.22    4.30
   0  -4 -18  147.16    7.59
   0   4  18  137.55    6.58
   0  -4 -18  144.72   13.17
   0   4  18  118.60   11.63
   0   4  19    4.46    5.57
   0  -4 -19    4.51    3.24
   0  -4 -19   13.70    7.27
   0   4  19    9.93    3.03
   0  -4 -20    2.44    6.26
   0   4  20   14.55    7.17
   0  -4 -20    5.89    3.24
   0   4  20   11.10    3.19
   0   4  21   32.54    4.19
   0   4  21   36.74    8.97
   0  -4 -21   35.14    5.04
   0  -4 -21   30.15    8.65
   0  -4 -22   53.67   10.88
   0   4  22   45.02    8.97
   0  -4 -22   50.01    5.68
   0   4  22   40.29    4.72
   0  -4 -23  110.26    7.96
   0   4  23  108.03   13.27
   0   4  23  102.46    6.69
   0  -4 -23  103.20   13.54
   0  -4 -24    5.10    4.72
   0   4  24   -0.85    8.55
   0  -4 -24   -8.28    8.18
   0   4  24   -0.48    3.34
   0   4  25   31.91    9.82
   0  -4 -25   46.82    6.64
   0   4  25   37.00    4.94
   0  -4 -25   34.98   11.73
   0  -4 -26  242.29   12.53
   0   4  26  258.01   10.99
   0   4  26  265.81   20.76
   0  -4 -26  264.59   21.77
   0  -4 -27    0.85    5.15
   0   4  27   14.23    9.45
   0   4  27    4.35    3.98
   0  -4 -27   18.85   10.41
   0   4  28   28.35   12.05
   0  -4 -28   18.26    5.41
   0  -4 -28   12.48   10.94
   0   4  28   23.36    5.15
   0  -4 -29  -12.32   11.94
   0   4  29   12.90    4.67
   0   4  30   24.47    5.15
   0  -4 -30   35.94   14.55
   0  -4 -31   44.81   14.71
   0   4  31   54.36    6.69
   0   4  31   55.26    9.08
   0   4  32   11.47    7.70
   0  -5  33   -3.08    9.45
   0  -5  32    4.72    7.49
   0  -5  32   -2.65    8.55
   0  -5  31   19.22    9.02
   0  -5  31   -6.26    7.17
   0   5 -30   15.55   16.14
   0  -5  30    5.04    7.17
   0  -5  30   -3.50    7.91
   0  -5  29   -8.55    6.95
   0  -5  29   -3.24    7.49
   0   5 -29    1.06   13.48
   0   5 -28  -15.24   13.64
   0  -5  28    1.75    6.85
   0  -5  28   -3.88    6.16
   0   5 -27   -3.72   12.10
   0  -5  27    8.07    5.73
   0  -5  27   -6.85    7.33
   0   5 -26    7.59   11.41
   0  -5  26   14.86    7.54
   0  -5  26   15.98    6.58
   0  -5  26   -3.08    9.50
   0  -5  25    3.08    5.41
   0  -5  25   -1.75    6.21
   0  -5  25   -3.24   10.72
   0   5 -25    6.80   11.79
   0  -5  24   30.42    6.74
   0   5 -24   14.28   10.67
   0  -5  24   33.71   12.21
   0  -5  24   27.29    7.22
   0  -5  23   34.98    6.95
   0  -5  23   43.69   12.53
   0  -5  23   35.62    7.75
   0  -5  22   22.72   10.67
   0  -5  22   18.74    5.68
   0  -5  22    8.71    5.63
   0  -5  21    1.49    8.18
   0   5 -21    5.41    8.92
   0  -5  21    1.75    4.57
   0  -5  21    1.70    4.83
   0   5 -20   32.01   10.56
   0  -5  20   25.22    8.55
   0  -5  20   29.15    5.95
   0  -5  20   33.92    6.21
   0  -5  19   50.27    6.74
   0   5 -19   65.24   13.01
   0  -5  19   41.73    9.45
   0  -5  19   41.30    6.74
   0  -5  18   50.43    6.74
   0  -5  18   61.58    6.95
   0   5 -18   34.77    9.61
   0  -5  18   61.63   10.03
   0  -5  17   50.27    9.77
   0  -5  17   59.67    7.22
   0   5 -17   50.65   10.35
   0  -5  17   52.03    6.48
   0   5 -16    6.64    7.01
   0  -5  16    0.27    3.56
   0  -5  16    2.39    4.51
   0  -5  16    7.64    6.16
   0  -5  15  414.40   14.86
   0  -5  15  419.76   15.24
   0   5 -15  437.18   22.19
   0  -5  15  435.11   20.86
   0  -5  14   93.27   10.25
   0  -5  14   84.30    7.06
   0   5 -14   77.08   10.67
   0  -5  14   63.65    6.58
   0  -5  13   11.31    3.93
   0  -5  13    9.18    5.20
   0   5 -13   -5.10    7.59
   0  -5  13    5.31    3.93
   0  -5  12   31.64    5.04
   0  -5  12   55.00    8.92
   0   5 -12   47.41    8.76
   0  -5  12   43.48    5.73
   0  -5  11 1191.13   22.67
   0   5 -11 1165.70   30.53
   0  -5  11 1196.28   23.04
   0  -5  11 1269.96   30.37
   0  -5  10  940.13   26.01
   0  -5  10  874.78   18.95
   0   5 -10  910.13   26.33
   0  -5  10  897.82   19.64
   0   5  -9  548.50   20.28
   0  -5   9  567.67   20.49
   0  -5   9  520.74   14.28
   0  -5   9  513.94   14.76
   0  -5   8   21.71    4.09
   0   5  -8   26.12    7.06
   0  -5   8   19.75    6.53
   0  -5   8   17.52    4.09
   0  -5   7  224.67   12.79
   0   5  -7  197.91    8.97
   0  -5   7  205.82    8.65
   0  -5   6  306.26   10.09
   0  -5   6  346.61   14.55
   0   5  -6  309.55   10.62
   0  -5   5 1156.20   18.47
   0  -5   5 1220.54   25.38
   0   5  -5 1125.25   19.11
   0   5  -4 1105.97   17.89
   0  -5   4 1128.01   17.68
   0   5  -3 4412.59   34.19
   0  -5   3 3900.40   31.32
   0  -5   2   10.83    3.03
   0   5  -2   17.63    3.56
   0   5  -1    1.96    2.65
   0  -5   1    2.55    2.44
   0  -5   0   79.47    4.57
   0   5   0   76.92    4.67
   0  -5  -1  157.83    5.95
   0   5   1  162.71    6.11
   0  -5  -2   25.38    3.03
   0   5   2   29.84    3.19
   0  -5  -3   38.70    3.13
   0   5   3   37.43    3.24
   0   5   4 5140.26   30.10
   0  -5  -4 5173.50   29.46
   0   5   5 1570.81   16.46
   0  -5  -5 1601.60   16.30
   0  -5  -6  980.26   12.90
   0   5   6 1018.75   13.27
   0  -5  -7  278.66   11.68
   0   5   7  245.69    6.74
   0  -5  -7  242.72    6.58
   0  -5  -8  339.02    7.80
   0   5   8  351.76    7.91
   0  -5  -8  326.97   12.53
   0   5   9   19.80    2.60
   0  -5  -9   23.89    5.31
   0  -5  -9   18.00    2.60
   0   5  10  799.82   12.48
   0  -5 -10  777.52   20.92
   0  -5 -10  779.01   12.37
   0  -5 -11 1131.56   15.29
   0  -5 -11 1096.84   25.69
   0   5  11 1066.32   14.49
   0   5  12  780.12   22.03
   0  -5 -12  767.81   13.22
   0  -5 -12  789.25   22.62
   0   5  12  733.41   12.42
   0  -5 -13  317.46   15.24
   0  -5 -13  334.72    9.02
   0   5  13  297.24   14.65
   0   5  13  327.55    8.65
   0  -5 -14    5.36    2.39
   0  -5 -14   10.35    6.11
   0   5  14    7.54    2.28
   0   5  14    3.56    4.78
   0  -5 -15  201.73   13.64
   0   5  15  214.05   13.27
   0   5  15  212.24    7.22
   0  -5 -15  214.37    8.02
   0   5  16  492.65   20.07
   0  -5 -16  462.71   20.07
   0  -5 -16  474.34   12.00
   0   5  16  447.26   10.83
   0  -5 -17    5.89    2.71
   0   5  17   13.17    6.80
   0   5  17    7.22    2.76
   0  -5 -17    5.63    5.57
   0   5  18   68.27    8.92
   0  -5 -18   69.65    5.52
   0   5  18   68.48    4.88
   0  -5 -18   69.33   10.09
   0  -5 -19   26.65    4.30
   0   5  19   26.76    8.02
   0   5  19   28.67    3.88
   0  -5 -19   26.54    7.38
   0  -5 -20   55.32    5.63
   0   5  20   43.00    4.72
   0   5  20   57.07    9.45
   0   5  21   -8.07    7.54
   0  -5 -21  -10.14    7.43
   0  -5 -21    0.69    3.72
   0   5  21    4.35    3.08
   0  -5 -22   12.05    4.09
   0   5  22   13.32    3.66
   0   5  22    6.53    7.17
   0  -5 -22   10.72    8.44
   0  -5 -23   25.00    4.94
   0   5  23   30.84    9.93
   0   5  23   22.99    4.35
   0  -5 -23   13.38    8.33
   0  -5 -24   59.03   12.69
   0   5  24   62.38    6.05
   0  -5 -24   50.91    6.26
   0   5  24   71.72   14.07
   0   5  25   14.23    9.18
   0  -5 -25   13.01    9.98
   0  -5 -25   22.40    5.52
   0   5  25   16.83    4.09
   0  -5 -26   15.55    5.95
   0  -5 -26    8.92    9.98
   0   5  26    0.27    8.65
   0   5  26   11.36    3.82
   0   5  27   17.47   11.04
   0   5  27   -1.43    3.72
   0  -5 -27   -4.78    5.20
   0  -5 -27    5.41   10.88
   0  -5 -28   10.41   12.16
   0   5  28    6.42   10.56
   0   5  28    2.18    3.93
   0  -5 -28    3.50    4.94
   0  -5 -29    2.02    5.47
   0   5  29    3.24    4.25
   0  -5 -29   -7.17   11.63
   0  -5 -30    3.08    5.47
   0   5  30    4.30    4.41
   0  -5 -30   -9.77   13.54
   0   5  31   10.35    4.72
   0  -5 -31    0.00   12.90
   0  -6  33   -4.09    9.93
   0  -6  32   -2.28    9.13
   0  -6  31   13.32    8.81
   0  -6  31    0.74    8.02
   0   6 -30    4.67   14.86
   0  -6  30   -3.24    7.86
   0  -6  30   -3.19    7.80
   0   6 -29    8.92   15.08
   0  -6  29   -5.73    8.02
   0  -6  29    1.75    6.95
   0  -6  28   33.07    7.86
   0  -6  28   47.14    9.98
   0  -6  27    2.23    6.26
   0  -6  27    3.34    6.80
   0   6 -27    1.59   13.75
   0  -6  26   79.63    9.77
   0  -6  26   92.64   17.25
   0   6 -26   69.76   16.03
   0  -6  26   97.42   11.25
   0  -6  25   43.11    8.55
   0  -6  25   32.81    7.38
   0  -6  25   11.47   10.56
   0   6 -25   42.84   14.17
   0  -6  24   49.53    8.18
   0   6 -24   37.16   11.89
   0  -6  24   42.15   11.68
   0  -6  24   34.08    8.02
   0  -6  23   71.51    8.44
   0  -6  23   71.30    9.56
   0   6 -23   80.43   15.50
   0  -6  23   86.11   14.81
   0  -6  22    3.98    8.65
   0  -6  22   11.89    5.95
   0  -6  22    7.86    5.57
   0  -6  21   53.46    7.59
   0  -6  21   46.61    7.54
   0  -6  21   61.53   12.10
   0   6 -21   44.22   12.00
   0   6 -20   22.93    9.72
   0  -6  20   28.56    8.65
   0  -6  20   25.85    6.69
   0  -6  20   26.28    6.05
   0  -6  19  156.82   11.25
   0  -6  19  162.24   10.94
   0  -6  19  174.29   16.14
   0   6 -19  149.23   15.93
   0  -6  18   26.49    6.05
   0  -6  18   38.44    6.48
   0  -6  18   44.86    9.77
   0  -6  17  141.80    9.82
   0  -6  17  144.13   10.46
   0  -6  17  135.05   13.48
   0   6 -17  140.05   14.23
   0  -6  16   12.95    4.62
   0  -6  16   13.43    5.10
   0  -6  16    5.04    6.32
   0   6 -16    4.78    6.90
   0  -6  15    6.00    6.53
   0   6 -15   12.63    8.23
   0  -6  15    5.68    4.57
   0  -6  15   16.83    5.10
   0  -6  14  182.57   10.35
   0   6 -14  169.30   14.49
   0  -6  14  196.80   11.20
   0  -6  14  187.24   14.28
   0   6 -13   27.71    7.70
   0  -6  13   28.19    5.04
   0  -6  13   33.45    7.96
   0  -6  13   23.68    4.83
   0   6 -12   -3.88    7.22
   0  -6  12   -5.63    6.90
   0  -6  12    2.18    3.72
   0  -6  12    6.80    4.03
   0  -6  11   77.56    9.50
   0   6 -11   87.54   11.36
   0  -6  11   88.07    7.27
   0  -6  11   94.71    7.70
   0  -6  10  637.74   17.73
   0   6 -10  653.72   25.80
   0  -6  10  634.08   17.15
   0  -6   9  612.90   16.35
   0  -6   9  602.92   16.56
   0  -6   9  575.10   23.04
   0  -6   8  871.70   18.90
   0  -6   8  832.10   25.85
   0  -6   7   69.28    6.05
   0  -6   7   73.42    9.13
   0   6  -7   65.35    6.26
   0   6  -6  484.64   14.33
   0  -6   6  445.03   17.52
   0  -6   6  502.37   13.86
   0  -6   5   65.03    5.57
   0   6  -5   74.48    6.16
   0  -6   5   64.02    8.55
   0   6  -4  589.59   14.44
   0  -6   4  625.11   14.39
   0  -6   3  745.46   15.18
   0   6  -3  745.93   15.98
   0  -6   2  435.42   11.57
   0   6  -2  315.50   10.25
   0  -6   1 1680.33   21.93
   0   6  -1 1639.66   21.61
   0  -6   0   36.74    4.19
   0   6   0   36.15    4.25
   0   6   1  322.19    9.50
   0  -6  -1  316.72    9.02
   0  -6  -2 1359.15   17.63
   0   6   2 1462.56   19.22
   0   6   3  914.81   14.76
   0  -6  -3  901.22   14.23
   0  -6  -4   81.70    5.10
   0   6   4   82.18    5.26
   0   6   5 1167.61   16.19
   0  -6  -5 1130.29   15.45
   0  -6  -6   19.70    2.92
   0   6   6   20.86    3.03
   0  -6  -7    7.38    2.76
   0   6   7   14.55    3.24
   0  -6  -8  189.20   10.83
   0   6   8  205.56    7.17
   0  -6  -8  214.95    6.80
   0  -6  -9  726.08   20.81
   0  -6  -9  759.52   13.01
   0   6   9  743.92   13.01
   0  -6 -10   46.77    7.75
   0  -6 -10   28.45    3.88
   0   6  10   35.83    4.03
   0   6  11   40.77    4.30
   0  -6 -11   37.43    3.98
   0  -6 -12   34.14    3.82
   0   6  12   36.95    3.93
   0  -6 -12   40.77    7.59
   0   6  13   45.39    4.03
   0  -6 -13   47.25    4.14
   0  -6 -13   44.86    7.06
   0  -6 -14   22.46    3.19
   0   6  14   19.54    3.19
   0  -6 -14   14.33    6.00
   0   6  15  178.43    7.27
   0  -6 -15  186.60    7.54
   0  -6 -15  177.95   13.17
   0  -6 -16    5.47    2.87
   0  -6 -16   -0.37    5.68
   0   6  16    1.86    2.23
   0  -6 -17   -3.93    2.97
   0   6  17    2.87    5.52
   0   6  17    3.40    2.50
   0  -6 -17   -0.53    5.84
   0  -6 -18  135.59   12.63
   0   6  18  128.95    6.69
   0   6  18  138.24   12.63
   0  -6 -18  136.91    7.43
   0   6  19   36.84    4.30
   0  -6 -19   22.19    7.27
   0  -6 -19   27.71    4.51
   0   6  19   35.20    8.76
   0   6  20   70.87   11.04
   0  -6 -20   70.34   11.20
   0   6  20   55.32    4.88
   0  -6 -20   72.78    6.21
   0   6  21  218.30   16.78
   0   6  21  209.01    8.92
   0  -6 -21  226.10   18.26
   0  -6 -21  220.47   10.09
   0   6  22   79.42   11.84
   0   6  22   98.27    6.48
   0  -6 -22   91.79   13.22
   0  -6 -22   99.75    7.43
   0  -6 -23   14.12    8.76
   0   6  23   15.18    8.28
   0  -6 -23   10.46    4.30
   0   6  23    8.87    3.50
   0  -6 -24   72.73   13.54
   0   6  24   87.49   13.38
   0  -6 -24   88.66    7.38
   0   6  24   93.06    6.74
   0   6  25   59.72   11.63
   0  -6 -25   53.62   12.90
   0  -6 -25   67.37    7.11
   0   6  25   63.28    6.05
   0  -6 -26   15.93    5.20
   0  -6 -26   21.50    9.93
   0   6  26   14.92    4.57
   0   6  26   -4.19   10.14
   0  -6 -27  146.79   18.16
   0  -6 -27  135.21   10.03
   0   6  27  150.98    8.76
   0   6  27  125.66   16.56
   0  -6 -28   12.10   11.84
   0   6  28    2.39    4.25
   0  -6 -28    5.41    5.68
   0  -6 -29   13.43    6.11
   0   6  29    2.65    4.09
   0  -6 -29    9.50   12.10
   0  -6 -30   18.05    6.53
   0   6  30   15.82    4.94
   0  -6 -30   21.29   12.74
   0  -6 -31  -12.53   12.90
   0   6  31    3.45    5.04
   0  -6 -31   -8.81    6.26
   0  -7  33   35.99   12.21
   0  -7  32   -4.41    9.87
   0  -7  31   42.31   10.67
   0  -7  31   19.91    8.02
   0  -7  30   11.73    7.91
   0  -7  30   19.48    8.97
   0  -7  29   18.10    8.65
   0  -7  29   11.94    7.75
   0   7 -29   28.40   17.36
   0   7 -28   50.49   16.78
   0  -7  28   57.92   10.51
   0  -7  28   69.60   10.72
   0  -7  27   24.74    8.33
   0  -7  27   32.54    8.65
   0   7 -26    1.33   11.57
   0  -7  26   21.18    7.96
   0  -7  26    3.93    6.80
   0  -7  25   -5.68   12.32
   0  -7  25   15.34    7.33
   0   7 -25   19.22   13.27
   0  -7  25   28.40    7.22
   0  -7  24    1.06    6.16
   0  -7  24    7.91   10.67
   0   7 -24    0.32   11.79
   0  -7  24   18.47    6.26
   0  -7  23    4.78    5.73
   0  -7  23   -4.14    9.77
   0  -7  23    3.13    6.16
   0   7 -23    7.01   10.46
   0  -7  22   16.51    6.21
   0  -7  22   18.95    9.29
   0  -7  22   11.04    6.05
   0   7 -22    0.11   11.10
   0  -7  21   78.20    9.40
   0   7 -21   75.81   15.13
   0  -7  21   81.12    9.18
   0  -7  21   95.50   14.17
   0  -7  20   31.80    7.27
   0   7 -20   41.04   11.68
   0  -7  20   38.38   10.94
   0  -7  20   31.06    6.42
   0  -7  19   11.79    8.97
   0   7 -19    0.32    9.29
   0  -7  19   -6.64    5.52
   0  -7  19    8.87    5.84
   0   7 -18  135.27   15.77
   0  -7  18  186.71   17.04
   0  -7  18  166.64   11.31
   0  -7  18  162.77   11.84
   0  -7  17  154.01   15.34
   0   7 -17  181.77   18.79
   0  -7  17  145.99   11.04
   0  -7  17  153.05   10.88
   0  -7  16    2.92    4.72
   0  -7  16    9.02    7.27
   0  -7  16   -0.21    4.19
   0   7 -16   -7.80    8.07
   0  -7  15   -1.54    4.30
   0  -7  15   10.30    7.86
   0  -7  15   -2.02    4.57
   0   7 -15    3.66    7.43
   0   7 -14  126.83   14.55
   0  -7  14  112.71    8.92
   0  -7  14  122.37   12.74
   0  -7  14  122.69    9.61
   0  -7  13   16.62    7.06
   0   7 -13   32.65   10.46
   0  -7  13   17.04    4.88
   0  -7  13   14.12    4.67
   0  -7  12  127.94    9.29
   0  -7  12  123.32    9.08
   0  -7  12  107.77   11.89
   0  -7  11    0.80    4.09
   0  -7  11    0.37    3.72
   0  -7  10  275.79   19.27
   0  -7  10  287.52   12.74
   0  -7  10  291.13   12.26
   0  -7   9   99.01    7.80
   0  -7   9   90.62   10.88
   0   7  -8  198.07   10.67
   0  -7   8  175.45   14.97
   0  -7   8  211.87   10.62
   0   7  -7  338.70   13.38
   0  -7   7  299.73   16.40
   0  -7   7  346.45   12.48
   0   7  -6  196.37   10.14
   0  -7   6  190.53    9.45
   0  -7   5 1267.31   22.40
   0   7  -5 1219.21   23.31
   0   7  -4  476.99   14.49
   0  -7   4  528.54   14.55
   0   7  -3  750.77   17.31
   0  -7   3  755.12   16.56
   0  -7   2  602.33   14.71
   0   7  -2  576.27   15.18
   0   7  -1   36.10    4.67
   0  -7   1   37.32    4.35
   0   7   0   26.86    4.25
   0  -7   0   25.27    3.93
   0  -7  -1   30.15    3.93
   0   7   1   32.70    4.19
   0  -7  -2   52.29    4.51
   0   7   2   51.76    4.78
   0  -7  -3    6.64    2.34
   0   7   3    8.18    2.97
   0  -7  -4  958.34   16.24
   0   7   4 1007.71   16.51
   0   7   5  453.16   11.41
   0  -7  -5  424.65   10.88
   0  -7  -6 2461.99   24.47
   0   7   6 2520.07   25.80
   0  -7  -7  116.58    6.00
   0   7   7  116.37    6.26
   0  -7  -8   21.08    3.77
   0   7   8   23.68    4.25
   0   7   9  153.37    6.74
   0  -7  -9  149.55   10.41
   0  -7  -9  157.46    6.48
   0   7  10  580.04   12.58
   0  -7 -10  568.73   12.16
   0  -7 -10  528.33   19.11
   0  -7 -11  151.57    6.90
   0   7  11  176.04    7.22
   0  -7 -11  156.45   11.57
   0  -7 -12    2.07    2.44
   0  -7 -12    3.88    5.26
   0   7  12    3.72    2.71
   0  -7 -13   52.08    4.41
   0  -7 -13   53.94    8.23
   0   7  13   55.21    4.57
   0  -7 -14   67.74    5.10
   0   7  14   71.35    4.94
   0  -7 -14   59.88    8.55
   0  -7 -15  263.21    9.18
   0   7  15  272.55    8.97
   0  -7 -15  280.20   16.14
   0   7  16   23.41    3.56
   0  -7 -16   19.01    3.50
   0  -7 -16   30.79    7.59
   0  -7 -17    9.08    6.48
   0   7  17   16.93    3.61
   0  -7 -17   14.92    3.34
   0   7  18   28.56    4.19
   0  -7 -18   29.52    7.49
   0  -7 -18   31.00    4.41
   0  -7 -19  272.07   10.41
   0   7  19  269.53    9.98
   0  -7 -19  265.01   18.21
   0   7  20    6.69    3.45
   0  -7 -20   15.08    8.07
   0  -7 -20    9.61    3.93
   0   7  21    3.72    3.08
   0  -7 -21   -0.48    7.27
   0  -7 -21    0.16    3.40
   0   7  22   73.58    6.32
   0  -7 -22   77.24   12.26
   0  -7 -22   84.62    6.95
   0  -7 -23  164.89   17.57
   0  -7 -23  154.11    9.18
   0   7  23  151.83    8.28
   0  -7 -24    1.91    9.08
   0   7  24    3.19    3.82
   0  -7 -24   -0.96    4.03
   0   7  25    8.76    3.98
   0  -7 -25    2.23    9.29
   0  -7 -25    7.11    4.35
   0  -7 -26    2.02    9.45
   0  -7 -26   16.78    5.31
   0   7  26   14.65    4.30
   0   7  27   -2.23    3.98
   0  -7 -27    4.88   10.03
   0  -7 -27   14.86    5.95
   0   7  28    2.87    4.41
   0  -7 -28    4.14   12.16
   0  -7 -28    1.75    5.26
   0   7  29   90.20    7.80
   0  -7 -29   90.94   17.04
   0  -7 -29   79.37    8.55
   0  -7 -30   64.18   16.03
   0   7  30   39.76    5.89
   0  -7 -30   53.62    7.86
   0  -7 -31    8.49   14.12
   0  -8  32    4.03    9.40
   0  -8  31   -0.27    9.18
   0  -8  30  -10.46    8.65
   0  -8  30    3.82    8.81
   0   8 -29   18.74   17.25
   0  -8  29   22.83    9.18
   0  -8  29   36.05   10.56
   0   8 -28    8.49   15.66
   0  -8  28    5.63    7.80
   0  -8  28    8.92    8.60
   0  -8  27   61.74    9.93
   0  -8  27   67.63   10.94
   0   8 -27   81.01   19.11
   0  -8  26    0.11    7.43
   0  -8  26    6.26    7.27
   0  -8  25    2.44   11.89
   0  -8  25   12.74    7.38
   0  -8  25   19.16    7.49
   0  -8  24    6.42    6.85
   0   8 -24   18.10   12.85
   0  -8  24   27.18   12.58
   0  -8  24    6.48    6.05
   0  -8  23   74.00    9.98
   0   8 -23   75.23   16.67
   0  -8  23   51.49   13.01
   0  -8  23   66.89    9.66
   0  -8  22   -4.62    6.16
   0  -8  22    1.59    6.11
   0   8 -22   -9.34   11.31
   0  -8  22    8.02   10.14
   0  -8  21  123.64   16.30
   0  -8  21  132.93   11.10
   0  -8  21  140.31   11.79
   0   8 -21  139.46   18.47
   0  -8  20  252.80   20.60
   0   8 -20  232.58   22.35
   0  -8  20  241.39   14.60
   0  -8  20  224.30   13.64
   0  -8  19    7.54    5.15
   0  -8  19    3.82    5.41
   0  -8  19    0.32    8.33
   0   8 -19    0.16   10.56
   0  -8  18  271.49   19.75
   0  -8  18  272.07   15.18
   0   8 -18  309.18   24.15
   0  -8  18  282.43   15.02
   0  -8  17  101.03   13.01
   0  -8  17  117.32   10.19
   0  -8  17  109.57    9.93
   0  -8  16   33.66    6.74
   0  -8  16   30.95    6.58
   0  -8  15    4.88    7.22
   0  -8  15   -1.33    4.35
   0  -8  15    0.64    4.62
   0  -8  14  104.21   12.00
   0  -8  14  114.19    9.24
   0  -8  14  118.97    9.66
   0  -8  13   51.55    6.74
   0  -8  13   68.38   10.72
   0  -8  13   57.65    7.01
   0  -8  12  142.96    9.77
   0  -8  12  141.64   13.80
   0  -8  12  150.18   10.51
   0  -8  11  259.49   18.21
   0  -8  11  259.28   12.42
   0  -8  11  251.37   12.79
   0  -8  10  307.06   18.90
   0  -8  10  363.44   14.17
   0  -8  10  345.33   14.12
   0   8  -9   80.11    7.59
   0  -8   9   77.77    7.43
   0   8  -8   58.02    6.80
   0  -8   8   45.07    8.49
   0  -8   8   53.14    6.16
   0   8  -7    8.33    4.30
   0  -8   7    1.27    6.05
   0  -8   7    8.23    3.77
   0   8  -6   52.19    6.26
   0  -8   6   49.53    5.68
   0   8  -5   63.49    6.58
   0  -8   5   67.79    6.53
   0  -8   4 1652.46   25.91
   0   8  -4 1980.38   28.83
   0  -8   3   35.83    4.57
   0   8  -3   49.64    5.79
   0  -8   2   95.13    6.80
   0   8  -2  103.73    7.17
   0  -8   1  357.28   11.47
   0   8  -1  363.65   12.10
   0   8   0 1132.57   20.28
   0  -8   0 1103.74   19.22
   0   8   1 1110.38   19.48
   0  -8  -1 1069.56   19.01
   0   8   2 1496.70   22.56
   0  -8  -2 1391.90   20.60
   0   8   3   59.25    5.41
   0  -8  -3   58.29    5.26
   0  -8  -4    7.43    3.03
   0   8   4    4.14    3.08
   0  -8  -5  117.75    6.32
   0   8   5  141.48    6.90
   0   8   6 2190.45   25.48
   0  -8  -6 2094.57   24.10
   0   8   7  267.93    9.50
   0  -8  -7  274.09    8.87
   0   8   8   20.07    3.45
   0  -8  -8   20.07    3.29
   0   8   9  114.24    6.11
   0  -8  -9  114.93    5.89
   0  -8 -10   14.92    3.03
   0  -8 -10   16.14    5.26
   0   8  10   13.59    3.03
   0  -8 -11  541.60   12.42
   0  -8 -11  530.13   19.59
   0   8  11  542.08   12.63
   0  -8 -12  139.09   11.20
   0  -8 -12  110.90    6.11
   0   8  12  124.23    6.69
   0   8  13  322.51   10.14
   0  -8 -13  299.15    9.61
   0  -8 -13  342.52   17.20
   0  -8 -14   64.24    5.20
   0   8  14   66.89    5.20
   0  -8 -14   76.82    9.66
   0  -8 -15  121.68    6.69
   0   8  15  108.25    6.32
   0  -8 -15  113.71   11.41
   0  -8 -16   54.89    4.94
   0  -8 -16   45.07    8.76
   0   8  16   49.74    4.67
   0  -8 -17   28.67    3.98
   0  -8 -17   25.54    7.43
   0   8  17   23.73    3.98
   0  -8 -18   72.84   10.67
   0   8  18   66.47    5.41
   0  -8 -18   72.84    5.73
   0  -8 -19  359.03   20.65
   0  -8 -19  349.74   11.73
   0   8  19  316.77   10.78
   0  -8 -20  176.78   16.03
   0  -8 -20  172.64    8.87
   0   8  20  163.72    8.23
   0  -8 -21   49.90   10.56
   0  -8 -21   45.18    5.52
   0   8  21   43.11    5.04
   0   8  22  130.86    7.75
   0  -8 -22  128.68   14.76
   0  -8 -22  125.23    8.28
   0  -8 -23   68.48    6.64
   0  -8 -23   77.14   13.59
   0   8  23   79.42    6.48
   0  -8 -24    5.26    9.50
   0  -8 -24   12.90    4.67
   0   8  24   12.74    3.93
   0  -8 -25   71.03    7.01
   0   8  25   74.91    6.58
   0  -8 -25   69.17   14.17
   0  -8 -26   14.76   11.47
   0  -8 -26    4.03    4.62
   0   8  26    5.57    3.93
   0   8  27    1.80    3.88
   0  -8 -27    1.65    4.67
   0  -8 -27   12.79   11.31
   0   8  28    4.46    4.35
   0  -8 -28    6.64    5.04
   0  -8 -28    2.81   10.72
   0  -8 -29   61.26    7.75
   0   8  29   57.92    6.64
   0  -8 -29   77.77   17.09
   0   8  30   -4.14    4.46
   0  -8 -30   -5.68    6.32
   0  -8 -30    4.94   12.00
   0  -9  32   24.26   10.41
   0  -9  31   11.04   10.09
   0  -9  30   23.62   10.30
   0  -9  29   33.98   10.56
   0  -9  29   43.43   10.88
   0  -9  28   16.19    8.60
   0  -9  28   26.33    9.82
   0  -9  27   -5.63    8.18
   0  -9  27   14.97    8.23
   0  -9  26   -0.74    6.95
   0  -9  26    3.08    7.49
   0  -9  25    9.50    8.18
   0  -9  25    1.49    6.95
   0  -9  24   77.08   10.72
   0  -9  24   76.71   15.50
   0  -9  24   87.01   11.20
   0  -9  23  124.01   12.10
   0  -9  23  131.34   12.63
   0  -9  23  126.51   17.57
   0  -9  22  218.40   14.97
   0  -9  22  213.20   14.92
   0  -9  22  202.16   20.33
   0  -9  21   47.78    8.71
   0  -9  21   41.04   12.90
   0  -9  21   32.54    7.59
   0  -9  20   66.52   13.91
   0  -9  20   52.45    8.39
   0  -9  20   50.91    8.65
   0  -9  19   -3.13    5.73
   0  -9  19    9.18    6.00
   0  -9  19   -4.94    8.87
   0  -9  18   -0.48    5.73
   0  -9  18    8.07    8.28
   0  -9  18   -1.38    5.63
   0  -9  17  171.69   12.32
   0  -9  17  170.78   16.40
   0  -9  17  173.28   12.37
   0  -9  16    5.68    5.15
   0  -9  16    5.41    8.49
   0  -9  16   10.14    5.10
   0  -9  15  525.04   19.16
   0  -9  15  484.53   24.47
   0  -9  15  521.96   20.12
   0  -9  14  284.39   14.76
   0  -9  14  309.34   19.80
   0  -9  14  294.21   14.33
   0  -9  13    4.99    4.83
   0  -9  13   -1.59    4.99
   0  -9  13    0.74    7.64
   0  -9  12  726.82   22.40
   0  -9  12  750.87   30.90
   0  -9  12  673.31   20.65
   0  -9  11    1.59    7.27
   0  -9  11    4.99    4.30
   0  -9  11    5.47    4.30
   0  -9  10  854.18   22.08
   0  -9  10  852.64   30.63
   0  -9   9  534.22   17.31
   0   9  -9  518.83   18.05
   0  -9   8   15.24    4.57
   0   9  -8   17.89    4.94
   0  -9   8   12.48    6.80
   0  -9   7  139.99   12.95
   0   9  -7  108.62    8.60
   0  -9   7  113.66    8.12
   0   9  -6  168.29   10.14
   0  -9   6  168.50    9.50
   0   9  -5  225.36   11.04
   0  -9   5  232.42   10.83
   0   9  -4  521.27   15.87
   0  -9   4  553.33   15.77
   0  -9   3   40.56    5.20
   0   9  -3   41.25    5.57
   0  -9   2    9.82    3.82
   0   9  -2   18.10    4.72
   0   9  -1 1181.31   22.24
   0  -9   1 1168.72   21.39
   0  -9   0  244.10    9.87
   0   9   0  240.70   10.19
   0   9   1   61.58    5.68
   0  -9  -1   56.11    5.41
   0  -9  -2   93.01    6.21
   0   9   2   99.59    6.90
   0  -9  -3 1051.67   18.74
   0   9   3 1097.16   20.12
   0  -9  -4   63.39    5.04
   0   9   4   62.32    5.47
   0  -9  -5   68.59    5.20
   0   9   5   73.00    5.95
   0  -9  -6  145.41    7.22
   0   9   6  144.88    7.49
   0   9   7  851.90   16.72
   0  -9  -7  828.49   16.03
   0  -9  -8   38.38    4.03
   0   9   8   42.15    4.62
   0  -9  -9  295.11    9.66
   0   9   9  303.24   10.19
   0   9  10   45.92    4.51
   0  -9 -10   46.40    4.41
   0  -9 -10   47.25    7.27
   0   9  11  550.78   13.43
   0  -9 -11  614.86   21.93
   0  -9 -11  561.35   13.22
   0   9  12  688.49   15.08
   0  -9 -12  681.54   14.71
   0   9  13   29.84    3.98
   0  -9 -13   31.11    4.03
   0  -9 -13   36.10    7.59
   0   9  14  989.39   18.21
   0  -9 -14 1026.82   30.15
   0  -9 -14  974.21   17.89
   0  -9 -15   26.38    6.90
   0   9  15   23.62    4.14
   0  -9 -15   21.29    3.61
   0   9  16   79.74    5.95
   0  -9 -16  100.34   11.36
   0  -9 -16   82.55    6.11
   0  -9 -17  364.92   20.33
   0   9  17  342.31   11.41
   0  -9 -17  364.02   11.79
   0  -9 -18    3.93    3.29
   0  -9 -18    9.40    7.22
   0   9  18    1.11    3.08
   0  -9 -19   13.59    3.82
   0   9  19   16.72    4.14
   0  -9 -19   22.14    8.49
   0   9  20    2.02    3.29
   0  -9 -20    2.55    7.91
   0  -9 -20    6.80    3.72
   0  -9 -21    8.23    8.71
   0  -9 -21    7.43    4.09
   0   9  21    7.43    3.93
   0  -9 -22   12.58    4.57
   0   9  22   17.20    4.46
   0  -9 -22   17.47    8.65
   0  -9 -23   32.22   10.19
   0   9  23   23.46    4.83
   0  -9 -23   22.51    5.26
   0  -9 -24  180.29    9.93
   0   9  24  183.10    9.40
   0  -9 -24  181.61   18.16
   0   9  25  106.65    7.86
   0  -9 -25  104.37    7.96
   0  -9 -25  118.97   16.78
   0  -9 -26  153.79   10.03
   0  -9 -26  166.22   19.43
   0   9  26  161.97    9.24
   0   9  27    3.24    4.09
   0  -9 -27   11.89   11.47
   0  -9 -27    1.33    4.67
   0   9  28   -1.59    4.30
   0  -9 -28    1.17   10.99
   0  -9 -28   -0.42    4.88
   0   9  29    6.80    4.88
   0  -9 -29    5.52    5.36
   0   9  30   25.48    6.37
   0  -9 -30    9.24   13.70
   0 -10  32   30.10   10.56
   0 -10  31   15.93   10.67
   0 -10  30   40.56   11.63
   0 -10  29   -0.90    8.76
   0 -10  28   15.66    8.92
   0 -10  28   -4.88    9.29
   0 -10  27  184.69   15.93
   0 -10  27  163.56   14.81
   0 -10  26  157.25   14.81
   0 -10  26  143.97   14.02
   0 -10  25   -3.34    7.54
   0 -10  25   -6.48    7.27
   0 -10  24   46.24   10.25
   0 -10  24   30.05    8.12
   0 -10  23  106.81   12.00
   0 -10  23  111.70   12.32
   0 -10  23   92.27   16.62
   0 -10  22  203.38   14.92
   0 -10  22  195.04   14.71
   0 -10  22  189.95   20.49
   0 -10  21   15.18    6.95
   0 -10  21    9.82    6.74
   0 -10  21   23.68   11.79
   0 -10  20   42.52    8.33
   0 -10  20   27.50   10.72
   0 -10  20   33.82    8.28
   0 -10  19    0.85    5.89
   0 -10  19   -5.47    7.06
   0 -10  19  -12.53   10.46
   0 -10  18  386.05   18.90
   0 -10  18  419.98   25.85
   0 -10  18  426.98   19.22
   0 -10  17  201.89   13.54
   0 -10  17  230.72   19.64
   0 -10  17  204.92   13.91
   0 -10  16  217.13   17.78
   0 -10  16  207.20   13.38
   0 -10  16  209.64   14.17
   0 -10  15   74.38   11.84
   0 -10  15   86.06    9.29
   0 -10  15   81.17    9.08
   0 -10  14  554.71   21.08
   0 -10  14  549.35   20.12
   0 -10  13    4.88    4.88
   0 -10  13    5.89    8.44
   0 -10  13    3.72    5.41
   0 -10  12   26.86    6.21
   0 -10  12   16.46    4.99
   0 -10  12   20.33    9.72
   0 -10  11    5.84    5.36
   0 -10  11   -0.80    7.75
   0 -10  11   -0.21    4.62
   0 -10  10   12.74    4.78
   0 -10  10   52.88   14.28
   0 -10   9   33.45    9.34
   0  10  -9   27.98    5.79
   0 -10   9   43.00    6.26
   0 -10   8  170.41   14.71
   0  10  -8  187.88   11.89
   0 -10   8  164.62   10.35
   0  10  -7   54.63    6.69
   0 -10   7   54.04    6.58
   0 -10   6   53.09    6.53
   0  10  -6   60.10    7.33
   0 -10   5   12.32    4.35
   0  10  -5   15.02    4.72
   0 -10   4    3.72    3.72
   0  10  -4    4.78    3.77
   0 -10   3  430.86   14.76
   0  10  -3  437.71   15.24
   0  10  -2  125.23    9.02
   0 -10   2  125.39    8.28
   0  10  -1   53.94    6.37
   0 -10   1   58.40    5.79
   0  10   0  184.90    9.82
   0 -10   0  193.29    9.61
   0 -10  -1   -0.53    3.08
   0  10   1    3.77    3.98
   0  10   2  110.90    7.75
   0 -10  -2  103.47    6.95
   0  10   3   13.54    3.77
   0 -10  -3   17.09    3.72
   0  10   4  409.57   13.17
   0 -10  -4  378.36   12.21
   0  10   5  185.54    9.18
   0 -10  -5  176.68    8.55
   0 -10  -6   15.40    3.82
   0  10   6   19.22    4.41
   0  10   7  112.23    7.11
   0 -10  -7  105.91    6.58
   0 -10  -8    5.73    3.03
   0  10   8    7.54    3.19
   0  10   9   81.12    5.95
   0 -10  -9   80.96    5.84
   0  10  10   79.21    6.26
   0 -10 -10   63.60    5.26
   0 -10 -11   71.30    5.57
   0  10  11   79.95    6.32
   0 -10 -11   71.51    9.18
   0 -10 -12   45.76    7.70
   0 -10 -12   45.34    4.78
   0  10  12   44.01    4.94
   0 -10 -13    1.65    2.81
   0  10  13   -0.69    2.81
   0 -10 -14   69.76    5.63
   0 -10 -14   76.34    9.98
   0  10  14   75.60    6.00
   0  10  15   40.19    4.83
   0 -10 -15   44.86    8.44
   0 -10 -15   42.47    4.67
   0  10  16  377.93   12.26
   0 -10 -16  407.87   21.55
   0 -10 -16  373.37   12.16
   0 -10 -17  169.14    8.55
   0 -10 -17  176.73   15.29
   0  10  17  158.68    8.33
   0 -10 -18  366.57   21.29
   0  10  18  373.05   12.42
   0 -10 -18  376.18   12.63
   0 -10 -19   49.96    5.47
   0  10  19   52.03    5.79
   0 -10 -19   59.19   10.72
   0 -10 -20  339.28   12.26
   0  10  20  349.64   12.37
   0 -10 -20  335.35   21.66
   0  10  21   18.21    4.41
   0 -10 -21   20.49    4.83
   0 -10 -21   19.22    9.18
   0  10  22   16.67    4.57
   0 -10 -22   23.20    9.34
   0 -10 -22   19.16    5.04
   0  10  23   52.24    6.00
   0 -10 -23   45.76   12.16
   0 -10 -23   53.19    6.48
   0 -10 -24  123.75    9.02
   0  10  24  124.12    8.44
   0 -10 -24  118.44   15.50
   0 -10 -25  214.95   21.02
   0  10  25  199.56   10.25
   0 -10 -25  176.57   10.41
   0 -10 -26   17.25    5.47
   0  10  26   16.30    4.62
   0 -10 -26   20.39   11.20
   0  10  27    2.34    4.88
   0 -10 -27   -3.93   11.84
   0 -10 -27    4.67    5.26
   0  10  28   63.33    7.17
   0 -10 -28   59.62   15.24
   0 -10 -28   50.38    7.33
   0  10  29  174.23   10.30
   0 -10 -29  174.29   21.82
   0 -10 -29  145.94   10.56
   0 -10 -30   16.93   14.33
   0 -11  31   26.70   10.56
   0 -11  30   -1.91   10.62
   0 -11  29   -3.13    9.98
   0 -11  28    4.67    9.08
   0 -11  27    6.80    8.65
   0 -11  26   16.72    9.40
   0 -11  26   11.94    8.92
   0 -11  25   -5.15    9.45
   0 -11  25    2.39    8.18
   0 -11  24   87.81   12.85
   0 -11  24   66.89   11.52
   0 -11  23   14.92    8.02
   0 -11  23   10.03    7.86
   0 -11  22   -4.25   11.57
   0 -11  22    0.05    7.11
   0 -11  22    7.17    6.90
   0 -11  21    6.26    7.22
   0 -11  21    0.96   10.14
   0 -11  21   13.38    7.59
   0 -11  20  274.57   16.88
   0 -11  20  229.55   20.92
   0 -11  20  246.65   16.99
   0 -11  19   13.32    6.69
   0 -11  19    9.29    7.49
   0 -11  19   19.91   11.47
   0 -11  18    6.48    5.89
   0 -11  18    6.58    6.64
   0 -11  17   11.20    6.48
   0 -11  17    8.55    5.79
   0 -11  17    1.43   10.99
   0 -11  16   16.40    6.74
   0 -11  16   18.85    9.93
   0 -11  16   12.58    6.64
   0 -11  15   90.73   13.96
   0 -11  15  109.84   10.35
   0 -11  15  110.32   10.88
   0 -11  14   51.60   12.69
   0 -11  14   72.84    9.61
   0 -11  14   66.25    8.92
   0 -11  13   60.94    8.39
   0 -11  13   78.41    9.08
   0 -11  12    6.64    5.04
   0 -11  12    3.66    4.94
   0 -11  11   25.22   10.67
   0 -11  11   51.44    7.64
   0 -11  10   11.15    5.26
   0  11 -10    8.49    5.31
   0 -11  10    8.71    9.18
   0  11  -9   -7.91    5.36
   0 -11   9    4.99    7.91
   0 -11   9    0.80    4.51
   0  11  -8  156.24   11.41
   0 -11   8  167.92   10.94
   0  11  -7   73.26    8.39
   0 -11   7   72.04    7.75
   0 -11   7   51.28   11.63
   0 -11   6  166.75   10.51
   0  11  -6  184.32   12.32
   0  11  -5   12.00    5.52
   0 -11   5    8.71    4.35
   0 -11   4   15.45    4.72
   0  11  -4   15.29    4.88
   0 -11   3   22.46    5.04
   0  11  -3   22.24    5.15
   0  11  -2  511.34   17.63
   0 -11   2  549.56   16.88
   0 -11   1  469.67   15.61
   0  11  -1  447.74   16.09
   0  11   0  283.28   12.58
   0 -11   0  284.92   12.21
   0  11   1    5.20    3.93
   0 -11  -1    6.74    3.72
   0  11   2  326.22   13.01
   0 -11  -2  308.55   12.26
   0 -11  -3   20.23    4.78
   0  11   3   19.16    5.10
   0  11   4  641.19   17.94
   0 -11  -4  641.88   16.93
   0  11   5  237.46   11.15
   0 -11  -5  228.17   10.51
   0  11   6   14.28    4.03
   0 -11  -6   17.04    3.61
   0 -11  -7   20.33    4.14
   0  11   7   14.28    3.93
   0 -11  -8   75.70    6.26
   0  11   8   77.35    6.64
   0 -11  -9  276.27   11.04
   0  11   9  288.16   11.63
   0 -11 -10  212.78    9.72
   0  11  10  197.27    9.77
   0  11  11    7.06    3.34
   0 -11 -11    9.72    3.29
   0  11  12   11.36    3.93
   0 -11 -12   10.56    6.05
   0 -11 -12   16.56    3.88
   0  11  13   -0.32    3.19
   0 -11 -13   -0.05    5.68
   0 -11 -13    0.96    3.56
   0 -11 -14  164.09    8.60
   0  11  14  159.63    8.87
   0 -11 -14  154.54   13.64
   0 -11 -15   79.79    6.64
   0  11  15   84.73    6.64
   0 -11 -15   85.36   11.63
   0 -11 -16    6.80    6.95
   0 -11 -16    5.10    3.50
   0  11  16   -1.86    3.34
   0 -11 -17  273.88   11.15
   0  11  17  273.14   11.31
   0 -11 -17  271.86   18.74
   0 -11 -18   55.64   12.00
   0  11  18   54.10    6.00
   0 -11 -18   51.39    5.68
   0 -11 -19    4.62    3.66
   0 -11 -19    0.69    7.59
   0  11  19    2.07    3.88
   0  11  20    2.65    3.72
   0 -11 -20   -1.86    3.72
   0  11  21   15.29    4.35
   0 -11 -21    7.91    8.28
   0 -11 -21    9.98    3.77
   0 -11 -22  284.18   12.37
   0 -11 -22  272.82   21.93
   0  11  22  280.78   11.84
   0 -11 -23   11.94    4.14
   0 -11 -23   24.10   10.83
   0  11  23   16.03    4.83
   0  11  24   24.42    5.73
   0 -11 -24   18.10    5.20
   0 -11 -24   32.81   12.21
   0 -11 -25   70.18    7.59
   0 -11 -25   94.55   16.14
   0  11  25   75.60    7.06
   0  11  26   45.44    6.32
   0 -11 -26   52.72   14.28
   0 -11 -26   30.37    5.95
   0 -11 -27   22.46   13.32
   0  11  27    5.31    4.72
   0 -11 -27    6.95    5.84
   0 -11 -28   -2.28   14.76
   0 -11 -28   10.09    6.26
   0  11  28   16.99    5.84
   0 -11 -29    9.93   13.86
   0  11  29   27.02    6.64
   0 -12  29    2.92    9.77
   0 -12  28   -4.41    9.93
   0 -12  27    6.37    9.50
   0 -12  26   45.97   12.00
   0 -12  25   42.84   10.67
   0 -12  25   44.49   10.94
   0 -12  24   34.24    9.93
   0 -12  24   35.46    9.87
   0 -12  23   11.79    8.28
   0 -12  23   13.43    8.28
   0 -12  22   20.70    7.80
   0 -12  22   37.27    9.29
   0 -12  21  223.23   17.15
   0 -12  21  202.10   21.29
   0 -12  21  211.34   15.98
   0 -12  20    5.31   10.83
   0 -12  20   11.89    7.96
   0 -12  20    8.12    7.70
   0 -12  19    3.72   10.72
   0 -12  19    9.45    7.06
   0 -12  19   10.99    8.02
   0 -12  18   -4.94    6.74
   0 -12  18   -6.26    9.87
   0 -12  18    1.22    6.95
   0 -12  17  141.58   13.01
   0 -12  17  177.95   19.11
   0 -12  17  141.21   14.17
   0 -12  16   34.08    7.75
   0 -12  16   51.39   14.33
   0 -12  16   27.34    7.86
   0 -12  15  309.61   23.94
   0 -12  15  312.10   17.84
   0 -12  15  333.44   17.36
   0 -12  14    8.33    6.16
   0 -12  14   16.62   11.36
   0 -12  14   10.51    5.95
   0 -12  13  413.55   28.03
   0 -12  13  451.35   19.32
   0 -12  13  444.87   20.60
   0 -12  12  271.54   15.87
   0 -12  12  270.32   15.24
   0 -12  11   68.85   14.60
   0 -12  11   23.94    6.95
   0 -12  10  117.43   15.40
   0 -12  10  121.15   10.46
   0  12 -10  107.08   11.36
   0 -12   9   28.51   10.25
   0  12  -9   21.02    6.74
   0 -12   9   37.96    7.06
   0  12  -8   12.58    6.42
   0 -12   8   -2.12    4.57
   0 -12   8   13.22    8.71
   0  12  -7   10.62    5.89
   0 -12   7   13.80    5.41
   0 -12   7   12.16    9.24
   0 -12   6  136.65   10.14
   0  12  -6  147.21   11.15
   0  12  -5   92.21    9.08
   0 -12   5   92.53    8.18
   0 -12   4   54.41    6.69
   0  12  -4   37.64    6.37
   0  12  -3   59.46    7.43
   0 -12   3   61.48    6.80
   0 -12   2   29.04    5.41
   0  12  -2   24.26    5.84
   0 -12   1  565.49   17.78
   0  12  -1  547.01   18.32
   0 -12   0   99.17    7.86
   0  12   0   99.01    8.33
   0  12   1  214.58   11.73
   0 -12  -1  209.38   10.88
   0  12   2   25.54    5.10
   0 -12  -2   27.87    4.88
   0 -12  -3  111.17    7.96
   0  12   3  122.37    8.71
   0  12   4  277.91   12.69
   0 -12  -4  296.02   12.53
   0 -12  -5    5.63    3.34
   0  12   5    8.81    4.35
   0 -12  -6    0.96    3.24
   0  12   6    3.50    3.66
   0  12   7   58.13    6.26
   0 -12  -7   68.43    6.32
   0  12   8    9.13    4.30
   0 -12  -8    4.83    3.61
   0  12   9   88.71    7.38
   0 -12  -9   92.74    7.01
   0 -12 -10   89.82    6.74
   0  12  10   82.18    7.17
   0 -12 -11    9.87    3.72
   0  12  11    8.39    4.09
   0 -12 -12  248.87   16.78
   0  12  12  265.92   11.57
   0 -12 -12  235.02   10.51
   0 -12 -13    8.92    3.88
   0 -12 -13    1.75    6.69
   0  12  13    2.23    3.61
   0  12  14    6.85    3.82
   0 -12 -14    2.02    7.22
   0 -12 -14    6.74    3.72
   0 -12 -15  335.30   12.53
   0  12  15  359.72   13.64
   0 -12 -15  349.58   20.81
   0  12  16  300.48   12.58
   0 -12 -16  284.50   11.94
   0 -12 -16  335.09   21.18
   0 -12 -17  135.80   14.07
   0 -12 -17  130.75    8.28
   0  12  17  138.77    8.92
   0  12  18   13.48    4.83
   0 -12 -18   17.36    4.41
   0 -12 -18   14.55    8.87
   0 -12 -19   61.74    6.42
   0  12  19   64.29    6.74
   0 -12 -19   78.09   12.95
   0 -12 -20  485.11   15.61
   0 -12 -20  462.61   26.33
   0  12  20  458.84   15.18
   0 -12 -21    1.38    9.02
   0  12  21    2.02    4.09
   0 -12 -21    1.22    4.09
   0 -12 -22    7.86    9.56
   0 -12 -22   19.43    5.20
   0  12  22   18.47    5.10
   0 -12 -23   23.78   11.04
   0 -12 -23   22.14    5.04
   0  12  23   33.92    5.79
   0 -12 -24  184.85   19.70
   0 -12 -24  162.82   10.14
   0  12  24  177.47   10.14
   0 -12 -25    8.28    5.47
   0 -12 -25   14.49   10.78
   0  12  25    3.56    4.41
   0  12  26   57.18    6.90
   0 -12 -26   51.71   14.28
   0 -12 -26   49.00    7.11
   0 -12 -27   51.44   15.82
   0 -12 -27   19.59    6.00
   0  12  27   39.13    6.42
   0 -12 -28   37.27   15.08
   0 -12 -28   20.49    6.42
   0  12  28   20.17    5.95
   0 -13  28   -6.32   10.78
   0 -13  27    1.65    9.45
   0 -13  26    5.20    9.34
   0 -13  25    5.79    9.08
   0 -13  24   -3.24    8.76
   0 -13  23    4.99    8.33
   0 -13  23  -24.00   10.46
   0 -13  22   10.94    8.07
   0 -13  22   20.65    9.45
   0 -13  21   11.79    7.80
   0 -13  21    3.45    8.18
   0 -13  20    4.72    7.06
   0 -13  20    3.40    8.23
   0 -13  20   -9.08   12.16
   0 -13  19  109.15   12.85
   0 -13  19  102.46   11.94
   0 -13  18   40.29    8.92
   0 -13  18   24.42    7.70
   0 -13  18   37.96   13.54
   0 -13  17   57.07    9.82
   0 -13  17   50.22    9.61
   0 -13  17   41.78   12.90
   0 -13  16   -1.75    6.42
   0 -13  16   11.84   11.31
   0 -13  16   10.03    7.43
   0 -13  15   19.96    7.70
   0 -13  15   17.04    6.69
   0 -13  14  112.65   16.93
   0 -13  14  150.72   13.17
   0 -13  14  150.98   12.63
   0 -13  13   15.55   12.21
   0 -13  13   30.15    7.54
   0 -13  13   28.14    8.44
   0 -13  12  306.63   23.73
   0 -13  12  289.91   16.93
   0 -13  12  309.61   16.56
   0 -13  11  189.05   18.85
   0 -13  11  195.10   13.01
   0 -13  10   17.68    6.00
   0 -13  10    4.03    9.13
   0  13 -10   19.96    7.06
   0  13  -9   68.91    9.34
   0 -13   9   92.05   13.96
   0 -13   9   93.91    9.50
   0 -13   8   86.43   13.54
   0  13  -8   80.48    9.93
   0 -13   8   85.05    9.13
   0  13  -7  104.79   10.46
   0 -13   7  131.07   16.78
   0 -13   7  119.55   10.35
   0 -13   6   17.47    5.26
   0  13  -6   17.41    6.21
   0  13  -5  292.09   15.08
   0 -13   5  367.15   15.77
   0 -13   4   -3.13    4.46
   0  13  -4   -0.80    4.72
   0  13  -3  327.60   15.40
   0 -13   3  302.07   13.80
   0 -13   2   26.01    5.36
   0  13  -2   32.22    6.37
   0  13  -1  155.97   11.63
   0 -13   1  116.90    9.24
   0  13   0   16.62    4.35
   0 -13   0   14.28    4.14
   0  13   1   22.99    5.57
   0 -13  -1   26.12    5.20
   0  13   2    9.40    4.67
   0 -13  -2   17.25    4.41
   0  13   3   31.69    5.68
   0 -13  -3   24.37    4.88
   0 -13  -4  254.87   11.84
   0  13   4  267.40   12.69
   0  13   5   10.14    4.83
   0 -13  -5   10.35    4.46
   0  13   6   50.27    6.53
   0 -13  -6   48.95    5.95
   0  13   7    2.23    4.35
   0 -13  -7    7.27    3.88
   0  13   8  318.63   13.38
   0 -13  -8  353.83   13.17
   0  13   9   48.63    6.32
   0 -13  -9   60.20    6.26
   0 -13 -10  173.33    9.40
   0  13  10  173.33   10.30
   0  13  11   83.14    7.38
   0 -13 -11   94.71    7.38
   0  13  12   12.26    4.57
   0 -13 -12   13.64    4.30
   0  13  13   29.94    5.57
   0 -13 -13   41.83    9.45
   0 -13 -13   34.35    5.31
   0 -13 -14   83.93    7.06
   0  13  14   78.36    7.22
   0 -13 -15  175.14   15.45
   0  13  15  162.71    9.82
   0 -13 -15  171.42    9.61
   0 -13 -16   50.49    5.89
   0 -13 -16   47.41    9.98
   0  13  16   54.63    6.53
   0  13  17   99.86    8.02
   0 -13 -17  113.08   14.07
   0 -13 -17   93.75    7.64
   0 -13 -18   -2.12    3.98
   0  13  18    1.49    4.19
   0 -13 -18    3.82    9.02
   0 -13 -19   16.78    8.71
   0 -13 -19   10.56    4.41
   0  13  19   12.21    4.78
   0  13  20   45.71    6.58
   0 -13 -20   42.63    6.05
   0 -13 -20   59.78   12.85
   0 -13 -21   10.56   10.14
   0  13  21    6.64    4.41
   0 -13 -21    6.16    4.41
   0  13  22   43.37    6.53
   0 -13 -22   39.87    6.16
   0 -13 -23    5.26    4.88
   0  13  23    8.65    5.10
   0 -13 -23    0.27   10.19
   0 -13 -24    4.83   10.51
   0  13  24    9.08    5.68
   0 -13 -24    6.95    4.94
   0 -13 -25    0.58   10.83
   0  13  25   -1.43    4.94
   0 -13 -25    6.69    5.31
   0  13  26    2.55    5.20
   0 -13 -26   -5.57    5.36
   0 -13 -26    7.27   12.58
   0  13  27    7.49    6.00
   0 -13 -27    3.13    5.52
   0 -13 -27    2.39   12.05
   0 -13 -28   28.93   14.81
   0 -14  26   10.30    9.82
   0 -14  25    2.81    9.40
   0 -14  24   74.06   13.17
   0 -14  23   12.42   10.09
   0 -14  22  -12.21    8.39
   0 -14  21   32.86    9.56
   0 -14  21   26.17   10.25
   0 -14  20   23.41    9.13
   0 -14  20    4.03    7.96
   0 -14  19   -1.96    7.22
   0 -14  19    2.18   11.36
   0 -14  19   -3.34    8.33
   0 -14  18   14.71    7.70
   0 -14  18    9.82   11.57
   0 -14  18   24.37    9.02
   0 -14  17   11.84   12.48
   0 -14  17   30.53    8.81
   0 -14  17   28.03    8.76
   0 -14  16  240.43   17.15
   0 -14  16  250.04   16.35
   0 -14  15   49.96   14.81
   0 -14  15   64.08    9.93
   0 -14  15   39.44    8.97
   0 -14  14    5.79    6.53
   0 -14  14    3.93    7.59
   0 -14  13   12.69    6.64
   0 -14  13    3.88    6.53
   0 -14  12   80.43   10.25
   0 -14  12   73.90   15.82
   0 -14  12   84.67   10.88
   0 -14  11  163.72   18.69
   0 -14  11  168.02   12.63
   0  14 -10   68.06    9.98
   0 -14  10   66.04   13.11
   0 -14  10   56.91    8.33
   0  14  -9    6.37    7.01
   0 -14   9   -4.78    9.77
   0 -14   9   13.22    6.48
   0 -14   8  280.89   15.34
   0  14  -8  284.92   16.93
   0 -14   7   21.61    6.42
   0  14  -7   18.37    7.43
   0 -14   6   40.51    6.90
   0  14  -6   44.59    8.44
   0 -14   5   -1.43    4.57
   0  14  -5    2.18    5.47
   0  14  -4  460.43   19.06
   0 -14   4  486.44   18.16
   0 -14   3   12.95    5.15
   0  14  -3   11.41    5.68
   0  14  -2   31.32    6.80
   0 -14   2   24.00    5.52
   0 -14   1   51.76    7.01
   0  14  -1   55.05    8.12
   0 -14   0   71.88    7.59
   0  14   0   80.48    8.71
   0  14   1   20.12    5.73
   0 -14  -1   18.00    4.88
   0 -14  -2    4.78    4.35
   0  14   2    0.05    4.78
   0  14   3   88.39    8.71
   0 -14  -3   75.23    7.49
   0 -14  -4    3.45    3.98
   0  14   4    8.71    5.41
   0  14   5  177.10   11.25
   0 -14  -5  178.27   10.19
   0 -14  -6   -2.97    3.72
   0  14   6    1.86    4.72
   0 -14  -7  181.83   10.41
   0  14   7  189.15   11.47
   0  14   8   -0.53    4.51
   0 -14  -8   -1.96    4.03
   0 -14  -9   43.00    6.16
   0  14   9   30.90    5.79
   0 -14 -10    9.56    3.88
   0  14  10    7.96    4.88
   0  14  11  428.95   15.93
   0 -14 -11  421.94   14.92
   0  14  12   11.68    5.15
   0 -14 -12    8.12    4.19
   0 -14 -13    9.08    7.75
   0  14  13    3.88    5.15
   0 -14 -13    0.05    3.93
   0 -14 -14  167.60   15.71
   0 -14 -14  137.44    9.13
   0  14  14  138.77    9.98
   0 -14 -15   70.61    7.11
   0 -14 -15   65.62   10.88
   0  14  15   78.73    7.75
   0  14  16    7.22    4.62
   0 -14 -16    1.59    8.18
   0 -14 -16    0.69    4.19
   0 -14 -17   -6.85    7.86
   0 -14 -17   -0.32    3.98
   0  14  17    8.12    4.72
   0  14  18   79.79    8.12
   0 -14 -18   90.73   13.91
   0 -14 -18   85.10    7.49
   0 -14 -19  435.58   25.85
   0  14  19  417.43   16.09
   0 -14 -19  408.24   15.34
   0 -14 -20   59.88   12.74
   0  14  20   45.60    6.64
   0 -14 -20   45.39    6.48
   0 -14 -21   51.02    6.80
   0 -14 -21   53.72   13.54
   0  14  21   48.52    6.58
   0 -14 -22    2.81    4.88
   0 -14 -22    4.62   10.30
   0  14  22    0.48    4.88
   0  14  23   -1.01    4.99
   0 -14 -23    1.01    4.83
   0 -14 -23    7.70   10.30
   0 -14 -24  -10.88   12.05
   0 -14 -24    3.61    4.83
   0  14  24   19.96    6.21
   0  14  25   -2.12    5.73
   0 -14 -25    3.93    5.10
   0 -14 -26   12.16   13.17
   0 -14 -26   11.57    5.95
   0  14  26   13.01    5.89
   0 -14 -27   20.28    6.64
   0  14  27   21.71    6.26
   0 -14 -27   27.76   13.96
   0 -15  25   22.19   11.57
   0 -15  24   -0.48    9.61
   0 -15  23   13.64   10.62
   0 -15  22   20.76   10.14
   0 -15  21   21.98    9.13
   0 -15  20  -11.94    8.07
   0 -15  19   70.45   11.73
   0 -15  19   46.24   11.31
   0 -15  18  148.01   14.49
   0 -15  18  129.59   18.85
   0 -15  18  135.05   15.50
   0 -15  17   41.94   14.60
   0 -15  17   56.64   10.19
   0 -15  17   55.64   11.73
   0 -15  16   39.02   15.66
   0 -15  16   38.22    9.08
   0 -15  16   19.16    8.55
   0 -15  15   31.59   14.44
   0 -15  15   22.99    8.28
   0 -15  15   23.31    8.12
   0 -15  14   -4.67    7.38
   0 -15  14    0.90    6.48
   0 -15  14   17.04   12.32
   0 -15  13  134.84   20.65
   0 -15  13  133.30   13.48
   0 -15  13  112.39   11.79
   0 -15  12   13.32    7.17
   0 -15  12   19.48    8.92
   0 -15  11  131.29   20.54
   0 -15  11   42.68    8.55
   0 -15  10   36.31    8.12
   0  15 -10   21.45    7.91
   0 -15  10    9.08   11.52
   0 -15   9   29.41   12.85
   0  15  -9   16.51    7.70
   0 -15   9   37.59    7.59
   0 -15   8  340.61   17.63
   0 -15   8  391.26   27.61
   0  15  -8  330.90   19.06
   0  15  -7   35.57    8.76
   0 -15   7   51.07    8.28
   0 -15   6   26.17    6.58
   0  15  -6   14.39    6.74
   0 -15   5    2.65    4.94
   0  15  -5   -8.39    6.95
   0  15  -4   26.17    7.43
   0 -15   4   24.21    5.79
   0 -15   3  101.56    9.56
   0  15  -3  117.22   10.83
   0 -15   2   24.53    6.00
   0  15  -2   15.08    6.00
   0 -15   1   84.99    8.65
   0  15  -1   78.73    9.24
   0  15   0    9.50    5.63
   0 -15   0   14.44    5.26
   0 -15  -1   74.16    8.23
   0  15   1   59.14    7.91
   0  15   2   55.32    7.91
   0 -15  -2   57.97    7.43
   0  15   3   11.68    5.89
   0 -15  -3   13.54    4.83
   0  15   4   29.89    6.26
   0 -15  -4   35.36    6.21
   0  15   5    4.19    4.99
   0 -15  -5   -1.75    4.14
   0 -15  -6  146.10   10.19
   0  15   6  145.14   10.62
   0 -15  -7   12.58    4.62
   0  15   7   21.18    6.21
   0  15   8    6.90    4.67
   0 -15  -8    7.54    4.46
   0  15   9   28.99    6.53
   0 -15  -9   31.85    5.79
   0  15  10   15.45    5.95
   0 -15 -10   22.62    5.63
   0 -15 -11  406.39   15.50
   0  15  11  419.13   16.99
   0 -15 -12    8.23    4.51
   0  15  12   17.57    5.68
   0 -15 -13   56.54    6.74
   0 -15 -13   49.53   10.83
   0  15  13   55.69    7.49
   0  15  14  106.81    9.45
   0 -15 -14   94.28   13.86
   0 -15 -14   90.41    8.23
   0  15  15   48.26    7.70
   0 -15 -15   38.54   10.56
   0 -15 -15   34.77    5.89
   0 -15 -16   88.76    8.02
   0 -15 -16   73.69   12.63
   0  15  16   89.19    8.81
   0  15  17   21.08    5.63
   0 -15 -17   12.58   10.09
   0 -15 -17   19.16    5.31
   0 -15 -18   22.14    5.68
   0  15  18   25.91    6.16
   0 -15 -18   24.21   10.56
   0  15  19    5.31    5.63
   0 -15 -19   -0.69    4.62
   0 -15 -19    2.34    9.56
   0 -15 -20   -5.52    4.99
   0  15  20    7.70    5.89
   0 -15 -20    3.93    9.87
   0 -15 -21   57.55    7.33
   0  15  21   52.03    7.49
   0  15  22   15.34    6.53
   0 -15 -22    9.66    9.93
   0 -15 -22    8.76    5.26
   0 -15 -23    9.93    5.31
   0 -15 -23   17.89   12.16
   0  15  23    8.44    5.89
   0 -15 -24   98.74    9.29
   0 -15 -24   79.15   15.87
   0  15  24   95.72    9.93
   0  15  25  -10.56    6.48
   0 -15 -25    7.38   12.79
   0 -15 -25   -2.60    5.57
   0 -15 -26   -9.18    6.11
   0  15  26    7.27    6.37
   0 -15 -26   16.09   13.11
   0 -16  23    1.27    9.98
   0 -16  22   59.94   13.54
   0 -16  21   10.30    9.45
   0 -16  20   15.87   10.35
   0 -16  19    4.67    8.55
   0 -16  18   15.29    9.45
   0 -16  17   21.08    8.71
   0 -16  17   22.24    8.87
   0 -16  16   23.84   16.46
   0 -16  16   -1.43    8.18
   0 -16  16   44.86   12.32
   0 -16  15   33.13   16.09
   0 -16  15   13.11    8.23
   0 -16  15   32.54    9.13
   0 -16  14   94.55   12.00
   0 -16  14  102.88   13.75
   0 -16  14   96.30   19.48
   0 -16  13   90.14   18.42
   0 -16  13   99.59   12.58
   0 -16  13  100.76   11.89
   0 -16  12  173.76   15.87
   0 -16  12  155.12   20.33
   0 -16  12  172.53   14.39
   0 -16  11    4.83    6.48
   0 -16  11   27.07   15.34
   0  16 -10   18.69    9.82
   0 -16  10    2.28    6.00
   0  16  -9  138.72   14.33
   0 -16   9  161.28   20.54
   0 -16   9  161.86   13.11
   0 -16   8    8.07    6.26
   0  16  -8   17.31    8.23
   0  16  -7   11.89    7.17
   0 -16   7   22.56    6.74
   0 -16   6  154.27   12.63
   0  16  -6  153.05   14.17
   0 -16   5  366.84   17.94
   0  16  -5  328.61   19.16
   0 -16   4   42.63    8.33
   0  16  -4   36.84    8.49
   0  16  -3   91.47   10.88
   0 -16   3  111.70   10.30
   0  16  -2  305.52   17.09
   0 -16   2  326.06   16.19
   0  16  -1   90.41   10.51
   0 -16   1   79.47    8.87
   0  16   0    2.23    5.95
   0 -16   0   -0.16    4.72
   0 -16  -1    8.28    5.26
   0  16   1    6.11    6.48
   0 -16  -2  147.64   11.20
   0  16   2  150.18   12.00
   0  16   3   25.59    6.90
   0 -16  -3   22.24    6.11
   0  16   4   -1.43    5.63
   0 -16  -4   -0.96    4.83
   0  16   5  221.48   13.86
   0 -16  -5  230.67   13.27
   0  16   6   41.89    8.18
   0 -16  -6   34.29    6.90
   0  16   7   38.33    7.59
   0 -16  -7   29.30    6.32
   0 -16  -8   41.46    6.48
   0  16   8   49.58    7.96
   0 -16  -9  393.59   16.30
   0  16   9  425.28   17.84
   0  16  10    8.92    6.00
   0 -16 -10    8.18    4.57
   0  16  11   12.37    5.41
   0 -16 -11   30.15    5.84
   0 -16 -12    0.69    4.25
   0  16  12    4.25    5.47
   0 -16 -13  216.54   12.00
   0  16  13  225.62   13.54
   0 -16 -14    8.60    8.23
   0 -16 -14   20.17    5.57
   0  16  14    7.59    5.36
   0 -16 -15   32.70   10.78
   0  16  15   31.37    6.85
   0 -16 -15   31.59    6.21
   0 -16 -16   11.73    5.04
   0  16  16    9.98    6.26
   0 -16 -16   18.32   11.04
   0 -16 -17    5.10    8.87
   0  16  17   -1.86    5.47
   0 -16 -17    3.93    4.67
   0  16  18  168.29   11.94
   0 -16 -18  183.95   11.52
   0 -16 -18  162.24   18.95
   0 -16 -19   -1.96    9.56
   0  16  19    1.33    6.05
   0 -16 -19   -4.03    4.83
   0 -16 -20   43.11   12.42
   0  16  20   32.76    7.59
   0 -16 -20   25.00    6.05
   0 -16 -21   28.83   12.16
   0 -16 -21   14.02    5.57
   0  16  21   21.61    7.17
   0  16  22   31.11    7.64
   0 -16 -22   19.01   13.01
   0 -16 -22   27.55    6.37
   0  16  23   -0.32    6.00
   0 -16 -23    5.79    5.41
   0  16  24   42.68    8.39
   0 -16 -24   64.77   16.56
   0 -16 -24   38.22    7.17
   0 -16 -25   34.19   14.97
   0  16  25   22.93    7.64
   0 -16 -25   12.69    6.48
   0 -17  21   -0.58    9.87
   0 -17  20   25.00   10.78
   0 -17  19   -2.28    9.13
   0 -17  18  -15.45    9.13
   0 -17  17    2.12    8.07
   0 -17  16   41.89   10.78
   0 -17  15    1.49    9.18
   0 -17  15   -0.16    7.27
   0 -17  15   22.46   17.31
   0 -17  14   -4.62    7.75
   0 -17  14    6.85    8.65
   0 -17  14   10.67   14.71
   0 -17  13   10.41   14.28
   0 -17  13    5.15    7.96
   0 -17  13   18.74    8.28
   0 -17  12   47.89   10.03
   0 -17  12   76.34   11.31
   0 -17  12   98.16   19.38
   0 -17  11   91.15   17.57
   0 -17  11  118.12   12.37
   0 -17  10   53.09   14.33
   0 -17  10   74.85   10.25
   0  17 -10   60.41   11.31
   0 -17   9   97.89   17.78
   0 -17   9  131.98   12.42
   0  17  -9  116.31   13.38
   0 -17   8   36.84   16.30
   0  17  -8   11.63    8.76
   0 -17   8   18.47    7.27
   0 -17   7   -1.43    5.79
   0  17  -7   10.99    7.86
   0 -17   6   36.26    8.44
   0  17  -6   17.20    8.18
   0 -17   5   21.55    7.49
   0  17  -5    9.29    7.17
   0  17  -4   26.81    8.07
   0 -17   4   40.61    8.33
   0  17  -3   95.56   11.68
   0 -17   3   95.56   10.51
   0 -17   2   31.11    7.43
   0  17  -2   26.38    8.02
   0 -17   1   13.27    6.16
   0  17  -1   20.44    7.70
   0 -17   0    7.49    5.26
   0  17   0   16.88    7.54
   0  17   1  643.63   24.47
   0 -17  -1  608.12   21.71
   0 -17  -2   24.47    6.69
   0  17   2   13.32    7.06
   0  17   3  260.77   15.71
   0 -17  -3  272.18   14.86
   0  17   4    4.94    6.00
   0 -17  -4    1.17    4.83
   0 -17  -5   97.04    9.29
   0  17   5   90.83   10.14
   0  17   6    2.71    6.32
   0 -17  -6    2.65    4.62
   0  17   7   26.81    7.64
   0 -17  -7   14.60    5.36
   0  17   8   -8.28    6.00
   0 -17  -8    8.18    5.20
   0 -17  -9   15.66    5.57
   0  17   9   21.93    6.69
   0  17  10   -2.28    5.52
   0 -17 -10    2.34    4.94
   0 -17 -11   18.10    5.84
   0  17  11   13.59    6.80
   0  17  12    8.49    6.32
   0 -17 -12   -7.91    4.72
   0 -17 -13   42.20    6.80
   0  17  13   49.21    7.75
   0 -17 -14   30.15    6.74
   0  17  14   14.71    6.42
   0 -17 -14   31.11   10.56
   0  17  15   53.09    8.23
   0 -17 -15   76.71   13.59
   0 -17 -15   59.62    7.86
   0  17  16    3.45    5.79
   0 -17 -16    2.39    4.78
   0  17  17   49.21    8.44
   0 -17 -17   37.59   11.73
   0 -17 -17   39.28    6.48
   0 -17 -18    0.16    4.94
   0  17  18   -1.91    6.00
   0 -17 -18  -12.79   11.20
   0 -17 -19    1.80   10.19
   0 -17 -19    3.03    5.04
   0  17  19   -2.81    6.05
   0 -17 -20   29.20   12.63
   0 -17 -20   24.26    6.37
   0  17  20   32.91    7.70
   0 -17 -21   10.35    5.79
   0  17  21    7.91    6.80
   0 -17 -21   13.27   13.06
   0  17  22    7.43    6.74
   0 -17 -22    6.48    5.63
   0 -17 -22    7.49   12.42
   0  17  23   17.94    7.43
   0 -17 -23   12.48   13.01
   0 -17 -23    8.97    6.05
   0 -17 -24   41.46    7.96
   0  17  24   38.54    8.33
   0 -17 -24   56.43   16.30
   0 -18  19   61.85   12.85
   0 -18  18   -1.01    8.87
   0 -18  17   50.06   10.88
   0 -18  16  201.73   16.88
   0 -18  15  120.14   13.80
   0 -18  14   11.94    8.39
   0 -18  13   16.35   15.71
   0 -18  13    5.68    7.96
   0 -18  12   -6.48   14.12
   0 -18  12   11.57    9.66
   0 -18  12    2.60    7.11
   0 -18  11   81.22   19.22
   0 -18  11  100.81   12.37
   0 -18  10  168.92   14.65
   0 -18  10  133.25   19.59
   0  18  -9   37.00   10.25
   0 -18   9   59.67   17.20
   0 -18   9   62.91   10.30
   0  18  -8  121.52   15.02
   0 -18   8  141.85   21.29
   0 -18   8  112.49   12.10
   0 -18   7   15.98    7.17
   0  18  -7   16.19    8.76
   0 -18   7   19.27   14.65
   0  18  -6    8.87    8.87
   0 -18   6    7.17    6.53
   0 -18   5  133.25   12.05
   0  18  -5  149.71   14.65
   0  18  -4    7.38    7.59
   0 -18   4    3.61    5.57
   0 -18   3  117.70   11.31
   0  18  -3  125.23   13.22
   0 -18   2   20.23    7.01
   0  18  -2   16.56    8.02
   0 -18   1   -0.32    5.41
   0  18  -1    5.52    7.17
   0 -18   0   16.72    6.11
   0  18   0    4.62    7.01
   0 -18  -1   30.63    7.27
   0  18   1   31.96    8.28
   0 -18  -2    6.16    5.73
   0  18   2    3.66    6.48
   0  18   3    2.44    6.58
   0 -18  -3    5.31    5.20
   0 -18  -4    2.81    5.31
   0  18   4   -4.30    6.21
   0  18   5    4.09    6.48
   0 -18  -5   -0.69    5.31
   0  18   6   13.91    6.69
   0 -18  -6    8.44    5.41
   0 -18  -7   22.46    6.26
   0  18   7   30.31    7.38
   0  18   8    2.12    6.00
   0 -18  -8    5.47    5.04
   0 -18  -9   59.41    8.12
   0  18   9   59.35    9.34
   0  18  10   17.78    7.27
   0 -18 -10   13.17    5.63
   0 -18 -11   20.54    6.32
   0  18  11   24.00    6.95
   0  18  12   93.33   10.25
   0 -18 -12  104.10    9.72
   0  18  13   54.20    8.87
   0 -18 -13   51.81    7.49
   0 -18 -14   97.31    9.40
   0  18  14   94.81   10.41
   0 -18 -14  110.00   15.87
   0 -18 -15   29.15   10.78
   0  18  15   39.60    8.60
   0 -18 -15   43.11    7.59
   0 -18 -16   11.31    5.95
   0 -18 -16   -7.49   10.78
   0  18  16    3.72    6.48
   0 -18 -17    5.52   10.46
   0 -18 -17    8.33    5.36
   0  18  17   12.69    7.27
   0  18  18   13.80    7.38
   0 -18 -18   12.32    5.73
   0 -18 -18   29.30   12.58
   0 -18 -19   75.76    8.87
   0  18  19   72.31    9.82
   0 -18 -19   94.66   17.31
   0 -18 -20  156.71   19.75
   0  18  20  147.64   12.53
   0 -18 -20  116.58   10.25
   0 -18 -21   47.19   16.19
   0  18  21   76.66   10.09
   0 -18 -21   58.50    8.81
   0 -18 -22   20.01   14.33
   0 -18 -22  -10.56    6.37
   0  18  22    9.45    7.38
   0 -18 -23   26.81    7.49
   0  18  23   19.11    7.49
   0 -18 -24   41.78    8.71
   0 -19  17   17.20    9.93
   0 -19  16   15.18    9.02
   0 -19  15   42.26   11.10
   0 -19  14   10.62    8.87
   0 -19  13    1.06    8.39
   0 -19  12   -5.47    7.86
   0 -19  11   11.47    8.49
   0 -19  10   19.59   14.33
   0 -19  10   44.65   10.14
   0  19  -9  128.37   15.24
   0 -19   9  147.16   14.33
   0 -19   9  129.85   20.65
   0 -19   8   38.75   16.67
   0  19  -8   54.10   12.10
   0 -19   8   62.22   10.83
   0 -19   7   91.74   20.01
   0 -19   7   97.10   11.73
   0  19  -7   65.19   12.37
   0 -19   6   12.16    7.33
   0  19  -6   12.79    8.87
   0  19  -5   19.43    9.87
   0 -19   5   18.05    7.43
   0 -19   4    7.22    6.26
   0  19  -4   -6.16    7.86
   0  19  -3   76.13   11.79
   0 -19   3   87.28   10.83
   0 -19   2   96.14   10.83
   0  19  -2   96.67   12.58
   0  19  -1   33.45    8.97
   0 -19   1   54.20    8.71
   0  19   0    3.66    7.64
   0 -19   0   -4.94    6.37
   0 -19  -1   70.82    9.45
   0  19   1   70.98   10.51
   0 -19  -2   -2.39    5.73
   0  19   2    7.33    7.75
   0  19   3   21.66    8.44
   0 -19  -3   34.83    7.54
   0  19   4   13.80    7.75
   0 -19  -4    2.55    5.57
   0  19   5    1.65    7.17
   0 -19  -5   -2.02    5.41
   0 -19  -6   60.36    8.60
   0  19   6   67.00   10.03
   0  19   7   30.21    8.60
   0 -19  -7   37.00    7.54
   0  19   8   11.47    7.38
   0 -19  -8   19.80    6.37
   0 -19  -9    3.66    5.20
   0  19   9    3.19    7.01
   0 -19 -10   13.22    5.89
   0  19  10   16.62    7.27
   0  19  11   82.13   10.62
   0 -19 -11   80.00    9.08
   0  19  12   -2.12    6.58
   0 -19 -12    7.06    5.57
   0 -19 -13  102.88   10.14
   0  19  13  102.19   11.41
   0  19  14   15.45    7.96
   0 -19 -14    0.69    5.20
   0 -19 -14  -10.19   11.04
   0  19  15   -9.24    6.69
   0 -19 -15    5.36    5.47
   0 -19 -15   -1.86   11.47
   0 -19 -16   -7.91   11.57
   0  19  16   -0.21    6.64
   0 -19 -16   -1.59    5.73
   0  19  17  -10.99    7.59
   0 -19 -17    7.70    5.95
   0 -19 -17   -2.76   10.72
   0 -19 -18  -15.34   11.84
   0 -19 -18    2.02    5.47
   0  19  18   -0.69    7.17
   0  19  19   16.19    8.02
   0 -19 -19    0.48    5.95
   0 -19 -19    4.67   12.85
   0 -19 -20   10.88    6.16
   0 -19 -20   16.62   13.59
   0  19  20   12.16    8.33
   0 -19 -21   49.90   15.45
   0  19  21   37.37    9.45
   0 -19 -21   29.20    7.80
   0 -19 -22    4.35    6.69
   0  19  22   16.93    8.39
   0 -19 -23   55.10    9.13
   0 -20  14   -7.43    9.66
   0 -20  13   21.29    9.02
   0 -20  12   22.56   10.35
   0 -20  11  -12.10   10.30
   0 -20  10   58.98   11.79
   0 -20   9   29.62    8.81
   0 -20   8   21.39    8.65
   0 -20   7   65.67   19.64
   0 -20   7   24.85    8.23
   0 -20   6   10.35    7.06
   0  20  -5   18.69   10.30
   0 -20   5    5.95    6.58
   0 -20   4   10.25    7.22
   0  20  -4   -9.77    9.45
   0 -20   3   19.22    7.38
   0  20  -3   27.23   10.14
   0  20  -2   33.76   10.56
   0 -20   2   22.19    7.54
   0 -20   1    5.31    6.95
   0  20  -1   -1.65    8.12
   0  20   0   -6.90    8.39
   0 -20   0   -6.69    6.48
   0  20   1   -3.93    8.23
   0 -20  -1    3.77    6.21
   0  20   2    0.11    7.43
   0 -20  -2   15.98    7.22
   0  20   3   22.99    8.92
   0 -20  -3   14.71    6.37
   0  20   4    1.17    7.27
   0 -20  -4    8.71    6.42
   0  20   5   -2.07    7.75
   0 -20  -5   -3.29    6.21
   0 -20  -6   30.74    7.96
   0  20   6   39.02    9.56
   0  20   7   -1.17    7.54
   0 -20  -7   -0.96    5.89
   0  20   8   -0.27    7.70
   0 -20  -8    3.77    5.79
   0  20   9    3.19    7.64
   0 -20  -9   11.52    6.85
   0 -20 -10   -6.74    6.80
   0  20  10    3.93    7.22
   0  20  11   26.70    8.76
   0 -20 -11   24.63    7.64
   0  20  12   11.04    8.12
   0 -20 -12    3.40    5.73
   0  20  13    7.33    7.43
   0 -20 -13    1.43    5.84
   0 -20 -14   29.25    7.38
   0  20  14   17.09    7.96
   0 -20 -15   40.88    8.39
   0  20  15   35.83    9.02
   0  20  16   18.85    8.87
   0 -20 -16    4.35    6.11
   0 -20 -16   20.12   12.16
   0  20  17    0.64    7.96
   0 -20 -17    8.23    6.90
   0 -20 -17   20.44   13.75
   0 -20 -18    8.39    7.06
   0  20  18    5.20    7.54
   0 -20 -18   15.82   13.17
   0 -20 -19   43.32   15.34
   0  20  19   50.65   10.78
   0 -20 -19   55.74    9.18
   0 -20 -20   42.05    8.81
   0  20  20   55.48   10.88
   0 -20 -21   24.15    8.07
   0  20  21   19.32    9.40
   0 -20 -22   34.67    8.49
   0 -21  11   -2.81    9.87
   0 -21  10   64.50   12.74
   0 -21   9    0.37    8.39
   0 -21   8   38.49   10.35
   0 -21   7   60.31   10.83
   0 -21   6  102.72   12.74
   0 -21   5   17.89    8.18
   0 -21   4   10.09    7.33
   0 -21   3   -1.86    7.06
   0 -21   2   59.51    9.77
   0  21  -1   68.38   13.96
   0 -21   1    9.98    7.33
   0 -21   0   19.01    8.12
   0  21   0   10.83    8.76
   0 -21  -1   -3.40    6.90
   0  21   1  -28.83   10.72
   0 -21  -2   65.93    9.56
   0  21   2   63.39   11.63
   0  21   3   50.38   10.67
   0 -21  -3   47.19    8.71
   0 -21  -4    8.71    6.42
   0  21   4   16.30    9.24
   0  21   5    6.21    8.55
   0 -21  -5   10.62    7.17
   0 -21  -6   19.96    7.59
   0  21   6   18.58    8.97
   0 -21  -7   32.76    7.75
   0  21   7   28.45    9.61
   0  21   8    4.35    8.71
   0 -21  -8   -2.92    7.17
   0 -21  -9   22.24    7.54
   0  21   9   24.53    9.24
   0  21  10   36.52    9.77
   0 -21 -10   48.36    9.02
   0  21  11   10.72    9.02
   0 -21 -11   13.96    6.90
   0 -21 -12   13.70    7.22
   0  21  12   13.38    8.60
   0 -21 -13  102.62   11.20
   0  21  13   85.58   11.94
   0  21  14   20.12    9.02
   0 -21 -14   23.73    7.27
   0 -21 -15  121.94   19.11
   0  21  15   91.36   12.48
   0 -21 -15  102.25   11.25
   0  21  16   36.42    9.82
   0 -21 -16   26.92    8.33
   0 -21 -16   34.08   14.12
   0 -21 -17   59.41   16.24
   0 -21 -17   44.22    8.81
   0  21  17   39.50    9.93
   0 -21 -18    3.61    6.53
   0  21  18    0.64    8.49
   0 -21 -19   15.71    7.80
   0  21  19    4.67    8.71
   0 -21 -20    3.72    6.95
   0  21  20   -0.74    8.18
   0 -21 -21  -10.03    8.02
   0 -22   8   -3.72    8.65
   0 -22   7   22.35    9.02
   0 -22   6  -10.67    8.33
   0 -22   5    4.19    8.28
   0 -22   4  -10.46    9.29
   0 -22   3   10.99    7.96
   0 -22   2    3.72    7.59
   0 -22   1   17.94    8.33
   0 -22   0   74.85   11.15
   0 -22  -1   46.19    9.40
   0 -22  -2   10.99    7.43
   0 -22  -3   -6.21    6.95
   0 -22  -4   26.49    8.33
   0 -22  -5   31.53    8.55
   0 -22  -6   34.29    8.71
   0 -22  -7    3.45    7.22
   0 -22  -8   14.39    7.33
   0 -22  -9   21.39    8.55
   0  22   9   60.84   13.59
   0  22  10   22.14   10.62
   0 -22 -10   -2.65    7.17
   0  22  11   20.65   10.56
   0 -22 -11   15.71    7.64
   0 -22 -12   16.40    8.12
   0  22  12   27.71   11.15
   0  22  13   24.47   10.56
   0 -22 -13    1.86    7.01
   0  22  14   75.33   13.91
   0 -22 -14   41.09    8.60
   0 -22 -15   14.39    7.06
   0  22  15   57.55   12.16
   0 -22 -16   -3.50    7.75
   0 -22 -17   -1.80    7.43
   0 -22 -18    9.82    7.22
   0 -22 -19   -1.59    7.96
   0 -22 -20    4.19    7.96
   0 -23   3   22.03    9.40
   0 -23   2    7.22    8.49
   0 -23   1   13.38    9.45
   0 -23   0   16.72    9.08
   0 -23  -1   19.38    8.97
   0 -23  -2   29.73    8.71
   0 -23  -3   32.91    9.02
   0 -23  -4   30.26    8.23
   0 -23  -5   21.66    8.92
   0 -23  -6   56.54   10.41
   0 -23  -7    7.91    7.22
   0 -23  -8    6.53    8.39
   0 -23  -9   15.77    8.33
   0 -23 -10    6.42    7.64
   0 -23 -11    4.41    7.33
   0 -23 -12   -1.65    7.75
   0 -23 -13   16.14    8.23
   0 -23 -14   25.48    8.18
   0 -23 -15    1.22    7.43
   0 -23 -16   14.49    9.02
   0 -23 -17    5.36    8.12
   0 -23 -18   14.60    8.44
   0 -24  -3   14.28    9.34
   0 -24  -4    7.75    9.02
   0 -24  -5   -0.74    8.44
   0 -24  -6    5.57    8.55
   0 -24  -7   42.63   10.35
   0 -24  -8   33.18   10.78
   0 -24  -9   -4.46    8.65
   0 -24 -10   13.86    8.65
   0 -24 -11    9.34    8.44
   0 -24 -12   -2.50    7.80
   0 -24 -13   -1.27    7.86
   0 -24 -14   -0.21    8.28
   0 -24 -15   13.80    8.87
   0 -24 -16    4.83    8.28
   1 -24 -16   12.32    8.87
   1 -24 -15   46.66   10.09
   1 -24 -14   44.43    9.93
   1 -24 -13    5.04    8.55
   1 -24 -12    8.28    7.86
   1 -24 -11   15.71    8.65
   1 -24 -10   -7.11    8.60
   1 -24  -9   -0.05    8.65
   1 -24  -8   12.48    8.87
   1 -24  -7  -15.50    9.13
   1 -24  -6    3.56    8.60
   1 -24  -5    2.60    8.18
   1 -24  -4   25.75    9.93
   1 -24  -3   -6.58    7.96
   1 -24  -2   66.57   12.16
   1 -23 -17    6.69    7.54
   1 -23 -16   -2.18    7.96
   1 -23 -15    9.93    7.54
   1 -23 -14   16.19    8.60
   1 -23 -13    4.57    7.49
   1 -23 -12   60.15   10.67
   1 -23 -11    4.99    7.43
   1 -23 -10   52.24   10.56
   1 -23  -9   -8.33    8.02
   1 -23  -8   27.23    9.29
   1 -23  -7   32.38    9.24
   1 -23  -6   -6.58    7.49
   1 -23  -5   62.06   11.15
   1 -23  -4   82.23   12.42
   1 -23  -3   16.35    9.02
   1 -23  -2   67.42   11.36
   1 -23  -1    6.64    8.18
   1 -23   0    8.76    9.02
   1 -23   1   12.42    8.28
   1 -23   2   73.79   11.79
   1 -23   3    6.53    8.12
   1 -23   4   51.49   11.57
   1 -22 -18   13.06    7.86
   1 -22 -17   21.98    8.07
  -1  22  17   12.53    9.13
   1 -22 -16    4.03    7.27
  -1  22  16    9.72   10.03
  -1  22  15   14.07    9.34
   1 -22 -15    9.45    6.74
   1 -22 -14    5.15    7.11
  -1  22  14    8.28    8.76
   1 -22 -13   25.06    8.23
  -1  22  13   25.32    9.87
  -1  22  12   44.33   11.25
   1 -22 -12   50.27    9.13
   1 -22 -11   27.82    7.86
  -1  22  11   29.15   10.30
  -1  22  10   -5.52    9.24
   1 -22 -10    5.04    6.80
  -1  22   9    4.72    9.02
   1 -22  -9   -6.11    7.22
  -1  22   8   30.90   11.10
   1 -22  -8   -0.80    6.85
  -1  22   7    0.53    8.92
   1 -22  -7   -8.18    7.06
  -1  22   6   39.23   12.21
   1 -22  -6   23.31    7.64
   1 -22  -5   -0.58    6.53
  -1  22   5   77.08   15.08
   1 -22  -4   94.28   12.00
   1 -22  -3   13.01    7.80
   1 -22  -2    0.80    6.95
   1 -22  -1    5.79    7.59
   1 -22   0    0.11    7.54
   1 -22   1   25.75    8.71
   1 -22   2   36.31   10.03
   1 -22   3    8.81    8.02
   1 -22   4   35.67    9.82
   1 -22   5    8.02    8.28
   1 -22   6   16.56    8.92
   1 -22   7   14.76    8.97
   1 -22   8   38.01   11.20
  -1  21  19   22.99    9.66
   1 -21 -19   14.92    7.17
   1 -21 -18    7.64    6.90
  -1  21  18   -9.82    8.87
   1 -21 -17    9.66    6.48
  -1  21  17    7.91    8.87
  -1  21  16   15.40    9.02
   1 -21 -16   21.61    7.43
   1 -21 -16   37.90   15.24
   1 -21 -15   -7.49    6.95
  -1  21  15  -10.83    8.28
   1 -21 -15  -17.41   13.48
   1 -21 -14   43.74   14.65
  -1  21  14   22.35    9.50
   1 -21 -14   27.07    7.86
  -1  21  13   18.42    9.50
   1 -21 -13    2.81    6.37
   1 -21 -12   27.82    7.54
  -1  21  12   11.31    9.45
   1 -21 -11   10.09    6.85
  -1  21  11    8.49    8.33
   1 -21 -10   11.73    6.11
  -1  21  10   -0.85    8.02
  -1  21   9   13.38    8.65
   1 -21  -9    1.75    6.32
   1 -21  -8   16.03    7.06
  -1  21   8    4.19    8.18
  -1  21   7    5.63    8.23
   1 -21  -7   12.32    7.33
  -1  21   6    1.80    8.02
   1 -21  -6    4.41    6.48
  -1  21   5    3.24    8.23
   1 -21  -5    1.49    6.64
  -1  21   4   35.78    9.82
   1 -21  -4   49.16    9.56
   1 -21  -3   68.32   10.83
  -1  21   3   58.29   11.68
  -1  21   2   54.57   12.05
   1 -21  -2   45.97    8.55
  -1  21   1    4.72    8.76
   1 -21  -1   12.69    7.64
   1 -21   0   11.04    7.54
  -1  21   0   19.38   10.41
   1 -21   1    7.01    6.90
  -1  21  -1    1.80    9.87
   1 -21   2   26.44    8.07
   1 -21   3   15.87    7.70
   1 -21   4   16.03    8.12
   1 -21   5    1.38    7.11
   1 -21   6   32.06    9.13
   1 -21   7   29.62    9.08
   1 -21   8   51.97   11.25
   1 -21   9    4.51    8.23
   1 -21  10   13.32    9.77
   1 -21  11   79.53   12.63
   1 -20 -20   20.12    7.33
  -1  20  20   12.79    8.28
   1 -20 -19    4.67    6.85
  -1  20  19   20.17    9.08
   1 -20 -18   20.70    6.90
  -1  20  18   -2.76    8.28
   1 -20 -18   19.38   13.17
  -1  20  17   14.76    9.08
   1 -20 -17    8.12    6.64
   1 -20 -16   10.35    6.32
  -1  20  16   30.47    9.29
   1 -20 -16   15.50   11.52
  -1  20  15    7.59    7.59
   1 -20 -15    6.00    5.84
   1 -20 -15   14.60   12.69
   1 -20 -14   -6.48    6.05
  -1  20  14    3.88    7.49
   1 -20 -13   23.78    7.38
  -1  20  13   27.76    9.29
  -1  20  12   -7.43    7.75
   1 -20 -12    7.70    5.95
  -1  20  11   -5.52    7.64
   1 -20 -11    9.56    6.32
   1 -20 -10   20.01    7.11
  -1  20  10   21.98    8.87
  -1  20   9   18.79    8.28
   1 -20  -9    9.82    5.68
   1 -20  -8   -1.22    5.52
  -1  20   8  -12.74    8.71
  -1  20   7   21.61    8.28
   1 -20  -7   27.82    7.38
   1 -20  -6  120.30   11.63
  -1  20   6  114.51   12.69
  -1  20   5   62.17   10.62
   1 -20  -5   49.58    9.08
   1 -20  -4   77.77   10.41
  -1  20   4   58.61   11.10
  -1  20   3  143.07   14.17
   1 -20  -3  157.62   13.11
   1 -20  -2   65.51    9.34
  -1  20   2   49.00    9.87
  -1  20   1   28.45    9.24
   1 -20  -1   22.72    7.80
   1 -20   0   10.94    7.01
  -1  20   0   -2.34    8.65
  -1  20  -1   96.73   13.38
   1 -20   1  104.48   11.47
   1 -20   2   43.64    9.40
  -1  20  -2   29.84   10.41
   1 -20   3  263.69   17.25
  -1  20  -3  239.53   19.38
  -1  20  -4   31.16   11.25
   1 -20   4   25.43    8.55
   1 -20   5   11.89    7.43
  -1  20  -5   13.17    8.87
   1 -20   6    1.33    6.80
  -1  20  -6   22.08   11.20
   1 -20   7   21.55    9.24
   1 -20   8   48.36   10.14
   1 -20   9   31.22    9.66
   1 -20  10   29.99    9.40
   1 -20  11    7.91    8.60
   1 -20  12   49.80   11.47
   1 -20  13    0.05    8.65
   1 -20  14   20.28   10.51
  -1  19  21   24.47    8.65
   1 -19 -21   15.98    6.32
  -1  19  20    4.19    7.33
   1 -19 -20    6.21    6.64
   1 -19 -20   23.62   14.81
   1 -19 -19   15.45   12.05
   1 -19 -19    2.34    5.57
  -1  19  19   -0.27    7.96
  -1  19  18    3.72    7.06
   1 -19 -18   12.74    6.32
   1 -19 -18   26.97   13.22
   1 -19 -17   14.07   11.25
  -1  19  17    8.55    6.80
   1 -19 -17    0.27    5.57
  -1  19  16   12.37    6.95
   1 -19 -16   21.39    6.32
   1 -19 -16   20.76   11.79
   1 -19 -15   10.51   11.84
   1 -19 -15    2.92    5.36
  -1  19  15    0.53    6.69
  -1  19  14   29.36    7.70
   1 -19 -14   43.74    7.54
   1 -19 -13   61.63    8.60
  -1  19  13   53.99    9.45
   1 -19 -12   21.61    6.26
  -1  19  12    8.07    6.85
  -1  19  11   12.53    7.22
   1 -19 -11   -4.62    5.20
   1 -19 -10   26.28    6.64
  -1  19  10    6.95    6.74
  -1  19   9   76.71   10.30
   1 -19  -9   94.28    9.82
   1 -19  -8    2.39    5.68
  -1  19   8   -0.74    7.27
   1 -19  -7   12.95    6.26
  -1  19   7   17.52    8.44
   1 -19  -6   35.99    7.75
  -1  19   6   27.66    8.28
  -1  19   5   -1.22    7.17
   1 -19  -5    2.02    5.63
   1 -19  -4  140.79   12.05
  -1  19   4  150.18   13.70
  -1  19   3   25.22    9.02
   1 -19  -3   29.20    7.64
  -1  19   2   26.44    8.60
   1 -19  -2   26.81    7.59
   1 -19  -1   -0.42    5.57
  -1  19   1    3.93    7.43
  -1  19   0   32.76    9.34
   1 -19   0   28.77    7.17
  -1  19  -1   39.87    9.50
   1 -19   1   38.86    7.75
   1 -19   2   64.77    9.29
  -1  19  -2   74.27   12.10
  -1  19  -3   11.89    8.65
   1 -19   3    5.95    6.00
  -1  19  -4   -1.33    8.07
   1 -19   4    0.00    6.42
  -1  19  -5  298.35   20.44
   1 -19   5  296.34   18.21
  -1  19  -6   13.96    8.97
   1 -19   6    8.55    7.01
  -1  19  -7   10.67    9.45
   1 -19   7   31.11    8.76
   1 -19   8    7.43    8.07
   1 -19   8   18.53   15.29
   1 -19   9   27.87    9.66
   1 -19   9   22.19    8.18
   1 -19   9   19.70   14.44
   1 -19  10   40.72   15.82
   1 -19  10    9.13    7.49
   1 -19  11   45.55   10.09
   1 -19  12   20.28    8.81
   1 -19  13   59.25   11.36
   1 -19  14    5.20    8.39
   1 -19  15   64.18   11.94
   1 -19  16   43.16   11.41
   1 -19  17    2.97   10.30
   1 -18 -22   20.97    6.53
  -1  18  22   19.11    7.70
   1 -18 -22   21.61   15.55
   1 -18 -21   -0.27   12.26
   1 -18 -21    4.41    5.63
  -1  18  21   -0.21    6.90
   1 -18 -20    8.55   12.37
  -1  18  20    6.21    6.85
   1 -18 -20    5.95    5.36
   1 -18 -19   11.73   11.84
  -1  18  19   -9.56    7.11
   1 -18 -19    1.43    5.68
   1 -18 -18   11.52    5.84
  -1  18  18    3.82    6.26
   1 -18 -18    4.51   10.94
  -1  18  17    1.22    6.21
   1 -18 -17    8.55    5.73
   1 -18 -17   21.18   11.94
   1 -18 -16   59.88   13.43
   1 -18 -16   64.40    7.91
  -1  18  16   60.20    9.40
  -1  18  15   44.17    8.44
   1 -18 -15   57.44   13.86
   1 -18 -15   36.52    6.74
   1 -18 -14   27.18   11.10
   1 -18 -14   15.40    5.41
  -1  18  14   13.38    7.01
  -1  18  13    8.81    6.00
   1 -18 -13    5.84    5.15
   1 -18 -12   22.99    5.79
  -1  18  12   19.43    6.95
   1 -18 -11    5.26    5.41
  -1  18  11    2.44    6.05
   1 -18 -10    4.09    4.83
  -1  18  10   15.29    7.70
  -1  18   9   20.17    6.80
   1 -18  -9   13.17    5.41
  -1  18   8   47.14    8.71
   1 -18  -8   47.30    7.38
   1 -18  -7   10.51    5.68
  -1  18   7   -1.22    6.42
   1 -18  -6   42.26    7.64
  -1  18   6   37.64    8.28
   1 -18  -5   11.20    5.84
  -1  18   5    3.13    6.21
   1 -18  -4   30.58    6.95
  -1  18   4   34.98    8.18
   1 -18  -3   15.08    6.21
  -1  18   3    8.39    6.37
   1 -18  -2   72.09    9.18
  -1  18   2   67.37   10.03
   1 -18  -1   11.63    5.89
  -1  18   1   24.85    8.18
  -1  18   0   38.33    9.34
   1 -18   0   38.86    7.64
  -1  18  -1   76.66   11.31
   1 -18   1   80.96    9.40
  -1  18  -2  411.80   21.66
   1 -18   2  428.15   19.70
   1 -18   3   38.01    8.18
  -1  18  -3   36.21    9.18
   1 -18   4   39.39    8.18
  -1  18  -4   39.34    9.93
   1 -18   5    5.20    6.48
  -1  18  -5  -15.50    8.44
  -1  18  -6  203.43   16.99
   1 -18   6  240.54   15.87
   1 -18   7    8.55    6.69
  -1  18  -7   23.84    9.13
   1 -18   8   90.20   19.11
   1 -18   8   66.52   10.35
   1 -18   9  256.84   25.91
   1 -18   9  213.09   15.82
   1 -18  10   24.53   14.49
   1 -18  10   37.37    9.87
   1 -18  10   34.61    8.39
   1 -18  11   60.79   11.36
   1 -18  11   53.78   10.46
   1 -18  11   41.62   15.77
   1 -18  12   29.68   14.44
   1 -18  12   22.88   10.35
   1 -18  12   21.29    8.55
   1 -18  13    5.36    7.91
   1 -18  14    8.12    8.65
   1 -18  15   28.99    9.66
   1 -18  16    9.18    8.81
   1 -18  17   14.44    9.50
   1 -18  18   22.14   10.35
   1 -18  19   41.04   11.31
  -1  17  23    4.14    6.21
   1 -17 -23    3.56    5.73
   1 -17 -23    1.59   12.90
   1 -17 -22   47.30    7.49
  -1  17  22   27.45    7.01
  -1  17  21    9.24    6.48
   1 -17 -21   11.25   12.95
   1 -17 -21   16.56    5.79
   1 -17 -20   40.98    7.11
   1 -17 -20   62.11   14.81
  -1  17  20   42.20    7.75
  -1  17  19   13.32    6.80
   1 -17 -19   11.20    5.31
   1 -17 -18    9.40   10.94
   1 -17 -18    5.84    5.10
  -1  17  18    9.50    5.79
   1 -17 -17    8.18   10.14
   1 -17 -17   17.25    5.95
  -1  17  17    8.71    5.89
  -1  17  16    2.39    5.68
   1 -17 -16    5.04    4.78
   1 -17 -16    3.45    9.50
  -1  17  15    0.32    5.63
   1 -17 -15   -1.80    4.67
   1 -17 -14   87.59   14.65
  -1  17  14   78.04    9.40
   1 -17 -14   79.79    8.07
  -1  17  13    4.57    6.05
   1 -17 -13   -1.22    4.88
  -1  17  12   38.01    7.06
   1 -17 -12   41.83    6.69
  -1  17  11   21.24    7.01
   1 -17 -11   14.39    5.41
   1 -17 -10   71.30    8.02
  -1  17  10   71.40    8.87
   1 -17  -9   17.94    5.20
  -1  17   9   26.01    7.06
   1 -17  -8   40.40    6.74
  -1  17   8   35.67    7.70
  -1  17   7   69.23    9.34
   1 -17  -7   59.99    7.54
  -1  17   6   59.88    8.76
   1 -17  -6   71.40    8.12
  -1  17   5   17.52    7.54
   1 -17  -5    4.83    4.67
   1 -17  -4   26.60    6.74
  -1  17   4   20.65    6.80
   1 -17  -3    8.28    5.73
  -1  17   3    6.11    6.05
  -1  17   2   12.21    6.74
   1 -17  -2   10.67    5.95
  -1  17   1   36.21    8.33
   1 -17  -1   38.22    7.38
   1 -17   0   41.51    7.43
  -1  17   0   39.39    8.33
  -1  17  -1   62.38    9.87
   1 -17   1   73.37    9.34
  -1  17  -2   83.35   10.88
   1 -17   2   72.25    9.34
   1 -17   3  947.72   28.51
  -1  17  -3  850.84   29.57
   1 -17   4   10.51    6.11
  -1  17  -4   -9.56    8.39
  -1  17  -5    6.11    7.80
   1 -17   5   15.29    6.90
   1 -17   6    2.34    6.32
  -1  17  -6   -1.86    7.11
   1 -17   7    7.33    6.69
  -1  17  -7   -0.85    7.38
  -1  17  -8   21.71    9.24
   1 -17   8   21.24    7.01
   1 -17   9   38.75    8.65
   1 -17   9    5.84   13.48
   1 -17  10   86.90   11.68
   1 -17  10  100.44   11.31
   1 -17  10   94.12   18.16
   1 -17  11   62.43   10.67
   1 -17  11   67.37   10.67
   1 -17  12    4.14    7.64
   1 -17  12   -3.82    7.33
   1 -17  12    7.33   13.59
   1 -17  13  134.52   13.80
   1 -17  13  128.37   14.17
   1 -17  13   96.88   18.05
   1 -17  14   72.78   11.31
   1 -17  14   84.14   20.12
   1 -17  14   57.33   11.31
   1 -17  15   12.69    9.18
   1 -17  15    1.11    7.75
   1 -17  15   25.96   17.57
   1 -17  16   23.31    9.87
   1 -17  17   27.07   10.14
   1 -17  18   -4.35    8.97
   1 -17  19   20.23    9.93
   1 -17  20  105.22   14.39
   1 -17  21    9.87    9.87
   1 -16 -24   69.28    8.02
  -1  16  24   68.75    8.39
   1 -16 -24   82.34   17.89
   1 -16 -23   15.02    5.73
   1 -16 -23   19.16   13.38
  -1  16  23   16.35    6.64
   1 -16 -22   42.68    6.90
   1 -16 -22   57.71   15.55
  -1  16  21   28.99    6.95
   1 -16 -21   31.91    6.26
   1 -16 -21   48.04   13.96
   1 -16 -20   22.30   12.53
  -1  16  20   24.31    6.53
   1 -16 -20   24.95    6.00
  -1  16  19  165.79   11.47
   1 -16 -19  152.79   18.21
   1 -16 -19  148.49    9.98
   1 -16 -18   17.15    5.63
   1 -16 -18   34.98   12.00
  -1  16  18   16.56    6.48
   1 -16 -17   29.04    6.11
   1 -16 -17   25.69   10.88
  -1  16  17   26.38    6.53
  -1  16  16   30.84    7.11
   1 -16 -16   27.23   11.47
   1 -16 -16   26.54    5.79
   1 -16 -15   -1.86    9.13
   1 -16 -15    1.91    4.25
  -1  16  15   -2.39    5.36
   1 -16 -14   64.71   13.32
  -1  16  14   69.60    8.81
   1 -16 -14   70.98    7.54
   1 -16 -13    6.42    4.51
  -1  16  13   13.48    5.95
   1 -16 -12   95.40    8.65
  -1  16  12   96.14    9.56
  -1  16  11    6.80    5.52
   1 -16 -11   -4.83    4.94
  -1  16  10   29.99    6.69
   1 -16 -10   26.33    6.00
  -1  16   9   52.93    7.70
   1 -16  -9   43.43    6.58
  -1  16   8   82.66    9.34
   1 -16  -8   80.85    8.18
   1 -16  -7   22.03    5.57
  -1  16   7   15.40    6.32
   1 -16  -6   25.32    5.84
  -1  16   6   20.17    6.80
   1 -16  -5   21.55    5.89
  -1  16   5   17.68    6.16
  -1  16   4    0.53    5.68
   1 -16  -4    7.54    4.83
  -1  16   3   11.89    5.95
   1 -16  -3   19.59    5.79
  -1  16   2   67.05    9.08
   1 -16  -2   71.88    8.55
  -1  16   1  150.08   12.21
   1 -16  -1  153.05   11.20
  -1  16   0  369.38   18.16
   1 -16   0  353.14   16.24
  -1  16  -1   77.24   10.09
   1 -16   1   87.81    9.45
   1 -16   2   53.03    8.12
  -1  16  -2   41.20    8.18
   1 -16   3  547.55   21.02
  -1  16  -3  531.14   23.09
   1 -16   4  126.83   11.31
  -1  16  -4  120.03   12.58
   1 -16   5   20.97    6.53
  -1  16  -5   13.91    7.43
   1 -16   6  185.12   13.43
  -1  16  -6  180.71   14.97
   1 -16   7    9.98    6.11
  -1  16  -7   18.37    8.23
   1 -16   8   45.87    8.39
   1 -16   8   21.61   15.71
  -1  16  -8   37.75    9.08
   1 -16   9    2.71    6.32
   1 -16   9   10.94   14.55
   1 -16  10  167.49   15.18
   1 -16  10  187.77   14.76
   1 -16  11   30.90    9.29
   1 -16  11   37.80    8.81
   1 -16  12   34.45    9.50
   1 -16  12   29.52   14.39
   1 -16  12   37.43    9.24
   1 -16  13   17.89   14.17
   1 -16  13   44.28    9.66
   1 -16  13   31.53    9.24
   1 -16  14   15.40    8.02
   1 -16  14    5.57   13.17
   1 -16  14    3.03    7.17
   1 -16  15    4.03    7.33
   1 -16  15    2.55   13.86
   1 -16  15    1.91    8.12
   1 -16  16    6.21   14.97
   1 -16  16   10.78    9.02
   1 -16  16    2.60    7.49
   1 -16  17   -1.22    7.75
   1 -16  17   -6.37    9.87
   1 -16  18   20.60    9.93
   1 -16  19    0.85    8.33
   1 -16  20  157.88   16.09
   1 -16  21   12.05    9.72
   1 -16  22    5.10    9.72
   1 -16  23    4.72   10.41
   1 -15 -25   21.50   14.39
   1 -15 -25   13.75    5.36
  -1  15  25   13.64    6.42
  -1  15  24   -6.64    6.00
   1 -15 -24   -3.56    4.78
   1 -15 -23    6.00   11.57
  -1  15  23   -1.38    5.47
   1 -15 -23   11.47    5.26
   1 -15 -22   42.36   14.44
   1 -15 -22   34.19    6.11
  -1  15  22   33.39    6.48
  -1  15  21   53.46    7.54
   1 -15 -21   56.70    6.80
   1 -15 -21   73.74   15.77
  -1  15  20    5.04    5.36
   1 -15 -20   14.49   10.67
   1 -15 -20   10.19    4.88
   1 -15 -19    4.09    9.50
  -1  15  19    1.75    4.94
   1 -15 -19    2.87    4.51
   1 -15 -18   26.23    5.36
   1 -15 -18   22.83   10.46
  -1  15  18   19.16    5.47
   1 -15 -17   43.64    6.48
   1 -15 -17   48.26   12.21
  -1  15  17   44.86    7.22
  -1  15  16   15.34    6.00
   1 -15 -16   23.57    9.56
   1 -15 -16   12.69    4.83
  -1  15  15    9.87    5.10
   1 -15 -15   -2.18    8.28
   1 -15 -15   12.10    4.88
   1 -15 -14   54.89   11.31
  -1  15  14   52.56    7.33
   1 -15 -14   53.09    6.64
   1 -15 -13    7.33    7.64
  -1  15  13    8.33    5.57
   1 -15 -13    9.18    4.30
   1 -15 -12    2.12    3.93
  -1  15  12   -0.58    4.99
  -1  15  11    3.88    5.31
   1 -15 -11   -6.21    4.67
   1 -15 -10   39.92    6.37
  -1  15  10   35.30    6.37
  -1  15   9   15.08    5.89
   1 -15  -9    7.96    3.98
   1 -15  -8   72.15    7.54
  -1  15   8   92.74    9.18
   1 -15  -7    2.50    3.93
  -1  15   7    7.11    5.41
  -1  15   6    1.59    4.88
   1 -15  -6    6.32    4.03
  -1  15   5   86.64    9.02
   1 -15  -5   80.22    8.28
   1 -15  -4    7.96    4.83
  -1  15   4   11.47    5.63
   1 -15  -3  149.02   10.35
  -1  15   3  115.84   10.25
   1 -15  -2   54.26    7.11
  -1  15   2   53.62    7.96
  -1  15   1  178.22   12.42
   1 -15  -1  222.33   12.63
  -1  15   0  219.09   13.75
   1 -15   0  237.89   13.27
  -1  15  -1   92.48    9.66
   1 -15   1  105.64    9.40
  -1  15  -2  155.87   12.63
   1 -15   2  201.68   12.69
   1 -15   3  448.91   18.10
  -1  15  -3  441.00   20.07
  -1  15  -4   85.15   10.56
   1 -15   4   91.95    9.45
  -1  15  -5   66.25   10.14
   1 -15   5   67.95    8.23
  -1  15  -6   13.32    7.22
   1 -15   6    2.34    5.26
  -1  15  -7  243.67   16.24
   1 -15   7  270.06   15.34
   1 -15   8  397.84   19.06
  -1  15  -8  340.19   19.11
   1 -15   9    6.69   10.88
   1 -15   9    2.97    6.16
   1 -15  10  238.15   16.35
   1 -15  10  217.29   21.50
   1 -15  10  245.69   15.71
   1 -15  11   66.57   10.14
   1 -15  11   49.11    9.18
   1 -15  12   27.50   12.42
   1 -15  12   56.64    9.18
   1 -15  12   48.95    9.40
   1 -15  13    4.30    6.48
   1 -15  13   -2.76    7.06
   1 -15  14  173.76   15.24
   1 -15  14  147.74   20.39
   1 -15  14  183.42   14.71
   1 -15  15  121.68   12.79
   1 -15  15  127.20   20.65
   1 -15  15  118.92   13.59
   1 -15  16   -3.88   14.12
   1 -15  16   17.31    8.12
   1 -15  16   15.40    7.75
   1 -15  17   90.09   12.32
   1 -15  17   84.09   12.74
   1 -15  17   59.78   17.09
   1 -15  18   33.87    9.98
   1 -15  18   37.85    9.66
   1 -15  18   49.96   16.40
   1 -15  19    8.33    9.34
   1 -15  19    0.90    7.96
   1 -15  20   10.35    8.44
   1 -15  21    3.13    8.87
   1 -15  22   -2.07    9.24
   1 -15  23    5.95   10.09
   1 -15  24   22.19   10.46
   1 -15  25   22.56   11.68
   1 -14 -26   36.79   15.24
  -1  14  26   36.84    6.21
  -1  14  25   26.81    6.21
   1 -14 -25   30.58   13.48
   1 -14 -25   27.76    6.05
   1 -14 -24    5.04    4.67
  -1  14  24    7.54    5.52
   1 -14 -24    1.38   10.83
   1 -14 -23   -0.27    4.30
  -1  14  23    0.90    5.15
   1 -14 -23  -13.27   11.15
  -1  14  22   43.11    6.69
   1 -14 -22   45.12    6.21
   1 -14 -22   49.16   13.27
  -1  14  21   49.42    7.11
   1 -14 -21   45.66    6.16
   1 -14 -20  106.60   15.98
   1 -14 -20   93.27    7.59
  -1  14  20   87.44    7.80
   1 -14 -19  209.48   19.32
   1 -14 -19  206.56   10.56
  -1  14  19  203.38   10.94
   1 -14 -18    7.11    8.49
   1 -14 -18   25.59    5.26
  -1  14  18   22.83    5.84
   1 -14 -17  151.03    9.08
   1 -14 -17  166.11   17.41
  -1  14  17  166.91   10.46
  -1  14  16   71.46    7.59
   1 -14 -16   78.09   12.42
   1 -14 -16   66.73    6.64
   1 -14 -15   53.46    6.11
  -1  14  15   68.11    7.49
   1 -14 -15   69.23   12.00
   1 -14 -14   13.75    8.55
   1 -14 -14   14.71    3.98
  -1  14  14   15.98    5.36
  -1  14  13   95.24    8.33
   1 -14 -13   95.19    7.54
   1 -14 -13   99.33   12.95
   1 -14 -12   23.89    5.10
  -1  14  12   17.63    5.31
   1 -14 -11    4.35    3.82
  -1  14  11    8.76    5.26
  -1  14  10   -0.64    4.41
   1 -14 -10    2.55    3.77
   1 -14  -9    1.06    4.14
  -1  14   9   10.56    4.72
   1 -14  -8   56.80    6.48
  -1  14   8   68.27    7.86
   1 -14  -7    9.08    4.62
  -1  14   7   -0.64    4.67
  -1  14   6  140.31    9.98
   1 -14  -6  135.37    9.13
  -1  14   5   98.64    8.76
   1 -14  -5   85.10    7.49
  -1  14   4    2.02    4.62
   1 -14  -4    1.86    3.93
  -1  14   3   87.49    8.44
   1 -14  -3   78.25    7.59
   1 -14  -2    0.42    3.98
  -1  14   2    0.74    4.72
  -1  14   1   31.69    6.16
   1 -14  -1   23.09    5.41
   1 -14   0    9.77    4.88
  -1  14   0    4.78    4.46
  -1  14  -1   11.63    5.41
   1 -14   1    0.96    4.30
   1 -14   2 1373.43   29.68
  -1  14  -2 1342.80   31.43
   1 -14   3   25.32    5.31
  -1  14  -3   33.92    7.43
  -1  14  -4  199.34   13.43
   1 -14   4  195.95   12.16
   1 -14   5  146.10   10.99
  -1  14  -5  139.67   11.79
   1 -14   6   32.81    7.17
  -1  14  -6   28.30    7.22
  -1  14  -7  121.73   11.52
   1 -14   7  116.21   10.51
  -1  14  -8  101.19   11.15
   1 -14   8  126.99   18.05
   1 -14   8   99.65    9.82
   1 -14   9  261.56   15.24
   1 -14   9  279.51   22.51
   1 -14  10  515.80   22.19
   1 -14  10  517.34   20.92
   1 -14  10  538.68   29.62
   1 -14  11    3.61    6.48
   1 -14  11   11.36    6.32
   1 -14  11   11.04   10.99
   1 -14  12   18.42    7.27
   1 -14  12   11.73   11.73
   1 -14  12   16.51    7.75
   1 -14  13    4.35    6.26
   1 -14  13   11.73    7.59
   1 -14  13   21.71   14.44
   1 -14  14  115.73   12.10
   1 -14  14  104.85   12.21
   1 -14  15   13.59   13.43
   1 -14  15   -6.00    6.64
   1 -14  15    8.76    7.06
   1 -14  16   45.60   13.59
   1 -14  16   47.78    9.08
   1 -14  16   43.00    9.56
   1 -14  17  264.06   17.63
   1 -14  17  212.35   22.35
   1 -14  17  234.38   17.47
   1 -14  18    6.64    7.38
   1 -14  18   10.41    7.80
   1 -14  18   24.26   14.07
   1 -14  19   32.60   14.81
   1 -14  19    8.07    7.38
   1 -14  19   19.70    9.02
   1 -14  20   -1.91    8.07
   1 -14  20  -14.71    9.50
   1 -14  21    3.50    8.92
   1 -14  21   -2.81    7.96
   1 -14  22   -1.75    8.49
   1 -14  23    3.45    8.65
   1 -14  24   19.54   10.51
   1 -14  25   -3.93   10.09
   1 -14  26    7.91   10.41
   1 -13 -27   -6.90   13.27
  -1  13  26   40.40    6.58
   1 -13 -26   48.31    7.01
   1 -13 -26   58.50   15.18
   1 -13 -25   30.79    5.89
   1 -13 -25   49.85   14.23
  -1  13  25   43.96    6.37
   1 -13 -24   11.94   11.10
  -1  13  24   21.66    5.63
   1 -13 -24   12.00    5.10
  -1  13  23   31.64    5.95
   1 -13 -23   26.65   10.83
   1 -13 -23   35.73    5.79
   1 -13 -22    9.08    4.62
   1 -13 -22   11.31    9.98
  -1  13  22   11.57    5.04
   1 -13 -21  104.74   15.66
  -1  13  21   82.34    7.59
   1 -13 -21   95.24    7.54
  -1  13  20   78.36    7.38
   1 -13 -20   94.12   14.81
   1 -13 -20   80.75    7.27
   1 -13 -19  238.79   10.67
  -1  13  19  234.06   11.36
   1 -13 -19  253.92   20.70
   1 -13 -18  305.78   12.05
  -1  13  18  304.78   12.85
   1 -13 -18  346.93   22.72
   1 -13 -17    5.36    3.66
  -1  13  17    4.78    4.25
   1 -13 -17    1.11    8.28
  -1  13  16  193.40   10.41
   1 -13 -16  188.89   16.99
   1 -13 -16  165.58    9.02
   1 -13 -15   55.90   10.72
  -1  13  15   44.01    5.84
   1 -13 -15   39.13    5.20
  -1  13  14   12.00    4.41
   1 -13 -14   19.64    4.30
   1 -13 -14   12.74    7.80
  -1  13  13   16.46    4.78
   1 -13 -13   16.35    3.93
   1 -13 -13   28.67    8.55
   1 -13 -12  133.57    8.12
  -1  13  12  138.03    8.81
  -1  13  11    9.77    4.41
   1 -13 -11   15.55    4.14
  -1  13  10    4.99    4.19
   1 -13 -10    2.87    3.34
  -1  13   9    4.46    4.14
   1 -13  -9    7.91    3.88
   1 -13  -8   45.76    5.47
  -1  13   8   45.39    6.21
  -1  13   7   36.58    5.73
   1 -13  -7   36.90    5.10
   1 -13  -6    4.41    3.66
  -1  13   6   10.19    4.67
  -1  13   5    6.95    4.46
   1 -13  -5    2.92    3.34
  -1  13   4   -2.18    3.98
   1 -13  -4    5.68    3.93
  -1  13   3   58.50    6.90
   1 -13  -3   54.36    6.26
   1 -13  -2   18.21    4.78
  -1  13   2   12.00    5.10
   1 -13  -1  169.35   10.14
  -1  13   1  159.69   10.46
   1 -13   0   23.89    5.47
  -1  13   0   27.76    5.79
   1 -13   1   45.02    6.00
  -1  13  -1   38.81    6.48
   1 -13   2  115.94    9.02
  -1  13  -2  111.38    9.45
   1 -13   3  350.80   15.18
  -1  13  -3  343.11   15.87
  -1  13  -4   33.98    6.74
   1 -13   4   46.03    6.48
   1 -13   5   37.27    6.42
  -1  13  -5   40.56    7.64
   1 -13   6   21.08    5.68
  -1  13  -6   30.95    7.17
   1 -13   7   -1.11    4.72
  -1  13  -7    0.74    5.57
   1 -13   8   62.06    8.18
   1 -13   8   79.63   14.92
  -1  13  -8   78.52    9.24
   1 -13   9  378.83   24.37
   1 -13   9  358.39   17.04
   1 -13  10    9.93    9.66
   1 -13  10   33.82    7.75
   1 -13  10   31.59    7.17
   1 -13  11   67.26    9.08
   1 -13  11   60.36   12.26
   1 -13  11   71.35    9.56
   1 -13  12   69.39   14.17
   1 -13  12   47.94    8.23
   1 -13  12   49.74    8.81
   1 -13  13   49.00    8.60
   1 -13  13   33.66    7.54
   1 -13  13   41.04   12.63
   1 -13  14   65.14    9.56
   1 -13  14   36.31   12.16
   1 -13  14   58.71    9.45
   1 -13  15  163.19   13.75
   1 -13  15  176.94   13.96
   1 -13  16  233.85   16.67
   1 -13  16  243.19   22.35
   1 -13  16  243.25   16.03
   1 -13  17   15.40    7.86
   1 -13  17   33.13   13.22
   1 -13  17   23.89    8.07
   1 -13  18  350.11   19.48
   1 -13  18  363.33   20.23
   1 -13  18  361.74   26.44
   1 -13  19   12.63    7.96
   1 -13  19    2.39    7.86
   1 -13  19   15.24   12.53
   1 -13  20    1.33    7.33
   1 -13  20    7.27   12.90
   1 -13  20   -0.11    7.22
   1 -13  21   47.41   15.45
   1 -13  21   20.81    8.71
   1 -13  21   31.11    9.77
   1 -13  22   44.86   10.56
   1 -13  22   38.28   10.35
   1 -13  23   17.78   10.56
   1 -13  23   30.31   10.30
   1 -13  24    7.91    9.61
   1 -13  25    4.51    9.82
   1 -13  26   25.06   10.25
   1 -13  27   11.57   10.62
   1 -13  28   22.19   11.52
   1 -12 -28   -2.55   13.38
   1 -12 -27    4.35   12.85
   1 -12 -27    4.94    4.88
  -1  12  27   -1.27    4.67
   1 -12 -26   12.48   12.69
   1 -12 -26   11.57    5.47
  -1  12  26    6.58    4.51
   1 -12 -25   51.81   14.02
  -1  12  25   34.14    5.79
   1 -12 -25   32.97    6.00
   1 -12 -24   30.63    5.52
   1 -12 -24   39.60   11.84
  -1  12  24   35.25    5.84
   1 -12 -23   16.30   10.72
  -1  12  23   22.19    5.20
   1 -12 -23   18.26    5.04
   1 -12 -22   -6.95   10.09
   1 -12 -22    2.76    3.93
  -1  12  22    3.19    3.98
   1 -12 -21   20.97   10.67
  -1  12  21    8.76    4.35
   1 -12 -21   11.25    4.51
   1 -12 -20   83.67   13.48
  -1  12  20   78.25    6.85
   1 -12 -20   64.61    6.26
   1 -12 -19    1.96    8.33
   1 -12 -19   -3.56    3.82
  -1  12  19    3.93    3.82
   1 -12 -18   82.34    6.95
  -1  12  18   74.16    6.48
   1 -12 -18   92.16   13.17
   1 -12 -17   32.49   10.25
   1 -12 -17   21.13    4.30
  -1  12  17   21.18    4.62
   1 -12 -16    2.71    3.45
  -1  12  16    6.42    4.03
   1 -12 -16    2.92    7.17
   1 -12 -15    3.19    3.29
  -1  12  15    0.90    3.66
   1 -12 -14    7.75    3.82
   1 -12 -14    8.39    8.55
  -1  12  14    3.34    4.14
  -1  12  13   69.60    6.74
   1 -12 -13   68.38    6.05
   1 -12 -13   78.68   10.88
   1 -12 -12   70.87    6.37
  -1  12  12   74.85    6.74
   1 -12 -12   82.23   11.31
   1 -12 -11    1.01    3.08
  -1  12  11    1.96    3.50
   1 -12 -10   59.94    5.95
  -1  12  10   63.49    6.64
   1 -12  -9   10.46    3.66
  -1  12   9    6.32    3.77
   1 -12  -8  210.17    9.98
  -1  12   8  191.06   10.19
  -1  12   7    7.91    4.03
   1 -12  -7   17.15    4.09
   1 -12  -6   14.49    4.14
  -1  12   6    7.43    3.66
   1 -12  -5    6.37    3.50
  -1  12   5    4.09    3.66
  -1  12   4    6.26    4.19
   1 -12  -4    7.80    3.77
  -1  12   3  268.41   12.26
   1 -12  -3  245.58   11.31
  -1  12   2   16.93    4.83
   1 -12  -2   30.26    4.94
  -1  12   1    8.97    4.78
   1 -12  -1    4.14    4.03
   1 -12   0  189.89   10.35
  -1  12   0  171.95   10.46
  -1  12  -1   96.67    8.49
   1 -12   1   94.92    7.91
  -1  12  -2  146.10   10.46
   1 -12   2  159.21   10.25
   1 -12   3   91.52    7.96
  -1  12  -3   90.20    8.71
   1 -12   4  192.50   11.31
  -1  12  -4  174.29   11.79
   1 -12   5   18.10    5.47
  -1  12  -5   18.42    6.48
  -1  12  -6  677.98   22.72
   1 -12   6  692.69   21.13
  -1  12  -7    5.47    5.68
   1 -12   7    2.23    4.46
   1 -12   8  276.00   14.33
   1 -12   8  284.66   21.82
  -1  12  -8  263.42   15.18
   1 -12   9    5.10    4.99
   1 -12   9    8.44    8.44
   1 -12  10  144.29   11.15
   1 -12  10  123.43   10.88
   1 -12  10  144.61   15.66
   1 -12  11   30.68   11.89
   1 -12  11   35.67    6.85
   1 -12  11   28.61    7.43
   1 -12  12    3.24   10.51
   1 -12  12    7.33    5.68
   1 -12  12   11.41    5.95
   1 -12  13   41.51    8.33
   1 -12  13   50.22    8.65
   1 -12  13   66.04   14.86
   1 -12  14  267.03   23.41
   1 -12  14  295.86   16.14
   1 -12  14  293.95   16.83
   1 -12  15  116.58   16.72
   1 -12  15  137.34   11.94
   1 -12  15  129.06   12.48
   1 -12  16    8.28    6.26
   1 -12  16    7.80    6.11
   1 -12  17  143.18   18.32
   1 -12  17  147.42   13.17
   1 -12  17  132.29   13.38
   1 -12  18  232.05   21.98
   1 -12  18  229.29   15.93
   1 -12  19   75.76   10.99
   1 -12  19   65.72   10.51
   1 -12  19   70.61   15.40
   1 -12  20   -1.70    7.38
   1 -12  20    6.00    7.86
   1 -12  20    4.09   10.99
   1 -12  21    1.01   11.31
   1 -12  21    7.01    7.17
   1 -12  21    9.08    7.33
   1 -12  22   -5.15    7.27
   1 -12  22    0.80   11.36
   1 -12  22    1.11    7.38
   1 -12  23    9.61    8.55
   1 -12  23   14.28    8.07
   1 -12  24   26.38    9.72
   1 -12  24   45.39   10.94
   1 -12  25    9.77    9.45
   1 -12  26    3.50    9.13
   1 -12  27    6.26   10.25
   1 -12  28    5.63    9.72
   1 -12  29    9.34   11.63
  -1  11  28   17.57    5.68
   1 -11 -28    6.37   13.64
  -1  11  27   74.43    7.11
   1 -11 -27   58.93    6.53
   1 -11 -26    7.75   11.31
   1 -11 -26   28.08    5.63
  -1  11  26   11.63    4.35
  -1  11  25   -2.12    4.62
   1 -11 -25  -10.41   11.84
   1 -11 -25    2.23    4.14
   1 -11 -24   19.01   10.83
  -1  11  24   14.92    4.78
   1 -11 -24    7.80    4.72
   1 -11 -23    2.50    9.18
  -1  11  23    6.05    4.14
   1 -11 -23    7.38    4.51
   1 -11 -22    7.54    9.02
   1 -11 -22    5.84    3.98
  -1  11  22    2.39    4.09
   1 -11 -21   -1.43    3.50
  -1  11  21    0.53    3.82
   1 -11 -21   -3.72    8.07
   1 -11 -20  463.35   13.86
   1 -11 -20  495.52   27.02
  -1  11  20  487.88   14.55
  -1  11  19  116.53    7.86
   1 -11 -19  112.01    7.38
   1 -11 -19  121.68   15.40
   1 -11 -18  575.58   15.02
  -1  11  18  589.86   15.61
   1 -11 -18  582.48   27.92
  -1  11  17  172.85    8.76
   1 -11 -17  169.08   15.77
   1 -11 -17  177.63    8.81
   1 -11 -16   44.43   10.46
  -1  11  16   30.74    4.78
   1 -11 -16   30.53    4.30
  -1  11  15   55.10    5.68
   1 -11 -15   50.70    9.98
   1 -11 -15   56.70    5.36
  -1  11  14   30.37    4.88
   1 -11 -14   29.68    8.07
   1 -11 -14   28.83    4.46
   1 -11 -13    6.69    6.26
   1 -11 -13    0.58    2.81
  -1  11  13   -1.22    3.29
  -1  11  12    0.96    3.29
   1 -11 -12   -0.42    2.97
   1 -11 -12    0.85    5.73
   1 -11 -11   17.25    3.72
  -1  11  11   20.54    4.41
   1 -11 -10   17.84    3.98
  -1  11  10   25.80    4.88
   1 -11  -9  117.27    7.17
  -1  11   9  110.26    7.80
   1 -11  -8    0.00    2.76
  -1  11   8   13.70    4.57
  -1  11   7  106.18    7.59
   1 -11  -7  115.73    7.38
   1 -11  -6   97.58    7.11
  -1  11   6  100.02    7.33
   1 -11  -5  144.45    8.33
  -1  11   5  150.88    8.81
   1 -11  -4  118.86    7.80
  -1  11   4  135.90    8.60
   1 -11  -3  115.09    7.70
  -1  11   3  127.25    8.76
  -1  11   2  143.55    9.45
   1 -11  -2  129.69    8.55
  -1  11   1  606.47   18.16
   1 -11  -1  581.73   16.88
  -1  11   0   72.52    7.22
   1 -11   0   59.78    6.21
  -1  11  -1  147.53    9.77
   1 -11   1  151.46    9.34
   1 -11   2  354.31   14.33
  -1  11  -2  317.25   14.12
  -1  11  -3  459.31   17.31
   1 -11   3  458.31   15.98
   1 -11   4   73.42    7.64
  -1  11  -4   65.72    7.86
  -1  11  -5  680.42   21.61
   1 -11   5  702.46   20.33
   1 -11   6  586.72   18.95
  -1  11  -6  494.14   18.69
  -1  11  -7   -1.06    4.88
   1 -11   7   -2.92    4.19
  -1  11  -8    6.95    4.94
   1 -11   8    8.02    9.13
   1 -11   8    6.74    4.78
   1 -11   9   29.57    5.89
   1 -11   9   37.21   10.35
   1 -11  10    8.71    5.31
   1 -11  10   12.79    5.79
   1 -11  10    2.87    7.64
   1 -11  11  276.32   14.76
   1 -11  11  277.60   15.61
   1 -11  11  254.82   20.76
   1 -11  12   47.25    7.80
   1 -11  12   47.25    7.33
   1 -11  12   52.19   11.79
   1 -11  13    7.86    5.89
   1 -11  13    5.84    5.36
   1 -11  14   85.21    9.66
   1 -11  14   90.14   14.97
   1 -11  14   91.26    9.98
   1 -11  15  234.81   14.81
   1 -11  15  245.11   21.34
   1 -11  15  254.40   16.09
   1 -11  16   15.98    6.80
   1 -11  16   10.67    6.26
   1 -11  17   16.72    6.95
   1 -11  17   13.32   10.41
   1 -11  17    2.55    6.05
   1 -11  18  144.13   12.63
   1 -11  18  138.77   13.06
   1 -11  18  180.55   19.38
   1 -11  19   33.02    8.12
   1 -11  19   21.93   11.15
   1 -11  19   27.34    7.80
   1 -11  20   -0.48    6.26
   1 -11  20   -1.75   10.19
   1 -11  20    7.33    6.69
   1 -11  21   27.13    8.44
   1 -11  21   24.21   11.73
   1 -11  21   24.15    8.76
   1 -11  22  127.57   18.00
   1 -11  22  143.92   13.75
   1 -11  22  131.50   13.22
   1 -11  23   -8.12   12.00
   1 -11  23    7.86    7.70
   1 -11  23   -5.10    8.55
   1 -11  24   33.39    9.98
   1 -11  24   32.76    9.77
   1 -11  25   20.01    9.61
   1 -11  25   11.36    8.97
   1 -11  26   35.04    9.56
   1 -11  26   20.70    9.18
   1 -11  27   16.51    9.82
   1 -11  28   -0.42    9.66
   1 -11  29   12.16   10.67
   1 -11  30   53.25   12.79
   1 -10 -29   44.06   16.09
   1 -10 -28   27.45    5.57
  -1  10  28   39.39    5.52
   1 -10 -27   30.37    5.89
  -1  10  27   43.37    5.57
   1 -10 -26  107.50   17.04
   1 -10 -26   79.79    7.11
  -1  10  26  108.30    7.43
  -1  10  25    2.55    3.93
   1 -10 -25   10.51    4.78
   1 -10 -24    8.07   10.35
  -1  10  24    0.42    3.66
   1 -10 -24    5.36    3.93
   1 -10 -23    5.84    9.18
   1 -10 -23   13.32    4.25
  -1  10  23    8.71    3.72
   1 -10 -22   26.49    4.88
  -1  10  22   25.32    4.62
   1 -10 -22   21.08   10.56
  -1  10  21    5.84    3.56
   1 -10 -21    6.69    8.33
   1 -10 -21    2.65    3.61
   1 -10 -20    7.91    3.66
   1 -10 -20   16.88    9.45
  -1  10  20    8.76    3.72
  -1  10  19   23.31    4.25
   1 -10 -19   18.32    8.44
   1 -10 -19   18.74    3.77
  -1  10  18   67.26    5.63
   1 -10 -18   70.50    5.63
   1 -10 -18   77.35   11.84
   1 -10 -17   88.44    6.11
  -1  10  17   87.70    6.37
   1 -10 -17  110.48   13.48
   1 -10 -16    1.22    6.37
   1 -10 -16   10.88    3.24
  -1  10  16    7.64    3.77
  -1  10  15   58.02    5.36
   1 -10 -15   59.78    4.99
   1 -10 -15   53.88    9.56
   1 -10 -14  440.41   12.10
  -1  10  14  429.80   12.37
   1 -10 -14  474.44   22.30
  -1  10  13   16.88    3.72
   1 -10 -13   10.99    6.05
   1 -10 -13   13.54    3.24
   1 -10 -12   91.47    6.00
  -1  10  12   94.12    6.32
   1 -10 -11    2.34    5.68
   1 -10 -11    5.20    2.50
  -1  10  11   10.62    3.72
  -1  10  10    1.17    2.87
   1 -10 -10    1.91    2.65
   1 -10  -9    8.65    3.13
  -1  10   9    9.34    3.56
  -1  10   8  678.73   15.98
   1 -10  -8  671.40   15.02
   1 -10  -7   63.23    5.57
  -1  10   7   70.98    6.21
  -1  10   6  861.82   18.16
   1 -10  -6  838.63   17.31
  -1  10   5  803.59   17.89
   1 -10  -5  789.89   16.88
   1 -10  -4   21.29    4.14
  -1  10   4   24.26    4.25
   1 -10  -3  120.93    7.33
  -1  10   3  110.58    7.43
   1 -10  -2  125.66    7.75
  -1  10   2  116.90    7.86
   1 -10  -1   19.22    4.03
  -1  10   1   14.86    4.62
   1 -10   0   70.29    6.26
  -1  10   0   65.88    6.48
   1 -10   1  396.09   13.91
  -1  10  -1  378.36   13.91
  -1  10  -2 2020.46   32.22
   1 -10   2 2116.34   31.59
  -1  10  -3  254.08   12.10
   1 -10   3  274.94   11.94
   1 -10   4  219.84   10.94
  -1  10  -4  210.92   11.31
  -1  10  -5  500.14   17.41
   1 -10   5  500.40   16.51
   1 -10   6   43.53    6.26
  -1  10  -6   45.07    6.80
  -1  10  -7    6.32    5.04
   1 -10   7    7.27    4.25
   1 -10   8  115.09    9.08
   1 -10   8  124.54   13.75
   1 -10   9   13.27    4.83
   1 -10   9   13.86    4.72
   1 -10  10   43.48    7.01
   1 -10  10   25.96   10.09
   1 -10  10   40.24    7.22
   1 -10  11   25.85    6.32
   1 -10  11   24.53    6.11
   1 -10  11   36.90   10.51
   1 -10  12  171.53   16.72
   1 -10  12  165.42   11.79
   1 -10  12  163.67   11.47
   1 -10  13  107.34    9.77
   1 -10  13  103.95    9.93
   1 -10  13   97.31   14.23
   1 -10  14    9.29    5.36
   1 -10  14    3.13    9.61
   1 -10  14   11.10    5.84
   1 -10  15   87.81   13.70
   1 -10  15  107.24   10.46
   1 -10  15  115.84   10.67
   1 -10  16   39.97    7.49
   1 -10  16   29.15    9.77
   1 -10  16   43.74    7.80
   1 -10  17   -7.01    8.65
   1 -10  17   -0.48    5.79
   1 -10  17    8.33    5.41
   1 -10  18   34.03    7.17
   1 -10  18   40.98   11.79
   1 -10  18   42.68    8.33
   1 -10  19   -5.36    6.74
   1 -10  19   -6.21    7.11
   1 -10  20   62.96   10.14
   1 -10  20   51.02    8.60
   1 -10  20   47.99   12.90
   1 -10  21    9.56    6.80
   1 -10  21    6.64    6.00
   1 -10  21    7.70   10.56
   1 -10  22  268.36   17.04
   1 -10  22  276.64   17.41
   1 -10  22  278.07   23.36
   1 -10  23    2.65   11.57
   1 -10  23    1.38    7.54
   1 -10  23   -7.54    7.70
   1 -10  24   28.14    8.44
   1 -10  24   49.11   14.76
   1 -10  24   23.04    8.55
   1 -10  25    9.40    8.65
   1 -10  25   14.60    8.23
   1 -10  26   14.92    9.08
   1 -10  26    1.17    7.64
   1 -10  27   11.73    9.18
   1 -10  27   15.93    9.66
   1 -10  28   39.28   11.25
   1 -10  29   35.89   11.10
   1 -10  30   22.08   10.83
   1 -10  31   12.16   10.09
   1 -10  32   -2.60    9.08
  -1   9  29   13.54    4.78
   1  -9 -29   16.35   13.64
   1  -9 -28   15.40    5.41
  -1   9  28   14.86    4.19
  -1   9  27   10.09    4.03
   1  -9 -27   25.32   13.43
   1  -9 -27   11.84    4.78
   1  -9 -26   20.54    5.10
   1  -9 -26   16.88   11.89
  -1   9  26   17.09    4.62
  -1   9  25   52.13    5.52
   1  -9 -25   50.65   12.63
   1  -9 -25   41.73    5.73
  -1   9  24    6.48    3.82
   1  -9 -24   16.35    4.67
   1  -9 -24   19.96   10.46
  -1   9  23   49.00    5.04
   1  -9 -23   56.38   12.32
   1  -9 -23   47.30    5.52
   1  -9 -22  112.33    7.38
   1  -9 -22  125.23   15.55
  -1   9  22  120.99    7.11
  -1   9  21   25.22    4.19
   1  -9 -21   26.17    4.41
   1  -9 -21   23.15   10.09
   1  -9 -20   64.93    5.63
   1  -9 -20   79.21   12.26
  -1   9  20   64.02    5.47
   1  -9 -19   52.72    5.10
  -1   9  19   50.86    4.94
   1  -9 -19   44.70    9.87
   1  -9 -18    8.18    3.08
  -1   9  18    8.81    3.19
  -1   9  17   50.27    4.88
   1  -9 -17   67.95   10.56
   1  -9 -17   47.04    4.78
  -1   9  16   22.46    3.72
   1  -9 -16   22.77    3.40
   1  -9 -16   23.78    8.07
   1  -9 -15   24.05    3.61
  -1   9  15   17.41    3.34
   1  -9 -15   17.63    7.06
   1  -9 -14   26.12    6.85
  -1   9  14   24.90    3.72
   1  -9 -14   24.10    3.45
   1  -9 -13  398.69   10.67
   1  -9 -13  457.30   20.28
  -1   9  13  409.84   11.36
  -1   9  12   41.04    4.25
   1  -9 -12   37.64    3.93
   1  -9 -12   48.79    8.07
  -1   9  11  571.28   13.17
   1  -9 -11  567.08   12.58
  -1   9  10  143.55    6.95
   1  -9 -10  153.85    6.80
   1  -9 -10  159.10   11.57
   1  -9  -9  577.91   12.85
  -1   9   9  572.87   13.38
   1  -9  -8   63.71    4.78
  -1   9   8   58.29    5.04
   1  -9  -7   35.09    3.82
  -1   9   7   41.62    4.46
  -1   9   6   78.89    5.57
   1  -9  -6   76.98    5.26
   1  -9  -5  369.97   10.78
  -1   9   5  383.88   11.57
  -1   9   4   39.39    4.72
   1  -9  -4   45.87    4.62
  -1   9   3   18.00    4.03
   1  -9  -3   18.63    3.77
  -1   9   2  596.76   15.08
   1  -9  -2  592.35   14.33
  -1   9   1   52.13    5.57
   1  -9  -1   56.01    5.31
   1  -9   0    8.55    3.77
  -1   9   0   11.79    4.14
  -1   9  -1 1208.86   22.62
   1  -9   1 1257.54   22.30
  -1   9  -2   36.42    5.04
   1  -9   2   42.31    5.26
   1  -9   3   87.01    6.69
  -1   9  -3   77.51    7.01
  -1   9  -4  121.25    8.39
   1  -9   4  122.15    8.12
   1  -9   5  180.39    9.56
  -1   9  -5  152.41    9.40
   1  -9   6 1172.44   24.15
  -1   9  -6 1126.20   25.16
   1  -9   7  136.86   14.02
   1  -9   7  115.36    8.39
  -1   9  -7  110.63    8.71
   1  -9   8  260.66   12.48
   1  -9   8  261.51   16.62
   1  -9   9    7.86    7.06
   1  -9   9    5.15    4.67
   1  -9   9    4.25    3.98
   1  -9  10  151.03   14.07
   1  -9  10  140.58    9.77
   1  -9  10  144.66   10.19
   1  -9  11   65.51    7.38
   1  -9  11   67.21    7.33
   1  -9  11   73.05   11.84
   1  -9  12    8.39    4.72
   1  -9  12    5.47    4.25
   1  -9  12   15.61    8.71
   1  -9  13  121.73   14.76
   1  -9  13  107.66    9.50
   1  -9  13  110.85    9.93
   1  -9  14   36.21    6.80
   1  -9  14   38.28    6.85
   1  -9  14   46.77   11.31
   1  -9  15   24.85    6.37
   1  -9  15   16.78    8.60
   1  -9  15   30.42    6.64
   1  -9  16   -1.80    5.15
   1  -9  16   -2.55    5.63
   1  -9  16    1.80    7.91
   1  -9  17  182.67   12.85
   1  -9  17  179.38   17.09
   1  -9  17  157.67   11.47
   1  -9  18   25.00    9.72
   1  -9  18    4.67    6.00
   1  -9  18   16.51    6.21
   1  -9  19   31.91   10.78
   1  -9  19   13.27    5.68
   1  -9  19   21.02    7.06
   1  -9  20   91.15   14.12
   1  -9  20   77.30    9.45
   1  -9  20   75.54    9.61
   1  -9  21   35.62    8.76
   1  -9  21   52.03   13.11
   1  -9  21   47.99    8.92
   1  -9  22    6.90   10.51
   1  -9  22   17.20    7.06
   1  -9  22    3.50    6.53
   1  -9  23   83.03   10.78
   1  -9  23   82.34   11.15
   1  -9  23   84.78   15.66
   1  -9  24   26.54   12.58
   1  -9  24   39.55    9.24
   1  -9  24   20.49    8.02
   1  -9  25   56.49   10.09
   1  -9  25   44.75    9.02
   1  -9  26    3.34    7.22
   1  -9  26    2.65    7.59
   1  -9  27   13.27    8.87
   1  -9  27   -0.37    8.23
   1  -9  28   11.20    9.29
   1  -9  28   16.40    9.82
   1  -9  29   15.82    9.24
   1  -9  30    0.16    9.13
   1  -9  31   16.88   11.41
   1  -9  32   21.82   11.41
   1  -8 -30   49.90   15.93
   1  -8 -29   17.20    5.41
   1  -8 -29    6.37   13.06
  -1   8  29   10.67    4.57
   1  -8 -28    0.69    5.04
  -1   8  28    0.05    3.77
   1  -8 -28    8.97   12.69
  -1   8  27    3.29    3.88
   1  -8 -27   -1.27    4.30
   1  -8 -26   93.43    7.43
  -1   8  26  101.93    6.80
   1  -8 -26  120.51   16.72
  -1   8  25   80.06    6.05
   1  -8 -25   78.94    6.64
   1  -8 -25   81.33   15.34
   1  -8 -24   -1.22   10.25
  -1   8  24    2.76    3.29
   1  -8 -24   -2.12    4.14
   1  -8 -23   74.06   12.53
   1  -8 -23   72.31    6.11
  -1   8  23   71.83    5.63
   1  -8 -22   34.93    4.88
  -1   8  22   28.08    4.14
   1  -8 -22   39.66   10.51
  -1   8  21    2.65    2.92
   1  -8 -21    4.67    3.56
   1  -8 -21   -2.97    8.44
  -1   8  20   82.82    5.68
   1  -8 -20   83.35    6.05
   1  -8 -20   81.01   12.58
   1  -8 -19  155.28   14.76
  -1   8  19  155.87    7.38
   1  -8 -19  164.78    7.75
   1  -8 -18   80.64    5.63
   1  -8 -18   75.54   10.99
  -1   8  18   78.84    5.36
  -1   8  17  269.15    9.13
   1  -8 -17  294.64   18.05
   1  -8 -17  260.45    8.87
  -1   8  16  454.59   11.25
   1  -8 -16  481.56   22.30
   1  -8 -16  456.02   11.52
   1  -8 -15   19.48    6.85
  -1   8  15   13.32    3.03
   1  -8 -15   10.99    3.03
  -1   8  14   28.03    3.56
   1  -8 -14   28.14    3.45
   1  -8 -14   31.22    7.54
  -1   8  13   20.81    3.34
   1  -8 -13   18.47    3.19
  -1   8  12   10.30    2.87
   1  -8 -12    6.74    5.26
   1  -8 -12    8.71    2.50
  -1   8  11   11.41    2.97
   1  -8 -11   14.86    2.92
   1  -8 -11   16.72    5.47
   1  -8 -10  330.26   15.98
   1  -8 -10  320.33    8.97
  -1   8  10  337.11    9.72
   1  -8  -9   86.75    5.10
  -1   8   9   89.56    5.31
  -1   8   8    2.71    2.71
   1  -8  -8    2.92    2.39
  -1   8   7   72.89    5.31
   1  -8  -7   83.03    4.99
  -1   8   6   50.59    4.57
   1  -8  -6   54.57    4.57
   1  -8  -5    7.54    2.71
  -1   8   5    5.73    3.19
   1  -8  -4   30.05    3.82
  -1   8   4   34.98    4.09
   1  -8  -3  296.18    9.50
  -1   8   3  285.82    9.82
  -1   8   2    7.91    3.45
   1  -8  -2    5.10    2.81
  -1   8   1   44.70    4.99
   1  -8  -1   53.25    5.10
   1  -8   0  185.86    8.44
  -1   8   0  174.87    8.65
   1  -8   1 2760.77   31.43
  -1   8  -1 2694.89   32.17
   1  -8   2  467.70   13.54
  -1   8  -2  455.23   13.91
   1  -8   3   10.88    3.82
  -1   8  -3    9.24    4.19
  -1   8  -4    3.72    3.88
   1  -8   4    3.56    3.72
  -1   8  -5   19.54    5.20
   1  -8   5   25.27    5.04
   1  -8   6  452.04   14.55
  -1   8  -6  615.34   18.00
   1  -8   7   11.52    4.51
   1  -8   7    8.97    7.06
   1  -8   8   26.65    7.49
   1  -8   8   33.13    5.20
   1  -8   8   25.11    5.20
   1  -8   9 1337.12   26.54
   1  -8   9 1347.58   27.61
   1  -8  10   21.39    4.83
   1  -8  10   18.05    4.72
   1  -8  10    7.43    7.06
   1  -8  11   65.88    7.22
   1  -8  11   53.19   10.03
   1  -8  11   53.35    6.69
   1  -8  12   31.69    9.34
   1  -8  12   21.98    5.31
   1  -8  12   19.85    5.15
   1  -8  13   80.32   11.73
   1  -8  13   96.25    8.87
   1  -8  13   93.75    8.81
   1  -8  14   15.87    5.79
   1  -8  14   22.56    8.44
   1  -8  14   11.63    5.47
   1  -8  15  234.33   13.43
   1  -8  15  230.93   13.11
   1  -8  16  175.35   12.16
   1  -8  16  176.94   12.00
   1  -8  16  139.62   14.33
   1  -8  17    8.87    5.47
   1  -8  17   18.58    9.40
   1  -8  17    5.63    5.41
   1  -8  18   82.60    8.92
   1  -8  18   95.24    9.93
   1  -8  18   78.78   12.32
   1  -8  19   27.23    6.58
   1  -8  19   23.25    7.06
   1  -8  19   20.07    9.02
   1  -8  20    7.06    6.11
  -1   8 -20    1.80   11.41
   1  -8  20    4.03    5.73
   1  -8  20   10.99    9.24
   1  -8  21    2.55    6.32
  -1   8 -21    4.41   12.37
   1  -8  21    4.51    5.89
   1  -8  21   -3.98    8.76
  -1   8 -22   50.86   15.61
   1  -8  22   43.90    8.12
   1  -8  22   48.15    8.28
   1  -8  22   42.95   12.42
  -1   8 -23  -15.77   14.33
   1  -8  23    0.69    6.11
   1  -8  23    0.74    9.34
   1  -8  23   -2.50    7.06
   1  -8  24   52.08    9.50
   1  -8  24   45.92    8.28
   1  -8  24   39.97   12.74
  -1   8 -24   59.67   17.31
   1  -8  25   53.14   15.13
   1  -8  25   33.18    8.55
   1  -8  25   30.68    8.44
  -1   8 -25   36.84   14.92
  -1   8 -26   -2.28   14.49
   1  -8  26    8.39    6.95
   1  -8  26    4.14    7.64
  -1   8 -27   16.62   15.61
   1  -8  27   37.37    9.61
   1  -8  27   19.01    8.65
  -1   8 -28   39.82   18.79
   1  -8  28   29.73    8.87
   1  -8  28   27.50   10.51
   1  -8  29    3.93    8.76
  -1   8 -29    4.62   17.25
   1  -8  29    8.12    8.33
   1  -8  30   31.85    9.72
   1  -8  30   15.29    9.77
   1  -8  31   56.06   12.05
   1  -8  32   11.41   10.62
   1  -8  33   17.09    9.93
   1  -7 -30    4.78   13.06
   1  -7 -29   15.93    5.63
  -1   7  29    9.02    3.82
   1  -7 -28    3.24    4.83
   1  -7 -28   10.72   12.37
  -1   7  28    3.34    3.77
   1  -7 -27    9.77    4.83
  -1   7  27   16.62    4.41
   1  -7 -27   18.74   12.00
   1  -7 -26   -0.42    4.09
  -1   7  26    7.70    3.72
   1  -7 -26    1.49   10.46
   1  -7 -25    9.50    4.19
  -1   7  25    0.42    3.29
  -1   7  24    7.01    3.66
   1  -7 -24   -5.10    9.40
   1  -7 -24    7.38    4.30
   1  -7 -23   15.66    4.25
   1  -7 -23   10.41    9.66
  -1   7  23    6.90    3.29
   1  -7 -22   21.71    9.98
   1  -7 -22   12.26    3.98
  -1   7  22   14.33    3.40
  -1   7  21  114.30    6.26
   1  -7 -21  111.80    7.01
   1  -7 -21  114.46   14.60
   1  -7 -20   16.78    8.28
  -1   7  20    6.69    3.03
   1  -7 -20    6.32    3.29
  -1   7  19   97.89    5.73
   1  -7 -19   88.55    6.05
   1  -7 -19  109.79   12.95
   1  -7 -18   11.84    6.53
  -1   7  18   14.12    3.24
   1  -7 -18   10.30    3.03
   1  -7 -17   51.07    4.62
   1  -7 -17   62.27    9.98
  -1   7  17   50.49    4.14
  -1   7  16   17.84    2.92
   1  -7 -16   21.18    3.50
  -1   7  15   18.79    2.97
   1  -7 -15   21.02    3.19
   1  -7 -15    7.86    6.11
  -1   7  14   27.18    3.40
   1  -7 -14   31.22    7.75
   1  -7 -14   27.76    3.50
  -1   7  13   49.27    4.19
   1  -7 -13   47.62    4.09
   1  -7 -13   45.66    8.76
  -1   7  12  602.39   11.94
   1  -7 -12  581.68   11.41
   1  -7 -12  602.44   22.35
   1  -7 -11  475.45   10.25
   1  -7 -11  461.54   18.74
  -1   7  11  489.47   10.78
   1  -7 -10   39.02    3.50
  -1   7  10   36.21    3.50
   1  -7 -10   31.37    6.53
   1  -7  -9   41.51    3.61
   1  -7  -9   48.63    7.70
  -1   7   9   45.34    4.19
  -1   7   8  278.98    8.23
   1  -7  -8  264.69    7.91
  -1   7   7   91.10    5.15
   1  -7  -7   87.70    4.88
   1  -7  -6  220.10    7.49
  -1   7   6  229.92    8.18
   1  -7  -5   21.24    3.08
  -1   7   5   12.00    2.92
   1  -7  -4   10.46    3.56
  -1   7   4   11.73    3.93
   1  -7  -3 2442.14   25.80
  -1   7   3 2589.40   26.44
  -1   7   2  609.92   14.02
   1  -7  -2  616.24   13.38
  -1   7   1 3313.09   32.01
   1  -7  -1 3222.42   30.95
  -1   7   0  686.21   15.66
   1  -7   0  711.91   15.02
   1  -7   1   92.74    6.16
  -1   7  -1   84.30    6.37
   1  -7   2  463.35   12.74
  -1   7  -2  430.43   12.90
   1  -7   3 1041.15   20.17
  -1   7  -3 1068.81   20.97
  -1   7  -4  690.46   17.84
   1  -7   4  733.88   17.20
   1  -7   5  115.89    7.59
  -1   7  -5   99.38    8.02
   1  -7   6  105.80   12.32
   1  -7   6  130.75    8.39
  -1   7  -6  110.32    8.44
   1  -7   7   64.50    6.69
   1  -7   7   63.44    6.48
   1  -7   8  391.57   14.39
   1  -7   8  395.98   14.17
   1  -7   9  428.26   15.13
   1  -7   9  378.20   19.75
   1  -7   9  409.84   14.49
   1  -7  10   90.30    7.64
   1  -7  10   82.82    7.54
   1  -7  11  292.57   13.32
   1  -7  11  277.38   17.78
   1  -7  11  297.29   13.17
   1  -7  12   11.57    4.51
   1  -7  12   11.31    4.51
   1  -7  12    6.37    6.90
   1  -7  13  377.03   15.40
   1  -7  13  393.64   16.03
   1  -7  14  162.55   10.94
   1  -7  14  140.42   13.01
   1  -7  14  144.29   10.14
   1  -7  15   -2.65    4.14
  -1   7 -15   -4.57    8.60
   1  -7  15    9.40    4.94
   1  -7  15   -4.51    7.06
   1  -7  16    3.40    4.62
  -1   7 -16    8.33    8.23
   1  -7  16    8.92    5.26
   1  -7  16   -6.90    6.95
   1  -7  17   22.56    8.71
   1  -7  17   26.81    6.00
   1  -7  17   23.04    6.11
   1  -7  18   79.26    8.60
   1  -7  18   60.63   10.83
   1  -7  18   73.37    8.60
   1  -7  19   75.76    8.71
  -1   7 -19   57.07   12.69
   1  -7  19   87.86    9.72
   1  -7  19   74.38   12.53
   1  -7  20  115.62   10.88
  -1   7 -20  122.05   16.03
   1  -7  20  117.85   10.35
   1  -7  20  101.08   14.12
   1  -7  21   19.11    7.17
   1  -7  21   21.50    6.48
  -1   7 -21   16.09   10.46
   1  -7  21   43.27   12.05
   1  -7  22   73.37    9.77
   1  -7  22   84.89   13.59
   1  -7  22   77.24    9.13
   1  -7  23    0.11    5.84
   1  -7  23    3.08    6.37
  -1   7 -23   -9.56   11.73
   1  -7  23   -2.50    8.92
   1  -7  24   27.61    7.96
   1  -7  24   27.45    7.54
  -1   7 -24    3.88   10.67
   1  -7  24   27.39   11.68
   1  -7  25    6.21   10.67
   1  -7  25    0.64    7.33
  -1   7 -25  -20.39   12.95
   1  -7  25   -1.75    6.26
  -1   7 -26   -1.33   12.10
   1  -7  26   22.99   12.95
   1  -7  26   24.90    7.96
   1  -7  26   30.58    9.18
   1  -7  27   97.73   11.36
   1  -7  27  105.54   12.74
  -1   7 -27  106.71   18.79
  -1   7 -28  -16.24   15.77
   1  -7  28    6.37    8.39
   1  -7  28    9.87    8.12
  -1   7 -29  -14.60   15.50
   1  -7  29    7.54    8.12
   1  -7  29   10.51    7.43
   1  -7  30   25.43    9.24
   1  -7  30   -5.04    9.08
   1  -7  31   90.25   12.32
   1  -7  31   67.32   12.85
   1  -7  32   37.27   11.57
   1  -7  33    3.50    9.82
   1  -7  34   46.35   12.48
  -1   6  30    9.50    5.68
   1  -6 -30   16.40   14.17
  -1   6  30   13.06    4.25
   1  -6 -29   14.55   12.00
  -1   6  29    5.15    4.03
   1  -6 -28   -8.28   10.67
  -1   6  28    4.62    3.77
   1  -6 -27   69.49    7.01
   1  -6 -27   91.15   15.98
  -1   6  27  107.45   16.24
  -1   6  27   82.87    6.32
   1  -6 -26   39.28    6.05
  -1   6  26   28.30   10.72
  -1   6  26   38.59    4.83
   1  -6 -26   24.90   11.68
   1  -6 -25    1.17    9.29
   1  -6 -25    5.36    4.41
  -1   6  25    2.39    3.24
  -1   6  25   -0.58    8.07
  -1   6  24   12.32    3.77
  -1   6  24   10.14    8.65
   1  -6 -24   20.70    9.72
   1  -6 -24   11.04    4.30
   1  -6 -23  256.04   10.51
  -1   6  23  269.63    9.50
  -1   6  23  282.48   20.33
   1  -6 -23  249.41   20.92
   1  -6 -22    5.15    3.66
  -1   6  22   10.35    7.06
   1  -6 -22   17.73    9.34
  -1   6  22    0.21    2.81
   1  -6 -21  314.17   10.72
  -1   6  21  324.47   19.59
   1  -6 -21  308.49   20.70
  -1   6  21  343.48    9.98
  -1   6  20   78.73   11.25
   1  -6 -20   88.18    6.00
   1  -6 -20   94.81   12.79
  -1   6  20   94.34    5.52
  -1   6  19   -1.96    6.90
  -1   6  19    1.33    2.44
   1  -6 -19   -0.53    2.81
   1  -6 -19    0.00    7.33
  -1   6  18   60.57    4.46
   1  -6 -18   43.00    8.76
   1  -6 -18   62.86    4.99
   1  -6 -17   -3.40    6.16
   1  -6 -17   -2.28    2.65
  -1   6  17    1.96    2.28
   1  -6 -16    3.13    5.36
  -1   6  16   -0.96    2.02
   1  -6 -16    0.21    2.34
  -1   6  15  732.77   12.48
   1  -6 -15  721.25   13.27
  -1   6  14   66.31    4.30
   1  -6 -14   61.37    9.02
   1  -6 -14   63.02    4.35
   1  -6 -13  101.29    5.10
   1  -6 -13   93.43    9.61
  -1   6  13  102.72    4.99
  -1   6  12  428.31    9.24
   1  -6 -12  415.62    9.24
  -1   6  11   38.49    3.19
   1  -6 -11   35.36    3.08
   1  -6 -11   36.37    6.85
  -1   6  10   59.19    3.88
   1  -6 -10   47.78    6.74
   1  -6 -10   54.73    3.72
   1  -6  -9   66.84    7.80
   1  -6  -9   61.05    3.82
  -1   6   9   61.05    4.03
  -1   6   8  344.64    8.55
   1  -6  -8  359.83    8.23
   1  -6  -8  316.24   14.49
  -1   6   7 1062.55   14.44
   1  -6  -7 1056.34   14.07
   1  -6  -6   19.22    3.08
  -1   6   6   22.83    3.45
   1  -6  -5  958.60   13.96
  -1   6   5 1012.17   14.86
  -1   6   4   62.43    4.83
   1  -6  -4   56.11    4.25
   1  -6  -3 2184.77   22.08
  -1   6   3 2203.24   22.99
  -1   6   2 1935.04   21.61
   1  -6  -2 1870.22   20.60
   1  -6  -1 5384.46   36.74
  -1   6   1 5589.91   37.53
   1  -6   0 2258.61   24.42
  -1   6   0 2181.74   24.63
   1  -6   1 1615.40   21.39
  -1   6  -1 1562.85   21.45
  -1   6  -2   22.30    4.51
   1  -6   2   21.02    4.14
   1  -6   3 3219.55   31.80
  -1   6  -3 3182.71   33.39
   1  -6   4  249.56   10.03
  -1   6  -4  185.12    9.66
   1  -6   5 1316.84   22.24
  -1   6  -5 1422.75   23.84
   1  -6   6 1685.85   25.85
   1  -6   6 1916.46   36.90
   1  -6   7   -1.49    5.31
   1  -6   7   -1.70    3.40
   1  -6   7    2.02    3.24
   1  -6   8  413.71   13.91
   1  -6   8  421.14   14.07
   1  -6   8  401.77   18.37
   1  -6   9  702.83   18.21
   1  -6   9  744.45   18.74
   1  -6  10  410.26   14.39
   1  -6  10  381.28   19.38
   1  -6  10  407.71   14.55
   1  -6  11    2.87    6.00
   1  -6  11   10.19    4.46
   1  -6  11    7.70    4.25
   1  -6  12   53.83    8.65
   1  -6  12   41.25    5.63
  -1   6 -12   35.25    8.18
   1  -6  12   53.25    6.64
   1  -6  13    2.87    4.35
   1  -6  13    1.91    3.66
  -1   6 -13   -6.05    6.69
   1  -6  13   -1.65    5.52
  -1   6 -14   -1.59    6.32
   1  -6  14    5.26    4.72
   1  -6  14   14.12    4.72
   1  -6  14    7.80    5.89
   1  -6  15    7.22    5.10
   1  -6  15   10.67    6.69
   1  -6  15    9.72    4.41
  -1   6 -15   -2.87    7.38
  -1   6 -16    6.05    6.95
   1  -6  16   10.14    4.99
   1  -6  16    2.28    6.48
   1  -6  16   14.07    4.99
  -1   6 -17   17.36    7.27
   1  -6  17    8.55    3.93
   1  -6  17   20.12    5.63
   1  -6  17    4.57    6.85
   1  -6  18    6.85    4.41
   1  -6  18   14.86    5.68
   1  -6  18   16.03    8.33
   1  -6  19  347.99   15.66
   1  -6  19  360.36   21.61
   1  -6  19  332.12   16.40
   1  -6  20   -3.88    8.39
   1  -6  20    1.01    4.83
  -1   6 -20    9.34    9.61
   1  -6  20    1.59    5.63
   1  -6  21  249.51   13.86
   1  -6  21  248.98   19.54
   1  -6  21  240.33   14.81
   1  -6  22   20.39    7.01
   1  -6  22    8.02    5.41
   1  -6  22   19.54    9.50
   1  -6  23   56.22    9.13
   1  -6  23   57.02    8.33
   1  -6  23   66.94   13.80
  -1   6 -23   38.01   11.36
   1  -6  24   28.72    8.02
  -1   6 -24   12.26   11.52
   1  -6  24    8.12   10.35
   1  -6  24    9.02    6.37
  -1   6 -25    0.48   12.21
   1  -6  25    2.71    6.26
   1  -6  25   -5.63   11.36
   1  -6  25    7.01    6.80
   1  -6  26   45.18    8.87
   1  -6  26   46.24    9.40
   1  -6  26   19.85   11.20
  -1   6 -26   36.42   14.76
   1  -6  27   10.72    7.22
   1  -6  27   12.26    7.11
  -1   6 -28   42.05   15.66
   1  -6  28   38.28    9.87
   1  -6  28   41.30    9.24
  -1   6 -29   -4.35   14.23
   1  -6  29    4.78    6.95
   1  -6  29   -2.81    8.97
   1  -6  30    9.40    8.39
   1  -6  30   20.81    8.33
   1  -6  31    0.69    8.65
   1  -6  31    6.11    7.80
   1  -6  32    7.11    9.45
   1  -6  32   15.18    8.81
   1  -6  33   66.20   12.85
   1  -6  34   28.35   12.42
   1  -5 -31    6.26   13.96
  -1   5  30   11.68    6.37
   1  -5 -30   26.17   13.54
  -1   5  30   -3.93    4.09
  -1   5  29    9.34    5.84
  -1   5  29    9.13    4.03
   1  -5 -29   13.01   12.58
   1  -5 -28    3.56   10.25
  -1   5  28    4.67    3.72
  -1   5  27   13.70    4.14
   1  -5 -27   24.21   11.31
  -1   5  27    9.77   10.88
  -1   5  26   59.99   12.79
  -1   5  26   46.66    5.10
   1  -5 -26   39.66   12.58
   1  -5 -26   38.22    5.57
  -1   5  25   -8.97    9.24
  -1   5  25    3.24    3.24
   1  -5 -25    0.69    9.02
   1  -5 -25    2.65    4.41
  -1   5  24   40.67    4.46
   1  -5 -24   35.25    5.26
   1  -5 -24   27.45    9.77
  -1   5  24   34.40   10.46
   1  -5 -23    5.04    8.07
  -1   5  23    9.40    3.08
  -1   5  23    5.84    7.38
   1  -5 -23   12.10    4.30
   1  -5 -22    5.20    7.54
  -1   5  22    7.80    3.08
   1  -5 -22   11.47    4.03
  -1   5  22    7.64    7.38
   1  -5 -21   26.70    4.14
  -1   5  21   28.24    8.49
   1  -5 -21   24.26    8.92
  -1   5  21   28.72    3.66
   1  -5 -20  385.84   22.08
   1  -5 -20  404.10   11.68
  -1   5  20  362.11   20.12
  -1   5  20  403.15   10.19
  -1   5  19    9.72    6.80
   1  -5 -19    5.68    3.13
  -1   5  19    5.68    2.55
   1  -5 -19   18.95    8.23
   1  -5 -18   96.35   11.04
  -1   5  18  115.15   11.79
   1  -5 -18  126.88    6.53
  -1   5  18  122.05    5.52
  -1   5  17   15.45    2.60
  -1   5  17   16.67    5.84
   1  -5 -17   14.97    3.03
   1  -5 -17   15.77    7.11
   1  -5 -16  468.13   10.88
   1  -5 -16  459.63   20.54
  -1   5  16  464.41    9.87
  -1   5  16  449.97   19.64
  -1   5  15  105.38    4.78
  -1   5  15  107.29   10.25
   1  -5 -15  112.01    5.36
   1  -5 -15  116.16   10.99
  -1   5  14  200.41    6.26
  -1   5  14  201.36   12.74
   1  -5 -14  209.80   13.43
   1  -5 -14  197.91    6.64
  -1   5  13   14.60    2.34
   1  -5 -13   15.61    2.44
  -1   5  13   19.64    5.68
   1  -5 -13   16.67    5.52
   1  -5 -12    9.93    2.23
   1  -5 -12   15.82    5.68
  -1   5  12   11.73    2.18
   1  -5 -11  505.23   18.10
  -1   5  11  495.15    8.81
   1  -5 -11  511.87    9.34
   1  -5 -10   75.65    7.64
  -1   5  10   73.63    3.61
   1  -5 -10   78.68    3.77
   1  -5  -9   93.27    7.75
  -1   5   9   93.59    4.03
   1  -5  -9   96.09    4.03
   1  -5  -8  126.67    8.55
   1  -5  -8  146.79    4.67
  -1   5   8  144.98    4.83
   1  -5  -7   92.53    3.72
  -1   5   7   93.38    3.93
   1  -5  -7   97.84    7.75
   1  -5  -6  515.53    8.49
  -1   5   6  375.65    7.75
   1  -5  -5 4014.80   24.26
  -1   5   5 3992.93   25.00
   1  -5  -4 3460.41   22.88
  -1   5   4 3435.03   23.68
  -1   5   3   32.65    3.29
   1  -5  -3   43.05    3.40
   1  -5  -2  961.89   13.43
  -1   5   2 1008.98   13.80
   1  -5  -1 5155.29   31.69
  -1   5   1 5103.68   32.22
   1  -5   0 1412.66   17.52
  -1   5   0 1401.46   17.68
   1  -5   1  495.20   10.99
  -1   5  -1  500.56   11.04
   1  -5   2 5412.76   36.90
  -1   5  -2 5395.35   38.17
   1  -5   3 1190.17   18.26
  -1   5  -3 1184.49   18.69
  -1   5  -4  282.64    9.66
   1  -5   4  270.53    9.34
   1  -5   5 2283.46   37.69
   1  -5   5 1856.10   24.26
   1  -5   6  354.84   11.47
   1  -5   6  345.60   11.31
   1  -5   6  342.63   14.39
   1  -5   7  770.94   17.41
   1  -5   7  760.75   16.93
   1  -5   8 4761.64   43.64
   1  -5   8 4665.29   42.31
   1  -5   8 4870.63   57.49
   1  -5   9   13.80    4.51
   1  -5   9   13.75    6.26
   1  -5   9    4.35    3.45
  -1   5  -9    1.54    6.11
   1  -5  10  232.47   14.60
   1  -5  10  204.39    9.87
   1  -5  10  214.42   10.46
  -1   5 -10  211.45   14.39
   1  -5  11  387.27   14.12
   1  -5  11  380.05   13.06
   1  -5  11  404.79   17.78
   1  -5  12    7.80    4.78
   1  -5  12    1.91    3.45
   1  -5  12   -4.88    6.00
   1  -5  13  236.72   11.25
   1  -5  13  227.91   11.73
   1  -5  13  248.13   14.97
   1  -5  14   20.54    4.67
   1  -5  14   13.01    4.83
  -1   5 -14    4.19    5.84
   1  -5  14   26.81    7.11
  -1   5 -15   50.33    9.72
   1  -5  15   73.15    9.82
   1  -5  15   66.31    7.38
   1  -5  15   65.67    6.74
   1  -5  16  280.57   12.85
   1  -5  16  304.72   18.05
   1  -5  16  295.11   14.12
  -1   5 -16  273.93   17.73
   1  -5  17    3.40    4.88
   1  -5  17   14.02    6.85
   1  -5  17   10.25    4.41
   1  -5  18   60.79    7.06
   1  -5  18   63.71    8.18
   1  -5  18   60.79    9.72
  -1   5 -18   61.90   11.47
   1  -5  19   26.97    5.63
   1  -5  19   21.93    6.05
   1  -5  19   19.01    7.86
  -1   5 -20  191.59   17.52
   1  -5  20  202.16   11.94
   1  -5  20  172.38   15.98
   1  -5  20  181.77   12.32
  -1   5 -21    6.90   10.19
   1  -5  21   -0.69    6.05
   1  -5  21    6.37    4.72
   1  -5  21   13.43    9.18
   1  -5  22   14.02    7.11
   1  -5  22   15.13    8.76
   1  -5  22    6.05    5.04
  -1   5 -22   -0.05    9.82
   1  -5  23  116.05   10.51
   1  -5  23  126.40   16.24
   1  -5  23  113.18   10.94
   1  -5  24  236.93   20.86
   1  -5  24  254.18   15.82
  -1   5 -24  241.02   22.08
   1  -5  24  235.76   14.07
   1  -5  25   49.74   12.63
  -1   5 -25   60.52   14.39
   1  -5  25   63.49    9.40
   1  -5  25   43.37    7.43
  -1   5 -26   86.00   16.78
   1  -5  26   53.83    8.49
   1  -5  26   68.01   10.67
   1  -5  26   52.88   13.48
   1  -5  27   13.38    7.64
   1  -5  27   21.50   11.73
   1  -5  27   24.79    7.49
   1  -5  28    6.64    7.75
   1  -5  28    8.39    6.32
  -1   5 -29   56.86   16.56
   1  -5  29   26.17    7.86
   1  -5  29   37.85    9.93
  -1   5 -30    8.07   14.71
   1  -5  30    6.42    8.81
   1  -5  30   -1.70    7.01
   1  -5  31   24.15   10.25
   1  -5  31    4.99    7.11
   1  -5  32   45.50   10.99
   1  -5  32   48.15    9.50
   1  -5  33   74.64   13.70
   1  -5  34  175.30   17.15
  -1   4  31   57.33    7.86
   1  -4 -31   64.98   16.51
  -1   4  30    1.54    6.05
   1  -4 -30   -8.87   12.63
  -1   4  30   -3.66    4.03
  -1   4  29   18.26    4.67
  -1   4  29    8.76    5.57
  -1   4  28   -3.50    3.88
  -1   4  28    1.75    5.36
  -1   4  27   -0.05    3.40
  -1   4  27   -1.80    9.02
   1  -4 -27    6.53    9.72
  -1   4  26   22.03    9.34
  -1   4  26   31.59    4.41
   1  -4 -26   19.01    9.93
   1  -4 -25   87.91   13.75
  -1   4  25   94.76   13.54
  -1   4  25  102.14    6.53
   1  -4 -25  108.09    8.18
   1  -4 -24    2.44    4.03
  -1   4  24    4.88    8.12
  -1   4  24    2.12    2.97
   1  -4 -24  -10.83   10.03
   1  -4 -23   68.80    6.32
  -1   4  23   81.44   12.32
   1  -4 -23   71.83   12.10
  -1   4  23   77.14    5.41
   1  -4 -22    0.80    8.12
  -1   4  22    4.25    2.87
  -1   4  22   10.25    8.07
   1  -4 -22    9.40    4.14
  -1   4  21   63.33    4.99
   1  -4 -21   60.04    5.79
   1  -4 -21   55.48   10.88
   1  -4 -20  133.62   13.38
  -1   4  20  111.91   12.05
  -1   4  20  129.53    6.37
   1  -4 -20  136.06    7.38
  -1   4  19   21.34    7.06
  -1   4  19   16.72    3.13
   1  -4 -19   10.94    7.54
   1  -4 -19   18.10    3.72
  -1   4  18    5.89    2.55
   1  -4 -18    3.08    6.32
  -1   4  18   14.71    6.64
   1  -4 -18    3.88    2.87
   1  -4 -17   54.95    8.28
   1  -4 -17   55.05    4.46
  -1   4  17   52.45    8.49
  -1   4  17   57.81    3.98
  -1   4  16   51.18    3.66
  -1   4  16   43.27    6.90
   1  -4 -16   56.75    4.25
   1  -4 -16   50.27    8.18
   1  -4 -15   34.08    6.69
  -1   4  15   20.49    5.95
   1  -4 -15   28.93    3.34
  -1   4  15   29.94    2.87
   1  -4 -14  293.47    7.91
  -1   4  14  273.67   14.33
   1  -4 -14  298.67   15.55
  -1   4  14  284.28    7.11
   1  -4 -13    9.08    5.36
  -1   4  13    6.90    1.86
   1  -4 -13    3.93    2.07
  -1   4  13    5.84    4.78
   1  -4 -12  153.58   10.46
  -1   4  12  147.96    4.83
   1  -4 -12  143.44    5.15
  -1   4  12  141.74   10.25
   1  -4 -11  380.32    7.75
  -1   4  11  372.25   14.86
  -1   4  11  369.22    7.22
   1  -4 -11  366.73   14.97
  -1   4  10   41.67    5.95
  -1   4  10   35.62    2.60
   1  -4 -10   36.79    2.71
   1  -4 -10   42.68    6.32
  -1   4   9   11.94    1.80
   1  -4  -9   15.24    4.83
   1  -4  -9   10.25    1.80
  -1   4   8  983.66   10.56
   1  -4  -8  936.78   10.30
   1  -4  -8  988.92   21.55
   1  -4  -7  362.75    6.42
  -1   4   7  375.17    6.64
   1  -4  -6 3066.71   34.56
   1  -4  -6 3051.74   17.78
  -1   4   6 3033.37   18.21
   1  -4  -5 1358.78   12.05
  -1   4   5 1373.06   12.53
  -1   4   4  164.15    4.83
   1  -4  -4  178.37    4.62
  -1   4   3  280.78    6.26
   1  -4  -3  283.97    6.05
  -1   4   2  190.80    5.52
   1  -4  -2  186.18    5.36
   1  -4  -1  118.39    4.72
  -1   4   1  122.21    4.83
   1  -4   0   16.67    2.81
  -1   4   0   16.62    2.81
  -1   4  -1   21.66    3.45
   1  -4   1   22.99    3.40
  -1   4  -2  339.87    9.08
   1  -4   2  312.21    8.33
   1  -4   3    1.49    2.76
  -1   4  -3    2.87    2.92
   1  -4   4   69.23    4.99
   1  -4   4   71.35    4.94
   1  -4   5  203.17    8.02
   1  -4   5  212.72    8.28
   1  -4   5  209.06   10.78
   1  -4   6  579.61   17.63
   1  -4   6  528.97   12.79
   1  -4   6  540.38   13.32
  -1   4  -7  110.85    9.87
   1  -4   7   90.99    6.21
   1  -4   7   92.21    8.49
   1  -4   7  103.20    6.42
   1  -4   8   47.99    7.59
  -1   4  -8   39.71    6.80
   1  -4   8   32.12    4.41
   1  -4   8   24.26    4.09
  -1   4  -9  313.69   14.71
   1  -4   9  289.70   10.46
   1  -4   9  304.35   14.28
   1  -4   9  301.54   11.10
   1  -4  10   18.00    5.20
   1  -4  10   20.01    4.19
   1  -4  10   17.15    4.57
  -1   4 -10   13.01    5.26
   1  -4  11  611.57   16.67
   1  -4  11  568.52   15.24
   1  -4  11  628.24   21.02
  -1   4 -11  631.64   22.51
   1  -4  12  332.81   16.03
   1  -4  12  319.06   12.58
   1  -4  12  311.15   11.63
  -1   4 -12  339.97   17.36
  -1   4 -13  131.50   12.37
   1  -4  13  135.37   11.47
   1  -4  13  108.25    7.38
   1  -4  13  119.92    8.39
  -1   4 -14  474.76   21.87
   1  -4  14  453.05   14.39
   1  -4  14  494.19   20.49
   1  -4  14  452.84   15.77
  -1   4 -15  189.52   15.24
   1  -4  15  201.10   11.20
   1  -4  15  195.79    9.93
   1  -4  15  210.76   14.33
   1  -4  16   48.63    8.23
   1  -4  16   44.70    6.64
  -1   4 -16   46.50    9.87
   1  -4  16   47.19    5.95
   1  -4  17   -0.16    4.67
   1  -4  17    8.71    6.48
   1  -4  17   -0.58    3.61
  -1   4 -17    7.49    7.49
   1  -4  18  313.38   18.63
   1  -4  18  314.76   14.97
  -1   4 -18  289.91   19.85
   1  -4  18  321.87   13.38
   1  -4  19    7.38    7.91
   1  -4  19   -6.74    5.68
   1  -4  19   -0.21    3.88
   1  -4  20  117.11   10.62
   1  -4  20  120.24   13.48
   1  -4  20  104.64    8.71
   1  -4  21  420.93   24.10
   1  -4  21  401.82   18.00
   1  -4  21  394.55   16.14
  -1   4 -21  431.87   25.22
   1  -4  22  916.66   35.30
   1  -4  22  911.99   24.21
   1  -4  22  947.99   27.45
  -1   4 -22  907.32   36.84
   1  -4  23    0.32    6.16
   1  -4  23   19.38   10.30
   1  -4  23    5.15    5.31
   1  -4  24   35.36    6.48
   1  -4  24   38.01    8.44
  -1   4 -24   22.88   12.37
   1  -4  24   20.23   10.25
  -1   4 -25    4.88   11.25
   1  -4  25    9.08    8.97
   1  -4  25    3.13    5.04
   1  -4  25    3.19    7.06
   1  -4  26   51.60    8.12
   1  -4  26   57.28    9.82
   1  -4  26   49.69   11.63
   1  -4  27   19.43    6.69
   1  -4  27    2.81   10.51
   1  -4  27    3.93    6.90
  -1   4 -27    1.54   12.16
   1  -4  28   24.47    8.28
  -1   4 -28   20.65   14.28
   1  -4  28   30.26    7.49
  -1   4 -29    3.82   14.17
   1  -4  29   20.07    6.69
   1  -4  29   25.06    9.13
   1  -4  30   21.50    9.29
   1  -4  30    0.80    6.48
  -1   4 -30   18.26   16.40
   1  -4  31  -12.32    8.97
   1  -4  31    5.47    6.53
  -1   4 -31   -1.86   16.56
   1  -4  32   46.93    9.24
   1  -4  32   40.35   11.25
   1  -4  33   29.73   10.78
   1  -4  33   24.21    8.49
   1  -4  34    8.71    9.72
  -1   3  31   47.25    7.80
   1  -3 -31   34.51   14.17
  -1   3  31   49.74    6.74
   1  -3 -30   54.15   15.71
  -1   3  30   60.89    6.58
  -1   3  30   48.15    6.90
   1  -3 -29  104.10   16.51
  -1   3  29  130.44   10.25
  -1   3  29  118.49    7.96
   1  -3 -28    2.87   10.03
  -1   3  28    5.95    6.21
  -1   3  28    1.91    3.72
  -1   3  27   18.21    4.35
  -1   3  27   17.57   10.09
   1  -3 -27   28.72   11.89
  -1   3  27   17.68    6.11
  -1   3  26    3.40    3.34
  -1   3  26    7.70    5.57
   1  -3 -26  -13.48   10.78
  -1   3  26    9.34    9.24
  -1   3  25   28.61    4.41
  -1   3  25   29.52   10.88
   1  -3 -25   21.24   10.14
  -1   3  24    9.40    3.45
   1  -3 -24    2.12    8.55
  -1   3  24   -5.84    7.96
  -1   3  23    3.24    3.24
   1  -3 -23    8.76    8.92
  -1   3  23    5.36    7.64
   1  -3 -23    5.47    3.88
  -1   3  22    5.84    3.08
   1  -3 -22    5.26    7.38
   1  -3 -22    5.31    3.61
  -1   3  22    3.24    7.22
  -1   3  21    7.38    2.87
   1  -3 -21   21.98    9.02
   1  -3 -21   10.94    4.03
  -1   3  21   10.25    7.59
  -1   3  20   -2.39    6.95
   1  -3 -20    4.83    3.29
  -1   3  20    4.62    2.65
   1  -3 -20    1.75    7.17
  -1   3  19  185.70    7.11
   1  -3 -19  192.44    8.60
   1  -3 -19  156.34   13.86
  -1   3  18   38.75    7.64
  -1   3  18   48.79    3.93
   1  -3 -18   49.90    4.88
   1  -3 -18   43.32    8.71
  -1   3  17   19.22    2.76
  -1   3  17   16.30    6.00
   1  -3 -17   20.60    3.40
   1  -3 -17   17.57    6.85
  -1   3  16  200.57    6.53
   1  -3 -16  183.47   14.02
   1  -3 -16  194.73    7.43
   1  -3 -15  548.98   21.82
  -1   3  15  545.90   10.14
   1  -3 -15  527.53   11.41
   1  -3 -14  846.11   13.70
  -1   3  14  839.53   12.26
   1  -3 -14  845.79   25.22
  -1   3  13   34.14    3.08
   1  -3 -13   29.78    3.34
  -1   3  13   38.28    6.90
   1  -3 -13   28.88    6.53
  -1   3  12  167.07    4.99
   1  -3 -12  168.50    5.63
  -1   3  12  143.44    9.82
   1  -3 -12  142.96   10.19
   1  -3 -11   65.62    3.66
  -1   3  11   60.15    6.80
  -1   3  11   70.29    3.24
   1  -3 -11   72.73    7.59
   1  -3 -10  446.52   15.45
  -1   3  10  505.55    7.64
  -1   3  10  452.57   15.13
   1  -3 -10  511.50    8.49
  -1   3   9   63.86    6.16
   1  -3  -9   73.31    3.24
   1  -3  -9   57.55    6.42
  -1   3   9   70.77    2.92
  -1   3   8 1062.07   20.86
   1  -3  -8 1006.81    9.93
   1  -3  -8 1007.13   21.08
  -1   3   8 1076.14    9.93
   1  -3  -7  914.43   19.01
  -1   3   7  939.44   19.16
   1  -3  -7  978.46    9.18
   1  -3  -6  749.97    7.64
   1  -3  -6  711.64   16.19
  -1   3   6  735.90    7.70
   1  -3  -5  347.03   11.20
  -1   3   5  395.50    5.79
   1  -3  -5  381.06    5.47
  -1   3   4  437.39    6.42
   1  -3  -4  396.35    6.00
   1  -3  -3 1439.63   11.04
  -1   3   3 1501.00   11.79
  -1   3   2 1999.70   14.55
   1  -3  -2 1965.52   14.28
   1  -3  -1 3214.24   19.48
  -1   3   1 3245.72   20.23
   1  -3   0 5319.38   27.45
  -1   3   0 5342.00   27.82
  -1   3  -1  772.74   11.57
   1  -3   1  766.16   11.25
   1  -3   2 5206.62   31.06
   1  -3   3  150.13    6.32
   1  -3   3  141.80    6.16
   1  -3   4   80.69    7.64
   1  -3   4  105.70    5.84
   1  -3   4  104.58    5.68
   1  -3   5  285.13   12.26
   1  -3   5  366.89    9.93
   1  -3   6 2476.64   25.43
  -1   3  -6 2453.18   25.48
   1  -3   7  351.55   14.33
   1  -3   7  403.25   10.88
  -1   3  -7  407.29   11.20
  -1   3  -7  392.48   14.28
  -1   3  -8  133.67    9.98
  -1   3  -8  112.49    6.69
   1  -3   8  112.44    6.64
   1  -3   8  115.52    8.60
   1  -3   9   26.44    5.57
  -1   3  -9   32.60    4.62
  -1   3  -9   29.46    6.74
   1  -3   9   26.07    3.98
  -1   3 -10  853.28   24.00
   1  -3  10  894.15   22.88
  -1   3 -10  872.28   18.10
   1  -3  10  839.63   16.99
  -1   3 -11   18.32    3.93
   1  -3  11   19.59    3.72
  -1   3 -11   20.28    6.90
   1  -3  11   20.28    5.63
   1  -3  12  313.43   11.20
  -1   3 -12  347.51   18.00
   1  -3  12  330.31   15.61
  -1   3 -12  313.69   11.94
  -1   3 -13  223.82   15.24
   1  -3  13  216.12   13.38
   1  -3  13  226.05    9.93
  -1   3 -13  224.99   10.56
   1  -3  14   -1.59    3.34
  -1   3 -14   10.46    8.23
   1  -3  14   -2.12    5.47
  -1   3 -14   -1.33    3.45
   1  -3  15   76.76    9.40
  -1   3 -15   74.69    6.95
   1  -3  15   75.17    6.42
  -1   3 -15   70.66   10.41
   1  -3  16   18.32    4.46
  -1   3 -16   16.19    7.43
   1  -3  16   32.49    8.65
   1  -3  17   33.87    7.06
  -1   3 -17   39.92    9.56
   1  -3  17   33.07    4.99
   1  -3  18  200.25   10.56
  -1   3 -18  188.57   16.72
   1  -3  18  225.99   16.24
   1  -3  19   10.99    7.59
  -1   3 -19   11.25    9.40
   1  -3  19    6.74    4.30
   1  -3  20   20.33    8.33
   1  -3  20   15.66    6.32
   1  -3  20   10.99    4.57
   1  -3  21   -2.76    4.57
   1  -3  21   -0.21    7.43
   1  -3  21    0.16    5.31
  -1   3 -21   -0.96    9.02
   1  -3  22  101.66   13.17
   1  -3  22   97.68    8.55
   1  -3  22  103.36   10.14
  -1   3 -22  128.42   16.51
   1  -3  23   87.75   13.22
  -1   3 -23   61.69   14.49
   1  -3  23   95.13   10.19
   1  -3  23   98.64    8.71
   1  -3  24    3.08    6.00
   1  -3  24    5.68    5.15
   1  -3  24  -10.35    9.98
   1  -3  25  167.70   17.73
   1  -3  25  194.57   12.32
   1  -3  25  179.97   13.70
   1  -3  26   10.19    7.06
   1  -3  26    1.70    4.94
   1  -3  26   -7.11    9.98
   1  -3  27  191.86   12.58
   1  -3  27  196.64   14.60
   1  -3  27  197.17   20.49
  -1   3 -27  185.75   21.45
   1  -3  28   46.98    7.70
   1  -3  28   82.18   16.03
  -1   3 -28   41.20   14.86
   1  -3  28   70.82   10.67
   1  -3  29    2.50    7.43
  -1   3 -29    1.70   13.27
   1  -3  29    7.54    6.11
   1  -3  30   -2.65    8.23
   1  -3  30   12.32    6.58
  -1   3 -30  -14.39   15.77
  -1   3 -31  208.74   27.55
   1  -3  31  185.22   15.82
   1  -3  31  170.36   12.95
   1  -3  32    1.75    8.12
   1  -3  32  -14.71    8.28
   1  -3  33   -7.38    7.49
   1  -3  33    3.34    8.92
   1  -3  34   26.01   10.56
  -1   2  31   14.97    5.15
  -1   2  31   10.99    6.42
  -1   2  30   12.79    4.99
   1  -2 -30    7.49   12.26
  -1   2  30   -7.43    6.58
  -1   2  29   -1.80    4.35
  -1   2  29    6.80    5.95
  -1   2  28   40.40    7.11
   1  -2 -28   21.08   12.79
  -1   2  28   38.28    5.41
  -1   2  27  120.19    9.98
  -1   2  27  103.52   16.24
  -1   2  27  124.60    7.86
   1  -2 -27  103.63   16.09
  -1   2  26    3.56    5.31
  -1   2  26    2.44    9.02
  -1   2  26    3.98    3.72
   1  -2 -26   10.83   10.03
  -1   2  25   -0.96    3.19
  -1   2  25   10.88    9.93
  -1   2  25    0.80    4.72
   1  -2 -25   -3.93    9.77
  -1   2  24   83.14   12.79
  -1   2  24   92.80    6.48
  -1   2  24   95.08    8.12
   1  -2 -24   82.23   13.86
  -1   2  23   15.34    3.72
   1  -2 -23   24.79    9.93
  -1   2  23   22.93    8.87
   1  -2 -22   17.84    9.24
  -1   2  22   -0.16    3.08
  -1   2  22   11.63    8.23
   1  -2 -21   24.74    9.34
  -1   2  21   38.49    9.77
   1  -2 -21   31.85    4.72
  -1   2  21   32.70    4.19
   1  -2 -20   10.41    7.17
  -1   2  20    1.75    6.58
   1  -2 -20    5.15    3.50
  -1   2  20    6.16    2.92
  -1   2  19   17.15    3.13
  -1   2  19    8.28    6.26
   1  -2 -19   16.40    3.93
   1  -2 -19   20.44    7.38
   1  -2 -18  177.58   14.28
  -1   2  18  206.19    7.49
   1  -2 -18  208.74    8.97
  -1   2  18  213.09   15.13
  -1   2  17  177.15   13.75
  -1   2  17  187.29    6.95
   1  -2 -17  177.68   14.12
   1  -2 -17  189.95    8.23
  -1   2  16   35.25    7.70
   1  -2 -16   22.62    3.72
   1  -2 -16   19.11    6.90
  -1   2  16   24.85    3.29
   1  -2 -15  648.57   13.32
  -1   2  15  620.75   11.41
  -1   2  15  623.41   22.35
   1  -2 -14  305.04   15.93
  -1   2  14  359.14   16.46
   1  -2 -14  310.88    8.81
  -1   2  14  330.74    8.07
  -1   2  13   32.91    2.81
   1  -2 -13   32.12    3.29
   1  -2 -13   28.88    6.16
  -1   2  13   34.61    7.01
   1  -2 -12   57.87    3.72
  -1   2  12   55.37    7.11
  -1   2  12   57.02    3.34
   1  -2 -12   51.28    7.27
  -1   2  11    9.50    1.96
   1  -2 -11   11.25    4.78
   1  -2 -11    8.02    2.18
  -1   2  11   11.79    4.78
   1  -2 -10  402.46   15.18
   1  -2 -10  405.54    7.96
  -1   2  10  404.10    7.17
  -1   2  10  408.67   15.45
   1  -2  -9 1971.14   15.55
  -1   2   9 2018.23   30.05
   1  -2  -9 1900.86   30.10
  -1   2   9 2010.06   14.33
  -1   2   8 2618.07   32.91
  -1   2   8 2663.25   14.86
   1  -2  -8 2620.78   16.30
   1  -2  -7  839.85    8.55
   1  -2  -7  879.93   18.21
  -1   2   7  885.24    8.07
  -1   2   6  705.59    6.48
   1  -2  -6  691.57   15.24
  -1   2   6  714.93   15.34
   1  -2  -6  690.72    6.64
  -1   2   5  688.60   13.80
   1  -2  -5  597.87   13.32
   1  -2  -4    4.14    3.03
   1  -2  -3   64.50    4.30
   1  -2  -1  312.58    5.10
  -1   2   1  335.51    5.41
   1  -2   0  608.07    7.96
   1  -2   1   21.55    2.23
  -1   2  -2  322.03    7.11
   1  -2   2  470.52    8.18
   1  -2   3  392.85    8.07
  -1   2  -3  389.56    8.28
  -1   2  -4  175.14    6.11
   1  -2   4  176.57    6.11
  -1   2  -4  176.62    8.18
   1  -2   5  774.34   17.57
   1  -2   5  958.60   13.91
  -1   2  -5  828.70   17.09
  -1   2  -5  977.87   14.44
   1  -2   6   42.36    3.82
   1  -2   6   40.29    5.52
  -1   2  -6   54.73    4.46
  -1   2  -6   37.21    5.63
  -1   2  -7    9.18    2.81
  -1   2  -7   13.32    5.10
   1  -2   7   10.46    2.87
   1  -2   7    4.09    3.82
   1  -2   8  591.87   16.62
  -1   2  -8  613.11   13.32
   1  -2   8  639.39   12.85
  -1   2  -8  622.03   18.74
  -1   2  -9 2547.04   27.61
  -1   2  -9 2558.03   38.33
  -1   2 -10  783.31   22.19
  -1   2 -10  786.65   16.30
   1  -2  10  787.77   15.45
   1  -2  10  811.55   21.13
  -1   2 -11   89.72    9.29
   1  -2  11   69.07    5.41
  -1   2 -11   76.98    6.26
   1  -2  11   85.47    8.65
  -1   2 -12  608.44   21.34
   1  -2  12  603.23   20.01
  -1   2 -12  606.10   15.45
   1  -2  12  610.40   14.28
  -1   2 -13  125.07    8.02
  -1   2 -13  110.16   10.83
   1  -2  13  122.95   10.46
   1  -2  13  119.92    6.90
  -1   2 -14  293.57   11.73
   1  -2  14  298.25   10.88
  -1   2 -14  297.34   16.46
   1  -2  14  257.85   14.12
   1  -2  15   28.88    6.85
  -1   2 -15   11.79    6.21
   1  -2  15   18.63    4.03
  -1   2 -15   20.28    4.72
   1  -2  16    5.89    6.00
  -1   2 -16   -2.39    6.05
   1  -2  16    4.30    3.50
  -1   2 -16    3.93    3.45
  -1   2 -17   34.56    5.63
   1  -2  17   34.35    5.10
   1  -2  17   26.70    7.22
  -1   2 -18  148.80    9.93
   1  -2  18  149.71    9.02
  -1   2 -18  155.12   14.76
   1  -2  18  146.20   13.01
   1  -2  19   12.05    6.74
  -1   2 -19   17.94    8.02
  -1   2 -19   12.37    4.57
   1  -2  19   17.04    4.25
  -1   2 -20  151.25   10.51
   1  -2  20  157.19   14.60
  -1   2 -20  133.46   14.71
   1  -2  20  162.02    9.61
  -1   2 -21   31.64   10.72
   1  -2  21   30.68    8.76
   1  -2  21   36.79    5.89
  -1   2 -22   37.69   12.05
   1  -2  22   33.39    6.11
   1  -2  22   34.51    9.61
   1  -2  23   13.75    5.04
   1  -2  23   12.74    8.49
  -1   2 -23   18.53   11.68
   1  -2  24  247.71   12.69
   1  -2  24  247.92   19.80
  -1   2 -24  261.30   23.36
   1  -2  24  251.00   15.13
   1  -2  25    2.34    6.48
   1  -2  25    7.70    5.10
   1  -2  25   18.21    9.93
  -1   2 -26  342.57   27.55
   1  -2  26  360.89   18.42
   1  -2  26  350.27   15.18
   1  -2  26  337.74   23.94
   1  -2  27   57.23    7.70
  -1   2 -27   75.07   17.04
   1  -2  27   44.17    8.81
   1  -2  27   43.64   12.95
   1  -2  28   44.81    9.34
  -1   2 -28   29.09   13.54
   1  -2  28   51.02   14.17
   1  -2  28   39.50    7.49
   1  -2  29   26.97    6.21
   1  -2  29   43.05    9.56
  -1   2 -29   41.67   17.84
   1  -2  30  105.80   10.19
  -1   2 -30  114.78   22.67
   1  -2  30  120.24   12.63
   1  -2  31  170.68   14.97
  -1   2 -31  128.21   22.93
   1  -2  31  140.68   11.63
   1  -2  32   18.00    7.86
   1  -2  32  -19.59    9.24
   1  -2  33    1.06    8.49
   1  -2  33   -0.53    7.01
   1  -2  34   16.88    9.56
  -1   1  31    9.08    6.85
   1  -1 -31   10.41   13.22
  -1   1  31    2.97    4.72
  -1   1  30   22.62    7.01
  -1   1  30   13.01    4.99
  -1   1  29   39.07    5.89
   1  -1 -29   30.37   12.00
  -1   1  29   36.74    7.17
  -1   1  28   21.82    4.78
  -1   1  28   21.13    6.11
   1  -1 -28   22.46   11.25
  -1   1  27   20.49    6.16
  -1   1  27   15.61    4.88
  -1   1  27   27.55   11.31
   1  -1 -27   16.93   10.67
  -1   1  26    7.64    5.57
   1  -1 -26   -0.11    9.45
  -1   1  26    3.03    9.29
  -1   1  26    1.01    3.82
  -1   1  25    8.18    3.77
  -1   1  25   14.17    5.84
  -1   1  25   11.31    8.76
   1  -1 -25   13.01    9.82
  -1   1  24    4.19    8.87
   1  -1 -24    6.90    8.44
  -1   1  24    5.15    3.77
  -1   1  24    8.87    5.31
  -1   1  23   27.82    4.57
  -1   1  23   27.76    9.82
  -1   1  23   21.34    5.57
   1  -1 -23   18.10    9.08
  -1   1  22   49.05    5.26
  -1   1  22   45.34    9.82
   1  -1 -22   41.57   10.56
  -1   1  22   50.33    6.21
  -1   1  21  131.07   13.75
  -1   1  21  164.47    7.91
   1  -1 -21  148.96   14.92
   1  -1 -20   -6.00    7.17
  -1   1  20    4.67    3.03
  -1   1  20    4.35    7.38
  -1   1  19   10.56    3.08
  -1   1  19    3.72    5.95
   1  -1 -19    7.01    6.58
  -1   1  18    5.63    2.71
  -1   1  18    4.62    5.89
   1  -1 -18    4.35    3.34
   1  -1 -18    5.52    5.84
   1  -1 -17    2.02    2.97
  -1   1  17    5.68    2.65
   1  -1 -17    3.93    5.57
  -1   1  17   -0.58    5.79
   1  -1 -16  246.54   15.66
   1  -1 -16  265.28    9.82
  -1   1  16  273.35   15.50
  -1   1  16  281.63    8.44
  -1   1  15  296.87   15.71
   1  -1 -15  332.28   10.25
  -1   1  15  337.00    8.81
   1  -1 -15  275.68   15.55
  -1   1  14   46.66    7.38
   1  -1 -14   46.03    7.43
   1  -1 -14   39.18    4.25
  -1   1  14   41.89    3.40
   1  -1 -13  337.69    9.45
   1  -1 -13  333.39   15.40
  -1   1  13  343.37    8.18
  -1   1  13  330.47   15.18
  -1   1  12   61.26    7.54
  -1   1  12   60.31    3.61
   1  -1 -12   61.48    7.49
   1  -1 -12   57.76    4.19
  -1   1  11  127.46    9.18
   1  -1 -11  128.63    9.66
   1  -1 -11  140.05    5.68
  -1   1  11  147.11    4.99
  -1   1  10   27.92    5.20
   1  -1 -10   32.33    2.97
  -1   1  10   28.35    2.50
   1  -1 -10   28.19    5.31
  -1   1   9 1991.90   29.89
  -1   1   9 2094.47   15.61
   1  -1  -9 1998.70   30.95
   1  -1  -8  376.07    6.74
  -1   1   8  358.50   12.32
   1  -1  -8  355.10   12.42
  -1   1   7  530.56    6.64
   1  -1  -7  550.25    7.49
  -1   1   7  466.75   13.48
   1  -1  -7  440.47   12.90
  -1   1   6 3024.88   13.64
   1  -1  -6 3032.58   30.79
   1  -1  -6 2944.93   14.86
  -1   1   6 3081.36   30.68
  -1   1   5  552.27   12.32
   1  -1  -5  522.54   11.94
   1  -1  -4 2184.71   21.87
  -1   1   4 2209.88   21.87
   1  -1  -3   18.79    2.76
  -1   1   3   24.79    3.19
   1  -1  -2 2413.04   17.78
   1  -1   1  119.77    3.19
  -1   1  -1  116.16    3.19
  -1   1  -2 1853.02   13.32
   1  -1   2 1891.30   13.38
  -1   1  -3   89.24    4.62
   1  -1   3   89.40    3.56
   1  -1   3   96.57    5.10
   1  -1   4 3684.60   28.83
  -1   1  -4 3836.06   31.22
   1  -1   4 3769.01   22.77
  -1   1  -4 3789.29   22.93
   1  -1   5   41.78    4.88
   1  -1   5   38.54    3.34
  -1   1  -5   38.38    3.24
  -1   1  -5   43.69    5.26
   1  -1   6 1067.06   13.86
  -1   1  -6 1073.06   14.23
   1  -1   6 1057.88   17.84
  -1   1  -6 1015.30   18.32
   1  -1   7  103.31    7.01
   1  -1   7  123.59    5.52
  -1   1  -7  126.77    7.70
  -1   1  -7  130.44    5.73
   1  -1   8  878.02   13.91
  -1   1  -8  855.67   14.33
   1  -1   8  899.68   18.90
  -1   1  -8  897.76   18.90
   1  -1   9 1247.13   23.52
   1  -1   9 1163.52   16.72
  -1   1  -9 1276.12   23.89
  -1   1  -9 1172.28   17.73
   1  -1  10  477.10   11.31
  -1   1 -10  492.12   12.21
   1  -1  10  525.30   16.30
  -1   1 -10  542.45   16.67
  -1   1 -11   25.91    3.82
   1  -1  11   24.69    5.20
   1  -1  11   28.56    3.88
  -1   1 -11   30.42    5.52
  -1   1 -12    3.40    4.78
   1  -1  12    4.62    4.57
  -1   1 -12    5.15    3.19
   1  -1  12    6.80    3.08
   1  -1  13   24.85    3.88
   1  -1  13   23.36    6.85
  -1   1 -13   18.95    5.52
  -1   1 -13   23.73    4.09
   1  -1  14  581.10   14.33
  -1   1 -14  583.65   20.76
  -1   1 -14  609.61   15.77
   1  -1  14  632.22   21.77
  -1   1 -15   40.40    5.36
   1  -1  15   32.17    4.41
   1  -1  15   33.71    6.80
  -1   1 -15   22.99    5.79
   1  -1  16  102.09    9.82
   1  -1  16  105.06    6.90
  -1   1 -16  106.07    7.75
  -1   1 -16  108.88   10.67
   1  -1  17   40.35    7.01
  -1   1 -17   39.02    7.96
  -1   1 -17   42.63    5.63
   1  -1  17   46.19    5.20
   1  -1  18   44.91    5.41
   1  -1  18   38.81    8.44
  -1   1 -18   36.95    8.33
  -1   1 -18   46.61    6.32
   1  -1  19  151.19    8.55
  -1   1 -19  135.48   13.11
   1  -1  19  149.55   13.17
  -1   1 -19  154.48   10.03
  -1   1 -20   16.24    7.01
  -1   1 -20   26.01    5.63
   1  -1  20   34.29    8.49
   1  -1  20   20.60    4.41
  -1   1 -21   11.15    8.39
   1  -1  21   -3.19    7.17
  -1   1 -21    2.81    4.51
   1  -1  21    4.67    4.19
   1  -1  22   18.69    8.39
  -1   1 -22    6.53    7.75
   1  -1  22    4.67    4.09
  -1   1 -22   -0.74    4.88
  -1   1 -23  261.72   13.91
  -1   1 -23  290.76   21.02
   1  -1  23  261.30   12.00
   1  -1  23  292.30   20.07
   1  -1  24   -0.74    3.98
   1  -1  24    3.29    7.59
  -1   1 -24   10.62   10.14
   1  -1  25   63.97    7.06
   1  -1  25   94.76   14.65
  -1   1 -25   72.68   13.70
  -1   1 -26   72.78   14.81
   1  -1  26   64.34    7.27
   1  -1  26   69.17   13.17
   1  -1  26   66.84    9.24
   1  -1  27  222.86   12.48
  -1   1 -27  220.15   22.72
   1  -1  27  227.64   15.08
   1  -1  27  239.21   20.65
   1  -1  28    8.87    7.80
   1  -1  28   34.93   12.63
  -1   1 -28   16.62   13.32
   1  -1  28   18.21    6.05
   1  -1  29    5.15    5.15
   1  -1  29   -2.97    8.07
   1  -1  30   76.07   10.99
  -1   1 -30   43.53   15.98
   1  -1  30   65.88    9.02
   1  -1  31   85.21   11.94
   1  -1  31   90.99   10.30
   1  -1  32   17.94    6.74
   1  -1  32   33.45    9.98
  -1   1 -32   34.77   18.21
   1  -1  33   30.74    8.39
   1  -1  33    3.98    8.39
   1  -1  34   10.83   10.03
  -1   0  31    4.25    5.04
   1   0 -31   15.02   15.08
  -1   0  31   -2.87    6.37
  -1   0  30    2.97    6.37
   1   0 -30   -9.08   12.69
  -1   0  30    5.57    5.10
  -1   0  29    9.61    4.88
   1   0 -29    6.58   12.16
  -1   0  29   19.11    6.48
   1   0 -28   -7.75   11.25
  -1   0  28   -4.09    5.95
  -1   0  28    2.23    4.88
  -1   0  27   11.15    6.05
  -1   0  27   -1.65    3.98
  -1   0  27   -4.94   11.04
   1   0 -27    2.87    9.56
   1   0 -26    1.86    9.50
  -1   0  26    1.65    3.88
  -1   0  26   -4.25   10.72
  -1   0  26    2.55    5.04
  -1   0  25   -1.17    4.99
  -1   0  25   -2.34    3.98
   1   0 -25    1.43    9.40
  -1   0  25    9.50    9.45
   1   0 -24   -3.24    9.61
  -1   0  24   -1.38    4.83
  -1   0  24   -0.58    3.72
  -1   0  24    2.55    8.02
  -1   0  23    4.99    7.75
  -1   0  23    0.11    4.46
  -1   0  23    2.39    3.40
   1   0 -23    1.54    8.12
  -1   0  22    8.18    3.40
   1   0 -22   14.33    9.18
  -1   0  22    3.50    4.62
  -1   0  22    5.31    7.96
  -1   0  21    2.71    6.95
  -1   0  21   -3.98    4.46
  -1   0  21   -1.22    3.24
   1   0 -21    1.65    7.33
   1   0 -20    0.27    6.90
  -1   0  20    1.01    3.88
  -1   0  20    5.89    3.19
  -1   0  20    7.06    7.64
  -1   0  19    0.48    5.84
  -1   0  19   -4.03    4.09
  -1   0  19    2.97    3.03
   1   0 -19   -0.21    6.11
  -1   0  18    7.27    2.81
  -1   0  18   -1.22    5.95
   1   0 -18    4.83    6.58
  -1   0  18    6.05    3.98
   1   0 -17    7.43    6.16
  -1   0  17    2.07    2.55
  -1   0  17    5.57    5.63
   1   0 -16    3.29    5.68
  -1   0  16    8.23    2.60
  -1   0  16    3.56    4.72
   1   0 -15   12.53    6.05
  -1   0  15    6.74    4.99
  -1   0  15   15.29    2.92
  -1   0  14    6.32    2.50
   1   0 -14    8.28    5.26
  -1   0  14    3.50    5.10
   1   0 -13   -2.28    4.99
  -1   0  13    1.33    2.28
  -1   0  13   -1.38    4.41
   1   0 -12   40.13    6.74
  -1   0  12   39.82    3.50
   1   0 -12   44.49    3.98
  -1   0  12   36.68    6.48
   1   0 -11   17.57    2.97
   1   0 -11   19.22    5.15
  -1   0  11   19.85    5.31
  -1   0  11   14.33    2.55
  -1   0  10    4.72    2.02
   1   0 -10    4.83    2.39
   1   0 -10   -0.11    4.19
  -1   0  10    5.57    4.30
  -1   0   9  314.97   12.79
   1   0  -9  374.69    8.44
   1   0  -9  305.63   12.48
  -1   0   9  358.13    7.49
   1   0  -8    9.77    4.41
  -1   0   8   10.03    2.12
  -1   0   8    4.72    4.03
  -1   0   7    8.81    1.75
   1   0  -7    9.13    3.72
  -1   0   7    7.06    3.82
  -1   0   6   24.85    4.19
  -1   0   6   32.65    2.23
   1   0  -6   25.27    4.03
  -1   0   5   20.23    2.12
   1   0  -5   16.78    3.72
  -1   0   5   23.20    3.98
  -1   0   5   23.78    1.96
  -1   0   4   10.14    3.08
   1   0  -4   18.63    3.29
   1   0  -3    0.48    1.96
  -1   0   3    3.08    2.02
   1   0  -2    1.49    1.27
  -1   0   2    0.96    1.38
  -1   0  -1   11.36    1.01
   1   0   1   13.22    1.11
   1   0   2    0.05    0.90
  -1   0  -2    0.37    0.90
   1   0   3    7.86    1.86
   1   0   3   10.03    1.49
  -1   0  -3    9.34    1.80
  -1   0  -3   11.20    1.65
   1   0   4   -0.37    1.54
   1   0   4    0.05    2.39
  -1   0  -4    1.06    1.59
  -1   0  -4    0.00    2.18
   1   0   5    6.53    3.50
  -1   0  -5    6.64    3.45
  -1   0  -5    4.83    2.18
   1   0   5    0.11    1.96
   1   0   6   28.35    4.09
  -1   0  -6   32.70    3.08
  -1   0  -6   26.49    4.14
   1   0   6   34.14    3.08
  -1   0  -7   54.84    3.77
   1   0   7   58.71    3.82
   1   0   7   55.58    5.36
  -1   0  -7   51.60    5.20
  -1   0  -8   79.58    6.58
   1   0   8   98.58    4.72
  -1   0  -8   93.75    4.94
   1   0   8   80.06    6.48
   1   0   9    1.59    2.18
   1   0   9    0.37    3.77
  -1   0  -9    3.82    4.30
  -1   0  -9   -0.74    2.34
  -1   0 -10   37.16    5.89
  -1   0 -10   51.23    4.19
   1   0  10   42.95    5.84
  -1   0 -11   28.19    5.89
   1   0  11   28.30    6.05
  -1   0 -11   21.82    3.45
   1   0  11   22.40    3.34
  -1   0 -12  117.54    9.34
   1   0  12  116.21    9.34
  -1   0 -12  125.98    6.64
   1   0  12  137.50    6.53
  -1   0 -13   25.54    3.98
  -1   0 -13   39.23    6.80
   1   0  13   29.36    3.88
   1   0  13   23.25    5.79
   1   0  14    0.85    4.35
   1   0  14    7.38    2.97
  -1   0 -14    2.23    4.67
  -1   0 -14    5.26    3.13
  -1   0 -15   -0.21    4.72
  -1   0 -15   -2.07    3.29
   1   0  15    1.06    2.55
   1   0  15   -1.70    4.78
   1   0  16   -0.90    5.47
   1   0  16    2.07    2.87
  -1   0 -16   -0.69    3.08
  -1   0 -16   -6.32    5.95
   1   0  17   19.85    6.37
  -1   0 -17   19.22    4.41
  -1   0 -17   21.08    6.37
   1   0  17   21.13    3.98
  -1   0 -18   -1.70    5.73
   1   0  18    5.63    3.19
  -1   0 -18    3.50    3.66
   1   0  18   -3.03    5.57
   1   0  19   12.42    6.32
  -1   0 -19   18.79    7.22
  -1   0 -19   20.86    4.99
   1   0  19   23.89    4.62
   1   0  20   27.76    4.62
  -1   0 -20   16.56    7.54
   1   0  20   25.27    8.18
  -1   0 -20   24.74    4.99
  -1   0 -21   17.09    4.99
  -1   0 -21    8.28    7.11
   1   0  21    5.79    6.53
   1   0  21    6.16    3.40
  -1   0 -22    7.70    8.39
   1   0  22    3.88    7.38
  -1   0 -22   -1.17    4.72
   1   0  22    7.22    3.98
   1   0  23   44.70   10.09
  -1   0 -23   68.32    7.96
   1   0  23   64.77    6.58
  -1   0 -23   47.57   10.99
   1   0  24   20.76    5.10
  -1   0 -24   20.97    5.73
   1   0  24    9.82    8.81
  -1   0 -24    0.64    8.87
   1   0  25   -1.22    9.13
   1   0  25   -1.59    4.46
  -1   0 -25   -5.89    9.87
  -1   0 -25    1.38    5.10
   1   0  26    3.03    8.81
  -1   0 -26    0.85   10.19
   1   0  26   13.17    5.31
   1   0  27   -5.31    9.98
  -1   0 -27   -3.56   10.19
   1   0  27   -1.65    4.83
   1   0  28  -10.35   10.99
   1   0  28    4.25    7.22
  -1   0 -28   13.43   12.00
   1   0  28    1.91    5.04
  -1   0 -29   10.51   14.49
   1   0  29    1.27    5.20
   1   0  29    3.19    6.80
   1   0  30   12.48    8.23
  -1   0 -30   -0.58   13.32
   1   0  30   20.76    6.69
  -1   0 -31    1.96   14.28
   1   0  31    7.59    6.58
   1   0  31   -2.65    8.12
  -1   0 -32    8.12   16.24
   1   0  32   -2.60    8.33
   1   0  32   -4.03    5.84
   1   0  33    7.96    8.97
   1   0  33   -1.49    6.74
   1   0  34   29.68   10.99
  -1  -1  32   25.54    8.87
  -1  -1  31   -6.58    6.64
   1   1 -31   10.88   16.35
  -1  -1  31    8.07    5.47
  -1  -1  30    4.78    6.64
  -1  -1  30   -2.07    4.94
   1   1 -29   29.04   13.32
  -1  -1  29   15.02    5.52
  -1  -1  29   11.52    6.37
  -1  -1  28   32.44    6.21
  -1  -1  28   27.82    7.01
   1   1 -28   44.54   14.60
  -1  -1  27   10.94    5.73
  -1  -1  27   20.44   11.04
   1   1 -27   15.29   11.41
  -1  -1  27   20.33    5.31
  -1  -1  26    8.87    9.18
   1   1 -26    4.03    9.93
  -1  -1  26   -0.69    4.03
  -1  -1  26    5.52    5.68
   1   1 -25   -5.41   10.99
  -1  -1  25    3.08    5.15
  -1  -1  25   12.63    9.72
  -1  -1  25    4.83    4.19
   1   1 -24    2.50    8.71
  -1  -1  24   13.59    4.30
  -1  -1  24   17.15    5.31
  -1  -1  24   28.08   10.19
  -1  -1  23    8.39    5.10
  -1  -1  23    4.62    8.02
  -1  -1  23    0.32    3.66
  -1  -1  22    2.97    4.72
   1   1 -22   -0.85    7.59
  -1  -1  22    7.59    8.12
  -1  -1  22    3.24    3.45
  -1  -1  21   84.25   11.57
  -1  -1  21   92.37    7.06
   1   1 -21   82.02   11.94
  -1  -1  21   84.46    7.86
  -1  -1  20   16.78    7.17
  -1  -1  20   19.06    5.36
   1   1 -20   25.69    8.87
  -1  -1  20   11.04    3.77
  -1  -1  19    9.56    3.45
  -1  -1  19   11.41    4.57
   1   1 -19   11.84    6.69
  -1  -1  19   10.88    7.01
  -1  -1  18   -3.34    2.92
  -1  -1  18   -4.19    5.89
   1   1 -18    2.34    6.90
  -1  -1  18    0.69    3.72
  -1  -1  17   28.24    4.19
  -1  -1  17   34.83    5.20
  -1  -1  17   26.12    7.49
  -1  -1  16  198.60    8.49
  -1  -1  16  202.79    9.34
   1   1 -16  197.65   13.80
  -1  -1  16  204.71   13.80
   1   1 -15   44.06    8.02
  -1  -1  15   35.36    7.22
  -1  -1  15   27.61    3.88
  -1  -1  15   28.45    4.25
  -1  -1  14  287.42   14.92
  -1  -1  14  300.05    9.45
  -1  -1  14  319.64   10.78
   1   1 -14  281.58   15.55
   1   1 -13  372.73   16.51
  -1  -1  13  368.80   10.03
  -1  -1  13  376.55   11.25
  -1  -1  13  388.34   16.40
  -1  -1  12   20.81    3.72
  -1  -1  12   16.09    2.97
  -1  -1  12   26.86    5.84
  -1  -1  11   52.50    4.57
  -1  -1  11   59.25    4.41
   1   1 -11   56.91    7.11
  -1  -1  11   61.58    7.11
  -1  -1  10   99.49    8.28
   1   1 -10   88.07    7.70
  -1  -1  10   99.75    5.36
  -1  -1  10   92.05    4.83
   1   1  -9 1271.40   24.69
  -1  -1   9 1286.68   15.77
  -1  -1   9 1310.84   17.09
  -1  -1   8  111.06    4.78
  -1  -1   8  127.20    5.47
  -1  -1   8  145.35    8.76
   1   1  -8  122.15    8.07
   1   1  -7   42.79    5.63
  -1  -1   7   32.86    5.20
  -1  -1   7   33.66    3.19
  -1  -1   7   35.14    3.45
  -1  -1   6 3737.37   33.82
   1   1  -6 3688.85   34.45
  -1  -1   6 3726.86   23.25
  -1  -1   6 3671.59   22.56
  -1  -1   5  710.68   14.12
  -1  -1   5  660.25    9.24
   1   1  -5  697.31   14.07
   1   1  -4 1926.97   21.08
  -1  -1   4 1872.24   13.75
   1   1  -4 1929.26   14.81
  -1  -1   4 1937.33   20.97
  -1  -1   3  408.93    8.87
  -1  -1   3  422.74    6.05
   1   1  -3  411.32    6.16
   1   1  -3  404.37    8.87
  -1  -1   2 4154.69   23.25
   1   1  -2 4091.99   23.31
  -1  -1   1    1.17    0.80
   1   1  -1    1.91    0.96
  -1  -1   0 2847.46   13.43
   1   1   0 2560.20   12.58
  -1  -1  -1  333.34    4.78
   1   1   1  344.43    4.67
  -1  -1  -2 2856.49   14.71
   1   1   2 2154.51   12.85
   1   1   3   12.90    1.54
  -1  -1  -3   12.85    1.59
   1   1   3   14.71    2.02
  -1  -1  -3   12.85    1.91
   1   1   4 3907.89   20.23
  -1  -1  -4 3800.65   19.96
  -1  -1  -4 3791.84   24.53
   1   1   4 3931.51   24.90
  -1  -1  -5  108.67    5.57
   1   1   5  100.65    3.98
  -1  -1  -5  101.34    3.93
   1   1   5  107.61    5.52
   1   1   6  533.21    8.65
  -1  -1  -6  508.74    8.81
   1   1   6  553.76   12.16
  -1  -1  -6  586.83   12.90
  -1  -1  -7   46.66    3.45
   1   1   7   46.13    3.45
  -1  -1  -7   54.31    5.52
   1   1   7   44.54    5.20
  -1  -1  -8 1005.11   19.06
   1   1   8 1071.26   19.54
  -1  -1  -8 1062.60   14.55
   1   1   8 1042.64   13.48
   1   1   9 1211.46   22.19
  -1  -1  -9 1221.71   16.24
   1   1   9 1192.98   15.08
  -1  -1  -9 1130.82   21.93
  -1  -1 -10 1502.91   26.60
   1   1  10 1528.98   26.38
  -1  -1 -10 1610.04   19.38
   1   1  10 1563.17   18.10
   1   1  11   12.00    4.67
  -1  -1 -11   19.01    5.26
   1   1  11   10.56    2.76
  -1  -1 -11   11.41    2.87
   1   1  12   28.19    3.34
  -1  -1 -12   24.26    3.72
   1   1  12   32.76    5.73
  -1  -1 -12   26.12    6.16
   1   1  13    6.74    2.76
   1   1  13    7.49    4.72
  -1  -1 -13    0.16    4.57
  -1  -1 -13    5.79    2.92
  -1  -1 -14 1015.73   18.47
   1   1  14  960.36   25.27
  -1  -1 -14  968.27   26.01
   1   1  14 1001.39   16.99
   1   1  15   39.34    6.90
  -1  -1 -15   47.57    7.86
  -1  -1 -15   44.86    4.88
   1   1  15   43.11    4.25
  -1  -1 -16   90.99   10.03
  -1  -1 -16  103.73    6.85
   1   1  16   94.87    6.05
   1   1  16  102.57    9.93
  -1  -1 -17   27.76    4.67
   1   1  17   30.53    4.09
  -1  -1 -17   26.38    7.06
   1   1  17   26.81    7.06
   1   1  18   44.01    4.83
  -1  -1 -18   32.76    7.75
  -1  -1 -18   43.16    5.47
   1   1  18   33.76    7.54
   1   1  19   10.88    3.29
  -1  -1 -19   23.41    7.96
   1   1  19   15.82    6.16
  -1  -1 -19   13.01    4.14
  -1  -1 -20   15.50    4.35
   1   1  20   18.74    4.14
  -1  -1 -20   15.66    6.90
   1   1  20   23.46    8.49
   1   1  21   72.25    6.48
  -1  -1 -21   68.11    6.95
  -1  -1 -21   66.84   11.04
   1   1  21   59.03    9.87
   1   1  22    2.02    3.61
  -1  -1 -22    1.49    4.41
   1   1  22    6.74    6.85
  -1  -1 -22   15.08    8.65
  -1  -1 -23  576.16   19.27
   1   1  23  537.78   25.91
   1   1  23  573.98   16.93
  -1  -1 -23  509.48   26.44
  -1  -1 -24   10.94    5.10
   1   1  24    9.13    4.25
   1   1  24   11.20    8.02
  -1  -1 -24    3.13    8.49
   1   1  25  126.51    8.92
   1   1  25  130.12   16.03
  -1  -1 -25  104.00   14.44
  -1  -1 -25  144.35   11.15
   1   1  26   35.41   11.20
   1   1  26   21.98    5.36
  -1  -1 -26   11.73    9.66
  -1  -1 -26   30.63    6.74
   1   1  27  300.53   13.59
   1   1  27  275.84   22.14
  -1  -1 -27  302.23   15.77
   1   1  28   60.41    7.33
  -1  -1 -28   54.73   14.33
   1   1  28   39.60   12.16
   1   1  29   -1.91    5.10
  -1  -1 -29    1.86   11.20
   1   1  30   36.05    8.76
   1   1  30   32.60    6.37
  -1  -1 -30   31.69   13.75
   1   1  31  209.22   12.42
   1   1  31  219.68   16.03
  -1  -1 -31  209.96   24.21
   1   1  32   66.47    8.60
   1   1  32   69.49   11.36
   1   1  33   69.70    9.13
   1   1  33   84.09   12.37
  -1  -2  32   -2.18    7.11
  -1  -2  31    9.02    5.84
  -1  -2  31   -4.46    6.85
  -1  -2  30   -3.08    5.26
  -1  -2  30   15.82    7.22
   1   2 -30    3.08   13.96
  -1  -2  29   18.32    5.89
  -1  -2  29   17.89    7.33
   1   2 -29   14.02   15.98
  -1  -2  28    3.66    4.67
   1   2 -28   20.01   14.55
  -1  -2  28    2.28    6.11
  -1  -2  27    9.08    9.77
   1   2 -27   13.70   13.80
  -1  -2  27   -1.59    6.21
  -1  -2  27   -0.42    4.62
  -1  -2  26  112.17    8.71
   1   2 -26   77.14   15.08
  -1  -2  26  124.23   10.46
  -1  -2  26  103.57   15.77
   1   2 -25   34.56   12.63
  -1  -2  25   53.51   12.26
  -1  -2  25   36.05    6.95
  -1  -2  25   59.25    6.95
  -1  -2  24  118.17    9.87
  -1  -2  24  119.87    8.71
  -1  -2  24   87.06   13.17
   1   2 -24  108.67   16.51
  -1  -2  23   25.38   10.56
   1   2 -23   39.66   12.00
  -1  -2  23   18.69    4.94
  -1  -2  23   20.49    5.68
  -1  -2  22   73.47    7.80
   1   2 -22   76.50   13.22
  -1  -2  22   74.27    6.74
  -1  -2  22   93.91   12.95
  -1  -2  21    9.24    3.88
   1   2 -21    8.76    8.97
  -1  -2  21   12.26    4.78
  -1  -2  21   14.49    8.39
  -1  -2  20   34.83    5.79
   1   2 -20   59.99   11.57
  -1  -2  20   36.42    9.02
  -1  -2  20   46.56    5.79
  -1  -2  19    4.94    4.25
   1   2 -19   15.93    7.22
  -1  -2  19    5.63    6.53
  -1  -2  19   13.80    3.98
  -1  -2  18  196.53    9.24
   1   2 -18  182.78   15.13
  -1  -2  18  196.85   10.41
  -1  -2  18  178.85   14.71
  -1  -2  17    6.90    3.34
  -1  -2  17    2.92    3.61
  -1  -2  17    9.56    6.53
   1   2 -17    5.89    6.11
  -1  -2  16  248.13   10.67
  -1  -2  16  242.03    9.61
   1   2 -16  201.15   14.39
  -1  -2  16  243.35   15.45
  -1  -2  15  438.13   19.27
  -1  -2  15  469.40   12.95
  -1  -2  15  462.82   14.02
   1   2 -15  448.06   19.91
  -1  -2  14  538.84   13.59
   1   2 -14  514.42   20.44
  -1  -2  14  534.80   21.02
  -1  -2  14  543.14   14.71
  -1  -2  13  110.74    6.26
  -1  -2  13  104.74    9.82
   1   2 -13  100.81    9.29
  -1  -2  13  112.17    6.95
   1   2 -12   -2.28    6.74
  -1  -2  12    6.26    3.24
  -1  -2  12    3.40    2.65
  -1  -2  12   -0.32    5.20
  -1  -2  11    4.09    2.97
  -1  -2  11    5.31    4.57
  -1  -2  11    2.18    2.60
  -1  -2  10    3.56    4.62
  -1  -2  10    2.02    2.76
   1   2 -10   10.72    5.04
  -1  -2  10    4.46    2.65
  -1  -2   9 3022.01   38.44
  -1  -2   9 3014.26   27.02
   1   2  -9 3018.83   38.81
  -1  -2   8  113.77    6.16
  -1  -2   8  142.86    6.74
  -1  -2   7 4165.36   28.88
  -1  -2   7 4068.90   29.20
  -1  -2   7 4031.16   40.24
   1   2  -7 4058.71   41.30
   1   2  -6 1098.91   15.08
   1   2  -6 1115.21   21.24
  -1  -2   6 1094.77   19.96
  -1  -2   6 1165.75   14.55
   1   2  -5  619.32   15.29
  -1  -2   5  600.95   10.25
  -1  -2   5  602.12   13.96
   1   2  -5  594.42   10.62
  -1  -2   4  211.34    6.05
  -1  -2   4  197.80    8.12
   1   2  -4  189.31    8.92
   1   2  -4  189.58    5.84
   1   2  -3   10.14    3.98
  -1  -2   3    8.71    2.18
   1   2  -3    7.91    2.39
  -1  -2   3   10.03    3.93
   1   2  -2   91.52    3.72
   1   2  -2   82.71    4.78
  -1  -2   2   89.98    3.61
  -1  -2   2   73.63    4.83
  -1  -2   1  384.30    6.42
   1   2  -1  382.07    6.64
   1   2   0   30.74    2.18
  -1  -2   0   23.20    1.96
  -1  -2  -1  299.20    5.47
   1   2   1  333.34    5.68
   1   2   2  184.32    4.46
  -1  -2  -2  180.07    4.41
  -1  -2  -3  321.13    6.11
   1   2   3  330.15    6.00
   1   2   4   12.26    2.97
   1   2   4   10.67    2.12
  -1  -2  -4    7.80    2.71
  -1  -2  -4    8.28    2.07
  -1  -2  -5   38.38    4.25
   1   2   5   37.11    2.97
   1   2   5   47.09    4.62
   1   2   6  317.15    9.82
   1   2   6  347.72    7.06
  -1  -2  -6  335.25    7.33
  -1  -2  -6  300.10    9.56
  -1  -2  -7   19.80    3.88
  -1  -2  -7   22.56    2.60
   1   2   7   24.69    2.76
   1   2   7   20.60    4.35
   1   2   8   11.20    2.28
  -1  -2  -8   11.04    3.98
  -1  -2  -8    6.69    2.28
   1   2   8   13.80    4.14
  -1  -2  -9 3339.37   26.01
  -1  -2  -9 3211.22   36.37
   1   2   9 3264.04   35.94
   1   2   9 3361.61   24.63
   1   2  10  191.33    6.64
   1   2  10  194.94   10.19
  -1  -2 -10  186.34   10.30
  -1  -2 -10  176.83    6.80
   1   2  11  759.58   19.85
   1   2  11  737.60   13.01
  -1  -2 -11  819.62   14.49
  -1  -2 -11  828.38   21.50
  -1  -2 -12  368.85   10.30
   1   2  12  356.01   14.44
   1   2  12  364.71    9.61
  -1  -2 -12  372.14   15.18
  -1  -2 -13  114.51    6.48
   1   2  13  113.82    9.77
   1   2  13  119.02    6.05
  -1  -2 -13  125.45   10.25
   1   2  14  557.42   12.69
   1   2  14  511.98   19.01
  -1  -2 -14  492.12   18.79
  -1  -2 -14  529.23   13.11
   1   2  15    1.38    2.39
  -1  -2 -15    4.35    4.67
  -1  -2 -15    1.33    3.03
   1   2  15    4.78    4.57
  -1  -2 -16   15.77    5.95
   1   2  16   17.15    6.00
   1   2  16   18.63    3.29
  -1  -2 -16   15.45    3.50
  -1  -2 -17   12.10    3.50
   1   2  17   20.44    3.88
   1   2  17   28.08    7.17
  -1  -2 -17   12.53    5.95
  -1  -2 -18   12.69    3.88
  -1  -2 -18   17.41    6.90
   1   2  18   27.34    7.54
   1   2  18   16.24    3.50
   1   2  19  227.00   15.55
  -1  -2 -19  219.84   15.66
  -1  -2 -19  246.65   10.88
   1   2  19  251.90   10.03
   1   2  20   47.30    8.92
  -1  -2 -20   39.23    8.87
  -1  -2 -20   51.34    6.05
   1   2  20   45.81    5.04
  -1  -2 -21   73.31   11.36
   1   2  21   51.49    9.29
  -1  -2 -21   75.07    7.33
   1   2  21   65.09    6.00
   1   2  22   88.87   12.26
  -1  -2 -22   81.70   12.10
   1   2  22  104.53    7.33
  -1  -2 -22  109.84    8.65
  -1  -2 -23   96.35    8.87
   1   2  23   80.06    6.85
   1   2  23   92.37   12.85
  -1  -2 -23   79.90   12.79
  -1  -2 -24  238.15   19.96
  -1  -2 -24  279.72   14.07
   1   2  24  257.10   11.52
   1   2  24  236.72   18.90
   1   2  25  217.82   19.38
   1   2  25  221.32   11.15
  -1  -2 -25  188.20   18.05
  -1  -2 -25  222.81   13.11
  -1  -2 -26  153.42   17.68
   1   2  26  156.13   17.04
  -1  -2 -26  155.60   11.25
   1   2  26  150.72    9.61
   1   2  27  198.18   19.01
  -1  -2 -27  196.05   12.79
   1   2  27  207.36   11.15
  -1  -2 -27  184.64   19.96
  -1  -2 -28   35.25    7.54
  -1  -2 -28   45.55   13.22
   1   2  28   36.95   11.20
   1   2  28   36.52    5.89
   1   2  29  112.07    9.34
  -1  -2 -29   87.38   16.09
  -1  -2 -29  113.08   10.94
  -1  -2 -30   56.64   15.13
   1   2  30   75.12    8.28
   1   2  31  147.32   10.83
  -1  -2 -31  162.82   20.86
   1   2  32   22.93    6.48
   1   2  32   28.88    9.24
  -1  -2 -32   13.64   13.38
   1   2  33  -10.56    9.13
   1   2  33   14.02    6.95
  -1  -3  32   25.91    9.08
  -1  -3  31    8.65    6.37
  -1  -3  31   -1.43    7.06
  -1  -3  30   35.73    7.27
   1   3 -30   12.69   15.02
  -1  -3  30   27.45    7.70
  -1  -3  29   12.26    7.06
  -1  -3  29    1.59    5.52
   1   3 -29    0.80   13.43
  -1  -3  28   34.88    6.58
  -1  -3  28   31.69    7.38
   1   3 -28   33.71   16.14
  -1  -3  27    4.30    4.99
  -1  -3  27   20.70   10.51
   1   3 -27   -1.17   12.16
  -1  -3  27    3.50    6.16
  -1  -3  26   29.52    6.00
   1   3 -26   10.03   13.38
  -1  -3  26   23.04   12.48
  -1  -3  26   20.97    6.48
  -1  -3  25    1.91    5.63
  -1  -3  25    5.68    4.30
   1   3 -25    7.49   11.63
  -1  -3  25    0.05    8.97
  -1  -3  24   19.64    6.37
  -1  -3  24   21.39    5.20
  -1  -3  24   34.08   10.09
  -1  -3  23   27.87   10.30
  -1  -3  23   29.57    5.63
   1   3 -23   40.77   14.81
  -1  -3  23   28.14    6.69
  -1  -3  22   21.02    9.50
   1   3 -22   15.02   10.03
  -1  -3  22   32.60    6.37
  -1  -3  22   32.97    5.73
  -1  -3  21   57.23    6.53
   1   3 -21   57.81   12.16
  -1  -3  21   70.93    7.91
  -1  -3  21   63.39   11.47
  -1  -3  20    0.74    7.64
  -1  -3  20    8.28    4.67
  -1  -3  20   11.84    4.35
   1   3 -20   -0.58    8.39
  -1  -3  19   24.69    5.10
  -1  -3  19   23.09    4.78
   1   3 -19   22.14    9.66
  -1  -3  19   21.29    8.02
  -1  -3  18  253.97   17.20
   1   3 -18  234.33   18.37
  -1  -3  18  247.18   11.63
  -1  -3  18  262.62   11.15
   1   3 -17   10.46    7.17
  -1  -3  17   15.55    4.46
  -1  -3  17   14.07    4.09
  -1  -3  17   20.65    7.49
   1   3 -16   85.68   11.25
  -1  -3  16  109.94    7.38
  -1  -3  16   98.21   11.25
  -1  -3  16   99.38    7.49
  -1  -3  15  136.54    7.80
  -1  -3  15  130.86    8.28
   1   3 -15  122.74   12.26
  -1  -3  15  144.24   12.48
  -1  -3  14  357.97   17.20
  -1  -3  14  341.94   12.10
  -1  -3  14  327.55   11.41
   1   3 -14  339.28   18.47
  -1  -3  13  966.14   18.63
  -1  -3  13  921.28   18.47
   1   3 -13  943.95   28.93
  -1  -3  13  930.04   26.38
   1   3 -12   82.39   10.03
  -1  -3  12   74.38    5.63
  -1  -3  12   74.85    5.68
  -1  -3  12   76.98    8.49
  -1  -3  11   33.23    4.19
  -1  -3  11   24.85    6.16
  -1  -3  10    7.64    3.34
   1   3 -10   14.39    6.37
  -1  -3  10    3.56    2.92
  -1  -3  10    5.84    4.88
   1   3  -9   71.40    8.44
  -1  -3   9   58.61    5.20
  -1  -3   9   50.86    5.10
  -1  -3   9   74.80    7.43
  -1  -3   8   12.05    3.19
  -1  -3   8   14.23    4.51
  -1  -3   8   16.14    3.24
   1   3  -8    9.40    5.15
  -1  -3   7 1130.93   22.62
  -1  -3   7 1094.99   16.35
   1   3  -7 1075.29   24.05
   1   3  -7 1061.59   17.09
  -1  -3   6  555.46   11.36
   1   3  -6  521.90   12.00
  -1  -3   6  549.72   15.40
   1   3  -6  540.49   16.35
   1   3  -5  241.44    7.91
   1   3  -5  293.26   11.57
  -1  -3   5  278.98    8.12
  -1  -3   5  287.26   11.73
  -1  -3   4  867.77   12.85
  -1  -3   4  780.71   17.73
   1   3  -4  793.02   17.04
   1   3  -4  819.09   12.90
  -1  -3   3 2392.02   20.23
   1   3  -3 2301.30   20.39
   1   3  -2   58.50    4.35
  -1  -3   2   68.85    4.41
  -1  -3   2   62.17    6.37
   1   3  -1  621.28   10.35
  -1  -3   1  678.94   10.46
   1   3   0 6133.37   28.93
  -1  -3   0 4938.69   25.69
  -1  -3  -1 2121.70   16.93
   1   3   1 2132.37   17.09
   1   3   2 2095.53   16.46
  -1  -3  -2 2100.46   16.62
  -1  -3  -3 2906.71   19.80
   1   3   3 2991.59   20.23
  -1  -3  -4   86.06    3.88
   1   3   4   84.67    3.88
   1   3   5  330.79    7.01
  -1  -3  -5  281.21    8.76
  -1  -3  -5  302.81    6.85
  -1  -3  -6 1182.69   13.59
   1   3   6 1144.83   18.32
  -1  -3  -6 1176.16   18.58
   1   3   7  561.61   13.80
  -1  -3  -7  460.96    9.34
  -1  -3  -7  532.52   13.75
   1   3   7  493.02    9.40
   1   3   8  131.18    5.26
   1   3   8  155.55    8.12
  -1  -3  -8  127.99    5.36
  -1  -3  -8  140.84    7.91
   1   3   9  406.55   13.01
  -1  -3  -9  370.07   12.79
  -1  -3  -9  407.77    9.18
   1   3   9  407.50    8.92
   1   3  10   19.43    4.46
  -1  -3 -10   18.95    4.78
  -1  -3 -10   12.74    2.55
   1   3  10   12.95    2.65
   1   3  11  724.49   19.11
  -1  -3 -11  691.47   18.95
   1   3  11  670.34   12.16
  -1  -3 -11  709.52   13.06
   1   3  12    7.38    2.55
  -1  -3 -12   11.15    3.08
   1   3  12    8.18    4.46
  -1  -3 -12    6.32    4.72
   1   3  13  489.57   17.25
   1   3  13  496.10   11.10
  -1  -3 -13  483.52   17.73
  -1  -3 -13  494.09   12.00
  -1  -3 -14   79.31    5.41
   1   3  14   89.77    8.49
   1   3  14   72.36    4.94
  -1  -3 -14   84.78    9.08
  -1  -3 -15   -0.90    2.81
   1   3  15    2.92    5.10
  -1  -3 -15   -1.06    5.04
   1   3  15    2.92    2.55
   1   3  16   50.96    4.62
   1   3  16   49.16    7.54
  -1  -3 -16   42.52    4.83
  -1  -3 -16   43.32    7.75
   1   3  17   12.16    5.84
  -1  -3 -17    3.72    5.52
   1   3  17    3.45    2.71
  -1  -3 -17    6.95    3.34
   1   3  18   25.38    6.58
   1   3  18   21.29    3.66
  -1  -3 -18   23.89    6.69
  -1  -3 -18   27.50    4.51
  -1  -3 -19   61.10    5.95
   1   3  19   54.79    5.04
  -1  -3 -19   64.13    9.29
  -1  -3 -20   67.32   10.09
   1   3  20   51.87    9.13
   1   3  20   71.72    5.95
  -1  -3 -20   62.38    6.26
  -1  -3 -21   10.72    4.14
   1   3  21   18.05    3.88
   1   3  21   20.54    7.17
  -1  -3 -21   23.15    7.86
  -1  -3 -22   19.06    4.94
   1   3  22   20.81    7.75
   1   3  22   18.32    4.09
  -1  -3 -22   27.45    9.18
  -1  -3 -23  122.21   14.55
   1   3  23  132.19   13.70
   1   3  23  124.12    8.02
  -1  -3 -23  133.57    9.50
  -1  -3 -24   14.28    4.99
   1   3  24   11.31    3.88
   1   3  24   10.94    9.72
  -1  -3 -24   21.77    9.72
   1   3  25   13.96    4.19
  -1  -3 -25    4.46    8.49
  -1  -3 -25   31.27    6.64
   1   3  25   39.76   10.62
  -1  -3 -26   85.26    9.13
   1   3  26   76.29    7.27
  -1  -3 -26   73.42   13.86
   1   3  26  101.45   14.60
  -1  -3 -27   18.47    6.48
   1   3  27   15.02    9.87
   1   3  27   18.90    5.10
  -1  -3 -27    8.28    9.40
   1   3  28   93.17   15.13
   1   3  28   68.38    7.33
  -1  -3 -28   67.05    8.55
  -1  -3 -28   60.47   13.27
  -1  -3 -29   76.55    9.40
   1   3  29   92.90    8.33
  -1  -3 -30   17.68   12.74
   1   3  30    4.51    4.99
  -1  -3 -30    8.12    7.11
  -1  -3 -31   19.70   12.48
   1   3  31   20.70    5.95
  -1  -3 -32   90.20   18.85
   1   3  32   71.83    8.39
   1   3  33    1.49    8.39
  -1  -4  32    5.57    7.86
  -1  -4  31   16.09    8.33
  -1  -4  31    6.48    6.26
  -1  -4  30   17.04    7.11
  -1  -4  30   28.56    8.39
   1   4 -30   18.21   15.29
  -1  -4  29   10.25    6.26
   1   4 -29    2.65   14.39
  -1  -4  29   16.09    7.49
  -1  -4  28   16.09    6.26
  -1  -4  28   18.16    7.22
   1   4 -28   33.55   15.82
   1   4 -27   15.24   13.86
  -1  -4  27    0.16    5.31
  -1  -4  27    3.34    5.89
  -1  -4  26   27.98    7.27
   1   4 -26    7.91   11.47
  -1  -4  26    3.19   10.35
  -1  -4  26    7.70    5.41
  -1  -4  25   11.41    5.41
   1   4 -25   -1.65   11.15
  -1  -4  25   11.41    6.11
  -1  -4  25    1.70    9.40
  -1  -4  24   84.30   13.54
  -1  -4  24   79.84    8.12
   1   4 -24   89.08   16.40
  -1  -4  24   78.68    8.87
  -1  -4  23   20.54    5.68
  -1  -4  23   31.59   11.36
  -1  -4  23   15.13    5.89
  -1  -4  22   14.76    9.72
  -1  -4  22   10.03    5.10
   1   4 -22    3.40   10.83
  -1  -4  22   13.22    5.73
  -1  -4  21    4.83    8.60
  -1  -4  21    5.57    5.36
  -1  -4  21    8.07    4.78
   1   4 -21    5.31   10.25
  -1  -4  20  185.70   16.03
   1   4 -20  184.11   18.21
  -1  -4  20  202.69   10.83
  -1  -4  20  189.79   11.25
   1   4 -19   53.30   12.48
  -1  -4  19   52.19    6.37
  -1  -4  19   58.18   10.56
  -1  -4  19   45.81    6.32
  -1  -4  18   20.76    8.44
   1   4 -18   18.10    8.97
  -1  -4  18   13.96    4.72
  -1  -4  18   25.75    5.15
  -1  -4  17    2.23    6.16
  -1  -4  17    6.64    3.66
  -1  -4  17    7.86    4.30
   1   4 -17   10.83    8.49
  -1  -4  16   12.21    4.67
  -1  -4  16   12.16    6.32
   1   4 -16   12.53    7.75
  -1  -4  16   12.10    4.14
  -1  -4  15    4.78    5.47
  -1  -4  15    5.63    3.61
  -1  -4  15    7.91    4.14
   1   4 -15    4.67    7.17
  -1  -4  14   32.01    6.95
  -1  -4  14   31.64    4.67
   1   4 -14   39.76    8.12
  -1  -4  14   40.61    5.04
   1   4 -13  154.75   12.95
  -1  -4  13  192.28   13.17
  -1  -4  13  173.76    8.81
  -1  -4  13  166.32    8.76
  -1  -4  12   25.75    6.26
  -1  -4  12   27.55    4.57
  -1  -4  12   26.81    4.41
   1   4 -12   11.47    6.11
  -1  -4  11  222.22   12.85
  -1  -4  11  216.39    9.24
  -1  -4  11  216.76    9.34
   1   4 -11  182.57   12.26
  -1  -4  10  291.19   10.14
  -1  -4  10  296.65   14.12
  -1  -4  10  297.77   10.83
   1   4 -10  275.95   14.81
  -1  -4   9  214.37    8.87
   1   4  -9  213.73   12.90
  -1  -4   9  203.33    8.39
  -1  -4   9  201.47   11.68
  -1  -4   8   24.15    3.77
   1   4  -8   23.15    6.42
  -1  -4   8   18.05    5.10
   1   4  -8   21.02    3.93
   1   4  -7 1336.43   26.92
  -1  -4   7 1397.16   19.70
  -1  -4   7 1371.47   26.54
   1   4  -7 1374.97   20.86
  -1  -4   6 1315.72   26.28
   1   4  -6 1346.30   19.59
   1   4  -6 1287.22   25.38
  -1  -4   6 1369.13   18.79
  -1  -4   5 1840.55   29.94
  -1  -4   5 1817.45   20.86
   1   4  -5 1760.28   21.29
  -1  -4   4 2049.66   29.41
   1   4  -4 1936.85   21.50
  -1  -4   4 2002.15   21.08
  -1  -4   3  606.05   16.09
  -1  -4   3  612.42   11.52
   1   4  -3  563.10   11.25
  -1  -4   2  277.70    7.49
   1   4  -2  261.83    7.64
  -1  -4   1  106.07    4.94
   1   4  -1   93.75    4.78
  -1  -4   0  200.25    6.16
   1   4   0  206.09    6.26
  -1  -4  -1   42.89    3.34
   1   4   1   44.28    3.45
   1   4   2  164.73    5.47
  -1  -4  -2  163.30    5.47
  -1  -4  -3  141.21    5.04
   1   4   3  145.51    5.10
   1   4   4   40.72    3.13
  -1  -4  -4   38.86    2.97
   1   4   5   -1.33    2.23
  -1  -4  -5    0.32    1.86
   1   4   6  684.62   10.94
  -1  -4  -6  651.28   14.55
  -1  -4  -6  678.73   10.88
   1   4   7  424.54    8.81
  -1  -4  -7  466.22   13.11
  -1  -4  -7  415.30    8.92
   1   4   8   73.47    4.03
  -1  -4  -8   73.31    4.14
  -1  -4  -8   80.48    6.37
  -1  -4  -9  240.70    7.22
  -1  -4  -9  234.28   10.51
   1   4   9  222.54   10.03
   1   4   9  235.82    7.01
  -1  -4 -10  281.47    8.07
   1   4  10  300.00   12.05
  -1  -4 -10  303.56   12.53
   1   4  11    5.26    2.12
  -1  -4 -11    7.80    2.50
  -1  -4 -11   14.55    4.99
   1   4  11   10.51    4.30
  -1  -4 -12  509.27   11.41
  -1  -4 -12  541.33   18.05
   1   4  12  545.58   17.47
   1   4  12  516.12   11.15
   1   4  13  219.84    7.59
  -1  -4 -13  227.69   12.42
  -1  -4 -13  226.52    8.12
   1   4  13  225.83   12.05
   1   4  14  126.51    6.05
   1   4  14  130.44    9.98
  -1  -4 -14  128.68   10.14
  -1  -4 -14  129.11    6.58
  -1  -4 -15  487.56   19.22
  -1  -4 -15  467.33   12.42
   1   4  15  454.85   11.41
   1   4  15  479.54   18.53
  -1  -4 -16  130.12   11.15
   1   4  16  116.85    6.26
   1   4  16  118.76   10.30
  -1  -4 -16  125.50    7.17
   1   4  17   81.12    8.92
   1   4  17   85.79    5.68
  -1  -4 -17   96.46    6.58
  -1  -4 -17   97.84   10.41
  -1  -4 -18   27.87    4.14
   1   4  18   20.86    3.72
   1   4  18   15.50    5.89
  -1  -4 -18   22.30    7.01
   1   4  19  269.69   16.46
  -1  -4 -19  262.20   10.83
   1   4  19  243.62    9.56
  -1  -4 -19  261.46   16.62
  -1  -4 -20    6.53    3.50
   1   4  20    6.16    6.11
   1   4  20   11.25    3.77
  -1  -4 -20   16.19    7.75
   1   4  21   61.48    9.82
   1   4  21   48.36    5.31
  -1  -4 -21   53.46    5.95
  -1  -4 -21   60.36   10.78
   1   4  22  456.71   13.91
  -1  -4 -22  460.48   23.94
  -1  -4 -22  471.21   15.66
   1   4  22  495.68   24.00
   1   4  23  820.10   18.74
  -1  -4 -23  868.94   33.39
   1   4  23  855.88   32.01
  -1  -4 -23  861.88   21.50
  -1  -4 -24   30.37   10.99
  -1  -4 -24   27.29    6.05
   1   4  24   35.09    9.66
   1   4  24   25.91    4.67
  -1  -4 -25   -5.10    4.78
  -1  -4 -25    1.59    8.60
   1   4  25    0.96    7.91
   1   4  25    1.65    3.77
  -1  -4 -26   -3.93   10.14
   1   4  26   -5.31    3.88
  -1  -4 -26    4.72    5.04
   1   4  26   10.30    8.87
  -1  -4 -27   56.17   12.95
   1   4  27   55.53    6.42
   1   4  27   50.75   12.63
  -1  -4 -27   58.13    7.96
   1   4  28   -0.48    4.35
   1   4  28  -10.25   10.94
  -1  -4 -28    9.93   11.20
  -1  -4 -28   -2.81    5.73
   1   4  29   90.83    8.28
  -1  -4 -29   67.05   14.65
  -1  -4 -29   77.40    9.02
   1   4  30   18.79    5.63
  -1  -4 -30   20.33   13.01
  -1  -4 -30   10.41    6.53
  -1  -4 -31   35.36   15.55
   1   4  31   29.20    6.16
  -1  -4 -31   34.40    8.39
   1   4  32    3.03    5.95
  -1  -4 -32    1.06   13.06
  -1  -4 -32   -2.34    6.53
  -1  -5  32    6.11    8.12
  -1  -5  31    3.93    8.02
  -1  -5  31   19.91    8.07
  -1  -5  30   27.07    8.33
  -1  -5  30   -0.42    7.70
   1   5 -30    9.13   15.13
   1   5 -29   16.03   16.14
  -1  -5  29   14.86    7.96
  -1  -5  29   20.86    7.49
  -1  -5  28   16.56    7.11
   1   5 -28    9.61   13.27
  -1  -5  28    4.14    6.69
  -1  -5  27    1.70    5.57
  -1  -5  27    2.87    6.26
   1   5 -26   28.88   14.39
  -1  -5  26   16.62    6.95
  -1  -5  26   24.00    7.01
  -1  -5  26    9.08   11.84
   1   5 -25   31.64   13.27
  -1  -5  25   29.62    7.33
  -1  -5  25   28.56    6.90
  -1  -5  25   26.60   11.15
  -1  -5  24   -2.50    5.57
   1   5 -24    7.11   11.73
  -1  -5  24   -3.61    5.52
  -1  -5  24   -1.27    8.65
  -1  -5  23    5.73    4.67
  -1  -5  23    8.33    5.84
  -1  -5  23   -8.65    9.93
  -1  -5  22    6.80    4.88
  -1  -5  22    5.68    5.20
  -1  -5  22   13.59    9.18
   1   5 -21   39.60   11.68
  -1  -5  21   70.13   13.06
  -1  -5  21   44.91    6.69
  -1  -5  21   43.21    6.90
  -1  -5  20   -3.45    8.28
   1   5 -20   17.52   10.62
  -1  -5  20    5.15    4.78
  -1  -5  20   -4.03    4.67
  -1  -5  19  164.09   15.13
  -1  -5  19  168.08   10.35
  -1  -5  19  157.46   10.46
   1   5 -19  155.12   16.35
  -1  -5  18  135.00    9.45
   1   5 -18  129.75   15.45
  -1  -5  18  140.26    9.93
  -1  -5  18  123.75   13.22
  -1  -5  17   53.83    9.13
   1   5 -17   62.06   11.36
  -1  -5  17   48.58    6.32
  -1  -5  17   49.80    6.21
  -1  -5  16    3.61    3.98
  -1  -5  16    5.20    6.37
   1   5 -16    1.38    7.27
  -1  -5  16   -0.64    4.03
   1   5 -15  315.13   19.43
  -1  -5  15  277.06   12.05
  -1  -5  15  332.33   18.74
  -1  -5  15  285.66   12.32
  -1  -5  14   57.97    8.97
  -1  -5  14   56.27    6.26
   1   5 -14   68.11   10.99
  -1  -5  14   55.37    6.26
  -1  -5  13  228.65   10.51
  -1  -5  13  247.49   14.92
   1   5 -13  228.75   16.09
  -1  -5  13  231.83   10.78
   1   5 -12   26.49    7.49
  -1  -5  12   11.79    5.36
  -1  -5  12   15.82    3.98
  -1  -5  12   13.59    3.66
  -1  -5  11    2.39    3.45
   1   5 -11    1.22    5.52
  -1  -5  11   -7.38    6.00
  -1  -5  11    1.54    3.13
  -1  -5  10  450.61   18.10
  -1  -5  10  453.47   13.27
   1   5 -10  423.90   18.00
   1   5  -9   79.68    6.48
  -1  -5   9   74.43    5.79
   1   5  -9   70.18    8.49
  -1  -5   9   64.61    7.86
  -1  -5   8   21.77    4.03
  -1  -5   8   15.87    5.68
   1   5  -8   18.90    4.41
   1   5  -8   25.69    6.53
   1   5  -7   22.83    7.01
  -1  -5   7   23.68    3.98
  -1  -5   7   18.47    6.53
   1   5  -7   16.88    4.03
   1   5  -6   14.97    3.56
  -1  -5   6   22.99    3.66
  -1  -5   6   24.63    6.00
  -1  -5   5  230.40   11.89
  -1  -5   5  204.17    7.91
   1   5  -5  207.04    8.23
   1   5  -4 3311.98   30.42
  -1  -5   4 3280.39   29.30
   1   5  -3 4642.19   34.98
  -1  -5   3 4755.27   34.35
  -1  -5   2   95.98    5.20
   1   5  -2   97.15    5.52
   1   5  -1 1028.78   15.55
  -1  -5   1  632.06   12.10
  -1  -5   0 5050.97   32.44
   1   5   0 5224.25   33.76
   1   5   1 1609.72   18.47
  -1  -5  -1 1639.77   18.16
  -1  -5  -2   26.65    3.34
   1   5   2   25.43    3.50
  -1  -5  -3 5576.43   32.86
   1   5   3 5457.46   32.91
   1   5   4  774.50   12.58
  -1  -5  -4  779.27   12.37
   1   5   5  420.88    9.24
  -1  -5  -5  414.88    9.24
   1   5   6  988.39   14.28
  -1  -5  -6  975.01   13.70
   1   5   7  166.96    6.21
  -1  -5  -7  185.75    9.29
  -1  -5  -7  162.24    6.11
  -1  -5  -8 1426.73   24.74
  -1  -5  -8 1389.89   17.15
   1   5   8 1456.83   17.63
   1   5   9 4636.04   31.64
  -1  -5  -9 4637.89   31.91
  -1  -5  -9 4756.01   47.09
  -1  -5 -10   19.11    4.99
  -1  -5 -10   19.64    3.08
   1   5  10   17.63    2.92
   1   5  11  359.46    9.45
  -1  -5 -11  391.89   10.03
  -1  -5 -11  373.37   14.92
  -1  -5 -12  661.95   13.43
   1   5  12  597.50   12.26
  -1  -5 -12  605.52   19.06
   1   5  12  614.65   19.22
  -1  -5 -13    5.04    4.35
   1   5  13    6.16    4.57
  -1  -5 -13    3.66    2.50
   1   5  13    2.76    2.34
   1   5  14  240.33    8.44
  -1  -5 -14  246.54   13.80
  -1  -5 -14  243.88    8.81
   1   5  14  248.56   13.59
  -1  -5 -15    9.87    5.63
  -1  -5 -15    3.82    2.60
   1   5  15    8.28    2.87
   1   5  15    3.88    4.46
   1   5  16  199.13    8.23
   1   5  16  220.37   14.28
  -1  -5 -16  217.87    9.02
  -1  -5 -16  198.18   13.32
  -1  -5 -17  151.94   12.58
   1   5  17  145.25   11.84
  -1  -5 -17  141.69    7.80
   1   5  17  139.30    7.33
  -1  -5 -18   63.02    5.68
  -1  -5 -18   48.31    8.49
   1   5  18   50.49    8.49
   1   5  18   52.72    4.83
   1   5  19   97.63   10.78
   1   5  19   94.60    6.37
  -1  -5 -19   84.89   11.20
  -1  -5 -19  104.85    7.38
  -1  -5 -20    3.98    6.74
   1   5  20    4.30    3.40
  -1  -5 -20    3.45    3.50
   1   5  20    8.28    6.85
  -1  -5 -21   54.04    9.98
  -1  -5 -21   58.13    6.37
   1   5  21   52.93    9.66
   1   5  21   46.61    5.36
  -1  -5 -22    6.16    4.30
   1   5  22   -1.27    3.29
   1   5  22   10.94    7.49
   1   5  23   28.35    8.81
  -1  -5 -23   17.84    9.40
  -1  -5 -23   30.15    5.63
   1   5  23   32.60    4.83
  -1  -5 -24   59.51    6.95
   1   5  24   70.29   11.47
  -1  -5 -24   51.34   11.36
   1   5  24   60.63    6.21
   1   5  25   83.45    7.22
   1   5  25   82.76   13.38
  -1  -5 -25   84.99    8.23
  -1  -5 -25   98.37   14.86
   1   5  26   86.48    7.49
  -1  -5 -26   92.85    8.87
  -1  -5 -26   91.84   14.86
   1   5  26   93.59   13.70
   1   5  27  -14.33   11.04
  -1  -5 -27    6.37   10.78
   1   5  27    3.88    4.25
  -1  -5 -27    4.83    4.83
   1   5  28   29.30    5.47
   1   5  28   32.17   11.68
  -1  -5 -28   26.70   12.48
  -1  -5 -28   24.63    6.74
  -1  -5 -29    6.42   11.04
  -1  -5 -29    7.86    6.16
   1   5  29   -7.59    4.88
  -1  -5 -30   25.85    7.27
  -1  -5 -30   33.92   13.91
   1   5  30   32.44    6.37
  -1  -5 -31   -0.58    6.80
   1   5  31   -4.51    5.41
  -1  -5 -31    5.57   13.06
   1   5  32    0.69    5.15
  -1  -5 -32   11.63   12.95
  -1  -5 -32   14.49    7.33
  -1  -6  32   12.58    9.98
  -1  -6  31   55.80    9.87
  -1  -6  31   55.64   10.88
  -1  -6  30    2.12    7.59
  -1  -6  30   25.43    8.49
  -1  -6  29   16.19    7.49
  -1  -6  29   19.54    8.28
   1   6 -29   18.42   16.78
   1   6 -28   10.19   13.80
  -1  -6  28    2.81    7.11
  -1  -6  28   15.66    7.70
  -1  -6  27    9.08    6.53
  -1  -6  27    9.72    7.11
   1   6 -27   17.68   14.17
  -1  -6  26   93.86   16.03
  -1  -6  26   91.68   10.67
  -1  -6  26   74.75    9.40
   1   6 -26   86.69   17.73
  -1  -6  25   39.66   12.21
   1   6 -25   16.93   12.32
  -1  -6  25   25.43    6.74
  -1  -6  25   33.50    7.64
   1   6 -24   11.68   11.68
  -1  -6  24    3.82    5.79
  -1  -6  24   -1.43    5.47
  -1  -6  24  -13.86    9.98
  -1  -6  23    2.87    9.40
  -1  -6  23    7.38    5.41
   1   6 -23    8.92   11.73
  -1  -6  23   -2.23    5.57
  -1  -6  22  368.43   16.51
  -1  -6  22  365.08   16.67
  -1  -6  22  357.70   24.69
  -1  -6  21   40.72    6.95
  -1  -6  21   52.61   11.41
   1   6 -21   34.40   11.89
  -1  -6  21   44.54    7.54
   1   6 -20  251.16   20.54
  -1  -6  20  241.60   13.06
  -1  -6  20  239.05   13.43
  -1  -6  20  230.40   18.63
   1   6 -19   57.02   11.63
  -1  -6  19   55.64   10.62
  -1  -6  19   50.38    7.06
  -1  -6  19   59.25    7.38
  -1  -6  18   -3.93    4.57
  -1  -6  18    8.23    7.64
  -1  -6  18    9.45    5.04
   1   6 -17   -6.85    9.40
  -1  -6  17    7.38    7.33
  -1  -6  17    8.33    4.67
  -1  -6  17    7.01    4.57
  -1  -6  16    8.02    4.46
  -1  -6  16   11.20    4.57
  -1  -6  16   10.62    7.22
   1   6 -16   21.39    8.87
  -1  -6  15   18.00    5.41
  -1  -6  15   10.35    7.27
  -1  -6  15   13.96    4.99
   1   6 -15   22.62    8.23
  -1  -6  14  616.45   18.69
   1   6 -14  611.57   25.59
  -1  -6  14  620.38   24.00
  -1  -6  14  612.47   17.94
   1   6 -13  436.86   21.24
  -1  -6  13  440.79   20.17
  -1  -6  13  483.84   15.61
  -1  -6  13  475.19   16.09
   1   6 -12  310.88   17.68
  -1  -6  12  331.48   12.79
  -1  -6  12  340.61   13.54
  -1  -6  12  318.79   16.99
  -1  -6  11  253.17   11.36
  -1  -6  11  258.01   11.15
  -1  -6  11  300.32   17.31
   1   6 -11  276.06   16.78
  -1  -6  10   93.27    9.50
   1   6 -10   92.11   10.83
  -1  -6  10  104.37    7.43
  -1  -6   9  103.41    7.17
  -1  -6   9   72.41    8.81
   1   6  -9   89.29    7.38
   1   6  -9   99.49   11.25
  -1  -6   8  101.40   10.88
   1   6  -8   85.26    7.17
  -1  -6   8   83.35    6.32
   1   6  -7  429.21   13.59
  -1  -6   7  423.96   18.21
  -1  -6   7  446.94   13.11
   1   6  -6  198.44    9.72
  -1  -6   6  220.79    9.40
  -1  -6   6  228.70   14.17
  -1  -6   5  348.57   15.18
   1   6  -5  370.50   12.10
  -1  -6   5  376.34   11.73
   1   6  -4  824.61   16.99
  -1  -6   4  882.00   16.83
   1   6  -3   10.88    3.61
  -1  -6   3   15.02    3.50
   1   6  -2 3276.51   31.75
  -1  -6   2 3317.98   30.53
  -1  -6   1   98.90    6.21
   1   6  -1   92.53    6.69
  -1  -6   0 6952.51   41.46
   1   6   0 5967.21   40.40
   1   6   1  539.79   12.42
  -1  -6  -1  521.48   11.79
  -1  -6  -2 2580.70   25.22
   1   6   2 2541.57   26.07
  -1  -6  -3  169.56    6.74
   1   6   3  182.30    7.01
   1   6   4 2153.50   23.04
  -1  -6  -4 2104.45   22.24
   1   6   5 1902.93   21.55
  -1  -6  -5 1936.53   21.50
   1   6   6  429.90   10.51
  -1  -6  -6  412.07   10.35
  -1  -6  -7 2096.70   22.03
   1   6   7 2126.11   22.51
  -1  -6  -8   73.58    5.04
  -1  -6  -8   67.53    7.17
   1   6   8   85.21    5.26
  -1  -6  -9  185.70   10.83
   1   6   9  173.49    7.11
  -1  -6  -9  183.84    7.27
  -1  -6 -10  799.50   14.86
  -1  -6 -10  811.66   22.03
   1   6  10  797.75   14.86
   1   6  11  340.29    9.98
  -1  -6 -11  338.22    9.77
  -1  -6 -11  337.32   14.86
  -1  -6 -12   48.42    4.35
   1   6  12   46.13    4.30
  -1  -6 -12   41.20    6.80
  -1  -6 -13   62.86    4.94
   1   6  13   67.58    4.94
  -1  -6 -13   57.28    7.54
   1   6  14   31.59    3.98
  -1  -6 -14   23.25    6.32
  -1  -6 -14   22.30    3.29
  -1  -6 -15   25.75    3.72
   1   6  15   21.82    3.45
  -1  -6 -15   26.97    6.64
   1   6  16   83.29    9.29
   1   6  16   87.91    5.95
  -1  -6 -16   77.30    9.56
  -1  -6 -16   90.09    6.16
  -1  -6 -17   19.06    3.88
   1   6  17   16.62    6.26
   1   6  17   13.96    3.40
  -1  -6 -17   11.68    6.21
  -1  -6 -18    3.72    5.63
  -1  -6 -18    1.59    2.97
   1   6  18    3.50    2.71
   1   6  18    7.33    5.95
   1   6  19   -0.96    2.92
  -1  -6 -19    2.44    6.74
  -1  -6 -19   -2.65    3.29
   1   6  19   -0.69    5.79
  -1  -6 -20  515.37   15.40
   1   6  20  461.97   13.27
  -1  -6 -20  489.10   24.10
   1   6  20  457.30   22.19
   1   6  21   30.53    8.07
  -1  -6 -21   39.55    5.47
   1   6  21   31.06    4.83
  -1  -6 -21   30.74    9.08
   1   6  22   49.80    5.52
  -1  -6 -22   49.37    6.21
   1   6  22   62.91   10.51
  -1  -6 -22   48.95   10.62
  -1  -6 -23   62.48    6.90
   1   6  23   64.98    6.26
  -1  -6 -23   56.33   11.20
   1   6  23   61.16   11.36
  -1  -6 -24   54.68   11.57
   1   6  24   61.05    6.21
   1   6  24   55.64   11.25
  -1  -6 -24   55.48    7.17
  -1  -6 -25   -0.53    4.46
   1   6  25    9.66    4.46
   1   6  25    5.84    7.96
  -1  -6 -25   -2.55    8.49
  -1  -6 -26    0.64    4.67
   1   6  26    4.09    4.14
  -1  -6 -26   -5.31    8.92
   1   6  26   -6.48    9.56
   1   6  27   67.74   13.86
  -1  -6 -27   60.57   13.22
  -1  -6 -27   61.69    8.02
   1   6  27   72.04    7.11
  -1  -6 -28   -3.19    5.20
   1   6  28   -3.19    4.19
   1   6  28   14.33   10.72
  -1  -6 -28    2.76   11.47
  -1  -6 -29    3.61   12.21
  -1  -6 -29   12.21    6.26
   1   6  29   13.48    5.31
  -1  -6 -30   18.95    7.27
  -1  -6 -30   18.85   12.26
   1   6  30   15.66    5.20
  -1  -6 -31    9.77   12.42
   1   6  31   16.14    5.89
  -1  -6 -31   10.46    6.58
  -1  -6 -32   17.89    8.07
   1   6  32   -1.91    5.41
  -1  -7  32   38.28   12.10
  -1  -7  31   21.55    9.29
  -1  -7  31   12.10   10.03
  -1  -7  30   21.29    8.39
  -1  -7  30    4.94    8.02
  -1  -7  29   15.82    8.44
   1   7 -29    7.17   14.71
  -1  -7  29   11.63    7.38
   1   7 -28    0.69   14.12
  -1  -7  28   -2.50    7.54
  -1  -7  28   -4.51    7.43
  -1  -7  27    2.97    6.69
  -1  -7  27   13.91    6.95
   1   7 -27   -6.00   12.95
   1   7 -26   21.13   13.32
  -1  -7  26   20.92    7.27
  -1  -7  26   22.40    7.75
  -1  -7  25   15.18    6.90
  -1  -7  25  -11.73   11.04
   1   7 -25   20.65   12.26
  -1  -7  25    0.58    6.26
  -1  -7  24    7.27    6.69
  -1  -7  24    0.32   10.62
  -1  -7  24    2.65    5.95
   1   7 -24    7.33   11.84
  -1  -7  23    3.72    5.41
   1   7 -23   13.11   10.94
  -1  -7  23    1.22    5.79
  -1  -7  23   -0.27   10.30
  -1  -7  22    7.86    5.63
  -1  -7  22   20.76   11.20
  -1  -7  22   14.02    6.21
   1   7 -22   29.41   12.16
  -1  -7  21   31.43    7.06
  -1  -7  21   34.88   10.56
  -1  -7  21   28.56    6.90
   1   7 -21   52.29   14.23
  -1  -7  20  134.42   15.50
  -1  -7  20  151.25   11.04
  -1  -7  20  153.90   11.68
   1   7 -20  142.65   16.62
  -1  -7  19  137.82   10.78
  -1  -7  19  133.94   14.97
  -1  -7  19  140.95   10.99
   1   7 -19  124.54   15.77
  -1  -7  18  143.02   14.76
  -1  -7  18  148.17   10.67
  -1  -7  18  144.35   10.72
   1   7 -18  143.23   15.98
  -1  -7  17   94.60    8.87
  -1  -7  17  108.88    9.40
  -1  -7  17  105.17   13.32
  -1  -7  16   74.80   10.78
  -1  -7  16   77.35    7.75
   1   7 -16   50.27   10.51
  -1  -7  16   70.98    7.86
  -1  -7  15   57.76   10.19
  -1  -7  15   41.46    6.05
  -1  -7  15   53.94    7.33
   1   7 -15   51.65   10.78
  -1  -7  14   31.48    8.12
   1   7 -14   35.14    9.45
  -1  -7  14   27.82    5.63
  -1  -7  14   26.23    5.52
  -1  -7  13   13.32    4.35
   1   7 -13   18.37    9.29
  -1  -7  13   16.72    7.06
  -1  -7  13    9.87    4.30
  -1  -7  12  182.89   14.33
  -1  -7  12  199.03   11.25
  -1  -7  12  193.66   10.56
   1   7 -12  207.25   17.15
  -1  -7  11  429.85   14.81
  -1  -7  11  400.97   19.80
  -1  -7  10   19.27    4.94
   1   7 -10    8.76    4.67
  -1  -7   9  665.77   17.41
   1   7  -9  657.54   18.85
  -1  -7   8   16.14    7.17
   1   7  -8   14.33    4.51
  -1  -7   8   16.35    3.98
  -1  -7   7  138.93    8.39
   1   7  -7  128.21    8.60
  -1  -7   6   65.51    6.21
  -1  -7   6   52.29    8.12
   1   7  -6   57.76    6.21
  -1  -7   5   95.24    6.80
   1   7  -5   95.45    7.17
  -1  -7   5   92.90   10.35
  -1  -7   4  118.65    7.27
   1   7  -4  108.94    7.49
  -1  -7   3   22.14    3.72
   1   7  -3   26.60    4.46
   1   7  -2 1249.31   21.13
  -1  -7   2 1056.02   18.63
  -1  -7   1  788.03   16.24
   1   7  -1  841.33   17.20
   1   7   0 4875.99   40.13
  -1  -7   0 4858.79   37.69
  -1  -7  -1  159.79    8.18
   1   7   1  163.03    8.65
  -1  -7  -2  792.86   15.08
   1   7   2  829.12   15.87
   1   7   3   74.43    5.57
  -1  -7  -3   74.64    5.36
  -1  -7  -4   20.81    3.72
   1   7   4   25.59    4.30
   1   7   5 2853.30   28.61
  -1  -7  -5 2810.03   27.55
   1   7   6  199.93    8.02
  -1  -7  -6  189.36    7.80
   1   7   7  368.53   10.41
  -1  -7  -7  377.24   10.35
  -1  -7  -8  100.60    5.73
   1   7   8   99.54    6.00
  -1  -7  -9   56.70    7.22
   1   7   9   46.56    4.41
  -1  -7  -9   55.16    4.67
  -1  -7 -10  691.57   14.23
  -1  -7 -10  643.79   20.76
   1   7  10  714.61   14.49
   1   7  11  128.53    6.53
  -1  -7 -11  111.48    6.48
  -1  -7 -11  111.59    9.50
   1   7  12  148.06    7.17
  -1  -7 -12  150.98    7.01
  -1  -7 -12  152.57   11.10
  -1  -7 -13  370.60   17.73
  -1  -7 -13  405.75   11.79
   1   7  13  397.36   11.63
   1   7  14  326.22   10.83
  -1  -7 -14  313.75   16.62
  -1  -7 -14  314.17   10.78
  -1  -7 -15  116.90    7.17
   1   7  15  125.34    7.01
  -1  -7 -15  123.27   11.25
  -1  -7 -16    0.85    2.81
  -1  -7 -16    1.43    5.36
   1   7  16    0.90    2.76
   1   7  17    6.53    3.19
  -1  -7 -17    7.06    3.24
  -1  -7 -17    4.35    5.79
   1   7  18   32.81    4.46
  -1  -7 -18   26.70    4.30
  -1  -7 -18   25.54    7.80
  -1  -7 -19   66.94    6.11
   1   7  19   62.38    5.68
  -1  -7 -19   67.53   10.51
   1   7  20    2.65    3.34
  -1  -7 -20    2.07    3.56
  -1  -7 -20   10.99    8.33
  -1  -7 -21  232.90   17.94
  -1  -7 -21  235.87   11.41
   1   7  21  218.14   10.03
   1   7  22    9.72    3.93
  -1  -7 -22   21.02    9.77
  -1  -7 -22   11.04    4.30
   1   7  23   72.46    6.64
  -1  -7 -23   83.88   13.64
  -1  -7 -23   75.38    7.33
  -1  -7 -24   40.77   11.41
   1   7  24   31.69    4.99
  -1  -7 -24   34.77    5.89
   1   7  25   21.45    4.99
  -1  -7 -25   17.41    9.45
  -1  -7 -25   15.18    5.31
  -1  -7 -26   39.87   12.58
  -1  -7 -26   34.51    6.26
   1   7  26   30.31    5.63
   1   7  27    4.41    4.67
  -1  -7 -27    5.52    5.20
  -1  -7 -27   -8.92   11.20
  -1  -7 -28   41.41   12.85
   1   7  28   36.74    5.89
  -1  -7 -28   29.25    6.69
   1   7  29   29.25    6.00
  -1  -7 -29   22.14   11.84
  -1  -7 -29   33.82    7.49
  -1  -7 -30    1.65   12.79
  -1  -7 -30    1.96    5.89
   1   7  30   -2.12    4.88
   1   7  31   -7.01    5.52
  -1  -7 -31    3.40   12.42
  -1  -7 -31    9.24    6.80
  -1  -8  31   24.58    9.45
  -1  -8  30   10.41    8.44
  -1  -8  30    5.36    8.33
  -1  -8  29   47.62   10.19
  -1  -8  29   52.08   10.56
  -1  -8  28   22.72    9.72
  -1  -8  28    2.87    7.59
   1   8 -28   33.07   18.37
   1   8 -27   -5.84   15.82
  -1  -8  27    7.38    7.38
  -1  -8  27    5.15    6.90
  -1  -8  26    9.40    7.22
  -1  -8  26    7.80    6.80
   1   8 -26   19.48   14.65
  -1  -8  25   12.05   12.85
  -1  -8  25   10.09    6.95
  -1  -8  25   13.27    7.17
   1   8 -25   -1.59   12.90
  -1  -8  24  215.00   21.61
  -1  -8  24  228.38   15.18
   1   8 -24  213.04   23.89
  -1  -8  24  227.75   15.02
  -1  -8  23   68.11    9.45
  -1  -8  23   56.06    9.13
   1   8 -23   59.62   15.87
  -1  -8  23   74.16   14.02
   1   8 -22    7.22   11.10
  -1  -8  22   16.88   10.62
  -1  -8  22    8.55    5.73
  -1  -8  22   -3.45    6.53
   1   8 -21   64.82   15.29
  -1  -8  21   42.95    7.86
  -1  -8  21   49.16   12.79
  -1  -8  21   50.80    8.39
  -1  -8  20   44.54    7.43
  -1  -8  20   54.04    8.18
  -1  -8  20   52.98   11.84
  -1  -8  19   23.04    6.16
  -1  -8  19   13.01    9.08
  -1  -8  19   27.61    7.11
   1   8 -19   24.26   11.41
  -1  -8  18   24.31    6.05
   1   8 -18   35.36   12.26
  -1  -8  18   38.49    9.98
  -1  -8  18   21.34    6.37
   1   8 -17  104.10   15.77
  -1  -8  17   99.91   13.38
  -1  -8  17   90.78    9.13
  -1  -8  17   83.83    9.34
  -1  -8  16   26.76    6.53
  -1  -8  16   43.43   10.51
  -1  -8  16   28.67    6.16
  -1  -8  15  381.01   21.45
  -1  -8  15  398.37   16.03
  -1  -8  15  413.50   17.09
  -1  -8  14  552.64   19.48
  -1  -8  14  558.16   18.58
  -1  -8  14  549.03   24.90
  -1  -8  13   43.27    8.71
  -1  -8  13   51.49    7.27
  -1  -8  13   41.94    5.95
  -1  -8  12   55.58    9.77
  -1  -8  12   71.35    7.22
  -1  -8  12   75.33    7.86
  -1  -8  11  110.21   12.48
  -1  -8  11  115.73    8.49
   1   8 -10    1.70    4.51
  -1  -8  10    9.45    4.19
  -1  -8   9  206.19   10.46
   1   8  -9  189.15   10.94
   1   8  -8  225.04   11.57
  -1  -8   8  236.98   10.88
  -1  -8   8  265.65   17.63
  -1  -8   7  300.53   16.78
  -1  -8   7  339.60   12.58
   1   8  -7  338.38   13.32
  -1  -8   6   88.23    6.85
   1   8  -6   73.90    6.80
  -1  -8   5    4.25    3.24
   1   8  -5    7.38    4.30
  -1  -8   4   25.32    4.51
   1   8  -4   23.52    4.88
   1   8  -3   19.22    4.51
  -1  -8   3   21.61    4.25
  -1  -8   2   24.42    3.98
   1   8  -2   31.59    4.72
   1   8  -1  258.32   10.09
  -1  -8   1  325.85   11.10
  -1  -8   0   13.75    3.40
   1   8   0   15.77    3.98
  -1  -8  -1   79.68    5.73
   1   8   1   79.15    6.11
  -1  -8  -2   38.59    4.83
   1   8   2   33.60    5.15
  -1  -8  -3 2437.09   27.61
   1   8   3 2463.53   28.45
   1   8   4  286.46   10.14
  -1  -8  -4  283.38    9.72
  -1  -8  -5   16.62    3.40
   1   8   5    8.81    3.29
   1   8   6  172.22    7.86
  -1  -8  -6  176.20    7.64
   1   8   7  114.09    6.58
  -1  -8  -7  115.89    6.37
   1   8   8  165.79    7.86
  -1  -8  -8  165.90    7.70
   1   8   9  187.13    8.02
  -1  -8  -9  181.29    7.59
  -1  -8 -10   48.20    4.67
  -1  -8 -10   49.32    7.06
   1   8  10   51.44    4.88
  -1  -8 -11  624.58   14.23
   1   8  11  643.42   14.60
  -1  -8 -11  682.92   21.98
  -1  -8 -12    1.70    2.44
   1   8  12    3.72    2.71
  -1  -8 -12    6.58    5.04
   1   8  13   49.53    4.78
  -1  -8 -13   46.19    4.51
  -1  -8 -13   51.44    7.59
  -1  -8 -14   55.85    5.10
  -1  -8 -14   46.50    7.75
   1   8  14   52.93    4.72
   1   8  15   87.75    6.05
  -1  -8 -15   87.86    9.87
  -1  -8 -15   87.38    6.26
  -1  -8 -16   69.01    9.56
   1   8  16   70.66    5.57
  -1  -8 -16   70.55    5.84
  -1  -8 -17   83.14   10.62
   1   8  17   62.96    5.52
  -1  -8 -17   65.03    5.95
  -1  -8 -18   38.86    9.34
  -1  -8 -18   34.93    4.94
   1   8  18   30.53    4.57
   1   8  19   88.97    6.74
  -1  -8 -19   94.55   11.73
  -1  -8 -19   96.09    7.06
  -1  -8 -20   44.65    9.56
   1   8  20   39.44    5.10
  -1  -8 -20   43.74    5.73
   1   8  21   -2.12    3.40
  -1  -8 -21    5.95    7.49
  -1  -8 -21    1.27    4.09
  -1  -8 -22   30.90    5.31
   1   8  22   24.47    4.51
  -1  -8 -22   42.20   10.25
   1   8  23   12.58    3.72
  -1  -8 -23   25.54    5.41
  -1  -8 -23   16.14    8.55
  -1  -8 -24   45.55   12.05
   1   8  24   54.04    6.58
  -1  -8 -24   49.42    6.53
  -1  -8 -25   11.57    4.88
  -1  -8 -25   12.58   10.09
   1   8  25   17.78    4.94
  -1  -8 -26    3.40    9.13
   1   8  26    0.80    4.30
  -1  -8 -26   -3.03    5.15
  -1  -8 -27   21.93    6.16
  -1  -8 -27   22.08   11.10
   1   8  27   25.54    5.31
   1   8  28    3.45    4.83
  -1  -8 -28   15.29   12.26
  -1  -8 -28    0.64    5.15
  -1  -8 -29    6.26   11.89
  -1  -8 -29   -0.96    5.52
   1   8  29    2.92    5.04
  -1  -8 -30    7.59    6.37
   1   8  30   11.04    5.89
  -1  -8 -30    3.24   11.84
  -1  -8 -31   -0.21    6.26
  -1  -8 -31  -10.14   13.22
   1   8  31   -2.39    5.47
  -1  -9  31   10.88    9.66
  -1  -9  30    2.60    8.44
  -1  -9  29    4.09    8.23
  -1  -9  29   10.03    8.55
  -1  -9  28   20.12    9.18
  -1  -9  28   25.48    9.87
  -1  -9  27   15.13    7.80
  -1  -9  27   30.42    9.40
  -1  -9  26    2.76    7.59
  -1  -9  26   22.40    8.39
  -1  -9  25   22.30    7.91
  -1  -9  25   31.37    8.81
  -1  -9  24  -16.93   12.26
  -1  -9  24    3.13    7.59
  -1  -9  24   -3.88    6.58
  -1  -9  23   10.83    6.74
  -1  -9  23   17.15    7.64
  -1  -9  23   17.15   12.21
  -1  -9  22   16.14    6.90
  -1  -9  22   18.85    6.95
  -1  -9  22   30.10   12.32
  -1  -9  21    7.06    5.89
  -1  -9  21   25.43   11.52
  -1  -9  21   11.25    5.84
  -1  -9  20  139.36   11.63
  -1  -9  20  141.74   12.21
  -1  -9  20  150.56   17.09
  -1  -9  19    1.43    9.08
  -1  -9  19    2.65    5.57
  -1  -9  19   -4.83    5.89
  -1  -9  18    8.49    6.26
  -1  -9  18    5.04    5.84
  -1  -9  18    0.11    8.44
  -1  -9  17   12.85    8.76
  -1  -9  17   10.35    5.63
  -1  -9  17    6.74    5.31
  -1  -9  16  153.74   11.20
  -1  -9  16  150.34   11.52
  -1  -9  16  153.95   15.02
  -1  -9  15  225.78   12.79
  -1  -9  15  213.36   13.32
  -1  -9  14   -4.19    7.54
  -1  -9  14    3.03    4.88
  -1  -9  14    0.11    5.47
  -1  -9  13   27.92    8.76
  -1  -9  13   17.57    5.63
  -1  -9  13   32.91    6.64
  -1  -9  12  163.24   10.67
  -1  -9  12  167.07   15.45
  -1  -9  11  473.01   24.00
   1   9 -11  435.48   17.47
  -1  -9  11  451.83   16.46
  -1  -9  10   15.34    4.72
   1   9 -10   11.63    5.04
  -1  -9  10   25.96    8.97
  -1  -9   9 1013.50   32.65
  -1  -9   9  984.93   22.77
   1   9  -9 1024.80   25.27
   1   9  -8  167.28   10.51
  -1  -9   8  158.68   13.75
  -1  -9   8  152.63    9.24
  -1  -9   7  587.36   17.25
   1   9  -7  559.12   17.47
  -1  -9   7  620.54   23.84
  -1  -9   6    4.03    3.56
   1   9  -6    9.98    4.41
  -1  -9   6    4.99    6.69
  -1  -9   5  173.92    9.24
   1   9  -5  167.17    9.72
   1   9  -4   89.19    7.17
  -1  -9   4   88.07    6.85
   1   9  -3  308.23   12.10
  -1  -9   3  306.26   11.52
  -1  -9   2   19.59    4.25
   1   9  -2   22.03    4.30
   1   9  -1   61.16    5.89
  -1  -9   1   59.67    5.68
   1   9   0  500.09   14.49
  -1  -9   0  462.07   13.27
   1   9   1  190.80    9.18
  -1  -9  -1  210.01    9.02
  -1  -9  -2    6.05    3.19
   1   9   2    0.90    3.34
   1   9   3 1409.79   22.93
  -1  -9  -3 1394.24   22.24
  -1  -9  -4  101.40    6.37
   1   9   4   92.90    6.48
   1   9   5   98.53    6.48
  -1  -9  -5  101.34    6.42
  -1  -9  -6  297.34   10.14
   1   9   6  303.24   10.72
   1   9   7  132.08    7.27
  -1  -9  -7  141.37    7.17
   1   9   8  958.66   18.37
  -1  -9  -8  920.33   17.52
  -1  -9  -9    8.23    2.92
   1   9   9    6.64    3.13
  -1  -9 -10  502.63   13.06
  -1  -9 -10  497.70   18.69
   1   9  10  508.05   13.48
   1   9  11   -0.53    2.71
  -1  -9 -11   -1.59    2.97
  -1  -9 -11    0.32    4.78
  -1  -9 -12   75.33    8.49
  -1  -9 -12   83.67    5.89
   1   9  12   81.12    6.05
  -1  -9 -13   71.83    5.79
  -1  -9 -13   75.76    8.65
   1   9  13   71.83    5.79
   1   9  14    2.18    2.92
  -1  -9 -14    4.41    5.31
  -1  -9 -14    2.28    2.76
   1   9  15  127.46    7.38
  -1  -9 -15  125.45   11.63
  -1  -9 -15  130.97    7.43
   1   9  16   11.79    3.34
  -1  -9 -16   15.40    6.58
  -1  -9 -16   10.88    3.45
  -1  -9 -17   81.33   10.62
   1   9  17   88.13    6.64
  -1  -9 -17  107.61    7.27
   1   9  18   12.69    3.88
  -1  -9 -18   16.67    4.03
   1   9  19  107.82    7.49
  -1  -9 -19  112.60    7.64
  -1  -9 -19  115.78   12.63
  -1  -9 -20   -3.13    4.14
   1   9  20   -1.70    3.40
  -1  -9 -20   -5.36    7.49
  -1  -9 -21    4.25    7.43
   1   9  21   10.19    3.98
  -1  -9 -21   -0.11    3.93
   1   9  22   90.51    7.11
  -1  -9 -22   81.06    7.27
  -1  -9 -22   86.85   12.48
  -1  -9 -23   87.33    7.86
   1   9  23  100.12    7.64
  -1  -9 -23  102.03   13.86
  -1  -9 -24    7.22    8.76
  -1  -9 -24    0.21    4.41
   1   9  24    1.49    4.03
  -1  -9 -25   92.90   14.97
   1   9  25   94.55    8.02
  -1  -9 -25   89.03    8.44
   1   9  26    7.96    5.04
  -1  -9 -26    0.58    5.52
  -1  -9 -27   34.08    6.48
  -1  -9 -27   33.39   11.15
   1   9  27   38.22    6.21
  -1  -9 -28    1.06   10.09
   1   9  28    0.53    4.57
  -1  -9 -28    9.08    6.05
   1   9  29    5.36    5.31
  -1  -9 -29   -3.93   11.15
  -1  -9 -29    1.59    5.52
  -1  -9 -30   37.32   15.40
   1   9  30   15.66    5.36
  -1  -9 -30   24.31    6.90
  -1  -9 -31   30.58   15.45
  -1 -10  31   17.09   11.20
  -1 -10  30   -4.78    9.08
  -1 -10  29   17.63    9.02
  -1 -10  28   42.74   10.41
  -1 -10  28   49.85   10.41
  -1 -10  27   94.87   12.90
  -1 -10  27   77.61   11.84
  -1 -10  26   62.75   10.78
  -1 -10  26   83.98   11.89
  -1 -10  25   19.96    9.02
  -1 -10  25    5.63    7.11
  -1 -10  24   92.21   12.10
  -1 -10  24  102.09   12.00
  -1 -10  23    6.26    6.74
  -1 -10  23    9.02    7.11
  -1 -10  23   12.69   10.72
  -1 -10  22   16.03    7.27
  -1 -10  22   -5.36   11.36
  -1 -10  22   18.63    7.70
  -1 -10  21   40.03   13.27
  -1 -10  21   53.19    8.71
  -1 -10  21   54.47    9.56
  -1 -10  20  115.89   16.83
  -1 -10  20  109.57   11.36
  -1 -10  20  122.21   11.25
  -1 -10  19   41.46    8.49
  -1 -10  19   59.72    8.55
  -1 -10  19   28.30   11.57
  -1 -10  18   64.02    9.18
  -1 -10  18   80.43    9.77
  -1 -10  18   73.53   13.59
  -1 -10  17   48.15    7.75
  -1 -10  17   38.59    7.86
  -1 -10  16   34.14    7.06
  -1 -10  16   36.10   11.31
  -1 -10  16   32.97    7.59
  -1 -10  15  213.62   17.36
  -1 -10  15  222.28   13.43
  -1 -10  15  218.93   14.12
  -1 -10  14   13.06    5.68
  -1 -10  14   11.52    5.89
  -1 -10  13   20.54    5.84
  -1 -10  13   22.14    6.11
  -1 -10  12  404.47   16.62
  -1 -10  12  417.00   24.53
  -1 -10  11   61.05    7.38
  -1 -10  11   66.36   12.37
   1  10 -11   57.18    7.86
   1  10 -10  211.55   13.11
  -1 -10  10  210.81   11.57
  -1 -10  10  194.73   16.78
  -1 -10   9   23.04    8.23
   1  10  -9   43.53    7.01
  -1 -10   9   40.67    6.11
  -1 -10   8   -6.00    6.74
  -1 -10   8    1.11    4.14
   1  10  -7   -4.72    4.78
  -1 -10   7   16.40    4.78
  -1 -10   7   10.56    7.22
   1  10  -6  123.48    9.45
  -1 -10   6  144.98    9.40
   1  10  -5  469.40   16.56
  -1 -10   5  492.39   16.03
  -1 -10   4  471.26   15.40
   1  10  -4  459.95   16.03
   1  10  -3  369.54   14.07
  -1 -10   3  309.24   12.32
  -1 -10   2   39.44    5.36
   1  10  -2   39.02    5.68
  -1 -10   1   16.40    4.19
   1  10  -1   13.11    4.35
   1  10   0   59.03    6.21
  -1 -10   0   50.59    5.52
   1  10   1   56.06    6.16
  -1 -10  -1   56.01    5.68
   1  10   2   70.02    6.26
  -1 -10  -2   70.61    6.05
  -1 -10  -3   11.36    4.14
   1  10   3   22.19    4.99
  -1 -10  -4 2900.71   33.66
   1  10   4 2949.60   35.14
  -1 -10  -5  253.55   10.30
   1  10   5  260.50   10.78
   1  10   6   11.68    3.98
  -1 -10  -6   10.30    3.50
   1  10   7  588.16   15.66
  -1 -10  -7  614.33   15.40
  -1 -10  -8    4.30    2.87
   1  10   8    3.40    3.08
  -1 -10  -9    0.64    2.81
   1  10   9   -2.65    3.13
  -1 -10 -10   35.14    4.51
   1  10  10   36.05    4.83
  -1 -10 -11   23.36    6.32
   1  10  11   22.14    4.41
  -1 -10 -11   21.45    3.93
  -1 -10 -12  120.56    7.38
  -1 -10 -12  106.12   10.78
   1  10  12  102.88    7.17
  -1 -10 -13  185.38    8.92
   1  10  13  187.98    9.45
  -1 -10 -13  181.03   13.54
  -1 -10 -14  294.74   17.31
  -1 -10 -14  300.37   11.41
   1  10  14  304.62   11.57
  -1 -10 -15    9.61    6.05
   1  10  15    7.17    3.29
  -1 -10 -15    1.86    3.19
   1  10  16  177.37    9.24
  -1 -10 -16  183.42   14.65
  -1 -10 -16  186.66    9.34
  -1 -10 -17   78.99    6.58
  -1 -10 -17   94.44   11.79
   1  10  17   89.08    6.90
  -1 -10 -18    3.08    6.85
   1  10  18    6.26    3.56
  -1 -10 -18   10.67    4.03
  -1 -10 -19    4.83    3.77
  -1 -10 -19    9.56    8.18
   1  10  19    3.82    3.82
  -1 -10 -20   62.43   10.46
  -1 -10 -20   51.28    6.00
   1  10  20   57.18    6.32
  -1 -10 -21    7.86    8.23
  -1 -10 -21   -1.43    3.88
   1  10  21   -2.97    3.88
  -1 -10 -22   61.10    7.06
   1  10  22   59.46    6.58
  -1 -10 -22   63.76   12.32
  -1 -10 -23   -1.01    4.25
  -1 -10 -23    0.48    8.44
   1  10  23    0.48    4.35
  -1 -10 -24  167.44   18.37
   1  10  24  145.94    9.66
  -1 -10 -24  161.33   10.51
   1  10  25   33.76    5.89
  -1 -10 -25   37.11   11.94
  -1 -10 -25   46.56    7.06
  -1 -10 -26   68.01   14.44
  -1 -10 -26   69.23    8.02
   1  10  26   66.89    7.38
  -1 -10 -27    4.78    5.84
   1  10  27    3.34    4.51
  -1 -10 -28    7.96    5.95
   1  10  28    3.93    5.10
  -1 -10 -28   -6.74   12.37
  -1 -10 -29   13.80    6.74
   1  10  29    7.91    5.84
  -1 -10 -29    8.23   12.21
   1  10  30    7.01    5.84
  -1 -10 -30    7.59   12.63
  -1 -10 -30   13.80    6.64
  -1 -11  30   16.72    9.93
  -1 -11  29   24.85   10.62
  -1 -11  28   73.00   12.48
  -1 -11  27   15.24   10.35
  -1 -11  27    0.21    8.23
  -1 -11  26   13.86    8.71
  -1 -11  26   17.63    9.98
  -1 -11  25   20.44    9.50
  -1 -11  25   25.16    8.28
  -1 -11  24   92.21   12.10
  -1 -11  24   58.24   11.10
  -1 -11  23   23.46    9.08
  -1 -11  23   17.68    8.55
  -1 -11  22   17.94   12.37
  -1 -11  22    2.81    7.70
  -1 -11  22   14.33    7.43
  -1 -11  21   64.66   14.55
  -1 -11  21   90.41   11.79
  -1 -11  21   93.49   11.10
  -1 -11  20    4.67    6.48
  -1 -11  20   -8.07   11.04
  -1 -11  20   20.65    7.43
  -1 -11  19    2.97    6.32
  -1 -11  19    7.91    6.05
  -1 -11  19   -3.93    9.50
  -1 -11  18  184.21   13.64
  -1 -11  18  176.52   14.23
  -1 -11  18  168.82   19.16
  -1 -11  17  785.33   25.80
  -1 -11  17  827.42   36.42
  -1 -11  17  753.74   26.70
  -1 -11  16  242.24   14.86
  -1 -11  16  248.45   15.93
  -1 -11  16  238.04   19.91
  -1 -11  15  238.10   14.33
  -1 -11  15  246.91   19.80
  -1 -11  15  235.34   15.08
  -1 -11  14   28.99    7.11
  -1 -11  14   25.11   10.25
  -1 -11  14   17.73    6.53
  -1 -11  13  109.47   10.19
  -1 -11  13  107.40   10.94
  -1 -11  12   32.17    6.80
  -1 -11  12  108.51   17.57
  -1 -11  11   35.99   10.72
   1  11 -11   25.32    6.42
  -1 -11  11   27.29    6.11
  -1 -11  10    9.13    9.08
   1  11 -10   -0.80    5.26
  -1 -11  10    5.84    4.78
  -1 -11   9   -1.11    4.30
  -1 -11   9    5.63    7.96
   1  11  -9   -1.17    5.04
   1  11  -8   32.06    6.58
  -1 -11   8   28.14    5.73
  -1 -11   8   19.54    7.54
  -1 -11   7  269.10   18.53
  -1 -11   7  294.32   13.75
   1  11  -7  300.90   14.92
  -1 -11   6    0.64    7.75
   1  11  -6    7.80    4.83
  -1 -11   6    2.44    4.14
   1  11  -5   57.18    7.70
  -1 -11   5   51.97    6.37
  -1 -11   4   20.65    4.94
   1  11  -4   18.10    4.88
  -1 -11   3   51.44    6.37
   1  11  -3   49.42    6.58
   1  11  -2   12.58    4.88
  -1 -11   2   11.89    4.72
   1  11  -1  100.28    8.28
  -1 -11   1   86.48    7.49
   1  11   0   36.15    5.84
  -1 -11   0   34.35    5.20
   1  11   1 1047.21   23.46
  -1 -11  -1 1023.16   21.71
   1  11   2    6.48    3.98
  -1 -11  -2    9.66    3.56
   1  11   3   71.77    7.01
  -1 -11  -3   77.24    7.01
   1  11   4  168.98    9.66
  -1 -11  -4  158.52    8.97
  -1 -11  -5  982.07   20.81
   1  11   5 1028.25   22.19
  -1 -11  -6  117.59    7.80
   1  11   6  139.46    8.76
   1  11   7  394.87   13.91
  -1 -11  -7  386.21   13.06
   1  11   8  482.57   15.29
  -1 -11  -8  467.28   14.65
  -1 -11  -9   67.37    6.26
   1  11   9   70.39    6.90
  -1 -11 -10   25.16    4.46
   1  11  10   22.51    4.62
   1  11  11   36.47    5.47
  -1 -11 -11   27.29    4.41
   1  11  12    2.28    3.40
  -1 -11 -12    4.99    3.40
  -1 -11 -12    2.97    5.36
  -1 -11 -13   22.88    4.72
   1  11  13   23.25    5.10
  -1 -11 -13   25.80    7.80
  -1 -11 -14  123.59   12.69
   1  11  14  137.92    8.76
  -1 -11 -14  133.09    8.33
  -1 -11 -15   24.26    8.02
  -1 -11 -15   18.26    4.25
   1  11  15   17.15    4.41
   1  11  16  129.43    8.60
  -1 -11 -16  133.83   13.32
  -1 -11 -16  126.67    8.23
  -1 -11 -17    5.73    6.90
   1  11  17    7.22    4.14
  -1 -11 -17    7.06    3.88
  -1 -11 -18  294.05   12.48
  -1 -11 -18  299.25   20.07
   1  11  18  305.09   12.69
   1  11  19    4.35    4.03
  -1 -11 -19    3.50    3.72
  -1 -11 -19    5.89    7.43
  -1 -11 -20  173.01   16.30
  -1 -11 -20  185.01   10.25
   1  11  20  191.17   10.56
  -1 -11 -21   24.10    5.36
   1  11  21   16.46    4.83
  -1 -11 -21   23.41    9.93
  -1 -11 -22   31.16   10.41
   1  11  22   39.92    6.16
  -1 -11 -22   40.40    6.26
  -1 -11 -23    2.44    4.46
  -1 -11 -23   -2.34    9.13
   1  11  23    1.80    4.30
  -1 -11 -24   73.53    7.75
  -1 -11 -24   89.08   14.81
   1  11  24   83.72    8.12
  -1 -11 -25   22.77   11.04
  -1 -11 -25   12.79    5.36
   1  11  25   17.84    5.20
   1  11  26    2.02    4.67
  -1 -11 -26    7.64   10.09
  -1 -11 -26    5.31    5.73
   1  11  27   32.54    6.85
  -1 -11 -27   17.36   11.52
  -1 -11 -27   37.06    7.59
   1  11  28   58.66    7.80
  -1 -11 -28   45.66   15.18
  -1 -11 -28   46.40    7.80
  -1 -11 -29   56.64   16.62
   1  11  29   48.84    7.54
  -1 -11 -29   54.10    8.12
  -1 -11 -30   10.83    7.11
  -1 -11 -30   16.72   14.12
   1  11  30   28.35    7.43
  -1 -12  30    7.06    8.39
  -1 -12  29  -10.30    9.08
  -1 -12  28   62.32   12.16
  -1 -12  27   -1.91    9.13
  -1 -12  26   21.93    9.98
  -1 -12  25    3.29    8.33
  -1 -12  25   34.51   10.30
  -1 -12  24    8.92    8.81
  -1 -12  24    6.37    8.07
  -1 -12  23   -1.43    7.86
  -1 -12  23    6.90    7.86
  -1 -12  22   67.10   11.36
  -1 -12  22   79.63   11.10
  -1 -12  21    6.64   11.47
  -1 -12  21    1.11    7.33
  -1 -12  21    3.24    7.33
  -1 -12  20    6.58    6.74
  -1 -12  20    5.89    7.86
  -1 -12  20    5.41   10.99
  -1 -12  19    3.19    6.85
  -1 -12  19   -5.68   11.10
  -1 -12  19    8.81    7.22
  -1 -12  18    6.11    7.75
  -1 -12  18   -0.90    6.48
  -1 -12  18   18.05   11.57
  -1 -12  17   21.39    6.80
  -1 -12  17   29.25    8.28
  -1 -12  17   32.54   12.42
  -1 -12  16    5.36    5.84
  -1 -12  16    9.45   10.62
  -1 -12  16   -2.92    6.37
  -1 -12  15   18.10    9.72
  -1 -12  15   38.44    8.76
  -1 -12  15   36.68    7.80
  -1 -12  14   13.80    6.90
  -1 -12  14    8.97    6.21
  -1 -12  14    4.30    9.61
  -1 -12  13   28.45    7.22
  -1 -12  13   40.72   12.26
  -1 -12  12  161.86   12.10
   1  12 -12  158.63   13.06
  -1 -12  12  152.73   17.73
  -1 -12  11    1.38    4.83
   1  12 -11    4.41    6.00
   1  12 -10   53.14    8.60
  -1 -12  10   61.63    8.23
  -1 -12  10   32.17   11.04
  -1 -12   9  150.03   16.19
   1  12  -9  147.05   12.10
  -1 -12   9  169.77   11.73
  -1 -12   8    8.55    5.15
   1  12  -8    3.40    5.68
  -1 -12   8   -4.25    8.18
  -1 -12   7   23.36    9.87
   1  12  -7   11.41    5.36
  -1 -12   7   16.30    5.31
  -1 -12   6   23.41    9.24
  -1 -12   6   17.73    5.15
   1  12  -6   13.75    5.15
  -1 -12   5   95.50    8.49
   1  12  -5   89.29    8.81
   1  12  -4    8.18    5.10
  -1 -12   4   11.41    4.51
  -1 -12   3    6.05    3.88
   1  12  -3    6.05    4.57
  -1 -12   2   13.17    4.51
   1  12  -2   15.29    5.04
  -1 -12   1   42.20    5.84
   1  12  -1   36.21    6.26
   1  12   0   59.72    7.01
  -1 -12   0   58.34    6.58
  -1 -12  -1    5.15    3.56
   1  12   1    3.88    4.03
   1  12   2    5.20    4.46
  -1 -12  -2    6.95    3.93
  -1 -12  -3  117.75    8.39
   1  12   3  111.38    8.49
  -1 -12  -4  112.97    8.12
   1  12   4  125.39    8.92
   1  12   5   96.83    8.18
  -1 -12  -5   86.96    7.22
  -1 -12  -6   70.08    6.53
   1  12   6   71.30    7.06
  -1 -12  -7  355.00   12.95
   1  12   7  369.49   13.96
  -1 -12  -8  225.68   10.72
   1  12   8  238.36   11.36
   1  12   9  302.60   12.69
  -1 -12  -9  262.04   11.57
   1  12  10    1.91    3.61
  -1 -12 -10    6.53    3.66
  -1 -12 -11  235.23   10.72
   1  12  11  243.67   11.52
  -1 -12 -12   -1.70    5.68
   1  12  12    2.55    3.98
  -1 -12 -12   -0.69    3.29
  -1 -12 -13  118.92    8.12
   1  12  13  117.96    8.44
   1  12  14   97.20    7.86
  -1 -12 -14  100.87    7.70
  -1 -12 -14  100.28   11.31
   1  12  15  100.76    7.80
  -1 -12 -15  107.61    7.86
  -1 -12 -15  105.38   12.53
   1  12  16  299.04   13.06
  -1 -12 -16  294.32   12.37
  -1 -12 -16  309.77   19.64
  -1 -12 -17    8.28    4.19
   1  12  17   10.94    5.04
   1  12  18    7.96    4.78
  -1 -12 -18    8.44    8.28
  -1 -12 -18    6.85    4.46
  -1 -12 -19    0.74    3.98
  -1 -12 -19    7.54    7.80
   1  12  19    0.42    4.19
  -1 -12 -20  354.25   22.83
   1  12  20  354.57   14.33
  -1 -12 -20  355.16   14.44
  -1 -12 -21   85.74    8.02
   1  12  21   95.61    8.28
  -1 -12 -21   98.27   14.23
  -1 -12 -22   98.48   14.23
  -1 -12 -22   82.66    8.02
   1  12  22   82.34    7.86
   1  12  23   11.31    4.94
  -1 -12 -23   26.97    9.98
  -1 -12 -23   17.73    5.57
   1  12  24   10.03    4.94
  -1 -12 -24   19.96    5.52
  -1 -12 -24    9.72   11.10
  -1 -12 -25   -5.15    5.47
   1  12  25    3.50    5.26
  -1 -12 -25   -2.55   10.03
   1  12  26    8.71    5.63
  -1 -12 -26   12.79   12.00
  -1 -12 -26    9.29    5.68
  -1 -12 -27    3.98   11.79
   1  12  27   19.16    6.32
  -1 -12 -27   20.44    6.85
  -1 -12 -28    2.44   11.79
   1  12  28   -2.50    5.89
  -1 -12 -28    6.05    6.64
   1  12  29   -0.58    6.05
  -1 -12 -29   -3.93   13.59
  -1 -12 -29   14.92    7.06
  -1 -13  28    0.74    9.18
  -1 -13  27    1.06    9.29
  -1 -13  26   -0.74    9.34
  -1 -13  25   18.16   10.09
  -1 -13  24   -1.65    8.55
  -1 -13  23   84.89   13.43
  -1 -13  23   85.68   12.53
  -1 -13  22   62.17   11.31
  -1 -13  22   69.12   11.68
  -1 -13  21   12.26    8.60
  -1 -13  21   -6.11    8.12
  -1 -13  20   52.45   10.14
  -1 -13  20   73.58   12.53
  -1 -13  20   55.37   13.86
  -1 -13  19   65.88   15.71
  -1 -13  19   55.74    9.93
  -1 -13  19   46.77   10.09
  -1 -13  18    6.37    7.59
  -1 -13  18   15.98   11.79
  -1 -13  18    6.26    6.74
  -1 -13  17  116.74   12.05
  -1 -13  17  103.95   12.21
  -1 -13  17  104.64   15.82
  -1 -13  16  565.75   30.84
  -1 -13  16  614.65   23.94
  -1 -13  16  604.03   25.32
  -1 -13  15  435.00   20.12
  -1 -13  15  412.01   21.13
  -1 -13  15  396.56   26.70
  -1 -13  14    0.74    6.58
  -1 -13  14   10.25    6.05
  -1 -13  13  122.21   17.31
  -1 -13  13  146.73   11.84
  -1 -13  12   51.71    8.02
  -1 -13  12   30.84   12.05
   1  13 -12   45.28    9.08
  -1 -13  11    4.46    9.66
  -1 -13  11    1.27    5.52
   1  13 -11    6.16    6.48
  -1 -13  10   18.85    6.00
  -1 -13  10   -1.22    9.93
   1  13 -10   18.10    7.38
  -1 -13   9   60.04   12.90
  -1 -13   9   89.51    9.13
   1  13  -9   74.32    9.87
   1  13  -8   16.14    6.58
  -1 -13   8    4.25    8.92
  -1 -13   8   10.56    5.41
  -1 -13   7    5.95    4.94
   1  13  -7    7.86    5.73
  -1 -13   7    6.48    8.92
   1  13  -6    7.43    5.26
  -1 -13   6   10.19    5.04
  -1 -13   5   19.11    5.26
   1  13  -5   12.32    5.84
  -1 -13   4   34.93    6.26
   1  13  -4   37.69    7.01
  -1 -13   3   20.23    5.31
   1  13  -3   26.65    5.95
  -1 -13   2   34.98    5.73
   1  13  -2   46.82    7.11
   1  13  -1   18.95    5.57
  -1 -13   1   10.46    4.51
  -1 -13   0   28.56    5.41
   1  13   0   33.13    5.95
  -1 -13  -1   48.47    6.11
   1  13   1   92.64    9.72
  -1 -13  -2   68.11    6.85
   1  13   2   68.38    7.64
   1  13   3    7.22    4.57
  -1 -13  -3    8.28    4.09
  -1 -13  -4    9.50    3.88
   1  13   4    4.35    3.98
  -1 -13  -5   86.37    7.38
   1  13   5   71.77    7.64
   1  13   6  121.31    8.92
  -1 -13  -6  114.46    8.33
  -1 -13  -7  199.18   10.35
   1  13   7  203.27   11.25
  -1 -13  -8   30.47    4.88
   1  13   8   32.28    5.63
  -1 -13  -9   29.46    4.99
   1  13   9   24.69    5.10
   1  13  10    6.95    4.25
  -1 -13 -10    6.80    3.66
   1  13  11   95.66    8.02
  -1 -13 -11  105.49    8.02
  -1 -13 -12  126.40    8.49
   1  13  12  126.51    9.13
  -1 -13 -13   57.44    6.11
   1  13  13   55.48    7.06
  -1 -13 -13   64.61    9.98
   1  13  14   27.50    5.41
  -1 -13 -14   32.01    5.57
  -1 -13 -14   18.63    7.22
   1  13  15   86.90    7.59
  -1 -13 -15   84.52    7.33
  -1 -13 -15   82.71   11.20
  -1 -13 -16   90.46    7.49
  -1 -13 -16  101.61   12.58
   1  13  16   89.61    7.96
  -1 -13 -17   17.68    4.94
  -1 -13 -17   23.20    9.29
   1  13  17   23.57    5.36
  -1 -13 -18  344.27   21.98
   1  13  18  342.10   14.17
  -1 -13 -18  329.78   13.59
  -1 -13 -19  336.63   22.35
   1  13  19  311.41   13.64
  -1 -13 -19  332.59   14.02
  -1 -13 -20   62.80   12.48
  -1 -13 -20   48.52    6.48
   1  13  20   45.66    6.69
  -1 -13 -21  189.79   18.10
   1  13  21  183.68   11.15
  -1 -13 -21  191.38   11.31
  -1 -13 -22    6.90    4.83
   1  13  22   10.94    5.26
  -1 -13 -22   -1.70    8.87
  -1 -13 -23   -3.40    8.97
  -1 -13 -23   -2.44    4.62
   1  13  23    3.19    4.88
  -1 -13 -24  100.44    9.02
   1  13  24   90.14    9.08
  -1 -13 -24   94.92   14.86
   1  13  25   12.00    5.84
  -1 -13 -25   10.14   11.73
  -1 -13 -25    7.80    5.68
  -1 -13 -26    0.48    5.31
   1  13  26  -10.03    6.16
  -1 -13 -26    7.33   12.26
   1  13  27   14.86    6.58
  -1 -13 -27   15.50    7.27
  -1 -13 -28    4.67   12.37
  -1 -13 -28    7.27    6.74
   1  13  28   -2.12    5.95
  -1 -14  27    8.65    9.77
  -1 -14  26  213.52   18.21
  -1 -14  25    0.90    9.50
  -1 -14  24   -6.21    8.76
  -1 -14  23   35.78   10.51
  -1 -14  22   11.63    9.02
  -1 -14  21   33.02   10.09
  -1 -14  21   19.64    8.71
  -1 -14  20   -3.34    8.28
  -1 -14  20   -0.58    7.49
  -1 -14  19   22.14    9.45
  -1 -14  19   19.43   13.48
  -1 -14  19   24.05    8.44
  -1 -14  18   -3.45    7.49
  -1 -14  18   -3.82   12.48
  -1 -14  18    6.42    7.75
  -1 -14  17   26.65   12.63
  -1 -14  17   27.92    9.40
  -1 -14  17   34.83    8.07
  -1 -14  16  138.40   18.53
  -1 -14  16  137.87   13.06
  -1 -14  16  115.25   13.22
  -1 -14  15    5.04    6.69
  -1 -14  15   18.26   12.48
  -1 -14  15   12.10    7.43
  -1 -14  14   67.42   10.72
  -1 -14  14   82.87   10.19
  -1 -14  14   91.10   17.36
  -1 -14  13   83.29   18.26
  -1 -14  13   65.78    9.45
   1  14 -12  105.49   11.89
  -1 -14  12  113.24   10.99
  -1 -14  11   36.31   12.26
  -1 -14  11   48.68    8.12
   1  14 -11   28.24    8.07
  -1 -14  10   51.55   13.06
   1  14 -10   75.81   10.83
  -1 -14  10   68.85    8.65
  -1 -14   9    5.52    9.24
  -1 -14   9    9.29    5.57
   1  14  -9   13.32    7.01
  -1 -14   8  -10.25    9.40
  -1 -14   8    2.39    5.10
  -1 -14   7  -12.26   10.41
   1  14  -7   -5.41    6.53
  -1 -14   7    7.54    5.31
   1  14  -6   12.63    6.11
  -1 -14   6   10.94    5.31
  -1 -14   5   21.98    5.95
   1  14  -5   23.36    6.69
   1  14  -4    1.54    5.36
  -1 -14   4    1.75    4.62
  -1 -14   3   83.08    8.28
   1  14  -3   97.58    9.56
   1  14  -2   66.41    8.33
  -1 -14   2   58.29    6.95
  -1 -14   1    6.26    4.46
   1  14  -1   13.01    5.52
  -1 -14   0   43.21    6.37
   1  14   0   55.21    7.59
   1  14   1    7.43    5.41
  -1 -14  -1    2.55    4.19
  -1 -14  -2    4.41    4.51
   1  14   2    4.99    4.83
  -1 -14  -3    8.81    4.46
   1  14   3    1.49    4.35
   1  14   4    2.55    4.41
  -1 -14  -4    4.99    4.57
  -1 -14  -5 1266.83   26.49
   1  14   5 1356.65   29.41
  -1 -14  -6   23.73    4.99
   1  14   6   27.45    6.11
   1  14   7  117.85    9.45
  -1 -14  -7  112.33    8.49
  -1 -14  -8  184.00   10.72
   1  14   8  193.29   11.47
  -1 -14  -9    1.06    3.88
   1  14   9   -0.11    4.30
   1  14  10   64.93    7.49
  -1 -14 -10   53.78    6.21
   1  14  11  135.37    9.93
  -1 -14 -11  129.43    9.13
  -1 -14 -12  368.48   14.39
   1  14  12  359.51   14.97
  -1 -14 -13  312.31   13.48
   1  14  13  302.07   14.02
   1  14  14   22.72    5.79
  -1 -14 -14   18.00    5.04
  -1 -14 -14   14.92    7.54
   1  14  15  115.78    9.50
  -1 -14 -15  110.00    8.81
  -1 -14 -15  109.31   13.54
   1  14  16    9.34    5.15
  -1 -14 -16    0.48    4.35
  -1 -14 -16    7.96    7.80
  -1 -14 -17   49.32    6.53
   1  14  17   52.45    7.38
  -1 -14 -17   59.19   11.52
  -1 -14 -18    2.28    4.51
  -1 -14 -18    0.05    7.91
   1  14  18    2.12    4.94
  -1 -14 -19   40.35   11.04
  -1 -14 -19   54.36    7.11
   1  14  19   50.70    7.43
  -1 -14 -20  107.82    9.24
  -1 -14 -20  125.13   15.61
   1  14  20  108.40    9.61
   1  14  21    6.11    5.57
  -1 -14 -21    9.24    9.61
  -1 -14 -21    1.38    4.51
  -1 -14 -22    8.07    5.47
   1  14  22    4.25    5.26
  -1 -14 -22   13.11   11.63
  -1 -14 -23    3.66    4.78
  -1 -14 -23    7.22    9.82
   1  14  23   -4.30    5.47
  -1 -14 -24   18.53   11.84
   1  14  24   12.85    5.52
  -1 -14 -24   12.90    5.41
  -1 -14 -25   15.29   11.94
   1  14  25    0.96    5.57
  -1 -14 -25   11.79    6.21
  -1 -14 -26   13.17   12.85
  -1 -14 -26   -4.30    5.68
   1  14  26   -2.12    5.73
  -1 -14 -27   39.60    7.64
  -1 -14 -27   43.43   14.28
   1  14  27   36.95    7.49
  -1 -14 -28   16.62   13.32
   1  14  28   17.04    7.11
  -1 -14 -28    9.72    6.58
  -1 -15  25   30.79   11.36
  -1 -15  24    4.57    9.66
  -1 -15  23   25.59   10.35
  -1 -15  22   22.03    9.56
  -1 -15  21    5.57    8.28
  -1 -15  20    2.81    8.28
  -1 -15  19   79.15   13.01
  -1 -15  19   75.97   12.05
  -1 -15  18   13.27    8.12
  -1 -15  18   16.24    8.87
  -1 -15  18   13.64   13.01
  -1 -15  17  154.17   15.82
  -1 -15  17  193.88   22.99
  -1 -15  17  150.45   13.86
  -1 -15  16   13.75    8.23
  -1 -15  16   18.58   12.53
  -1 -15  16   -1.54    7.33
  -1 -15  15   74.32   17.68
  -1 -15  15   82.66   12.16
  -1 -15  15   79.47   10.94
  -1 -15  14  115.84   18.79
  -1 -15  14   87.91   10.99
  -1 -15  14   94.71   12.21
  -1 -15  13   15.45    6.90
  -1 -15  13   21.50   14.65
  -1 -15  12   15.45   13.27
  -1 -15  12    6.05    6.11
   1  15 -12    2.81    7.64
   1  15 -11   68.32   10.94
  -1 -15  11   67.21    9.77
   1  15 -10    2.02    7.43
  -1 -15  10    1.33    5.63
  -1 -15  10   -7.96   11.41
  -1 -15   9    4.94    9.93
   1  15  -9   10.72    7.96
  -1 -15   9    1.43    5.84
  -1 -15   8    4.72    5.26
   1  15  -8    0.80    6.32
   1  15  -7   63.55    9.77
  -1 -15   7   72.04    9.02
  -1 -15   7   44.59   13.38
   1  15  -6    3.34    6.42
  -1 -15   6   13.70    6.00
   1  15  -5  -14.81    6.95
  -1 -15   5    3.98    5.41
  -1 -15   4   59.56    8.12
   1  15  -4   38.91    8.12
  -1 -15   3   15.02    5.57
   1  15  -3   17.78    6.53
  -1 -15   2  105.06    9.56
   1  15  -2   93.12    9.93
   1  15  -1    0.32    5.15
  -1 -15   1    9.18    5.10
  -1 -15   0   38.65    6.64
   1  15   0   36.95    6.85
  -1 -15  -1   11.10    4.99
   1  15   1   19.11    6.16
   1  15   2   18.90    6.58
  -1 -15  -2   25.59    5.89
   1  15   3  392.80   17.09
  -1 -15  -3  406.76   16.83
  -1 -15  -4   86.37    8.60
   1  15   4   78.73    9.02
  -1 -15  -5  267.67   13.38
   1  15   5  279.03   14.49
   1  15   6   46.56    7.91
  -1 -15  -6   43.85    6.69
  -1 -15  -7  188.57   11.36
   1  15   7  216.12   13.11
  -1 -15  -8   35.52    6.05
   1  15   8   32.97    6.53
   1  15   9   -3.03    4.94
  -1 -15  -9   -2.76    4.35
  -1 -15 -10  150.13   10.30
   1  15  10  156.24   11.31
   1  15  11  118.17   10.25
  -1 -15 -11  125.23    9.66
   1  15  12   62.96    8.18
  -1 -15 -12   52.24    6.85
  -1 -15 -13  180.92   10.99
  -1 -15 -13  182.67   16.51
   1  15  13  176.83   11.94
  -1 -15 -14    8.49    4.67
   1  15  14   18.53    5.89
  -1 -15 -14   18.42    8.97
  -1 -15 -15   21.34    5.52
  -1 -15 -15   27.29    8.97
   1  15  15   21.71    6.11
  -1 -15 -16   30.31    6.32
   1  15  16   31.69    6.42
  -1 -15 -16   37.16    9.87
   1  15  17   84.57    8.71
  -1 -15 -17   73.37    8.02
  -1 -15 -17   98.80   14.65
  -1 -15 -18   40.19   10.78
   1  15  18   44.54    7.64
  -1 -15 -18   37.96    6.48
   1  15  19    3.72    5.10
  -1 -15 -19   -1.65    4.46
  -1 -15 -19   -0.37    8.76
  -1 -15 -20   89.93    8.76
  -1 -15 -20   84.94   14.44
   1  15  20   78.78    8.76
  -1 -15 -21   50.75   13.06
  -1 -15 -21   48.15    7.38
   1  15  21   37.43    7.43
  -1 -15 -22   10.09   10.19
  -1 -15 -22   -5.57    5.57
   1  15  22   -0.32    5.57
   1  15  23   15.55    6.21
  -1 -15 -23    6.53   10.67
  -1 -15 -23   16.46    6.32
   1  15  24   18.26    6.74
  -1 -15 -24   21.66   12.42
  -1 -15 -24   14.65    6.05
  -1 -15 -25   15.08    6.64
  -1 -15 -25    3.13   11.89
   1  15  25   21.50    7.01
  -1 -15 -26   -7.33    6.16
   1  15  26    4.67    6.48
  -1 -15 -26   10.94   12.85
   1  15  27    8.44    6.74
  -1 -15 -27    2.18    6.11
  -1 -15 -27   -2.39   14.17
  -1 -16  23   24.74   11.79
  -1 -16  22  181.61   17.31
  -1 -16  21   26.44   10.14
  -1 -16  20   29.36   10.41
  -1 -16  19   -0.27    8.55
  -1 -16  18  169.72   15.45
  -1 -16  17   21.02    8.44
  -1 -16  17   12.74    9.45
  -1 -16  16   65.93   17.68
  -1 -16  16   84.25   11.68
  -1 -16  16   96.25   14.17
  -1 -16  15   65.03   18.16
  -1 -16  15   69.33   12.26
  -1 -16  15   55.42   10.09
  -1 -16  14    4.03    8.18
  -1 -16  14    0.80    7.11
  -1 -16  14   23.84   15.61
  -1 -16  13   -6.85    6.69
  -1 -16  13  -26.54   15.24
  -1 -16  12   43.27    8.55
  -1 -16  12   33.60   14.23
   1  16 -11   40.93    9.77
  -1 -16  11   56.27    9.34
  -1 -16  11   44.54   14.76
   1  16 -10   41.30    9.72
  -1 -16  10   57.81    9.40
  -1 -16  10   60.57   16.03
  -1 -16   9  124.23   11.63
   1  16  -9  119.23   13.64
   1  16  -8   65.30   10.83
  -1 -16   8   76.29   10.19
  -1 -16   7   48.68   13.91
   1  16  -7   50.49   10.25
  -1 -16   7   50.49    8.65
  -1 -16   6   41.67    7.59
   1  16  -6   30.10    8.60
   1  16  -5    6.64    6.53
  -1 -16   5   15.55    6.42
  -1 -16   4  157.19   11.89
   1  16  -4  157.35   13.27
   1  16  -3    7.54    6.90
  -1 -16   3   20.76    6.64
   1  16  -2   -5.20    5.89
  -1 -16   2   10.41    5.79
   1  16  -1   21.55    6.95
  -1 -16   1   13.06    5.79
   1  16   0   16.30    6.64
  -1 -16   0    6.48    5.57
   1  16   1   13.32    6.37
  -1 -16  -1   10.78    5.57
   1  16   2  138.61   11.73
  -1 -16  -2  140.26   10.83
   1  16   3   32.97    7.86
  -1 -16  -3   22.35    6.74
  -1 -16  -4   48.95    7.54
   1  16   4   41.51    7.43
   1  16   5  184.74   12.79
  -1 -16  -5  206.25   12.42
   1  16   6   49.32    8.28
  -1 -16  -6   50.43    7.22
   1  16   7  311.89   16.14
  -1 -16  -7  304.25   14.71
  -1 -16  -8   68.43    7.91
   1  16   8   55.26    8.39
  -1 -16  -9   25.22    6.16
   1  16   9   33.13    7.22
  -1 -16 -10   35.94    6.48
   1  16  10   44.38    8.02
   1  16  11   11.68    5.95
  -1 -16 -11   12.58    5.10
  -1 -16 -12   -2.55    4.51
   1  16  12    1.59    5.15
   1  16  13   33.02    6.80
  -1 -16 -13   42.58    7.22
   1  16  14  149.23   12.10
  -1 -16 -14  133.09   15.55
  -1 -16 -14  137.92   10.62
  -1 -16 -15    9.98    5.04
   1  16  15   11.84    5.89
  -1 -16 -15   21.29    9.82
  -1 -16 -16    1.96    4.83
   1  16  16    0.80    5.57
  -1 -16 -16    6.69    8.23
  -1 -16 -17  106.76   15.08
  -1 -16 -17   98.37    8.81
   1  16  17   99.17   10.14
  -1 -16 -18   12.63    9.77
   1  16  18    6.69    5.41
  -1 -16 -18    0.27    5.04
  -1 -16 -19   23.41   11.52
  -1 -16 -19   26.12    6.37
   1  16  19   26.38    6.85
  -1 -16 -20   -0.53    4.94
  -1 -16 -20    6.05    9.50
   1  16  20    5.73    6.53
   1  16  21   46.88    7.75
  -1 -16 -21   53.09   13.64
  -1 -16 -21   41.62    7.49
  -1 -16 -22  -19.16   12.90
  -1 -16 -22    7.86    6.00
   1  16  22   -6.42    6.16
   1  16  23   81.86    9.98
  -1 -16 -23   73.05    9.02
  -1 -16 -23   83.03   15.82
   1  16  24   19.70    7.33
  -1 -16 -24   20.33   12.63
  -1 -16 -24   12.37    5.95
  -1 -16 -25   12.74   13.01
  -1 -16 -25   -0.96    5.84
   1  16  25    3.34    6.42
  -1 -16 -26    9.02   13.06
   1  16  26    4.67    7.11
  -1 -16 -26    7.86    6.48
  -1 -17  21    6.48    9.24
  -1 -17  20   15.87   10.09
  -1 -17  19   -4.35    8.71
  -1 -17  18   27.34    9.40
  -1 -17  17    2.34    7.96
  -1 -17  16   68.16   11.10
  -1 -17  15   25.91    8.92
  -1 -17  15   56.22   13.06
  -1 -17  15   70.45   20.23
  -1 -17  14   -4.35    7.80
  -1 -17  14    2.65    8.12
  -1 -17  13    4.72    7.17
  -1 -17  13   -3.61   15.55
  -1 -17  12   20.65   15.18
  -1 -17  12   12.00    7.43
  -1 -17  11   -2.97    6.80
  -1 -17  11  -24.21   14.28
   1  17 -11    0.48    8.49
  -1 -17  10  112.17   17.57
   1  17 -10   83.19   12.32
  -1 -17  10   87.17   11.10
  -1 -17   9    7.17   11.73
  -1 -17   9   26.81    8.49
   1  17  -9   13.43    9.02
   1  17  -8   17.36    8.87
  -1 -17   8   32.60   13.54
  -1 -17   8   25.32    7.80
   1  17  -7   40.98    9.45
  -1 -17   7   46.24    8.55
  -1 -17   6   -1.70    5.63
   1  17  -6   16.03    8.55
   1  17  -5   99.27   11.68
  -1 -17   5   99.01   10.46
   1  17  -4   16.99    7.96
  -1 -17   4   14.97    6.16
  -1 -17   3   53.78    8.65
   1  17  -3   38.17    8.97
  -1 -17   2   94.28    9.93
   1  17  -2   97.79   12.00
   1  17  -1    9.61    7.38
  -1 -17   1   11.04    6.16
  -1 -17   0   16.09    5.95
   1  17   0   26.49    7.70
  -1 -17  -1   20.92    6.21
   1  17   1   13.11    7.11
  -1 -17  -2   41.41    7.01
   1  17   2   43.85    8.33
  -1 -17  -3   28.72    6.64
   1  17   3   32.65    7.64
  -1 -17  -4   11.68    6.05
   1  17   4   10.25    6.21
   1  17   5  214.74   14.07
  -1 -17  -5  236.13   13.38
   1  17   6   12.16    6.32
  -1 -17  -6    3.19    5.57
   1  17   7  820.68   25.80
  -1 -17  -7  802.53   24.00
  -1 -17  -8   34.29    6.58
   1  17   8   28.77    7.11
  -1 -17  -9  106.76    9.82
   1  17   9   95.13   10.14
   1  17  10    6.95    6.53
  -1 -17 -10   -2.18    4.62
  -1 -17 -11   11.10    6.00
   1  17  11    0.69    5.89
  -1 -17 -12   33.66    6.69
   1  17  12   36.79    8.02
  -1 -17 -13    8.02    5.04
   1  17  13    6.90    5.73
  -1 -17 -14   48.95    7.59
   1  17  14   47.83    8.39
  -1 -17 -14   44.81   11.52
   1  17  15   80.06    9.18
  -1 -17 -15   80.85    9.02
  -1 -17 -15   70.18   13.01
   1  17  16    2.55    6.32
  -1 -17 -16    5.89   10.19
  -1 -17 -16    2.65    5.20
  -1 -17 -17  137.97   10.62
   1  17  17  154.75   12.53
  -1 -17 -17  159.32   17.36
  -1 -17 -18   81.70   14.44
  -1 -17 -18   89.98    9.66
   1  17  18   89.77   10.25
  -1 -17 -19   12.42   10.19
   1  17  19    2.76    6.74
  -1 -17 -19    8.12    5.68
  -1 -17 -20   30.37   12.05
   1  17  20   31.53    8.07
  -1 -17 -20   37.00    7.43
  -1 -17 -21    7.17   12.16
  -1 -17 -21    3.40    5.84
   1  17  21    9.45    6.64
  -1 -17 -22    7.11   11.68
   1  17  22   -4.94    7.06
  -1 -17 -22   -6.85    5.68
  -1 -17 -23    0.27   12.10
   1  17  23   -1.33    6.48
  -1 -17 -23    6.48    6.32
  -1 -17 -24   44.86    8.49
   1  17  24   32.65    8.18
  -1 -17 -24   36.31   14.60
  -1 -17 -25    6.26    6.48
   1  17  25    6.74    7.64
  -1 -17 -25    9.24   14.02
  -1 -17 -26   -2.65    7.17
  -1 -18  19   -4.94    9.50
  -1 -18  18   20.39    9.98
  -1 -18  17   22.46   10.30
  -1 -18  16    4.35    8.97
  -1 -18  15   -4.62    8.44
  -1 -18  14   24.15    9.34
  -1 -18  13   72.78   20.81
  -1 -18  13    0.05    7.70
  -1 -18  12  144.93   14.12
  -1 -18  12   97.31   19.06
  -1 -18  11   70.18   11.10
  -1 -18  11  106.97   20.60
   1  18 -11   71.77   13.27
   1  18 -10    5.36    9.24
  -1 -18  10   31.48   14.65
  -1 -18  10   30.05    8.49
  -1 -18   9   -1.11   12.42
  -1 -18   9    9.24    7.33
   1  18  -9    3.03    9.29
  -1 -18   8   20.54   13.64
  -1 -18   8   13.75    7.86
   1  18  -8    4.51    8.76
  -1 -18   7   21.08    7.91
   1  18  -7   27.76    9.61
  -1 -18   7   45.39   15.66
   1  18  -6   -1.01    7.64
  -1 -18   6   -2.55    6.48
   1  18  -5   14.55    8.33
  -1 -18   5    4.14    5.73
  -1 -18   4   34.83    8.39
   1  18  -4   46.19    9.66
  -1 -18   3    7.22    6.42
   1  18  -3    1.86    7.06
   1  18  -2    6.85    7.33
  -1 -18   2    7.11    6.11
  -1 -18   1   55.74    8.23
   1  18  -1   64.50   10.46
   1  18   0   12.42    7.54
  -1 -18   0   16.09    6.21
   1  18   1   21.77    8.07
  -1 -18  -1   18.63    6.26
  -1 -18  -2   16.78    6.37
   1  18   2   17.20    7.54
   1  18   3   42.47    8.49
  -1 -18  -3   40.88    7.43
  -1 -18  -4   -5.95    5.95
   1  18   4    7.27    6.95
   1  18   5   35.52    8.81
  -1 -18  -5   34.77    7.22
   1  18   6  355.47   18.47
  -1 -18  -6  402.62   17.94
  -1 -18  -7   42.10    7.49
   1  18   7   38.38    8.39
  -1 -18  -8   32.60    6.80
   1  18   8   21.50    7.06
   1  18   9    8.23    6.32
  -1 -18  -9    5.47    5.84
   1  18  10  195.95   14.44
  -1 -18 -10  199.98   12.95
   1  18  11   13.54    6.95
  -1 -18 -11    6.80    5.36
   1  18  12   54.47    9.40
  -1 -18 -12   39.44    7.49
  -1 -18 -13  303.66   15.50
   1  18  13  337.05   17.89
  -1 -18 -14   30.47    6.80
  -1 -18 -14   37.85   11.84
   1  18  14   28.03    7.75
  -1 -18 -15   65.40    8.60
   1  18  15   66.57    9.50
  -1 -18 -15   66.89   13.70
  -1 -18 -16   83.40   13.70
  -1 -18 -16   74.43    8.92
   1  18  16   81.06   10.19
  -1 -18 -17    9.72    5.31
  -1 -18 -17   14.71   10.19
   1  18  17    5.20    7.06
  -1 -18 -18   -8.76   12.05
   1  18  18    2.50    6.37
  -1 -18 -18    4.51    5.84
   1  18  19    4.41    6.69
  -1 -18 -19   12.58   11.47
  -1 -18 -19   13.01    6.26
  -1 -18 -20   19.80   12.42
   1  18  20   22.51    7.91
  -1 -18 -20   27.34    6.80
  -1 -18 -21  -19.16   12.10
  -1 -18 -21   12.00    6.53
   1  18  21   -9.02    7.59
  -1 -18 -22   16.19   12.58
   1  18  22   12.63    7.54
  -1 -18 -22    4.72    6.74
  -1 -18 -23   32.60   14.28
  -1 -18 -23   25.06    7.70
   1  18  23   12.63    7.38
   1  18  24   11.52    7.91
  -1 -18 -24    9.45    6.95
  -1 -18 -25    2.02    6.69
  -1 -19  17   25.69   10.78
  -1 -19  16    0.80    9.82
  -1 -19  15   23.46   10.14
  -1 -19  14   22.99    9.08
  -1 -19  13   10.09    8.60
  -1 -19  12   25.22    9.72
  -1 -19  11   44.65   10.41
  -1 -19  10   72.62   19.06
  -1 -19  10   37.16    9.29
   1  19  -9   79.63   14.97
  -1 -19   9   63.71   17.31
  -1 -19   9   67.74   10.78
  -1 -19   8   45.87   16.35
  -1 -19   8   40.35    8.97
   1  19  -8   37.80   11.52
  -1 -19   7  -22.88   15.82
   1  19  -7   -3.72    9.24
  -1 -19   7    3.82    7.22
  -1 -19   6   59.51    9.72
   1  19  -6   46.61   10.83
  -1 -19   6   49.53   17.09
   1  19  -5   44.70   11.04
  -1 -19   5   64.93   10.25
  -1 -19   4    4.57    6.37
   1  19  -4  -12.16    8.92
  -1 -19   3   -2.60    6.21
   1  19  -3    1.86    7.43
   1  19  -2   54.84   10.41
  -1 -19   2   70.23    9.56
   1  19  -1    9.29    7.43
  -1 -19   1   19.16    7.06
   1  19   0   93.17   12.10
  -1 -19   0   79.90   10.09
  -1 -19  -1   70.39    9.66
   1  19   1   77.35   11.47
  -1 -19  -2   13.70    6.64
   1  19   2    1.49    7.17
  -1 -19  -3    7.91    6.00
   1  19   3    3.88    7.06
  -1 -19  -4    3.19    5.47
   1  19   4    8.44    7.27
  -1 -19  -5  102.62   10.78
   1  19   5   87.97   11.47
  -1 -19  -6   36.79    8.07
   1  19   6   29.46    8.28
   1  19   7    4.09    6.69
  -1 -19  -7    3.82    5.31
  -1 -19  -8   37.00    7.43
   1  19   8   32.60    9.29
   1  19   9  329.04   18.53
  -1 -19  -9  322.77   16.72
   1  19  10   21.08    7.70
  -1 -19 -10   19.75    6.53
  -1 -19 -11   14.65    6.64
   1  19  11    4.94    6.64
  -1 -19 -12   26.12    7.22
   1  19  12   18.63    7.75
   1  19  13   13.86    8.33
  -1 -19 -13   13.96    6.05
  -1 -19 -14   21.45   10.78
   1  19  14   31.85    8.33
  -1 -19 -14   20.01    6.42
  -1 -19 -15   38.70    7.75
  -1 -19 -15   42.05   12.74
   1  19  15   35.30    9.02
   1  19  16   14.44    7.27
  -1 -19 -16   28.14   12.00
  -1 -19 -16   10.99    5.84
   1  19  17    5.10    7.49
  -1 -19 -17    6.26    5.73
  -1 -19 -17    9.40   11.36
   1  19  18   -6.26    7.22
  -1 -19 -18   -8.49   11.57
  -1 -19 -18    0.00    5.84
  -1 -19 -19  122.15   11.79
   1  19  19  138.51   13.64
  -1 -19 -19  155.76   20.23
  -1 -19 -20   84.30   17.15
  -1 -19 -20   85.36   10.51
   1  19  20   84.30   11.36
  -1 -19 -21    7.86    6.32
   1  19  21   10.41    7.80
  -1 -19 -21    0.96   12.16
  -1 -19 -22   95.08   19.06
   1  19  22   87.81   11.36
  -1 -19 -22   91.95   10.88
  -1 -19 -23   30.58    8.28
   1  19  23   47.19   10.88
   1  19  24  107.71   13.48
  -1 -19 -24   86.64   11.20
  -1 -20  14    5.63    9.34
  -1 -20  13   47.83   11.63
  -1 -20  12   56.49   11.94
  -1 -20  11    6.05    8.18
  -1 -20  10   84.73   12.21
  -1 -20   9    5.20    7.54
  -1 -20   8   31.06    8.87
  -1 -20   7    4.35    6.95
  -1 -20   7   -8.81   15.34
  -1 -20   6   -3.40    6.64
  -1 -20   6  -12.48   15.93
   1  20  -5   72.36   13.43
  -1 -20   5   41.36    9.66
   1  20  -4    8.65    8.76
  -1 -20   4    7.22    7.27
   1  20  -3   26.92    9.98
  -1 -20   3    2.65    6.80
   1  20  -2   35.46   10.41
  -1 -20   2   33.87    8.55
   1  20  -1   90.14   12.85
  -1 -20   1  100.12   11.47
  -1 -20   0    4.35    6.32
   1  20   0   11.94    8.87
  -1 -20  -1  140.89   12.95
   1  20   1  142.38   14.44
   1  20   2   26.38    9.56
  -1 -20  -2   22.99    7.96
  -1 -20  -3   10.83    6.69
   1  20   3   15.45    8.44
  -1 -20  -4   20.07    6.69
   1  20   4   14.49    8.55
  -1 -20  -5   54.89    8.97
   1  20   5   68.48   11.36
   1  20   6   10.51    8.55
  -1 -20  -6   11.25    6.53
   1  20   7  125.07   13.38
  -1 -20  -7  123.16   11.63
  -1 -20  -8    8.33    6.00
   1  20   8   19.38    8.87
  -1 -20  -9    8.23    6.64
   1  20   9   12.37    8.02
   1  20  10   -7.06    8.07
  -1 -20 -10    0.42    5.95
   1  20  11   -5.84    7.80
  -1 -20 -11   -5.89    6.00
   1  20  12   73.95   10.78
  -1 -20 -12   66.78    8.92
  -1 -20 -13   14.55    6.95
   1  20  13   -5.68    8.76
  -1 -20 -14    5.57    6.37
  -1 -20 -14   19.06   12.26
   1  20  14    2.50    7.49
  -1 -20 -15    8.44    6.69
  -1 -20 -15   29.73   12.58
   1  20  15   20.44    8.87
  -1 -20 -16   -2.12   10.94
  -1 -20 -16    0.32    6.48
   1  20  16    3.50    7.91
   1  20  17   21.82    8.76
  -1 -20 -17   11.57    7.33
  -1 -20 -17   -0.74   11.36
  -1 -20 -18   15.87    7.33
  -1 -20 -18   16.78   12.95
   1  20  18   12.95    8.39
  -1 -20 -19   37.48   14.71
  -1 -20 -19   51.07    9.18
   1  20  19   61.95   11.36
  -1 -20 -20   19.27    7.96
  -1 -20 -20   18.21   14.28
   1  20  20   12.79    8.65
   1  20  21   68.75   11.04
  -1 -20 -21   80.48   10.94
  -1 -20 -22   48.26    9.82
   1  20  22   42.05   10.62
  -1 -20 -23   34.08    9.56
  -1 -21  11   20.81   10.25
  -1 -21  10    5.26    8.65
  -1 -21   9   37.85   10.78
  -1 -21   8   27.18    9.98
  -1 -21   7   -4.19    8.39
  -1 -21   6    9.13    7.27
  -1 -21   5   14.81    8.02
  -1 -21   4    3.40    6.90
  -1 -21   3   -2.28    6.80
  -1 -21   2    5.31    7.38
  -1 -21   1    7.54    7.06
  -1 -21   0   12.32    7.64
  -1 -21  -1   36.52    8.18
   1  21   1   37.37   10.83
  -1 -21  -2   11.68    7.54
   1  21   2   10.78    9.18
  -1 -21  -3    4.57    6.95
   1  21   3   -9.72    8.65
  -1 -21  -4   21.13    7.38
   1  21   4   25.85    9.45
  -1 -21  -5   18.74    7.43
   1  21   5    7.54    8.18
  -1 -21  -6   -1.22    6.16
   1  21   6   -3.29    8.44
  -1 -21  -7   53.72    9.50
   1  21   7   68.38   11.36
  -1 -21  -8   -7.33    6.58
   1  21   8   18.90    9.18
  -1 -21  -9    2.18    6.48
   1  21   9   -1.80    7.96
  -1 -21 -10   10.56    6.21
   1  21  10    3.93    7.86
  -1 -21 -11   47.73    9.50
   1  21  11   47.14   11.20
  -1 -21 -12   18.00    7.33
   1  21  12   26.60   10.35
  -1 -21 -13   91.31   10.88
   1  21  13  108.56   14.07
   1  21  14    5.63    8.76
  -1 -21 -14    1.75    6.21
  -1 -21 -15   61.32   15.55
  -1 -21 -15   51.34    9.18
   1  21  15   54.20   11.04
   1  21  16    9.18    9.45
  -1 -21 -16    5.95    7.22
   1  21  17    5.04    9.40
  -1 -21 -17   -4.72    7.54
  -1 -21 -17   21.39   14.65
   1  21  18   26.07    9.61
  -1 -21 -18   29.99    8.71
  -1 -21 -18   44.81   15.50
  -1 -21 -19   -7.01    7.80
   1  21  19    3.98    8.44
  -1 -21 -20   18.16    7.75
   1  21  20   42.05   10.46
  -1 -21 -21   15.24    8.02
  -1 -21 -22   96.19   12.00
  -1 -22   7   -9.87    9.13
  -1 -22   6  -10.30    8.76
  -1 -22   5  -11.25    8.44
  -1 -22   4   13.17    8.81
  -1 -22   3    5.63    8.23
  -1 -22   2   -5.36    8.39
  -1 -22   1   46.03    9.93
  -1 -22   0   10.14    7.33
  -1 -22  -1  111.17   12.63
  -1 -22  -2  -11.20    7.54
  -1 -22  -3   -7.17    7.06
  -1 -22  -4   40.08    9.29
  -1 -22  -5   -8.97    7.59
  -1 -22  -6   23.31    8.18
  -1 -22  -7   50.06    9.56
  -1 -22  -8    2.97    6.69
  -1 -22  -9    0.96    7.11
  -1 -22 -10    4.19    6.85
  -1 -22 -11   52.03    9.87
  -1 -22 -12    8.97    7.54
  -1 -22 -13   22.40    8.23
  -1 -22 -14    3.24    7.38
  -1 -22 -15   31.43    8.92
  -1 -22 -15   20.39   13.17
  -1 -22 -16   -9.29    7.80
  -1 -22 -16  -25.54   14.97
  -1 -22 -17   41.83    9.66
  -1 -22 -18   50.06    9.93
  -1 -22 -19   -2.28    7.59
  -1 -22 -20   17.15    8.97
  -1 -22 -21   -3.34    8.71
  -1 -23   3   35.52   10.46
  -1 -23   2   14.44    8.39
  -1 -23   1   25.59    9.40
  -1 -23   0    0.80    8.12
  -1 -23  -1   62.91   11.04
  -1 -23  -2   -1.54    7.86
  -1 -23  -3   74.43   12.10
  -1 -23  -4   -0.11    7.49
  -1 -23  -5    6.11    7.64
  -1 -23  -6    3.72    7.59
  -1 -23  -7  137.60   14.12
  -1 -23  -8    5.79    7.64
  -1 -23  -9   45.76   10.41
  -1 -23 -10   -0.53    7.22
  -1 -23 -11   10.35    8.02
  -1 -23 -12   28.19    9.34
  -1 -23 -13   14.81    8.92
  -1 -23 -14   47.25    9.98
  -1 -23 -15   60.57   10.72
  -1 -23 -16   35.78    9.82
  -1 -23 -17   17.36    8.12
  -1 -23 -18   47.99    9.82
  -1 -23 -19   70.87   11.89
  -1 -24  -6    6.11    8.92
  -1 -24  -7    7.22    8.71
  -1 -24  -8   -2.07    8.23
  -1 -24  -9   -4.62    8.39
  -1 -24 -10   -0.64    8.18
  -1 -24 -11    2.07    7.86
  -1 -24 -12    6.69    7.91
  -1 -24 -13   30.95    9.82
  -1 -24 -14   19.64    9.40
   2 -24 -14   12.32    9.02
   2 -24 -13   14.17    8.39
   2 -24 -12   61.10   11.57
   2 -24 -11    7.75    8.23
   2 -24 -10   -3.98    8.18
   2 -24  -9   19.32    9.56
   2 -24  -8    8.28    7.80
   2 -24  -7   14.65    8.55
   2 -24  -6   26.81    9.77
   2 -24  -5   -3.24    7.96
   2 -24  -4   15.08    8.87
   2 -24  -3   20.81    9.93
   2 -24  -2   66.25   12.48
   2 -24  -1   16.19    9.98
   2 -23 -16   -0.64    7.64
   2 -23 -15    5.63    7.22
   2 -23 -14   -2.87    7.11
   2 -23 -13    6.32    7.33
   2 -23 -12   -6.00    7.49
   2 -23 -11   12.05    7.70
   2 -23 -10   13.54    8.07
   2 -23  -9   28.61    8.60
   2 -23  -8    0.80    7.54
   2 -23  -7  -14.23    8.07
   2 -23  -6   -0.69    7.27
   2 -23  -5   44.28    9.87
   2 -23  -4  107.50   12.90
   2 -23  -3   95.93   12.63
   2 -23  -2   -3.56    7.91
   2 -23  -1   17.15    9.24
   2 -23   0   48.79   10.35
   2 -23   1   -1.11    7.80
   2 -23   2   -1.01    8.12
   2 -23   3    5.41    8.12
   2 -23   4   31.75   10.94
   2 -22 -17   -4.35    7.22
  -2  22  16  -10.30    9.66
   2 -22 -16   10.46    7.49
   2 -22 -15   44.49    9.13
  -2  22  15   47.30   10.88
  -2  22  14   41.57   10.67
   2 -22 -14   35.94    8.55
  -2  22  13   25.69   10.51
   2 -22 -13   27.82    8.12
   2 -22 -12   -4.41    7.33
  -2  22  12    3.08    9.13
  -2  22  11   35.09   11.15
   2 -22 -11   32.54    8.71
   2 -22 -10   -1.38    7.17
  -2  22  10   15.13   10.46
   2 -22  -9    7.11    6.80
  -2  22   9    5.47    9.82
   2 -22  -8   63.07   10.25
  -2  22   8   44.06   10.83
  -2  22   7   45.34   11.52
   2 -22  -7   45.34    9.34
   2 -22  -6   -6.21    6.95
  -2  22   6   21.45   10.88
  -2  22   5  127.09   15.87
   2 -22  -5  144.98   13.48
   2 -22  -4   13.38    7.70
  -2  22   4   71.77   13.64
   2 -22  -3   36.15    8.60
   2 -22  -2   31.37    9.08
   2 -22  -1    8.60    7.06
   2 -22   0  108.35   12.95
   2 -22   1   10.99    8.65
   2 -22   2   46.13   10.03
   2 -22   3   19.32    8.33
   2 -22   4   14.86    8.33
   2 -22   5    6.74    8.23
   2 -22   6   32.49   10.19
   2 -22   7   16.03   10.35
   2 -22   8   17.52    8.87
  -2  21  18   44.38   10.51
   2 -21 -18   18.21    7.54
   2 -21 -17   10.88    7.11
  -2  21  17   15.87    9.45
  -2  21  16   15.18    8.81
   2 -21 -16   -0.11    6.37
   2 -21 -15   -3.56    6.11
   2 -21 -15  -21.13   13.11
  -2  21  15   -3.61    8.28
  -2  21  14   -4.41    8.92
   2 -21 -14   -4.35   12.58
   2 -21 -14    4.51    6.48
  -2  21  13   22.77    9.82
   2 -21 -13   20.60    7.54
   2 -21 -12   30.10    7.80
  -2  21  12   28.61    9.56
  -2  21  11   47.04   10.51
   2 -21 -11   50.33    9.24
   2 -21 -10   -5.84    6.05
  -2  21  10   14.97    9.40
  -2  21   9   12.95    9.02
   2 -21  -9   12.79    6.74
   2 -21  -8   29.62    8.39
  -2  21   8   14.07    9.02
   2 -21  -7   34.83    8.12
  -2  21   7   27.23    9.82
   2 -21  -6    5.79    6.32
  -2  21   6    8.97    9.18
  -2  21   5   -0.32    9.02
   2 -21  -5   -3.61    6.11
   2 -21  -4   19.43    6.74
  -2  21   4   16.03    9.82
   2 -21  -3    3.56    6.58
  -2  21   3   10.83    9.34
  -2  21   2  -19.06   10.41
   2 -21  -2   -3.82    6.58
  -2  21   1    9.45    9.77
   2 -21  -1   19.85    8.12
  -2  21   0   18.95    9.98
   2 -21   0   12.37    8.33
  -2  21  -1   -9.77    9.29
   2 -21   1    8.33    6.80
  -2  21  -2   58.18   13.70
   2 -21   2   23.84    8.12
   2 -21   3   60.41   10.51
   2 -21   4    9.66    8.18
   2 -21   5   10.09    7.59
   2 -21   6   -4.09    8.28
   2 -21   7   32.81    9.87
   2 -21   8   75.44   12.32
   2 -21   9   61.37   11.41
   2 -21  10    4.72    8.44
   2 -21  11   -2.39    8.39
  -2  20  19   28.72    8.81
   2 -20 -19   28.99    7.70
   2 -20 -18    0.37    5.89
  -2  20  18    1.86    7.59
   2 -20 -17   22.46   13.96
  -2  20  17    2.97    8.18
   2 -20 -17   10.67    6.11
   2 -20 -16   24.53    6.58
  -2  20  16   31.00    8.81
   2 -20 -16   22.62   13.38
   2 -20 -15    9.77    6.48
  -2  20  15    6.85    7.86
   2 -20 -14    4.62   11.31
   2 -20 -14   19.38    7.01
  -2  20  14   22.56    8.71
  -2  20  13    7.33    7.54
   2 -20 -13   10.56    6.74
  -2  20  12   31.64    8.49
   2 -20 -12   30.21    7.43
  -2  20  11    9.66    7.75
   2 -20 -11    9.82    6.42
   2 -20 -10   13.11    6.37
  -2  20  10   10.94    7.75
   2 -20  -9   43.27    8.39
  -2  20   9   53.09   10.25
  -2  20   8    6.64    7.59
   2 -20  -8    5.20    5.89
   2 -20  -7   31.48    7.22
  -2  20   7   31.91    8.92
   2 -20  -6   16.35    7.06
  -2  20   6   25.80    9.56
   2 -20  -5  108.56   11.36
  -2  20   5  127.46   14.55
   2 -20  -4  422.95   20.01
  -2  20   4  408.83   22.35
   2 -20  -3    8.71    7.01
  -2  20   3   -1.43    8.12
   2 -20  -2   24.74    7.38
  -2  20   2   34.19    9.56
   2 -20  -1    2.07    6.11
  -2  20   1   -8.39    9.13
   2 -20   0   71.14   10.41
  -2  20   0   79.21   12.42
  -2  20  -1   -9.56    9.40
   2 -20   1    6.37    6.37
  -2  20  -2   28.93   11.25
   2 -20   2   31.06    8.81
  -2  20  -3   18.32   11.79
   2 -20   3   -3.88    6.74
  -2  20  -4   14.44   10.67
   2 -20   4    8.12    7.38
   2 -20   5   26.38    8.65
   2 -20   6   53.51    9.66
   2 -20   6   57.39   11.68
   2 -20   7   26.33    8.71
   2 -20   8   15.50    8.39
   2 -20   9   25.38    9.02
   2 -20  10    5.73    7.70
   2 -20  11    4.72    8.39
   2 -20  12   24.69    8.92
   2 -20  13   31.43   10.25
   2 -20  14   -7.22    9.02
   2 -19 -20   12.16    6.16
  -2  19  20   13.11    7.86
   2 -19 -19   48.36    7.70
   2 -19 -19   24.90   12.69
  -2  19  19   40.19    8.97
   2 -19 -18   26.97    6.11
   2 -19 -18   27.82   12.90
  -2  19  18   17.25    7.59
   2 -19 -17   19.70    6.32
  -2  19  17   20.44    8.23
   2 -19 -17   34.98   12.74
   2 -19 -16    8.92    5.73
   2 -19 -16   18.37   13.32
  -2  19  16    2.92    6.90
  -2  19  15    4.46    6.90
   2 -19 -15   18.63   13.17
   2 -19 -15    1.96    5.04
   2 -19 -14   20.49    6.48
  -2  19  14   18.37    7.59
   2 -19 -14   20.28   11.89
   2 -19 -13   -3.72    5.52
  -2  19  13    1.70    6.90
  -2  19  12   63.39    9.87
   2 -19 -12   66.84    8.39
  -2  19  11   18.16    7.27
   2 -19 -11   11.63    6.21
  -2  19  10   -5.20    6.69
   2 -19 -10    7.49    5.89
   2 -19  -9    4.78    5.52
  -2  19   9   16.56    7.59
  -2  19   8   -0.21    7.43
   2 -19  -8    8.55    5.73
  -2  19   7    3.19    7.01
   2 -19  -7   -3.34    5.79
  -2  19   6    3.72    7.33
   2 -19  -6    3.45    5.95
  -2  19   5    4.03    7.33
   2 -19  -5    5.47    5.84
  -2  19   4   60.68   10.56
   2 -19  -4   69.54    9.34
  -2  19   3  135.59   13.59
   2 -19  -3  158.15   12.79
  -2  19   2   67.79   10.62
   2 -19  -2   81.06   10.30
   2 -19  -1   67.90    9.72
  -2  19   1   60.41   10.51
   2 -19   0   14.07    7.11
  -2  19   0   14.23    8.55
   2 -19   1   81.28   10.56
  -2  19  -1   66.15   11.89
  -2  19  -2    9.40    8.39
   2 -19   2   12.10    6.95
  -2  19  -3  106.23   13.80
   2 -19   3  130.97   12.79
   2 -19   4  247.49   16.62
  -2  19  -4  218.14   17.89
   2 -19   5   56.22    9.93
   2 -19   6  112.92   12.16
   2 -19   7   62.17   10.46
   2 -19   7   46.61   10.41
   2 -19   8   53.03   18.79
   2 -19   8   18.05    8.39
   2 -19   8   38.70    9.29
   2 -19   9   38.91   17.41
   2 -19   9   20.54   10.30
   2 -19   9   14.65    7.80
   2 -19  10   18.69    8.55
   2 -19  11    8.12    8.49
   2 -19  12    5.84    8.18
   2 -19  13   32.01   11.10
   2 -19  14   56.54   11.89
   2 -19  15  107.56   14.97
   2 -19  16   -3.29    9.50
  -2  18  21   -6.58    7.17
   2 -18 -21    8.76   12.63
   2 -18 -21   -4.35    6.00
   2 -18 -20   39.07    6.95
  -2  18  20   47.94    8.92
   2 -18 -20   27.50   13.38
   2 -18 -19   13.80   13.38
  -2  18  19   18.79    7.80
   2 -18 -19    9.50    5.47
  -2  18  18    2.34    6.21
   2 -18 -18   -9.29   10.94
   2 -18 -18    2.87    4.94
   2 -18 -17    9.56   11.47
  -2  18  17   -4.46    6.53
   2 -18 -17    1.54    5.10
   2 -18 -16   29.57   12.90
  -2  18  16   12.69    6.85
   2 -18 -16   16.35    5.89
  -2  18  15    4.88    6.95
   2 -18 -15   -3.19    4.88
   2 -18 -15   -0.42   10.14
   2 -18 -14   29.57   12.05
  -2  18  14   31.48    7.38
   2 -18 -14   35.78    6.80
  -2  18  13   -1.49    6.69
   2 -18 -13    1.43    4.94
  -2  18  12   -0.69    6.64
   2 -18 -12   -2.97    5.41
  -2  18  11   50.06    8.33
   2 -18 -11   63.65    8.28
  -2  18  10   25.91    7.01
   2 -18 -10   30.63    6.64
  -2  18   9   -3.61    6.32
   2 -18  -9   -4.19    5.26
   2 -18  -8  162.18   11.31
  -2  18   8  146.36   11.94
  -2  18   7   73.31    9.66
   2 -18  -7   68.64    8.39
  -2  18   6   22.40    7.86
   2 -18  -6   16.83    6.00
  -2  18   5    3.61    6.64
   2 -18  -5    2.50    5.57
  -2  18   4    2.44    6.42
   2 -18  -4    1.06    5.04
  -2  18   3   20.17    7.80
   2 -18  -3   18.32    6.48
  -2  18   2   19.64    8.28
   2 -18  -2   22.77    6.53
   2 -18  -1    9.02    6.11
  -2  18   1    6.21    7.06
  -2  18   0   20.76    8.28
   2 -18   0   11.41    6.42
  -2  18  -1   30.05    8.92
   2 -18   1   32.65    7.38
  -2  18  -2   16.03    8.92
   2 -18   2   10.19    6.74
  -2  18  -3   98.27   12.69
   2 -18   3  104.32   10.94
  -2  18  -4   17.68    8.60
   2 -18   4   25.85    7.17
  -2  18  -5  191.43   16.19
   2 -18   5  173.01   13.48
   2 -18   6    1.06    6.37
   2 -18   7   63.55    9.45
   2 -18   7   59.72   10.56
   2 -18   8    5.15    6.95
   2 -18   8    1.43    6.53
   2 -18   9   79.79   11.79
   2 -18   9   75.33   11.15
   2 -18   9   81.60   18.69
   2 -18  10   29.73    9.98
   2 -18  10   38.38    9.24
   2 -18  11   80.00   12.21
   2 -18  11   83.88   18.53
   2 -18  11   92.85   12.37
   2 -18  12   33.92   16.09
   2 -18  12   37.48   10.19
   2 -18  12   13.01    8.49
   2 -18  13   10.83    8.39
   2 -18  14  290.92   19.91
   2 -18  15    3.24    9.13
   2 -18  16    4.88    8.87
   2 -18  17   20.12    9.50
   2 -18  18    4.25    9.66
   2 -18  19    7.54    9.87
  -2  17  22    5.04    6.53
   2 -17 -22   -7.01   12.53
   2 -17 -22    4.09    5.47
   2 -17 -21   61.42    7.17
  -2  17  21   66.15    8.60
   2 -17 -20    9.66    5.36
  -2  17  20   10.88    6.48
   2 -17 -19    3.08    4.67
  -2  17  19    6.58    6.21
   2 -17 -19   -9.13   13.01
   2 -17 -18    9.82   11.25
  -2  17  18   -0.85    6.53
   2 -17 -18   10.25    5.04
   2 -17 -17   -0.11    4.83
   2 -17 -17    3.13    9.82
  -2  17  17   -2.28    5.95
   2 -17 -16    5.31   10.03
  -2  17  16   -0.96    5.73
   2 -17 -16    6.58    5.31
   2 -17 -15   25.38    5.79
   2 -17 -15   14.71    9.98
  -2  17  15   26.38    7.11
   2 -17 -14   -0.69    9.29
  -2  17  14   16.93    7.17
   2 -17 -14    3.24    4.57
  -2  17  13    6.48    6.00
   2 -17 -13    0.00    4.57
   2 -17 -12  111.43    9.18
[truncated: 2,697,769 more chars]
